# Supplementary material for: Copper-catalyzed stereo- and regioselective hydrophosphorylation of terminal alkynes: scope and mechanistic study
Source: Royal Society of Chemistry journal article supplement (doi:10.1039/d2ra02908a), 2022-01-01
Supplement: d2ra02908a1.pdf [file d2ra02908a1.pdf]

## Copper-Catalyzed Stereo- and Regioselective Hydrophosphorylation of Terminal Alkynes: Scope and Mechanistic Study

Junchen Li, Zhenhua Gao, Yongbiao Guo, Haibo Liu, Peichao Zhao, Xiaojing Bi\*,  
Enxue Shi\*, Junhua Xiao\*

State Key Laboratory of NBC Protection for Civilian, Beijing, P. R. China  
Email: [xiao.junhua@pku.edu.cn](mailto:xiao.junhua@pku.edu.cn); [exshi@sina.com](mailto:exshi@sina.com); [xiaojingbimail@yeah.net](mailto:xiaojingbimail@yeah.net)

### Table of Contents

|                                                                              |     |
|------------------------------------------------------------------------------|-----|
| 1. General experimental .....                                                | 1   |
| 2. General procedure.....                                                    | 1   |
| 3. Optimization details.....                                                 | 2   |
| 4. Structure Determination of the <i>E</i> -alkenylphosphorus compounds..... | 4   |
| 5. Computational details .....                                               | 5   |
| 6. Cartesian coordinates .....                                               | 5   |
| 7. Characterization Data .....                                               | 29  |
| 8. NMR spectra .....                                                         | 52  |
| 9. Reference.....                                                            | 159 |

## 1. General experimental

Anhydrous tetrahydrofuran (THF), *N,N*-dimethylformamide (DMF), Acetonitrile (MeCN), hexane, methyl *tert*-butyl ether (MTBE), EtOAc, and dichloromethane (DCM) were purchased from J&K. All reagents were purchased at the highest commercial quality and used as received without further purification unless otherwise stated. All experiments were carried out under ambient air with no precautions taken to exclude moisture. Reactions were monitored by thin layer chromatography (TLC), GC-MS, and LC/MS. TLC was performed using 0.25 mm E. Merck silica plates (60F-254), using short-wave UV light as the visualizing agent, or KMnO<sub>4</sub> and heat as developing agents. Flash column chromatography was performed using 200-300 mesh silica gel obtained from Qingdao Haiyang Chemical Co., Ltd. NMR spectra were recorded on an Bruker Ultrashield™ 300 MHz instrument and are calibrated using residual undeuterated solvent (TMS @ 0.00 ppm, CDCl<sub>3</sub> @ 7.26 ppm, *d*<sub>6</sub>-DMSO @ 2.50 ppm, *d*<sub>7</sub>-DMF @ 2.92 & 2.75 ppm <sup>1</sup>H NMR, CDCl<sub>3</sub> @ 77.16 ppm, *d*<sub>6</sub>-DMSO @ 39.52 ppm, *d*<sub>7</sub>-DMF @ 163.15 ppm <sup>13</sup>C NMR). The <sup>31</sup>P NMR chemical shifts are proton decoupled referenced to the deuterium solvent calibrated in <sup>1</sup>H NMR. The following abbreviations were used to explain multiplicities: s = singlet, d = doublet, t = triplet, m = multiplet, br = broad. High-resolution mass spectra (HRMS) were recorded on an Agilent 1200 HPLC/6520 Accurate-Mass Q-TOF LC/MS mass spectrometer by electrospray ionization time of flight reflectron experiments. HPLC analyses were conducted on a Agilent 1260 LC/MS with a MZ PerfectChrom 100 C8 column (4.6 ID x 150 mm, 5 μm). Preparative HPLC were conducted on an Buchi Pure C850 instrument with a MZ PerfectChrom 100 C8 Prep column (30 ID x 150 mm, 5 μm).

## 2. General procedure

**Product synthesis:** to a 5 mL vessel, CuCl (0.09 mmol, 30 mol%), TBD (0.09 mmol, 30 mol%), DMF (2 mL), alkyne (0.3 mmol), and P(O)H compound (0.3 mmol) were added in sequence, then the reaction was stirred for 5-24 h at 100 °C. After cooling down to room temperature, the reaction mixture was filtered through a short pad of celite™ 545, washed with DCM (50 mL), and then extracted with saturated salt water (50 mL x 3 times). The organic layer was then dried over anhydrous Na<sub>2</sub>SO<sub>4</sub>, and concentrated. The crude product was purified by column chromatography with petroleum ether/EtOAc or MeCN/H<sub>2</sub>O as eluents to afford the desired product.

**Competitive experiments:** similar to above manipulations, 0.3 mmol of each substrate was employed. The yields were determined by GC-MS.

**Deuterium-labeling experiments:** similar to above manipulations. The deuterium content of **5ak** was determined by  $^1\text{H}$  NMR.

### 3. Optimization details

Table S1 Optimization of the solvents <sup>a, b</sup>

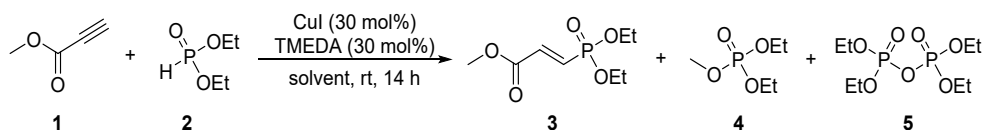

| Entry | Solvent | Yield of 3 (%) | Yield of 4 (%) | Yield of 5 (%) |
|-------|---------|----------------|----------------|----------------|
| 1     | Toluene | 22             | 16             | 17             |
| 2     | THF     | 13             | 20             | 28             |
| 3     | MeCN    | 17             | 8              | 0              |
| 4     | DCM     | 6              | 32             | 31             |
| 5     | Hexane  | 3              | 10             | 0              |
| 6     | MTBE    | 11             | 16             | 25             |
| 7     | EtOAc   | 13             | 19             | 23             |
| 8     | PhOMe   | 25             | 9              | 8              |
| 9     | DMF     | 29             | 11             | 0              |

<sup>a</sup>Conditions: alkyne **1** (0.3 mmol), diethyl phosphite **2** (0.36 mmol),  $\text{CuI}$  (30 mol%),  $\text{TMEDA}$  (30 mol%), solvent (2 mL), air, 14 h. <sup>b</sup>Yields were determined by GC-MS.

Table S2 Optimization of the organic bases <sup>a, b</sup>

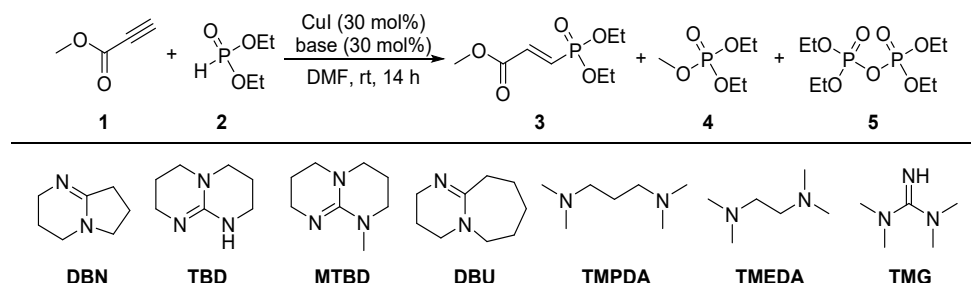

| Entry | Base | Yield of 3 (%) | Yield of 4 (%) | Yield of 5 (%) |
|-------|------|----------------|----------------|----------------|
| 1     | DBN  | 0              | 0              | 0              |
| 2     | TBD  | 13             | 0              | 0              |
| 3     | MTBD | 0              | 0              | 5              |

| Entry | Base              | Yield of 3 (%) | Yield of 4 (%) | Yield of 5 (%) |
|-------|-------------------|----------------|----------------|----------------|
| 4     | DBU               | 0              | 0              | 0              |
| 5     | DMAP              | 9              | 0              | 0              |
| 6     | TMPDA             | 19             | 7              | 0              |
| 7     | TMG               | 11             | 0              | 0              |
| 8     | DABCO             | 0              | 35             | 21             |
| 9     | Et <sub>3</sub> N | 0              | 0              | 0              |

<sup>a</sup>Conditions: alkyne **1** (0.36 mmol), diethyl phosphite **2** (0.3 mmol), CuI (30 mol%), base (30 mol%), DMF (2 mL), air, 14 h. <sup>b</sup>Yields were determined by GC-MS.

Table S3 Optimization of temperature <sup>a, b</sup>

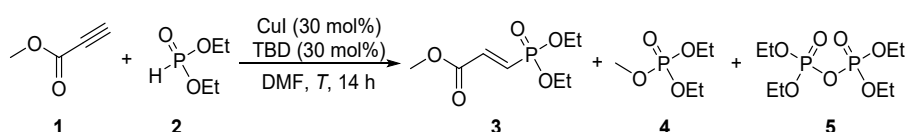

| Entry | Temp (°C) | Yield of 3 (%) | Yield of 4 (%) | Yield of 5 (%) |
|-------|-----------|----------------|----------------|----------------|
| 1     | 80        | 19             | 0              | 0              |
| 2     | 100       | 84             | 0              | 0              |
| 3     | 120       | 67             | 0              | 5              |

<sup>a</sup>Conditions: alkyne **1** (0.36 mmol), diethyl phosphite **2** (0.3 mmol), CuI (30 mol%), TBD (30 mol%), DMF (2 mL), air, 14 h. <sup>b</sup>Yields were determined by GC-MS.

Table S4 Further optimization of catalyst and base loading <sup>a, b</sup>

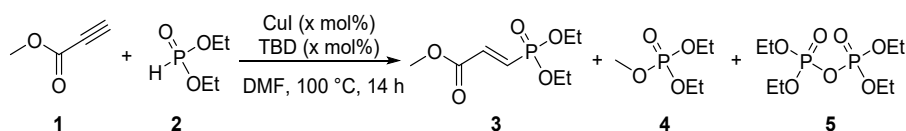

| Entry | CuI (mol%) | TBD (mol%) | Yield of 3 (%) | Yield of 4 (%) | Yield of 5 (%) |
|-------|------------|------------|----------------|----------------|----------------|
| 1     | 0          | 0          | 0              | 0              | 0              |
| 2     | 0          | 30         | 10             | 0              | 0              |
| 3     | 5          | 30         | 12             | 0              | 0              |
| 4     | 15         | 30         | 32             | 0              | 0              |
| 5     | 30         | 0          | 0              | 0              | 0              |
| 6     | 30         | 15         | 55             | 0              | 0              |
| 7     | 30         | 50         | 58             | 0              | 0              |

<sup>a</sup>Conditions: alkyne **1** (0.36 mmol), diethyl phosphite **2** (0.3 mmol), CuI (x mol%), TBD (x mol%), DMF (2 mL), air, 14 h. <sup>b</sup>Yields were determined by GC-MS.

Table S5 Further optimization of catalyst<sup>a, b</sup>

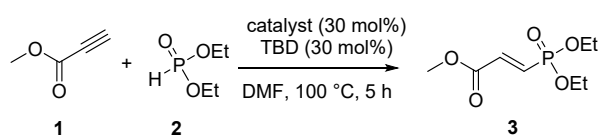

| Entry | Cu catalyst                           | Yield (%)            |
|-------|---------------------------------------|----------------------|
| 1     | CuI                                   | 57                   |
| 2     | CuBr                                  | 83                   |
| 3     | CuCl                                  | 88 (81) <sup>c</sup> |
| 4     | CuCl <sub>2</sub>                     | 0                    |
| 5     | CuCN                                  | 12                   |
| 6     | CuOTf                                 | 6                    |
| 7     | Cu(MeCN) <sub>4</sub> PF <sub>6</sub> | 48                   |

<sup>a</sup>Conditions: alkyne **1** (0.36 mmol), diethyl phosphite **2** (0.3 mmol), catalyst (30 mol%), TBD (30 mol%), DMF (2 mL), air, 5 h. <sup>b</sup>Yields were determined by GC-MS. <sup>c</sup>Isolated yield in parentheses.

#### 4. Structure Determination of the *E*-alkenylphosphorus compounds

We selected the compound of **3ap** to demonstrate its absolute configuration. The single <sup>31</sup>P peak at 19.66 ppm clearly shows that this compound is a single isomer. From figure S1, we can observe that the chemical shift of COCH=CHP(O) is 7.53 ppm, and its H-H coupling constant is calculated as 17.0 Hz. The chemical shift of COCH=CHP(O) is 6.90 ppm, and the H-H coupling constant is calculated as 17.0 Hz. As for the *E*-isomers, their coupling constants generally lie in the range of 12 -20 Hz, whereas the coupling constants of *Z*-isomers lie in the range of 3-13 Hz. Consequently, the absolute configuration of **3ap** is precisely examined as *E*-isomer. Similarly, the configuration of the other compounds were determined as *E*-isomer.

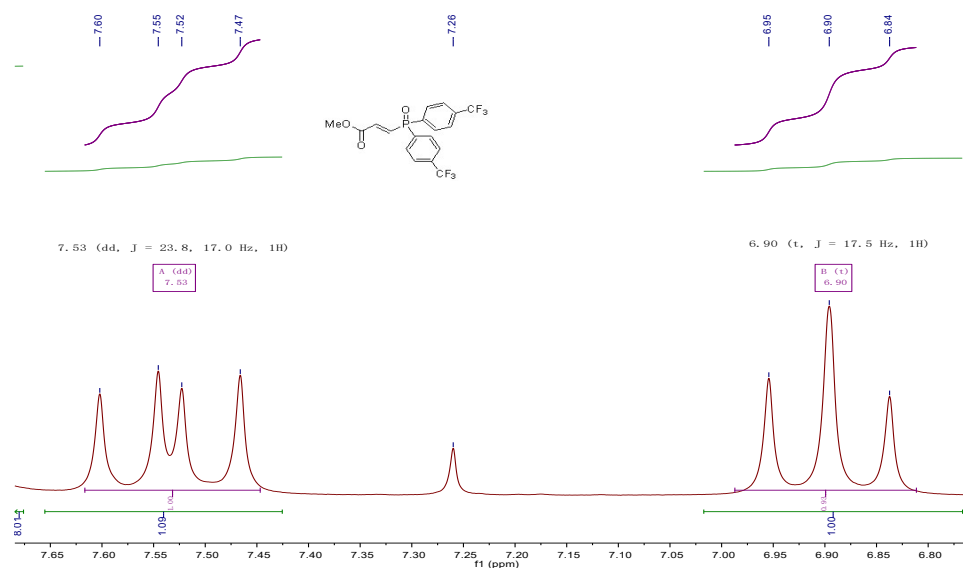

Figure S1 The <sup>1</sup>H NMR of compound **5ap** (7.65-6.60 ppm)

## 5. Computational details

DFT calculations were performed using the Gaussian 16 package.<sup>1</sup> All of the structures are optimized using the M06 functional<sup>2</sup> with the basis set 6-311G\* for Cu<sup>3</sup> and 6-31G\* for other elements.<sup>4</sup> Vibrational analyses were performed to ensure intermediates to have no imaginary frequencies and the transition state structures to have only one imaginary frequency. Transition state structures were confirmed to connect appropriate reactants or products by intrinsic reaction coordinate (IRC) calculations.<sup>5</sup> Solvent effects were considered using DMF with the SMD<sup>6</sup> model at the M06/6-311++G\*\* level<sup>7-9</sup> with 6-311G\* for Cu.<sup>3</sup>

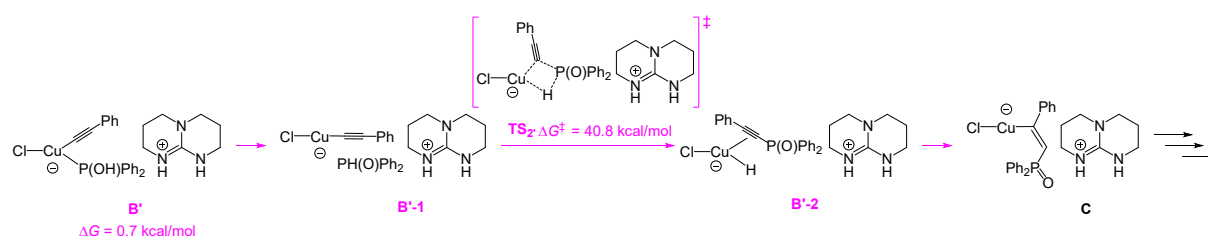

Figure S2. A proposed unfavorable pathway from the the phenylethynyl Cu(I) complex B'.

## 6. Cartesian coordinates

|   |                  |             |             |
|---|------------------|-------------|-------------|
| A | E = -3727.366431 |             |             |
| C | -0.39465900      | 0.98561500  | -1.74596100 |
| C | -1.42414700      | 0.27077100  | -1.71224500 |
| C | -2.80184300      | -0.07525300 | -1.94633400 |
| C | -3.70083300      | 0.94177200  | -2.30727400 |
| C | -3.26719900      | -1.38815500 | -1.81367800 |
| C | -5.04073800      | 0.64885300  | -2.51915900 |
| H | -3.32657500      | 1.95880100  | -2.42215300 |
| C | -4.61017000      | -1.67387800 | -2.03197200 |
| H | -2.56412100      | -2.16965500 | -1.52388800 |
| C | -5.49889700      | -0.66028600 | -2.37984800 |
| H | -5.73049300      | 1.44356300  | -2.79873600 |
| H | -4.96467700      | -2.69785700 | -1.92680400 |
| H | -6.54998900      | -0.88946500 | -2.54820600 |

|    |             |             |             |
|----|-------------|-------------|-------------|
| Cu | 0.00956000  | -0.50478600 | -0.61072600 |
| H  | 0.28208200  | 1.77472000  | -2.03732300 |
| P  | 2.02640500  | -0.09362900 | 0.29277800  |
| C  | 2.82738700  | 1.43236400  | -0.30305700 |
| C  | 3.04944800  | 2.51039500  | 0.55351000  |
| C  | 3.16456600  | 1.54808900  | -1.65554800 |
| C  | 3.60636200  | 3.68965100  | 0.06404900  |
| H  | 2.79544100  | 2.40968300  | 1.60858500  |
| C  | 3.71809400  | 2.72586400  | -2.14300800 |
| H  | 2.99925000  | 0.70267200  | -2.32806400 |
| C  | 3.93867200  | 3.79967600  | -1.28199700 |
| H  | 3.78428500  | 4.52540700  | 0.73935100  |
| H  | 3.98374300  | 2.80696900  | -3.19596600 |
| H  | 4.37087400  | 4.72335100  | -1.66377300 |
| C  | 3.34121800  | -1.32310100 | 0.08583800  |
| C  | 3.02794800  | -2.58850700 | -0.41342800 |
| C  | 4.65960100  | -1.02496800 | 0.44756800  |
| C  | 4.02928100  | -3.54459400 | -0.55920500 |
| H  | 1.99402300  | -2.82734000 | -0.66661500 |
| C  | 5.65431400  | -1.98236400 | 0.30597300  |
| H  | 4.90008600  | -0.03585500 | 0.83898400  |
| C  | 5.33834700  | -3.24183900 | -0.20178100 |
| H  | 3.78239900  | -4.53057100 | -0.94904700 |
| H  | 6.67973000  | -1.74869600 | 0.58820900  |
| H  | 6.12001400  | -3.99149700 | -0.31762200 |
| O  | 1.93055500  | 0.11577300  | 1.89122700  |
| N  | -0.51097000 | 1.13109100  | 1.92374700  |
| N  | -2.85963600 | 0.89922200  | 1.70656000  |
| N  | -1.55456900 | -0.75112000 | 2.70965400  |
| H  | -0.63247700 | -1.16950700 | 2.67115100  |
| C  | -1.62142300 | 0.45833500  | 2.08341500  |

|    |             |             |            |
|----|-------------|-------------|------------|
| C  | -0.58263700 | 2.47503900  | 1.38620200 |
| H  | -0.42885500 | 2.47383200  | 0.29065100 |
| H  | 0.24920000  | 3.05897500  | 1.80831300 |
| C  | -1.91060800 | 3.14122700  | 1.69689700 |
| H  | -2.01045300 | 3.27598700  | 2.78415100 |
| H  | -1.98061200 | 4.13167300  | 1.22903300 |
| C  | -3.02381600 | 2.24820000  | 1.19367200 |
| H  | -4.00918700 | 2.61513300  | 1.52049000 |
| H  | -3.03384000 | 2.22710600  | 0.08743300 |
| H  | -4.52415000 | 0.24745400  | 0.64740900 |
| H  | -4.74417500 | 0.29373700  | 2.41129700 |
| C  | -3.64676200 | -1.42688600 | 1.67604100 |
| H  | -4.54968100 | -2.04076000 | 1.78711500 |
| H  | -3.14333500 | -1.72476300 | 0.74709900 |
| H  | -3.19537300 | -1.49549700 | 3.79107000 |
| H  | -2.30158500 | -2.67693400 | 2.81008600 |
| C  | -4.02882300 | 0.03505000  | 1.60993700 |
| C  | -2.68689400 | -1.65148100 | 2.82426300 |
| Cl | -0.56393400 | -2.52813600 | 0.13325500 |
| H  | 0.99903300  | 0.49280800  | 2.08507300 |

**TS<sub>A-B</sub>** E = -3727.365788

|   |             |             |             |
|---|-------------|-------------|-------------|
| C | -0.51653500 | 1.18993700  | -1.56709400 |
| C | -1.50547900 | 0.42048000  | -1.63233100 |
| C | -2.88412800 | 0.06608800  | -1.84945200 |
| C | -3.82570000 | 1.09941500  | -1.98590500 |
| C | -3.31436200 | -1.26468900 | -1.90214400 |
| C | -5.17207200 | 0.80592200  | -2.15022800 |
| H | -3.47873900 | 2.13248000  | -1.96420000 |
| C | -4.66465300 | -1.55047700 | -2.07242000 |
| H | -2.57759700 | -2.06134600 | -1.79129700 |



|    |             |             |             |
|----|-------------|-------------|-------------|
| C  | -5.59537900 | -0.52158500 | -2.18972800 |
| H  | -5.89460600 | 1.61381200  | -2.25442400 |
| H  | -4.99130500 | -2.58835400 | -2.11011800 |
| H  | -6.65150300 | -0.75266500 | -2.31963300 |
| Cu | 0.02202500  | -0.46664600 | -0.77231900 |
| H  | 0.10426600  | 2.05766100  | -1.73180400 |
| P  | 1.98056200  | -0.03432800 | 0.24504700  |
| C  | 2.77371900  | 1.49753300  | -0.35024700 |
| C  | 2.75486500  | 2.65065400  | 0.43363100  |
| C  | 3.29683300  | 1.55583400  | -1.64554500 |
| C  | 3.26281300  | 3.84696000  | -0.06751800 |
| H  | 2.35375600  | 2.59522300  | 1.44633000  |
| C  | 3.80331700  | 2.74921500  | -2.14477200 |
| H  | 3.31264200  | 0.65397000  | -2.26203000 |
| C  | 3.78572100  | 3.89812900  | -1.35533700 |
| H  | 3.25313300  | 4.74289900  | 0.55203100  |
| H  | 4.21575400  | 2.78632000  | -3.15203300 |
| H  | 4.18079800  | 4.83414900  | -1.74738500 |
| C  | 3.34150200  | -1.22659100 | 0.13597800  |
| C  | 3.17990900  | -2.41530100 | -0.57550900 |
| C  | 4.55543200  | -0.95978200 | 0.77942200  |
| C  | 4.22962400  | -3.32774300 | -0.65255000 |
| H  | 2.22090600  | -2.63513300 | -1.04590700 |
| C  | 5.59638900  | -1.87431300 | 0.70709700  |
| H  | 4.67567700  | -0.02970100 | 1.33625500  |
| C  | 5.43336800  | -3.05833700 | -0.01215100 |
| H  | 4.09959400  | -4.25595600 | -1.20636800 |
| H  | 6.54028400  | -1.66686800 | 1.20918900  |
| H  | 6.25219200  | -3.77425600 | -0.07029000 |
| O  | 1.76432000  | 0.20624200  | 1.81316200  |
| N  | -0.53034200 | 1.19007000  | 1.99490300  |

|    |             |             |             |
|----|-------------|-------------|-------------|
| N  | -2.80422100 | 0.57072200  | 1.82448200  |
| N  | -1.16606000 | -0.96066100 | 2.44809100  |
| H  | -0.17182900 | -1.15366600 | 2.48953800  |
| C  | -1.49307000 | 0.29962200  | 2.07266000  |
| C  | -0.85964400 | 2.54584200  | 1.61133300  |
| H  | -0.82584400 | 2.66210700  | 0.51161300  |
| H  | -0.09345600 | 3.21753200  | 2.02287900  |
| C  | -2.23982700 | 2.93191700  | 2.11097000  |
| H  | -2.24717200 | 2.91317600  | 3.21061400  |
| H  | -2.51275000 | 3.94572900  | 1.79170600  |
| C  | -3.24589600 | 1.93424300  | 1.57682700  |
| H  | -4.22550500 | 2.06215400  | 2.06321800  |
| H  | -3.40279000 | 2.07571800  | 0.49194800  |
| H  | -4.47995900 | -0.21162500 | 0.88736200  |
| H  | -4.46459100 | -0.40905000 | 2.65547800  |
| C  | -3.24086900 | -1.83542600 | 1.56733400  |
| H  | -4.02188200 | -2.59475100 | 1.69758700  |
| H  | -2.83472600 | -1.93855500 | 0.55326200  |
| H  | -2.49096300 | -2.14310000 | 3.57889000  |
| H  | -1.57224700 | -2.97948700 | 2.29816600  |
| C  | -3.83575600 | -0.45625800 | 1.74813000  |
| C  | -2.10826600 | -2.05674200 | 2.54734300  |
| Cl | -0.41654400 | -2.62719900 | -0.44662000 |
| H  | 0.78122800  | 0.69349600  | 1.96912400  |

**B** E = -3727.374125

|   |             |             |             |
|---|-------------|-------------|-------------|
| C | -0.53894800 | 0.77855300  | -1.63379100 |
| C | -1.50939300 | -0.02188900 | -1.59989000 |
| C | -2.87821700 | -0.42538600 | -1.79055400 |
| C | -3.83179900 | 0.54201800  | -2.15102600 |
| C | -3.28923300 | -1.74941000 | -1.59110600 |

|    |             |             |             |
|----|-------------|-------------|-------------|
| C  | -5.16884200 | 0.19536500  | -2.28847300 |
| H  | -3.49946500 | 1.56561600  | -2.32774200 |
| C  | -4.62921800 | -2.09004200 | -1.73727900 |
| H  | -2.54362300 | -2.49435200 | -1.30911400 |
| C  | -5.57105900 | -1.12276400 | -2.07870300 |
| H  | -5.89957400 | 0.95254500  | -2.56885600 |
| H  | -4.93997000 | -3.12187600 | -1.58203500 |
| H  | -6.61937700 | -1.39600900 | -2.18843300 |
| Cu | 0.04609900  | -0.73103000 | -0.63397500 |
| H  | 0.05639600  | 1.63268800  | -1.92509300 |
| P  | 1.94562500  | -0.03684100 | 0.34454800  |
| C  | 2.63173800  | 1.45222800  | -0.48080200 |
| C  | 2.73743800  | 2.65222800  | 0.22277000  |
| C  | 2.96596800  | 1.42847600  | -1.83825000 |
| C  | 3.16947400  | 3.81188800  | -0.41827600 |
| H  | 2.50084000  | 2.65433000  | 1.28828900  |
| C  | 3.39488800  | 2.58379900  | -2.48016600 |
| H  | 2.89063900  | 0.48962800  | -2.39299700 |
| C  | 3.49406500  | 3.78028200  | -1.77026500 |
| H  | 3.25830600  | 4.74316400  | 0.14076700  |
| H  | 3.65653700  | 2.55488200  | -3.53720000 |
| H  | 3.82803700  | 4.68635700  | -2.27400300 |
| C  | 3.38441000  | -1.15158400 | 0.24044000  |
| C  | 3.26925000  | -2.39026000 | -0.38882000 |
| C  | 4.60657000  | -0.77477700 | 0.80671500  |
| C  | 4.37147500  | -3.23884900 | -0.46943400 |
| H  | 2.30392500  | -2.69813900 | -0.79430400 |
| C  | 5.70337900  | -1.62231200 | 0.73042500  |
| H  | 4.68870100  | 0.19242500  | 1.30542000  |
| C  | 5.58583600  | -2.85450600 | 0.08740900  |
| H  | 4.27573900  | -4.20645800 | -0.95996800 |

|    |             |             |             |
|----|-------------|-------------|-------------|
| H  | 6.65518900  | -1.32461700 | 1.16873900  |
| H  | 6.44718500  | -3.51870200 | 0.02657000  |
| O  | 1.69737900  | 0.38353600  | 1.82404600  |
| N  | -0.61967000 | 1.83943400  | 1.65124500  |
| N  | -2.77449000 | 0.93800600  | 1.75055400  |
| N  | -0.91542600 | -0.28185200 | 2.45934200  |
| H  | 0.12161800  | -0.31096700 | 2.44361400  |
| C  | -1.44682500 | 0.82517900  | 1.94236800  |
| C  | -1.06054700 | 3.03424600  | 0.96338800  |
| H  | -1.01928700 | 2.89136200  | -0.12967000 |
| H  | -0.36989800 | 3.84688600  | 1.21680500  |
| C  | -2.47625500 | 3.35141900  | 1.40064900  |
| H  | -2.48005500 | 3.61147400  | 2.46873900  |
| H  | -2.87130100 | 4.20990800  | 0.84490000  |
| C  | -3.35697500 | 2.14088400  | 1.16499500  |
| H  | -4.34523200 | 2.28364100  | 1.62440700  |
| H  | -3.51754300 | 1.96927500  | 0.08551800  |
| H  | -4.46187900 | -0.15421000 | 1.23717300  |
| H  | -4.19079700 | 0.00595800  | 2.98471900  |
| C  | -2.96203200 | -1.50161300 | 2.00944400  |
| H  | -3.63078000 | -2.28867600 | 2.37723700  |
| H  | -2.67200600 | -1.76366300 | 0.98311400  |
| H  | -1.95094400 | -1.36846300 | 3.92839800  |
| H  | -1.09420600 | -2.32480700 | 2.68520000  |
| C  | -3.68775700 | -0.17283000 | 2.01924500  |
| C  | -1.70746800 | -1.43365800 | 2.85561300  |
| H  | 0.38460400  | 1.57824600  | 1.70458100  |
| Cl | -0.35849900 | -2.81426200 | 0.04189200  |

**TS<sub>B-C</sub>** E = -3727.3288

|   |            |            |             |
|---|------------|------------|-------------|
| C | 0.14504800 | 0.55507000 | -1.28216400 |
|---|------------|------------|-------------|

|    |             |             |             |
|----|-------------|-------------|-------------|
| C  | -1.07817700 | 0.11041600  | -1.20326400 |
| C  | -2.35488100 | 0.44893500  | -1.77523600 |
| C  | -2.77798900 | 1.78735200  | -1.88983800 |
| C  | -3.25486900 | -0.55748300 | -2.16928800 |
| C  | -4.05015300 | 2.09952200  | -2.35381000 |
| H  | -2.08400400 | 2.58207600  | -1.61179300 |
| C  | -4.51217000 | -0.24019200 | -2.66678800 |
| H  | -2.93825600 | -1.59874100 | -2.08511400 |
| C  | -4.92580700 | 1.08885000  | -2.74632500 |
| H  | -4.35524400 | 3.14311800  | -2.42654500 |
| H  | -5.18278100 | -1.03860900 | -2.98293400 |
| H  | -5.91971500 | 1.33458100  | -3.11615500 |
| Cu | 0.21141800  | -1.30436500 | -0.78165800 |
| H  | 0.72202400  | 1.28721200  | -1.85141600 |
| P  | 1.77509200  | 0.13385400  | 0.29575400  |
| C  | 2.28019400  | 1.88433200  | 0.18317900  |
| C  | 1.98972900  | 2.75040000  | 1.23738200  |
| C  | 2.89850100  | 2.38897800  | -0.96546200 |
| C  | 2.31144300  | 4.10182000  | 1.14693300  |
| H  | 1.53952800  | 2.34575500  | 2.14471600  |
| C  | 3.21071300  | 3.73988800  | -1.06006100 |
| H  | 3.15598300  | 1.71244300  | -1.78341300 |
| C  | 2.91559500  | 4.59894900  | -0.00384000 |
| H  | 2.09649600  | 4.76913300  | 1.98070500  |
| H  | 3.69342200  | 4.12428800  | -1.95737700 |
| H  | 3.16490800  | 5.65645300  | -0.07607000 |
| C  | 3.36353500  | -0.68546700 | -0.09170600 |
| C  | 3.43645700  | -1.62644300 | -1.11529300 |
| C  | 4.51225700  | -0.35736400 | 0.63583200  |
| C  | 4.64951800  | -2.23430500 | -1.42284000 |
| H  | 2.52294800  | -1.90320400 | -1.64260700 |

|   |             |             |             |
|---|-------------|-------------|-------------|
| C | 5.71973800  | -0.97507600 | 0.33821600  |
| H | 4.45301200  | 0.38044700  | 1.43688400  |
| C | 5.78842500  | -1.90937300 | -0.69472500 |
| H | 4.69956500  | -2.97183100 | -2.22167700 |
| H | 6.61317300  | -0.72610900 | 0.90908800  |
| H | 6.73786900  | -2.38915400 | -0.92839400 |
| O | 1.29577300  | -0.11613700 | 1.73544300  |
| N | -1.25095000 | 0.87367500  | 2.16414200  |
| N | -3.17773400 | -0.35836200 | 1.66576600  |
| N | -1.18345600 | -1.42064200 | 2.23574400  |
| H | -0.16215200 | -1.30933600 | 2.22140200  |
| C | -1.87691300 | -0.30339700 | 1.99879700  |
| C | -1.84310200 | 2.10185500  | 1.66927100  |
| H | -1.68701700 | 2.19403400  | 0.58196400  |
| H | -1.33317700 | 2.94232200  | 2.15440500  |
| C | -3.31963500 | 2.08447000  | 2.00964400  |
| H | -3.43741200 | 2.09056800  | 3.10240900  |
| H | -3.82027600 | 2.97568000  | 1.61203000  |
| C | -3.96499600 | 0.84830600  | 1.41578800  |
| H | -4.96477800 | 0.68478300  | 1.84457300  |
| H | -4.08502600 | 0.96335400  | 0.32615700  |
| H | -4.37152800 | -1.37515100 | 0.31094500  |
| H | -4.52511800 | -1.93319000 | 1.99478700  |
| C | -2.77336700 | -2.68158000 | 0.94826300  |
| H | -3.26606900 | -3.64852000 | 0.79562100  |
| H | -2.20064200 | -2.43503000 | 0.04154700  |
| H | -2.28096800 | -3.02436100 | 3.03769900  |
| H | -0.98182600 | -3.44590400 | 1.88230200  |
| C | -3.80504500 | -1.60912100 | 1.22563300  |
| C | -1.78718900 | -2.73699900 | 2.09556600  |
| H | -0.22346100 | 0.77624100  | 2.15048200  |

Cl 0.54121500 -3.35954400 -0.27875000

**TS'**<sub>B-C'</sub> E = -3727.317962

C -1.39995900 -2.47564000 -0.69773000  
C -0.23038400 -2.89361900 -0.91379600  
Cu 1.16957500 -1.69819900 -1.31221900  
P -1.09133800 0.37649600 0.02134600  
C -2.71311900 1.07201800 0.54496800  
C -3.69969600 1.35236300 -0.40499300  
C -3.01376800 1.22202400 1.90056300  
C -4.96075900 1.78000900 -0.00908200  
H -3.46990400 1.23103600 -1.46666800  
C -4.27482800 1.65551300 2.30056100  
C -5.25230400 1.92922300 1.34689000  
H -5.72350000 1.99631300 -0.75708900  
H -6.24149600 2.26340100 1.65833900  
C -0.33045200 1.90865500 -0.69890200  
C 0.56955200 1.71938600 -1.74843200  
C -0.53722200 3.20620600 -0.21548000  
C 1.25856500 2.79090300 -2.30888200  
H 0.75905400 0.70388800 -2.09939300  
C 0.13904300 4.28469800 -0.77974700  
H -1.24218200 3.37089600 0.60124300  
C 1.03871000 4.07784000 -1.82606000  
H 1.96823700 2.61359800 -3.11655200  
H -0.03636600 5.29328300 -0.40548000  
H 1.56460800 4.92416300 -2.26696900  
O -0.32663900 0.09590100 1.36917400  
N 2.05111900 -1.20561000 1.56573100  
N 4.12839200 -0.17348900 1.23092900  
N 2.17643100 1.07945700 1.45548100

|    |             |             |             |
|----|-------------|-------------|-------------|
| H  | 1.13854200  | 1.01421100  | 1.50613100  |
| C  | 2.79434700  | -0.10022700 | 1.39551200  |
| C  | 2.59298400  | -2.53472700 | 1.37245700  |
| H  | 2.53032000  | -2.81906100 | 0.30604900  |
| H  | 1.97729700  | -3.23985700 | 1.94388200  |
| C  | 4.03518200  | -2.54972600 | 1.83509700  |
| H  | 4.07684900  | -2.37779400 | 2.92038500  |
| H  | 4.49610200  | -3.52358600 | 1.63153300  |
| C  | 4.79920600  | -1.46377300 | 1.10585100  |
| H  | 5.80975800  | -1.34829200 | 1.52312000  |
| H  | 4.89121000  | -1.70455300 | 0.03344100  |
| H  | 5.58109600  | 0.62767000  | -0.00884500 |
| H  | 5.51018500  | 1.36164100  | 1.60933400  |
| C  | 3.99463000  | 2.06797600  | 0.21799000  |
| H  | 4.57522400  | 2.98066900  | 0.03819700  |
| H  | 3.57314900  | 1.72692100  | -0.73810100 |
| H  | 3.24662300  | 2.76073500  | 2.12979600  |
| H  | 2.13116100  | 3.03116900  | 0.77297500  |
| C  | 4.89684500  | 0.98540800  | 0.77387700  |
| C  | 2.86261900  | 2.32847200  | 1.19017800  |
| H  | 1.02730600  | -1.02398000 | 1.53391200  |
| Cl | 3.03129000  | -0.81683900 | -1.89693000 |
| C  | -2.76787200 | -2.21150300 | -0.46831400 |
| C  | -3.24902700 | -2.04328000 | 0.84453500  |
| C  | -3.67027200 | -2.17755400 | -1.54851000 |
| C  | -4.60247900 | -1.84890200 | 1.06419800  |
| C  | -5.02038900 | -1.97729200 | -1.31567900 |
| H  | -3.28624200 | -2.30471700 | -2.55895800 |
| C  | -5.48710100 | -1.81198400 | -0.01133500 |
| H  | -5.71598500 | -1.94598600 | -2.15215600 |
| H  | -6.54768600 | -1.64283200 | 0.16710500  |



|   |             |             |             |
|---|-------------|-------------|-------------|
| H | 0.05519600  | -3.94631100 | -0.94842000 |
| H | -2.53459500 | -2.02975900 | 1.66689500  |
| H | -4.96993900 | -1.69911600 | 2.07720300  |
| H | -2.23507800 | 0.98824100  | 2.62815900  |
| H | -4.49929100 | 1.78008900  | 3.36012000  |

**C** E = -3727.396271

|    |             |             |             |
|----|-------------|-------------|-------------|
| C  | -0.58362000 | 0.36594900  | 1.06574000  |
| C  | 0.55923100  | -0.36456400 | 1.07618100  |
| C  | 1.67914200  | 0.05430900  | 1.94929700  |
| C  | 1.79221100  | 1.32658500  | 2.53542900  |
| C  | 2.73976900  | -0.84181100 | 2.15907900  |
| C  | 2.90315000  | 1.68117000  | 3.29195800  |
| H  | 0.99500200  | 2.05749500  | 2.39070300  |
| C  | 3.84908800  | -0.49876300 | 2.92187100  |
| H  | 2.66215200  | -1.82827700 | 1.69611700  |
| C  | 3.94012100  | 0.77062900  | 3.48687000  |
| H  | 2.96355400  | 2.67613000  | 3.73267400  |
| H  | 4.64756800  | -1.22424400 | 3.07181500  |
| H  | 4.81235600  | 1.04982900  | 4.07610100  |
| Cu | 0.76453500  | -1.93124000 | 0.05923600  |
| H  | -0.78553200 | 1.21360700  | 1.73720000  |
| P  | -1.82974100 | 0.09340400  | -0.19195800 |
| C  | -2.83016400 | 1.61177800  | -0.11439800 |
| C  | -3.08866500 | 2.29184200  | -1.30544100 |
| C  | -3.30122500 | 2.13803100  | 1.09315400  |
| C  | -3.80477800 | 3.48600200  | -1.29098100 |
| H  | -2.72390800 | 1.86942900  | -2.24192100 |
| C  | -4.02123100 | 3.32701700  | 1.10630000  |
| H  | -3.11111900 | 1.60924500  | 2.02888400  |
| C  | -4.27033400 | 4.00283000  | -0.08637600 |

|   |             |             |             |
|---|-------------|-------------|-------------|
| H | -4.00501100 | 4.01089000  | -2.22384000 |
| H | -4.38962000 | 3.72874600  | 2.04892300  |
| H | -4.83368800 | 4.93465200  | -0.07480600 |
| C | -2.93656800 | -1.27964000 | 0.23306600  |
| C | -2.42177600 | -2.57918100 | 0.18058300  |
| C | -4.27801200 | -1.08675100 | 0.57258600  |
| C | -3.23580500 | -3.66646300 | 0.46529200  |
| H | -1.37624600 | -2.74049900 | -0.08626700 |
| C | -5.09001400 | -2.17888200 | 0.86163000  |
| H | -4.69958500 | -0.08284400 | 0.60196600  |
| C | -4.57090000 | -3.46806700 | 0.80817300  |
| H | -2.81981400 | -4.67096100 | 0.41375100  |
| H | -6.13519700 | -2.01998200 | 1.12276700  |
| H | -5.20855900 | -4.32193300 | 1.03253900  |
| O | -1.27440100 | -0.07228000 | -1.60063600 |
| N | 0.76920000  | 1.79884900  | -1.70351800 |
| N | 3.00085900  | 1.23232500  | -1.29319200 |
| N | 1.57730000  | -0.22816700 | -2.41980700 |
| H | 0.60142800  | -0.53490000 | -2.45721500 |
| C | 1.78760200  | 0.92844900  | -1.78171300 |
| C | 0.84246500  | 2.97439100  | -0.85594000 |
| H | 0.60877800  | 2.71331500  | 0.19039400  |
| H | 0.07853900  | 3.68224500  | -1.19911500 |
| C | 2.23780600  | 3.55326200  | -0.96852300 |
| H | 2.40966000  | 3.89441800  | -1.99924600 |
| H | 2.35479900  | 4.41847100  | -0.30560700 |
| C | 3.25119900  | 2.49081800  | -0.59321000 |
| H | 4.27130800  | 2.81122700  | -0.84961100 |
| H | 3.22587100  | 2.29231200  | 0.49316100  |
| H | 4.48612600  | 0.31947200  | -0.16981100 |
| H | 4.87501900  | 0.52115300  | -1.89336300 |

|    |             |             |             |
|----|-------------|-------------|-------------|
| C  | 3.57559300  | -1.16371500 | -1.44709100 |
| H  | 4.41988700  | -1.84918900 | -1.58029500 |
| H  | 2.97958200  | -1.52064300 | -0.59387200 |
| H  | 3.19708300  | -0.90014000 | -3.57281000 |
| H  | 2.21270500  | -2.16744100 | -2.77926500 |
| C  | 4.07552900  | 0.23986000  | -1.18851600 |
| C  | 2.65939100  | -1.17570300 | -2.65224800 |
| H  | -0.14734500 | 1.33928500  | -1.82861400 |
| Cl | 1.04219200  | -3.72676800 | -1.06092600 |

**TS<sub>C-D</sub>** E = -3727.360317

|    |             |             |             |
|----|-------------|-------------|-------------|
| C  | -1.50754500 | -1.11184300 | 0.21118100  |
| C  | -0.28971300 | -1.74122000 | 0.29284700  |
| C  | -0.23233400 | -3.19838000 | 0.32322300  |
| C  | -1.05201800 | -3.96829300 | 1.16296100  |
| C  | 0.70036500  | -3.86665700 | -0.48693100 |
| C  | -0.94509600 | -5.35400800 | 1.18368200  |
| H  | -1.76184800 | -3.45956700 | 1.81623000  |
| C  | 0.78393400  | -5.25056000 | -0.48875300 |
| H  | 1.34518600  | -3.26953100 | -1.13592200 |
| C  | -0.03467800 | -6.00228700 | 0.35321600  |
| H  | -1.58227300 | -5.93541700 | 1.84964100  |
| H  | 1.49923700  | -5.74801600 | -1.14252200 |
| H  | 0.04427600  | -7.08824300 | 0.36848400  |
| Cu | 0.04407300  | -0.87466300 | -1.37354100 |
| H  | -2.46708000 | -1.65986200 | 0.17895600  |
| P  | -1.64026800 | 0.62877900  | 0.68408900  |
| C  | -3.40887800 | 1.01901400  | 0.54923000  |
| C  | -3.94811200 | 1.90278000  | 1.48550200  |
| C  | -4.23390500 | 0.47600400  | -0.44010200 |
| C  | -5.29403000 | 2.24809200  | 1.42749500  |

|   |             |             |             |
|---|-------------|-------------|-------------|
| H | -3.29756400 | 2.29967900  | 2.26416800  |
| C | -5.57901800 | 0.82258500  | -0.49762600 |
| H | -3.83104800 | -0.23416900 | -1.16382000 |
| C | -6.10854100 | 1.71007100  | 0.43533300  |
| H | -5.71065300 | 2.93638500  | 2.16130100  |
| H | -6.21813000 | 0.39362800  | -1.26763600 |
| H | -7.16311900 | 1.97808400  | 0.39223000  |
| C | -0.82147700 | 1.60354900  | -0.62585200 |
| C | -1.16776100 | 1.48059800  | -1.97651600 |
| C | 0.14994000  | 2.53474300  | -0.25315300 |
| C | -0.55646300 | 2.27761500  | -2.93618700 |
| H | -1.92991800 | 0.76318900  | -2.28624400 |
| C | 0.77257600  | 3.32277300  | -1.21650500 |
| H | 0.39340200  | 2.63767600  | 0.80472900  |
| C | 0.41982000  | 3.19372300  | -2.55773100 |
| H | -0.81955500 | 2.16000700  | -3.98514100 |
| H | 1.52539600  | 4.05345700  | -0.91895600 |
| H | 0.90601100  | 3.81061500  | -3.31160100 |
| O | -1.08290600 | 1.01147700  | 2.02674700  |
| N | 1.88092200  | -0.34496900 | 1.68813600  |
| N | 3.42451900  | 1.40093000  | 1.55430100  |
| N | 2.87817300  | 0.13649000  | -0.32614800 |
| H | 2.20149700  | -0.48967400 | -0.76688700 |
| C | 2.71461100  | 0.40522900  | 0.97973900  |
| C | 1.60787500  | -0.10459400 | 3.09518400  |
| H | 2.26052700  | -0.74059700 | 3.71432300  |
| H | 0.56478400  | -0.39074700 | 3.26758200  |
| C | 1.80928300  | 1.36117400  | 3.41402100  |
| H | 1.01015600  | 1.92472200  | 2.91424300  |
| H | 1.72079800  | 1.54039400  | 4.49220600  |
| C | 3.17707100  | 1.80590800  | 2.93801500  |

|    |            |             |             |
|----|------------|-------------|-------------|
| H  | 3.26425900 | 2.90160300  | 2.97474800  |
| H  | 3.97317500 | 1.39490700  | 3.58125100  |
| H  | 5.21217500 | 2.44969200  | 1.46386100  |
| H  | 3.88496400 | 3.17380400  | 0.53602500  |
| C  | 4.84473200 | 1.50402600  | -0.45234200 |
| H  | 5.43298300 | 2.19465700  | -1.06777700 |
| H  | 5.49482200 | 0.66120000  | -0.17835000 |
| H  | 3.02008400 | 1.82147600  | -1.58434900 |
| H  | 3.92124700 | 0.38756800  | -2.08763900 |
| C  | 4.36874000 | 2.21581500  | 0.79817500  |
| C  | 3.64350100 | 0.98961400  | -1.21627400 |
| H  | 1.15596900 | -0.89315800 | 1.13684800  |
| Cl | 1.28098800 | -0.69011800 | -3.12280100 |

**D** E = -3727.396443

|    |             |             |             |
|----|-------------|-------------|-------------|
| C  | -0.29762700 | -1.15507600 | -0.70063700 |
| C  | 0.97480300  | -1.25946000 | -0.16384400 |
| C  | 2.00486000  | -2.22436700 | -0.56027300 |
| C  | 1.70376500  | -3.46151200 | -1.14266300 |
| C  | 3.34480600  | -1.86112600 | -0.35665700 |
| C  | 2.72657800  | -4.32057400 | -1.51906400 |
| H  | 0.66393100  | -3.76097400 | -1.27422100 |
| C  | 4.36248800  | -2.72284400 | -0.74421100 |
| H  | 3.55367400  | -0.88757900 | 0.09866800  |
| C  | 4.05622200  | -3.95077500 | -1.32479900 |
| H  | 2.48840900  | -5.28643800 | -1.96122900 |
| H  | 5.40101600  | -2.43467100 | -0.59238500 |
| H  | 4.85581400  | -4.62650400 | -1.62395800 |
| Cu | 0.94156000  | 0.10489500  | -1.61920900 |
| H  | -0.65998000 | -1.88701100 | -1.43221000 |
| P  | -1.53602500 | -0.15899800 | 0.17954200  |

|   |             |             |             |
|---|-------------|-------------|-------------|
| C | -2.47364900 | -1.36549000 | 1.15325700  |
| C | -2.38608500 | -1.27852500 | 2.54326300  |
| C | -3.20707800 | -2.39991300 | 0.56413400  |
| C | -3.03320600 | -2.21837800 | 3.33980100  |
| H | -1.81156800 | -0.46389600 | 2.98476400  |
| C | -3.85182600 | -3.33653900 | 1.36206900  |
| H | -3.28603500 | -2.46471100 | -0.52256600 |
| C | -3.76315500 | -3.24537500 | 2.74992600  |
| H | -2.96790600 | -2.14798600 | 4.42408400  |
| H | -4.42552400 | -4.13964700 | 0.90274700  |
| H | -4.26851300 | -3.98057500 | 3.37402600  |
| C | -2.65345300 | 0.45610400  | -1.10548500 |
| C | -4.02434400 | 0.57833100  | -0.85754100 |
| C | -2.13199900 | 0.92081700  | -2.31643300 |
| C | -4.85943500 | 1.14543100  | -1.81299500 |
| H | -4.44003000 | 0.22535600  | 0.08641000  |
| C | -2.96740000 | 1.48772100  | -3.27016900 |
| H | -1.06098600 | 0.85144500  | -2.51563400 |
| C | -4.33170100 | 1.59775800  | -3.01944700 |
| H | -5.92619000 | 1.23566300  | -1.61569400 |
| H | -2.54753200 | 1.84578000  | -4.20801500 |
| H | -4.98811500 | 2.04030500  | -3.76689800 |
| O | -0.90352600 | 0.89328600  | 1.03884100  |
| N | 2.78122900  | 0.84995700  | 1.44804900  |
| N | 1.32893500  | 2.49973000  | 2.35998600  |
| N | 1.97483200  | 2.52526800  | 0.11579400  |
| H | 2.49834900  | 2.06128400  | -0.61698500 |
| C | 2.03222300  | 1.90610000  | 1.33753400  |
| C | 2.88443200  | 0.27604900  | 2.77038300  |
| H | 3.65859300  | 0.79250300  | 3.37056400  |
| H | 3.22141200  | -0.76866200 | 2.67158900  |

|    |             |             |             |
|----|-------------|-------------|-------------|
| C  | 1.55634400  | 0.33513400  | 3.51030700  |
| H  | 0.80466300  | -0.23502800 | 2.94268100  |
| H  | 1.62447200  | -0.10333600 | 4.51527100  |
| C  | 1.10929200  | 1.77927200  | 3.60575200  |
| H  | 0.03341500  | 1.82859600  | 3.84238700  |
| H  | 1.64101400  | 2.29721400  | 4.42359700  |
| H  | 0.38611000  | 4.21891000  | 3.04250400  |
| H  | -0.62333100 | 3.16331600  | 2.01964700  |
| C  | 0.74561000  | 4.40865200  | 0.91587900  |
| H  | -0.05521900 | 5.13093200  | 0.71200000  |
| H  | 1.67594900  | 4.96832800  | 1.08890200  |
| H  | -0.01689800 | 2.95666000  | -0.48012800 |
| H  | 1.26228200  | 3.98764100  | -1.15919300 |
| C  | 0.38870200  | 3.58975800  | 2.13808800  |
| C  | 0.93982900  | 3.46391400  | -0.25210800 |
| H  | 1.24850700  | -0.60633800 | 0.67796100  |
| Cl | 1.72556500  | 1.43476200  | -3.05804000 |

**TS<sub>A-B'</sub>** E = -3727.327084

|   |             |            |             |
|---|-------------|------------|-------------|
| C | 0.97205600  | 1.09263300 | 0.33134300  |
| C | 0.03086100  | 1.88904800 | 0.47408200  |
| C | -1.10353700 | 2.74905400 | 0.58072600  |
| C | -2.17663900 | 2.38672800 | 1.41150400  |
| C | -1.22086100 | 3.90863800 | -0.20180000 |
| C | -3.33622900 | 3.14865700 | 1.44077000  |
| H | -2.09307400 | 1.47937600 | 2.01020700  |
| C | -2.37756600 | 4.67668700 | -0.15553000 |
| H | -0.39425800 | 4.18726100 | -0.85411400 |
| C | -3.44179300 | 4.29686600 | 0.65902200  |
| H | -4.16550300 | 2.84133300 | 2.07789300  |
| H | -2.45353100 | 5.57424600 | -0.76808100 |

|    |             |             |             |
|----|-------------|-------------|-------------|
| H  | -4.35215900 | 4.89370200  | 0.68222500  |
| Cu | 0.17820100  | -0.59669900 | -0.10205700 |
| Cl | 1.41784100  | -2.65705700 | -0.47997900 |
| H  | 2.71209800  | 0.98587500  | 0.56498200  |
| P  | -1.77532200 | -1.47950200 | -0.46295600 |
| C  | -2.88076600 | -0.56437300 | -1.57277000 |
| C  | -4.07694300 | -1.10159900 | -2.05808500 |
| C  | -2.53409200 | 0.74987300  | -1.88667200 |
| C  | -4.91555700 | -0.32326600 | -2.84510200 |
| H  | -4.34562900 | -2.12872900 | -1.80901500 |
| C  | -3.38693500 | 1.53809000  | -2.65401600 |
| H  | -1.58965600 | 1.14777100  | -1.50968200 |
| C  | -4.57528500 | 0.99857900  | -3.13458400 |
| H  | -5.84589500 | -0.74074400 | -3.22796200 |
| H  | -3.11906900 | 2.57172900  | -2.87027400 |
| H  | -5.24397300 | 1.60924900  | -3.74005400 |
| C  | -2.83761000 | -1.76872100 | 0.98499100  |
| C  | -2.59555000 | -2.89940100 | 1.76940500  |
| C  | -3.78498400 | -0.83148400 | 1.40595300  |
| C  | -3.30307700 | -3.09741700 | 2.94959000  |
| H  | -1.85378600 | -3.62683300 | 1.43889400  |
| C  | -4.48395300 | -1.02704500 | 2.59245800  |
| H  | -3.98203900 | 0.05290300  | 0.79799500  |
| C  | -4.24582100 | -2.16046500 | 3.36491800  |
| H  | -3.11519300 | -3.98596000 | 3.55064400  |
| H  | -5.22481900 | -0.29455600 | 2.91171100  |
| H  | -4.79535400 | -2.31421000 | 4.29251200  |
| O  | -1.67443800 | -2.97983900 | -1.11060600 |
| H  | -0.71914300 | -3.21022600 | -1.13989500 |
| N  | 3.76568600  | 1.04610100  | 0.70788900  |
| N  | 5.87794900  | 0.31619900  | 0.03994500  |



|   |            |             |             |
|---|------------|-------------|-------------|
| N | 3.96347200 | -0.87728200 | -0.52969100 |
| H | 2.96325800 | -1.06895400 | -0.38601300 |
| C | 4.53212900 | 0.16523500  | 0.07665000  |
| C | 4.30634700 | 2.21319000  | 1.36853400  |
| H | 4.55281800 | 1.98622200  | 2.41889100  |
| H | 3.51658800 | 2.97415900  | 1.37496200  |
| C | 5.54357800 | 2.68104100  | 0.62671600  |
| H | 5.25930100 | 3.01419800  | -0.38127100 |
| H | 6.01916400 | 3.52627400  | 1.13830100  |
| C | 6.52396500 | 1.52827500  | 0.53122200  |
| H | 7.34428900 | 1.76942600  | -0.16115500 |
| H | 6.98028000 | 1.32476200  | 1.51522700  |
| H | 7.63868900 | -0.77102200 | 0.19221000  |
| H | 7.13068200 | -0.42636800 | -1.47050900 |
| C | 6.06261700 | -2.06680300 | -0.54121200 |
| H | 6.69308200 | -2.78317500 | -1.08076800 |
| H | 5.90107400 | -2.45922900 | 0.47242700  |
| H | 4.86976000 | -1.60447500 | -2.28528500 |
| H | 4.11666600 | -2.80372400 | -1.21365000 |
| C | 6.76385900 | -0.72454100 | -0.47353200 |
| C | 4.72508500 | -1.89246700 | -1.23122800 |

**B'** E = -3727.343099

|   |             |            |             |
|---|-------------|------------|-------------|
| C | -0.48844200 | 0.73144500 | -0.11366700 |
| C | -1.20690800 | 1.72678800 | 0.01333000  |
| C | -2.15985600 | 2.78097500 | 0.11431500  |
| C | -2.19493500 | 3.83125500 | -0.81970600 |
| C | -3.15032300 | 2.74789000 | 1.11358900  |
| C | -3.19104100 | 4.79753800 | -0.76374300 |
| H | -1.42988900 | 3.86650600 | -1.59368600 |
| C | -4.14295300 | 3.71794400 | 1.16545800  |

|    |             |             |             |
|----|-------------|-------------|-------------|
| H  | -3.12277400 | 1.93865200  | 1.84377300  |
| C  | -4.17262100 | 4.74467100  | 0.22390400  |
| H  | -3.20245200 | 5.60143800  | -1.49869400 |
| H  | -4.89948700 | 3.67429600  | 1.94862500  |
| H  | -4.95126500 | 5.50453200  | 0.26504200  |
| Cu | 0.71094800  | -0.68216000 | -0.16562600 |
| Cl | 0.44028500  | -3.01459700 | -0.28976200 |
| H  | -2.42836900 | 0.25683200  | -0.80053800 |
| P  | 2.91494500  | -0.75556800 | -0.01687100 |
| C  | 3.56606200  | 0.03702900  | 1.48542700  |
| C  | 4.86291500  | -0.20498900 | 1.94742400  |
| C  | 2.73208100  | 0.90932200  | 2.18526800  |
| C  | 5.31757500  | 0.42276000  | 3.09929100  |
| H  | 5.50770000  | -0.89164300 | 1.39794200  |
| C  | 3.19443300  | 1.54911600  | 3.33228700  |
| H  | 1.71685200  | 1.08014600  | 1.81956400  |
| C  | 4.48428300  | 1.30307200  | 3.78949500  |
| H  | 6.32637000  | 0.23128200  | 3.46252200  |
| H  | 2.54263300  | 2.23308700  | 3.87366300  |
| H  | 4.84541300  | 1.79686600  | 4.69072800  |
| C  | 3.97669700  | -0.01967500 | -1.29710300 |
| C  | 4.74831500  | -0.81038100 | -2.14806600 |
| C  | 3.96028400  | 1.36781900  | -1.46866200 |
| C  | 5.50786200  | -0.21570600 | -3.15216100 |
| H  | 4.75392500  | -1.89035200 | -2.01110600 |
| C  | 4.71648900  | 1.95719900  | -2.47306100 |
| H  | 3.35090900  | 1.98699400  | -0.80680200 |
| C  | 5.49356300  | 1.16519300  | -3.31626100 |
| H  | 6.11510900  | -0.83667500 | -3.80966900 |
| H  | 4.70231600  | 3.03879600  | -2.59956000 |
| H  | 6.08651100  | 1.62770500  | -4.10405100 |

|   |             |             |             |
|---|-------------|-------------|-------------|
| O | 3.50385900  | -2.28216900 | 0.05940800  |
| H | 2.72977900  | -2.88419000 | -0.00266700 |
| N | -3.35457400 | -0.18721900 | -0.90837500 |
| N | -4.79164300 | -1.82312200 | -0.07991500 |
| N | -2.50706800 | -1.92059000 | 0.34693000  |
| H | -1.55921900 | -1.59239500 | 0.12112400  |
| C | -3.54914400 | -1.30966200 | -0.21278000 |
| C | -4.44280700 | 0.58252700  | -1.48454800 |
| H | -4.63066300 | 0.26290600  | -2.52192900 |
| H | -4.12702500 | 1.63280300  | -1.50824300 |
| C | -5.68341100 | 0.39900000  | -0.63426800 |
| H | -5.50800800 | 0.84557900  | 0.35530800  |
| H | -6.54464400 | 0.90744000  | -1.08291200 |
| C | -5.97701300 | -1.08106600 | -0.49719000 |
| H | -6.75647600 | -1.25697400 | 0.25888500  |
| H | -6.34876500 | -1.49556000 | -1.44971700 |
| H | -5.79647300 | -3.63647300 | -0.16179300 |
| H | -5.44378600 | -3.06400800 | 1.47868600  |
| C | -3.75326800 | -3.98114600 | 0.47890600  |
| H | -3.91978000 | -4.90512900 | 1.04453800  |
| H | -3.46789400 | -4.26176900 | -0.54448000 |
| H | -2.85420500 | -2.94375800 | 2.15353300  |
| H | -1.66722000 | -3.66253000 | 1.03075500  |
| C | -5.02597100 | -3.15967900 | 0.46235800  |
| C | -2.63911900 | -3.16027300 | 1.09476100  |

**TS<sub>B'</sub>** E = -3727.299332

|    |             |             |             |
|----|-------------|-------------|-------------|
| Cu | 0.38873200  | -1.61366300 | 0.67741400  |
| Cl | -1.33917300 | -2.74769900 | 1.14584200  |
| H  | -2.49695100 | 1.58607300  | -1.03024900 |
| P  | 0.11834200  | 1.27429200  | -0.57459600 |

|   |             |             |             |
|---|-------------|-------------|-------------|
| C | 1.60548400  | 2.33412600  | -1.04118100 |
| C | 1.68773600  | 2.93759900  | -2.29604100 |
| C | 2.64895000  | 2.53705300  | -0.13183100 |
| C | 2.79329800  | 3.71243700  | -2.64137300 |
| H | 0.86549300  | 2.79206800  | -2.99247500 |
| C | 3.74281200  | 3.32775500  | -0.46394000 |
| H | 2.60285200  | 2.07117900  | 0.85477400  |
| C | 3.82090900  | 3.91245800  | -1.72658600 |
| H | 2.84783100  | 4.16814700  | -3.62974000 |
| H | 4.53741000  | 3.48886800  | 0.26418700  |
| H | 4.68185300  | 4.52442400  | -1.99336600 |
| C | -0.37108900 | 2.05060800  | 1.01487800  |
| C | -0.74506300 | 1.26862800  | 2.10840300  |
| C | -0.50996400 | 3.43689900  | 1.08628800  |
| C | -1.23102900 | 1.86152500  | 3.26804100  |
| H | -0.65368500 | 0.18097500  | 2.03713700  |
| C | -1.00735600 | 4.03364500  | 2.24196600  |
| H | -0.22550100 | 4.04575700  | 0.22669900  |
| C | -1.36433300 | 3.24735400  | 3.33442100  |
| H | -1.50954300 | 1.24155700  | 4.11934400  |
| H | -1.11442200 | 5.11632700  | 2.29159500  |
| H | -1.74841800 | 3.71427200  | 4.24036100  |
| O | -0.78323100 | 1.71388500  | -1.76970400 |
| N | -3.27167800 | 0.98477600  | -0.70250200 |
| N | -3.96917900 | -1.24350300 | -0.71973800 |
| N | -2.43421100 | -0.43929600 | -2.29258400 |
| H | -1.72792200 | 0.31556400  | -2.40215200 |
| C | -3.22091900 | -0.24914900 | -1.22081600 |
| C | -3.93699700 | 1.27820100  | 0.55703400  |
| H | -4.93381100 | 1.70660300  | 0.36633100  |
| H | -3.33856700 | 2.03527400  | 1.08006200  |

|   |             |             |             |
|---|-------------|-------------|-------------|
| C | -4.04250800 | 0.01268700  | 1.38294800  |
| H | -3.03820100 | -0.30820900 | 1.69235300  |
| H | -4.63781900 | 0.18911700  | 2.28661600  |
| C | -4.66368500 | -1.09393300 | 0.55787500  |
| H | -4.56733300 | -2.05350900 | 1.08373300  |
| H | -5.73534800 | -0.91169000 | 0.37319500  |
| H | -4.96636200 | -2.98605200 | -1.24796900 |
| H | -3.31650800 | -3.21768400 | -0.60982200 |
| C | -3.38965800 | -2.60957400 | -2.68599100 |
| H | -3.19597600 | -3.64500600 | -2.98955000 |
| H | -4.11948800 | -2.18265100 | -3.38846700 |
| H | -1.34842400 | -2.24006400 | -2.07714600 |
| H | -1.71037700 | -1.72840100 | -3.74427600 |
| C | -3.93824100 | -2.59683600 | -1.27418100 |
| C | -2.11714900 | -1.78754900 | -2.72893100 |
| H | -0.68159100 | 0.06810400  | -0.32902100 |
| C | 1.46105600  | -0.04550300 | 0.08090300  |
| C | 2.20286000  | -1.04962000 | 0.20957000  |
| C | 3.36885500  | -1.87876000 | 0.31436600  |
| C | 3.24303300  | -3.23845600 | 0.62341600  |
| C | 4.64296500  | -1.33024600 | 0.11118400  |
| C | 4.37191900  | -4.03855500 | 0.72886200  |
| H | 2.24472900  | -3.65119600 | 0.77809200  |
| C | 5.76738300  | -2.13678300 | 0.21512900  |
| H | 4.72698800  | -0.27080100 | -0.12822100 |
| C | 5.63498200  | -3.48954600 | 0.52434500  |
| H | 4.26628600  | -5.09459200 | 0.97067300  |
| H | 6.75549000  | -1.70794100 | 0.05643900  |
| H | 6.52072400  | -4.11752100 | 0.60434300  |

## 7. Characterization Data

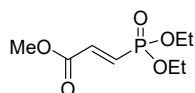

*Methyl (E)-3-(diethoxyphosphoryl)acrylate (3aa)*<sup>10</sup>. 81% yield. White solid. <sup>1</sup>H NMR (300 MHz, CDCl<sub>3</sub>): δ 6.96-6.65 (m, 2H), 4.18-4.08 (m, 4H), 3.80 (s, 3H), 1.34 (t, *J* = 7.1 Hz, 1H). <sup>13</sup>C NMR (75 MHz, CDCl<sub>3</sub>) δ 165.10 (d, *J* = 28.2 Hz), 136.94 (d, *J* = 7.0 Hz), 132.49 (d, *J* = 184.2 Hz), 62.65 (d, *J* = 5.7 Hz), 52.55, 16.51 (d, *J* = 6.3 Hz). <sup>31</sup>P NMR (121 MHz, CDCl<sub>3</sub>) δ 14.36. HRMS (ESI-TOF, *m/z*): HRMS (ESI) Calcd for [M+H]<sup>+</sup> 223.0730; Found 223.0738.

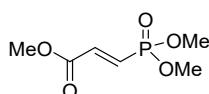

*Methyl (E)-3-(dimethoxyphosphoryl)acrylate (3ab)*<sup>11</sup>. 49% yield. Light yellow oil. <sup>1</sup>H NMR (300 MHz, CDCl<sub>3</sub>) δ 6.93-6.67 (m, 2H), 3.80 (d, *J*<sub>P-H</sub> = 5.3 Hz, 6H), 3.75 (s, 3H). <sup>13</sup>C NMR (75 MHz, CDCl<sub>3</sub>) δ 164.90 (d, *J* = 28.4 Hz), 137.81 (d, *J* = 7.1 Hz), 130.99 (d, *J* = 184.9 Hz), 53.02 (d, *J* = 5.8 Hz), 52.61. <sup>31</sup>P NMR (121 MHz, CDCl<sub>3</sub>) δ 17.24. HRMS (ESI-TOF, *m/z*): HRMS (ESI) Calcd for [M+H]<sup>+</sup> 195.0417; Found 195.0416.

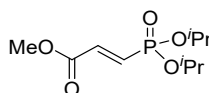

*Methyl (E)-3-(diisopropoxyphosphoryl)acrylate (3ac)*<sup>12</sup>. 82% yield. White solid. <sup>1</sup>H NMR (300 MHz, CDCl<sub>3</sub>) δ 6.95-6.61 (m, 2H), 4.77-4.63 (m, 2H), 3.79 (s, 3H), 1.32 (dd, *J* = 11.4, 6.2 Hz, 12H). <sup>13</sup>C NMR (75 MHz, CDCl<sub>3</sub>) δ 165.27 (d, *J* = 28.2 Hz), 136.03 (d, *J* = 7.0 Hz), 133.99 (d, *J* = 185.0 Hz), 71.57 (d, *J* = 5.9 Hz), 52.46, 24.12 (dd, *J* = 7.3, 4.5 Hz). <sup>31</sup>P NMR (121 MHz, CDCl<sub>3</sub>) δ 12.06. HRMS (ESI-TOF, *m/z*): HRMS (ESI) Calcd for [M+H]<sup>+</sup> 251.1043; Found 251.1047.

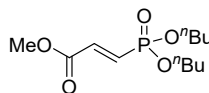

*Methyl (E)-3-(dibutoxyphosphoryl)acrylate (3ad)*<sup>13</sup>. 80% yield. Yellow oil. <sup>1</sup>H NMR (300 MHz, CDCl<sub>3</sub>) δ 6.94-6.63 (m, 2 H), 4.03 (dd, *J* = 6.8 Hz, 4H), 3.79 (s, 3H), 1.64 (dt, *J* = 14.5, 6.7 Hz, 4H), 1.44-1.32 (m, 4H), 0.91 (t, *J* = 7.4 Hz, 6H). <sup>13</sup>C NMR (75 MHz, CDCl<sub>3</sub>) δ 165.08 (d, *J* = 28.1 Hz), 136.86 (d, *J* = 7.0 Hz), 132.38 (d, *J* = 184.4 Hz), 66.30 (d, *J* = 6.0 Hz), 52.51, 32.52 (d, *J* = 6.3 Hz), 18.79, 13.67. <sup>31</sup>P NMR (121 MHz, CDCl<sub>3</sub>) δ 14.44. HRMS (ESI-TOF, *m/z*): HRMS (ESI)

Calcd for [M+H]<sup>+</sup> 279.1356; Found 279.1366.

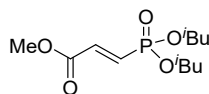

*Methyl (E)-3-(diisobutoxyphosphoryl)acrylate (3ae)*. 75% yield. Yellow oil. <sup>1</sup>H NMR (300 MHz, CDCl<sub>3</sub>) δ 6.96 – 6.64 (m, 2H), 3.83 – 3.78 (m, 7H), 2.03 – 1.84 (m, 2H), 0.93 (d, *J* = 6.7 Hz, 12H). <sup>13</sup>C NMR (75 MHz, CDCl<sub>3</sub>) δ 165.09 (d, *J* = 28.2 Hz), 136.94 (d, *J* = 7.1 Hz), 132.23 (d, *J* = 185.1 Hz), 72.43 (d, *J* = 6.3 Hz), 52.53, 29.28 (d, *J* = 6.6 Hz), 18.78. <sup>31</sup>P NMR (121 MHz, CDCl<sub>3</sub>) δ 14.32. HRMS (ESI-TOF, *m/z*): HRMS (ESI) Calcd for [M+H]<sup>+</sup> 279.1356; Found 279.1359.

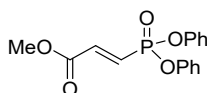

*Methyl (E)-3-(diphenoxyphosphoryl)acrylate (3af)*. 83% yield. Yellow oil. <sup>1</sup>H NMR (300 MHz, CDCl<sub>3</sub>) δ 7.34-7.32 (m, 4H), 7.22-7.17 (m, 6H), 7.13-6.85 (m, 2H), 3.81 (s, 3H). <sup>13</sup>C NMR (75 MHz, CDCl<sub>3</sub>) δ 164.52 (d, *J* = 29.9 Hz), 149.83 (d, *J* = 7.8 Hz), 139.36 (d, *J* = 7.7 Hz), 130.69 (d, *J* = 186.8 Hz), 130.03 (d, *J* = 0.7 Hz), 125.68 (d, *J* = 1.2 Hz), 120.57 (d, *J* = 4.6 Hz), 52.70. <sup>31</sup>P NMR (121 MHz, CDCl<sub>3</sub>) δ 7.26. HRMS (ESI-TOF, *m/z*): HRMS (ESI) Calcd for [M+H]<sup>+</sup> 319.0730; Found 319.0737.

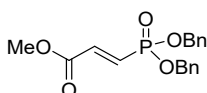

*Methyl (E)-3-(bis(benzyloxy)phosphoryl)acrylate (3ag)*. 61% yield. Yellow oil. <sup>1</sup>H NMR (300 MHz, CDCl<sub>3</sub>) δ 7.34 (m, 10H), 6.92-6.60 (m, 2H), 5.10-4.99 (m, 4H), 3.76 (s, 3H). <sup>13</sup>C NMR (75 MHz, CDCl<sub>3</sub>) δ 164.80 (d, *J* = 28.8 Hz), 137.05 (d, *J* = 7.2 Hz), 135.66 (d, *J* = 6.3 Hz), 131.87 (d, *J* = 185.7 Hz), 128.71, 128.14, 68.01 (d, *J* = 5.7 Hz), 52.45. <sup>31</sup>P NMR (121 MHz, CDCl<sub>3</sub>) δ 15.47. HRMS (ESI-TOF, *m/z*): HRMS (ESI) Calcd for [M+H]<sup>+</sup> 347.1043; Found 347.1045.

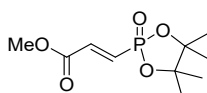

*Methyl (E)-3-(4,4,5,5-tetramethyl-2-oxido-1,3,2-dioxaphospholan-2-yl)acrylate (3ah)*<sup>14</sup>. 91% yield. Colorless oil. <sup>1</sup>H NMR (300 MHz, CDCl<sub>3</sub>) δ 6.93-6.70 (m, 2H), 3.78 (s, 3H), 1.50 (s, 3H), 1.36 (s, 3H). <sup>13</sup>C NMR (75 MHz, CDCl<sub>3</sub>) δ 164.90 (d, *J* = 28.8 Hz), 138.12 (d, *J* = 6.9 Hz),

132.57 (d,  $J = 179.4$  Hz), 89.37, 52.56, 24.77 (d,  $J = 4.0$  Hz), 24.12 (d,  $J = 5.4$  Hz).  $^{31}\text{P}$  NMR (121 MHz,  $\text{CDCl}_3$ )  $\delta$  25.44. HRMS (ESI-TOF,  $m/z$ ): HRMS (ESI) Calcd for  $[\text{M}+\text{H}]^+$  249.0886; Found 249.0893.

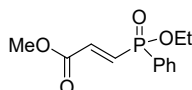

*Methyl (E)-3-(ethoxy(phenyl)phosphoryl)acrylate (3ai)*<sup>15</sup>. 81% yield. Light yellow Oil.  $^1\text{H}$  NMR (300 MHz,  $\text{CDCl}_3$ )  $\delta$  7.79-7.72 (m, 2H), 7.59-7.53 (m, 1H), 7.50-7.43 (m, 2H), 7.09 (dd,  $J_{\text{P-H}} = 20.0$  Hz,  $J_{\text{H-H}} = 17.1$  Hz, 1H), 6.67 (dd,  $J_{\text{P-H}} = 18.8$  Hz,  $J_{\text{H-H}} = 17.1$  Hz, 1H), 4.17-3.95 (m, 2H), 3.74 (s, 3H), 1.32 (t,  $J = 7.1$  Hz, 1H).  $^{13}\text{C}$  NMR (75 MHz,  $\text{CDCl}_3$ )  $\delta$  165.03 (d,  $J = 24.2$  Hz), 136.31 (d,  $J = 6.4$  Hz), 136.08 (d,  $J = 129.4$  Hz), 133.07 (d,  $J = 2.8$  Hz), 131.68 (d,  $J = 10.4$  Hz), 129.18 (d,  $J = 139.2$  Hz), 128.91 (d,  $J = 13.4$  Hz), 52.44, 61.66 (d,  $J = 5.9$  Hz), 16.49 (d,  $J = 6.6$  Hz).  $^{31}\text{P}$  NMR (121 MHz,  $\text{CDCl}_3$ )  $\delta$  28.30. HRMS (ESI-TOF,  $m/z$ ): HRMS (ESI) Calcd for  $[\text{M}+\text{H}]^+$  255.0781; Found 255.0782.

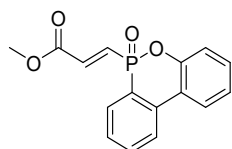

*Methyl (E)-3-(6-oxidodibenzo[*c,e*][1,2]oxaphosphinin-6-yl)acrylate (3aj)*. 91% yield. White solid.  $^1\text{H}$  NMR (300 MHz,  $\text{CDCl}_3$ )  $\delta$  8.04 – 7.92 (m, 2H), 7.88 – 7.70 (m, 1H), 7.74 (t,  $J_{\text{H-H}} = 7.8$  Hz, 1H), 7.58 – 7.48 (m, 1H), 7.40 (t,  $J_{\text{H-H}} = 7.7$  Hz, 1H), 7.31 – 7.22 (m, 2H), 7.13 (dd,  $J_{\text{P-H}} = 20.8$  Hz,  $J_{\text{H-H}} = 17.2$  Hz, 1H), 6.75 (dd,  $J_{\text{P-H}} = 20.1$  Hz,  $J_{\text{H-H}} = 17.2$  Hz, 1H), 3.77 (s, 3H).  $^{13}\text{C}$  NMR (75 MHz,  $\text{CDCl}_3$ )  $\delta$  164.73 (d,  $J = 25.6$  Hz), 148.77 (d,  $J = 8.1$  Hz), 137.60 (d,  $J = 7.1$  Hz), 136.09 (d,  $J = 6.4$  Hz), 134.17 (d,  $J = 131.4$  Hz), 134.05 (d,  $J = 2.4$  Hz), 130.98, 130.89 (d,  $J = 11.4$  Hz), 128.78 (d,  $J = 14.0$  Hz), 125.26, 125.09, 124.05 (d,  $J = 10.1$  Hz), 122.83 (d,  $J = 146.6$  Hz), 122.04 (d,  $J = 3.7$  Hz), 120.59 (d,  $J = 6.5$  Hz), 52.64.  $^{31}\text{P}$  NMR (121 MHz,  $\text{CDCl}_3$ )  $\delta$  21.16. HRMS (ESI-TOF,  $m/z$ ): HRMS (ESI) Calcd for  $[\text{M}+\text{H}]^+$  301.0624; Found 301.0631.

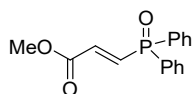

*Methyl (E)-3-(diphenylphosphoryl)acrylate (3ak)*<sup>15</sup>. 92% yield. White solid.  $^1\text{H}$  NMR (300 MHz,  $\text{CDCl}_3$ )  $\delta$  7.67-7.56 (m, 4H), 7.52-7.38 (m, 4H), 6.76 (t,  $J = 17.3$  Hz, 1H), 3.71 (s, 3H).  $^{13}\text{C}$



NMR (75 MHz, CDCl<sub>3</sub>)  $\delta$  164.87 (d,  $J$  = 21.3 Hz), 138.11 (d,  $J$  = 93.9 Hz), 136.33 (d,  $J$  = 4.2 Hz), 132.40 (d,  $J$  = 2.8 Hz), 131.21 (d,  $J$  = 10.1 Hz), 130.98 (d,  $J$  = 106.5 Hz), 128.79 (d,  $J$  = 12.4 Hz), 52.35. <sup>31</sup>P NMR (121 MHz, CDCl<sub>3</sub>)  $\delta$  22.06. HRMS (ESI-TOF,  $m/z$ ): HRMS (ESI) Calcd for [M+H]<sup>+</sup> 287.0832; Found 287.0834.

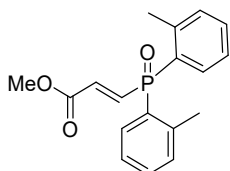

*Methyl (E)-3-(di-*o*-tolylphosphoryl)acrylate (3al)*. 63% yield. White solid. <sup>1</sup>H NMR (300 MHz, CDCl<sub>3</sub>)  $\delta$  7.72 – 7.52 (m, 3H), 7.45 (dd,  $J_{\text{H-H}} = J_{\text{H-H}} = 7.5$  Hz, 2H), 7.30 – 7.25 (m, 4H), 6.88 (dd,  $J_{\text{P-H}} = J_{\text{H-H}} = 17.2$  Hz, 1H), 3.81 (s, 3H), 2.39 (s, 6H). <sup>13</sup>C NMR (75 MHz, CDCl<sub>3</sub>)  $\delta$  165.19 (d,  $J$  = 21.1 Hz), 142.01 (d,  $J$  = 9.0 Hz), 138.70 (d,  $J$  = 93.0 Hz), 136.50 (d,  $J$  = 4.3 Hz), 132.44 (d,  $J$  = 5.0 Hz), 132.34 (d,  $J$  = 14.1 Hz), 131.98 (d,  $J$  = 10.9 Hz), 129.97 (d,  $J$  = 104.9 Hz), 125.99 (d,  $J$  = 12.7 Hz), 52.43, 21.42 (d,  $J$  = 4.6 Hz). <sup>31</sup>P NMR (121 MHz, CDCl<sub>3</sub>)  $\delta$  24.70. HRMS (ESI-TOF,  $m/z$ ): HRMS (ESI) Calcd for [M+H]<sup>+</sup> 315.1145; Found 315.1153.

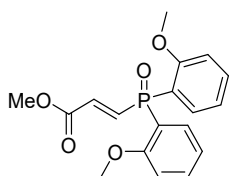

*Methyl (E)-3-(bis(2-methoxyphenyl)phosphoryl)acrylate (3am)*. 86% yield. White solid. <sup>1</sup>H NMR (300 MHz, Chloroform-*d*)  $\delta$  7.71 (dd,  $J_{\text{P-H}} = 23.9$ ,  $J_{\text{H-H}} = 17.2$  Hz, 1H), 7.58 (dd,  $J_{\text{P-H}} = 14.2$ ,  $J_{\text{H-H}} = 6.8$  Hz, 2H), 7.42 (t,  $J_{\text{H-H}} = 7.7$  Hz, 2H), 6.98 – 6.80 (m, 6H), 3.70 (s, 3H), 3.60 (s, 6H). <sup>13</sup>C NMR (75 MHz, CDCl<sub>3</sub>)  $\delta$  165.75 (d,  $J$  = 22.8 Hz), 160.50 (d,  $J$  = 3.2 Hz), 140.33 (d,  $J$  = 98.7 Hz), 134.44 (d,  $J$  = 3.9 Hz), 133.95 (d,  $J$  = 1.8 Hz), 133.51 (d,  $J$  = 7.7 Hz), 120.75 (d,  $J$  = 12.4 Hz), 119.78 (d,  $J$  = 110.4 Hz), 111.05 (d,  $J$  = 6.7 Hz), 55.47, 52.05. <sup>31</sup>P NMR (121 MHz, CDCl<sub>3</sub>)  $\delta$  17.85. HRMS (ESI-TOF,  $m/z$ ): HRMS (ESI) Calcd for [M+H]<sup>+</sup> 347.1043; Found 347.1048.

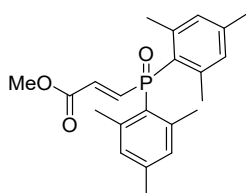

*Methyl (E)-3-(dimesitylphosphoryl)acrylate (3an)*<sup>16</sup>. 55% yield. White solid. <sup>1</sup>H NMR (300

MHz, CDCl<sub>3</sub>) δ 7.67 (dd,  $J_{P-H} = 24.5$ ,  $J_{H-H} = 17.0$  Hz, 1H), 6.89 (dd,  $J_{P-H} = J_{H-H} = 17.0$  Hz, 1H), 6.80 (d,  $J_{P-H} = 3.9$  Hz, 4H), 3.74 (s, 3H), 2.28 (s, 12H), 2.23 (s, 6H). <sup>13</sup>C NMR (75 MHz, CDCl<sub>3</sub>) δ 165.91 (d,  $J = 21.0$  Hz), 142.95 (d,  $J = 86.2$  Hz), 141.46 (d,  $J = 2.7$  Hz), 141.05 (d,  $J = 10.4$  Hz), 132.18 (d,  $J = 4.0$  Hz), 131.07 (d,  $J = 11.5$  Hz), 128.42 (d,  $J = 104.4$  Hz), 52.21, 22.89 (d,  $J = 4.9$  Hz), 21.02 (d,  $J = 1.1$  Hz). <sup>31</sup>P NMR (121 MHz, CDCl<sub>3</sub>) δ 23.84. HRMS (ESI-TOF, m/z): HRMS (ESI) Calcd for [M+H]<sup>+</sup> 371.1771; Found 371.1777.

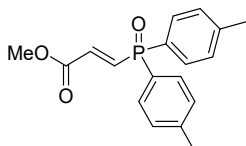

*Methyl (E)-3-(di-p-tolylphosphoryl)acrylate (3ao)*. 96% yield. White solid. <sup>1</sup>H NMR (300 MHz, CDCl<sub>3</sub>) δ 7.61 – 7.46 (m, 5H), 7.29 (dd,  $J_{H-H} = 7.9$ ,  $J_{H-H} = 2.5$  Hz, 4H), 6.78 (dd,  $J_{P-H} = J_{H-H} = 17.2$  Hz, 1H), 3.79 (s, 3H), 2.40 (s, 6H). <sup>13</sup>C NMR (75 MHz, CDCl<sub>3</sub>) δ 165.18 (d,  $J = 21.2$  Hz), 143.04 (d,  $J = 2.8$  Hz), 138.83 (d,  $J = 93.9$  Hz), 135.92 (d,  $J = 4.2$  Hz), 131.40 (d,  $J = 10.5$  Hz), 129.60 (d,  $J = 12.8$  Hz), 127.99 (d,  $J = 109.7$  Hz), 52.42, 21.71 (d,  $J = 1.1$  Hz). <sup>31</sup>P NMR (121 MHz, CDCl<sub>3</sub>) δ 22.46. HRMS (ESI-TOF, m/z): HRMS (ESI) Calcd for [M+H]<sup>+</sup> 315.1145; Found 315.1150.

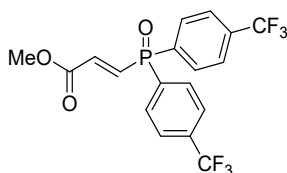

*Methyl (E)-3-(bis(4-(trifluoromethyl)phenyl)phosphoryl)acrylate (3ap)*. 79% yield. White solid. <sup>1</sup>H NMR (300 MHz, CDCl<sub>3</sub>) δ 7.87 – 7.75 (m, 8H), 7.53 (dd,  $J_{P-H} = 23.8$ ,  $J_{H-H} = 17.5$  Hz, 1H), 6.90 (dd,  $J_{P-H} = J_{H-H} = 17.5$  Hz, 1H), 3.80 (s, 3H). <sup>13</sup>C NMR (75 MHz, CDCl<sub>3</sub>) δ 164.59 (d,  $J_{P-C} = 21.8$  Hz), 138.34 (d,  $J_{P-C} = 4.0$  Hz), 136.08 (d,  $J_{P-C} = 95.5$  Hz), 135.03 (d,  $J_{P-C} = 105.3$  Hz), 134.66 (dq,  $J_{F-C} = 31.0$ ,  $J_{P-C} = 2.7$  Hz), 131.86 (d,  $J = 10.4$  Hz), 126.03 (dq,  $J = 12.2$ ,  $J = 3.5$  Hz), 123.38 (d,  $J_{F-C} = 272.7$  Hz), 52.75. <sup>31</sup>P NMR (121 MHz, CDCl<sub>3</sub>) δ 19.66. HRMS (ESI-TOF, m/z): HRMS (ESI) Calcd for [M+H]<sup>+</sup> 423.0579; Found 423.0583.

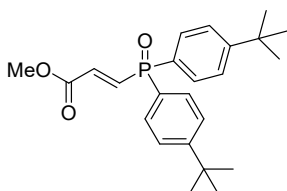

*Methyl (E)-3-(bis(4-(tert-butyl)phenyl)phosphoryl)acrylate (3aq)*. 76% yield. White solid.  $^1\text{H}$  NMR (300 MHz,  $\text{CDCl}_3$ )  $\delta$  7.64-7.44 (m, 9H), 6.76 (dd,  $J_{\text{P-H}} = J_{\text{H-H}} = 17.2$  Hz), 3.74 (s, 3H), 1.28 (s, 18H).  $^{13}\text{C}$  NMR (75 MHz,  $\text{CDCl}_3$ )  $\delta$  165.09 (d,  $J = 21.2$  Hz), 155.85 (d,  $J = 2.6$  Hz), 138.90 (d,  $J = 93.5$  Hz), 135.68 (d,  $J = 4.1$  Hz), 131.20 (d,  $J = 10.4$  Hz), 127.89 (d,  $J = 109.6$  Hz), 125.79 (d,  $J = 12.6$  Hz), 52.33, 35.02, 31.05.  $^{31}\text{P}$  NMR (121 MHz,  $\text{CDCl}_3$ )  $\delta$  21.86. HRMS (ESI-TOF,  $m/z$ ): HRMS (ESI) Calcd for  $[\text{M}+\text{H}]^+$  399.2084; Found 399.2085.

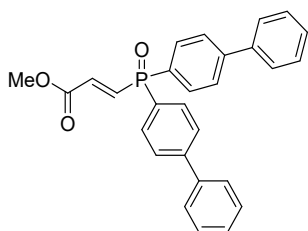

*Methyl (E)-3-(di([1,1'-biphenyl]-4-yl)phosphoryl)acrylate (3ar)*. 35% yield. White solid.  $^1\text{H}$  NMR (300 MHz,  $\text{CDCl}_3$ )  $\delta$  7.85 – 7.56 (m, 13H), 7.49-7.37 (m, 6H), 6.90 (dd,  $J_{\text{P-H}} = J_{\text{H-H}} = 17.3$  Hz, 1H), 3.82 (s, 3H).  $^{13}\text{C}$  NMR (75 MHz,  $\text{CDCl}_3$ )  $\delta$  165.15 (d,  $J = 21.3$  Hz), 145.40 (d,  $J = 2.7$  Hz), 139.77, 138.34 (d,  $J = 94.4$  Hz), 136.52 (d,  $J = 4.0$  Hz), 131.95 (d,  $J = 10.4$  Hz), 129.72 (d,  $J = 108.0$  Hz), 129.09, 128.41, 127.65 (d,  $J = 12.7$  Hz), 127.38, 52.55.  $^{31}\text{P}$  NMR (121 MHz,  $\text{CDCl}_3$ )  $\delta$  21.97. HRMS (ESI-TOF,  $m/z$ ): HRMS (ESI) Calcd for  $[\text{M}+\text{H}]^+$  439.1458; Found 439.1463.

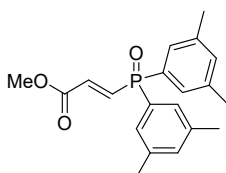

*Methyl (E)-3-(bis(3,5-dimethylphenyl)phosphoryl)acrylate (3as)*. 64% yield. White solid.  $^1\text{H}$  NMR (300 MHz,  $\text{CDCl}_3$ )  $\delta$  7.51 (dd,  $J_{\text{P-H}} = 22.0$ ,  $J_{\text{H-H}} = 17.2$  Hz, 1H), 7.26 (d,  $J_{\text{P-H}} = 12.7$  Hz, 4H), 7.13 (s, 2H), 6.77 (dd,  $J_{\text{H-H}} = 17.2$  Hz, 1H), 3.75 (s, 3H), 2.29 (s, 12H).  $^{13}\text{C}$  NMR (75 MHz,  $\text{CDCl}_3$ )  $\delta$  165.19 (d,  $J = 21.1$  Hz), 138.78 (d,  $J = 93.0$  Hz), 138.58 (d,  $J = 13.0$  Hz), 135.87 (d,  $J = 4.2$  Hz), 134.10 (d,  $J = 2.8$  Hz), 130.96 (d,  $J = 106.3$  Hz), 128.75 (d,  $J = 10.1$  Hz), 52.36, 21.28.  $^{31}\text{P}$  NMR (121 MHz,  $\text{CDCl}_3$ )  $\delta$  22.53. HRMS (ESI-TOF,  $m/z$ ): HRMS (ESI) Calcd for  $[\text{M}+\text{H}]^+$  343.1458; Found 343.1457.

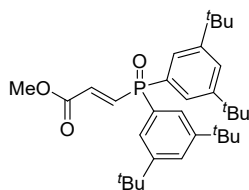

*Methyl (E)-3-(bis(3,5-di-tert-butylphenyl)phosphoryl)acrylate (3at)*. 84% yield. White solid.  $^1\text{H}$  NMR (300 MHz,  $\text{CDCl}_3$ )  $\delta$  7.59 – 7.45 (m, 7H), 6.82 (dd,  $J_{\text{P-H}} = J_{\text{H-H}} = 17.1$  Hz, 1H), 3.77 (s, 3H), 1.29 (s, 36H).  $^{13}\text{C}$  NMR (75 MHz,  $\text{CDCl}_3$ )  $\delta$  165.40 (d,  $J = 21.0$  Hz), 151.40 (d,  $J = 12.1$  Hz), 139.68 (d,  $J = 91.9$  Hz), 135.30 (d,  $J = 4.0$  Hz), 130.15 (d,  $J = 106.4$  Hz), 126.64 (d,  $J = 2.7$  Hz), 125.53 (d,  $J = 10.7$  Hz), 52.39, 35.16, 31.39.  $^{31}\text{P}$  NMR (121 MHz,  $\text{CDCl}_3$ )  $\delta$  23.84. HRMS (ESI-TOF,  $m/z$ ): HRMS (ESI) Calcd for  $[\text{M}+\text{H}]^+$  511.3336; Found 511.3344.

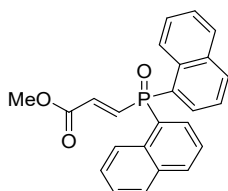

*Methyl (E)-3-(di(naphthalen-1-yl)phosphoryl)acrylate (3au)*. 74% yield. White solid.  $^1\text{H}$  NMR (300 MHz,  $\text{CDCl}_3$ )  $\delta$  8.47 (d,  $J = 7.6$  Hz, 1H), 7.91 (d,  $J = 8.2$  Hz, 2H), 7.78 – 7.65 (m, 5H), 7.40 – 7.32 (m, 6H), 6.90 (t,  $J_{\text{P-H}} = J_{\text{H-H}} = 17.4$  Hz, 1H), 3.64 (s, 3H).  $^{13}\text{C}$  NMR (75 MHz,  $\text{CDCl}_3$ )  $\delta$  165.01 (d,  $J = 21.5$  Hz), 139.24 (d,  $J = 94.7$  Hz), 136.84 (d,  $J = 4.5$  Hz), 133.83 (d,  $J = 10.1$  Hz), 133.74 (d,  $J = 3.3$  Hz), 133.17 (d,  $J = 8.8$  Hz), 132.82 (d,  $J = 11.2$  Hz), 129.07 (d,  $J = 0.9$  Hz), 127.93 (d,  $J = 105.1$  Hz), 127.64, 126.65, 126.51 (d,  $J = 5.6$  Hz), 124.66 (d,  $J = 14.4$  Hz), 52.37.  $^{31}\text{P}$  NMR (121 MHz,  $\text{CDCl}_3$ )  $\delta$  26.17. HRMS (ESI-TOF,  $m/z$ ): HRMS (ESI) Calcd for  $[\text{M}+\text{H}]^+$  387.1145; Found 387.1148.

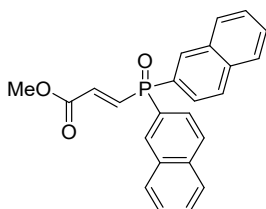

*Methyl (E)-3-(di(naphthalen-2-yl)phosphoryl)acrylate (3av)*. 74% yield. White solid.  $^1\text{H}$  NMR (300 MHz,  $\text{CDCl}_3$ )  $\delta$  8.37 (d,  $J = 14.3$  Hz, 2H), 7.93 – 7.71 (m, 13H), 6.94 (dd,  $J_{\text{P-H}} = J_{\text{H-H}} = 17.3$  Hz, 1H), 3.79 (s, 3H).  $^{13}\text{C}$  NMR (75 MHz,  $\text{CDCl}_3$ )  $\delta$  165.06 (d,  $J = 21.4$  Hz), 138.07 (d,  $J = 94.4$  Hz), 136.74 (d,  $J = 4.2$  Hz), 134.91 (d,  $J = 2.4$  Hz), 133.49 (d,  $J = 9.6$  Hz), 132.51 (d,  $J = 13.6$  Hz), 128.93, 128.78, 128.59, 128.13 (d,  $J = 107.8$  Hz), 127.93, 127.24, 125.84 (d,  $J = 11.1$  Hz),

52.49.  $^{31}\text{P}$  NMR (121 MHz,  $\text{CDCl}_3$ )  $\delta$  22.61. HRMS (ESI-TOF,  $m/z$ ): HRMS (ESI) Calcd for  $[\text{M}+\text{H}]^+$  387.1145; Found 387.1154.

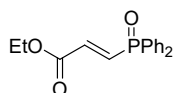

*Ethyl (E)-3-(diphenylphosphoryl)acrylate (3bk)*<sup>17</sup>. 72% yield. White solid.  $^1\text{H}$  NMR (300 MHz,  $\text{CDCl}_3$ )  $\delta$  7.70 – 7.63 (m, 4H), 7.57 – 7.42 (m, 7H), 6.76 (dd,  $J_{\text{P-H}} = J_{\text{H-H}} = 17.3$  Hz, 1H), 4.21 (q,  $J = 7.1$  Hz, 2H), 1.26 (t,  $J = 7.1$  Hz, 3H).  $^{13}\text{C}$  NMR (75 MHz,  $\text{CDCl}_3$ )  $\delta$  164.53 (d,  $J = 21.4$  Hz), 137.79 (d,  $J = 94.2$  Hz), 136.98 (d,  $J = 4.1$  Hz), 132.47 (d,  $J = 2.8$  Hz), 131.33 (d,  $J = 10.1$  Hz), 131.08 (d,  $J = 107.2$  Hz), 128.87 (d,  $J = 12.4$  Hz), 61.53, 14.14.  $^{31}\text{P}$  NMR (121 MHz,  $\text{CDCl}_3$ )  $\delta$  22.36. HRMS (ESI-TOF,  $m/z$ ): HRMS (ESI) Calcd for  $[\text{M}+\text{H}]^+$  301.0988; Found 301.0993.

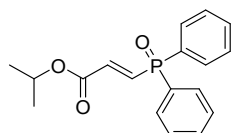

*Isopropyl (E)-3-(diphenylphosphoryl)acrylate (3ck)*<sup>18</sup>. 83% yield. White solid.  $^1\text{H}$  NMR (300 MHz,  $\text{CDCl}_3$ )  $\delta$  7.74 – 7.62 (m, 4H), 7.60 – 7.39 (m, 7H), 6.74 (dd,  $J_{\text{H-H}} = J_{\text{P-H}} = 17.3$  Hz, 1H), 5.07 (hept,  $J_{\text{H-H}} = 6.2$  Hz, 1H), 1.25 (d,  $J_{\text{H-H}} = 6.3$  Hz, 6H).  $^{13}\text{C}$  NMR (75 MHz,  $\text{CDCl}_3$ )  $\delta$  164.10 (d,  $J = 21.3$  Hz), 137.56 (d,  $J = 4.2$  Hz), 137.53 (d,  $J = 94.3$  Hz), 132.46 (d,  $J = 2.8$  Hz), 131.39 (d,  $J = 10.1$  Hz), 131.24 (d,  $J = 107.1$  Hz), 128.89 (d,  $J = 12.4$  Hz), 69.25, 21.80.  $^{31}\text{P}$  NMR (121 MHz,  $\text{CDCl}_3$ )  $\delta$  22.32. HRMS (ESI-TOF,  $m/z$ ): HRMS (ESI) Calcd for  $[\text{M}+\text{H}]^+$  315.1145; Found 315.1149.

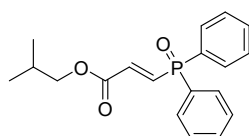

*Isobutyl (E)-3-(diphenylphosphoryl)acrylate (3dk)*. 79% yield. White solid.  $^1\text{H}$  NMR (300 MHz,  $\text{CDCl}_3$ )  $\delta$  7.73 – 7.64 (m, 4H), 7.60 – 7.42 (m, 7H), 6.83 (dd,  $J_{\text{P-H}} = J_{\text{H-H}} = 17.3$  Hz, 1H), 3.95 (d,  $J_{\text{H-H}} = 6.6$  Hz, 2H), 1.94 (m, 1H), 0.91 (d,  $J = 6.7$  Hz, 6H).  $^{13}\text{C}$  NMR (75 MHz,  $\text{CDCl}_3$ )  $\delta$  164.70 (d,  $J = 21.3$  Hz), 137.85 (d,  $J = 94.1$  Hz), 137.03 (d,  $J = 4.2$  Hz), 132.50 (d,  $J = 2.8$  Hz), 131.37 (d,  $J = 10.1$  Hz), 131.17 (d,  $J = 107.2$  Hz), 128.92 (d,  $J = 12.4$  Hz), 71.59, 27.71, 19.10.  $^{31}\text{P}$  NMR (121 MHz,  $\text{CDCl}_3$ )  $\delta$  22.24. HRMS (ESI-TOF,  $m/z$ ): HRMS (ESI) Calcd for  $[\text{M}+\text{H}]^+$  329.1301; Found 329.1306.

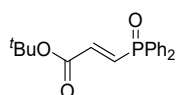

*tert-Butyl (E)-3-(diphenylphosphoryl)acrylate (3ek)*. 96% yield. White solid.  $^1\text{H}$  NMR (300 MHz,  $\text{CDCl}_3$ )  $\delta$  7.75-7.68 (m, 4H), 7.59-7.31 (m, 7H), 6.72 (dd,  $J_{\text{P-H}} = J_{\text{H-H}} = 17.3$  Hz, 1H), 1.49 (s, 9H).  $^{13}\text{C}$  NMR (75 MHz,  $\text{CDCl}_3$ )  $\delta$  163.69 (d,  $J = 21.3$  Hz), 138.99 (d,  $J = 4.1$  Hz), 136.48 (d,  $J = 94.8$  Hz), 132.38 (d,  $J = 2.8$  Hz), 131.33 (d,  $J = 10.1$  Hz), 131.27 (d,  $J = 107.0$  Hz), 128.83 (d,  $J = 12.4$  Hz), 82.08, 27.96.  $^{31}\text{P}$  NMR (121 MHz,  $\text{CDCl}_3$ )  $\delta$  22.53. HRMS (ESI-TOF,  $m/z$ ): HRMS (ESI) Calcd for  $[\text{M}+\text{H}]^+$  329.1301; Found 329.1303.

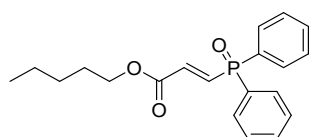

*Pentyl (E)-3-(diphenylphosphoryl)acrylate (3fk)*. 85% yield. White solid.  $^1\text{H}$  NMR (300 MHz,  $\text{CDCl}_3$ )  $\delta$  7.74 – 7.62 (m, 4H), 7.59 – 7.43 (m, 7H), 6.79 (t,  $J = 17.3$  Hz, 1H), 4.16 (t,  $J = 6.7$  Hz, 1H), 1.74 – 1.55 (m, 2H), 1.39 – 1.20 (m, 4H), 0.87 (d,  $J = 6.9$  Hz, 3H).  $^{13}\text{C}$  NMR (75 MHz, Chloroform- $d$ )  $\delta$  164.70 (d,  $J = 21.3$  Hz), 137.82 (d,  $J = 94.2$  Hz), 137.04 (d,  $J = 4.2$  Hz), 132.48 (d,  $J = 2.8$  Hz), 131.37 (d,  $J = 10.1$  Hz), 131.18 (d,  $J = 107.2$  Hz), 128.90 (d,  $J = 12.4$  Hz), 65.71, 28.11 (d,  $J = 14.7$  Hz), 22.32, 14.01.  $^{31}\text{P}$  NMR (121 MHz,  $\text{CDCl}_3$ )  $\delta$  22.26. HRMS (ESI-TOF,  $m/z$ ): HRMS (ESI) Calcd for  $[\text{M}+\text{H}]^+$  343.1458; Found 343.1465.

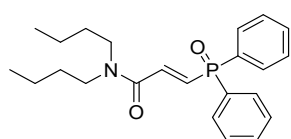

*(E)-N,N-Dibutyl-3-(diphenylphosphoryl)acrylamide (3gk)*. 81% yield. White solid.  $^1\text{H}$  NMR (300 MHz,  $\text{CDCl}_3$ )  $\delta$  7.77 – 7.65 (m, 4H), 7.64 – 7.23 (m, 8H), 3.48 – 3.19 (m, 4H), 1.66 – 1.46 (m, 4H), 1.41 – 1.19 (m, 4H), 0.99 – 0.75 (m, 6H).  $^{13}\text{C}$  NMR (75 MHz,  $\text{CDCl}_3$ )  $\delta$  163.62 (d,  $J = 18.3$  Hz), 136.84 (d,  $J = 4.4$  Hz), 134.70 (d,  $J = 97.0$  Hz), 132.25 (d,  $J = 2.7$  Hz), 131.96 (d,  $J = 108.7$  Hz), 131.31 (d,  $J = 10.1$  Hz), 128.80 (d,  $J = 12.3$  Hz), 48.08, 46.85, 32.02, 29.86, 20.32, 20.02, 13.94, 13.85.  $^{31}\text{P}$  NMR (121 MHz,  $\text{CDCl}_3$ )  $\delta$  22.95. HRMS (ESI-TOF,  $m/z$ ): HRMS (ESI) Calcd for  $[\text{M}+\text{H}]^+$  384.2087; Found 384.2092.

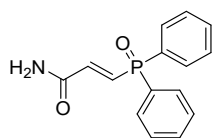

*(E)*-3-(Diphenylphosphoryl)acrylamide (**3hk**)<sup>19</sup>. 92% yield. White solid. <sup>1</sup>H NMR (300 MHz, *d*<sub>6</sub>-DMSO) δ 7.91 (s, 2H), 7.76 – 7.62 (m, 4H), 7.61 – 7.42 (m, 8H), 6.88 (dd, *J*<sub>H-H</sub> = 18.1 Hz, *J*<sub>P-H</sub> = 16.9 Hz, 1H). <sup>13</sup>C NMR (75 MHz, *d*<sub>6</sub>-DMSO) δ 164.31 (d, *J* = 19.0 Hz), 140.44 (d, *J* = 3.3 Hz), 133.15 (d, *J* = 95.0 Hz), 132.69 (d, *J* = 104.5 Hz), 132.15 (d, *J* = 2.6 Hz), 130.75 (d, *J* = 10.0 Hz), 128.94 (d, *J* = 12.0 Hz). <sup>31</sup>P NMR (121 MHz, *d*<sub>6</sub>-DMSO) δ 19.75. HRMS (ESI-TOF, *m/z*): HRMS (ESI) Calcd for [M+H]<sup>+</sup> 272.0835; Found 272.0834.

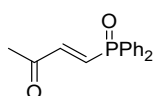

*(E)*-4-(Diphenylphosphoryl)but-3-en-2-one (**3ik**)<sup>20</sup>. 81% yield. White solid. <sup>1</sup>H NMR (300 MHz, CDCl<sub>3</sub>) δ 7.74-7.67 (m, 4H), 7.61-7.47 (m, 6H), 7.41-7.27 (m, 1H), 7.06 (dd, *J*<sub>P-H</sub> = *J*<sub>H-H</sub> = 17.6 Hz, 1H), 2.38 (s, 3H). <sup>13</sup>C NMR (75 MHz, CDCl<sub>3</sub>) δ 196.47 (d, *J* = 17.2 Hz), 142.88 (d, *J* = 2.2 Hz), 135.34 (d, *J* = 93.5 Hz), 132.62 (d, *J* = 2.8 Hz), 131.43 (d, *J* = 10.1 Hz), 131.19 (d, *J* = 107.1 Hz), 129.02 (d, *J* = 12.4 Hz), 29.11. <sup>31</sup>P NMR (121 MHz, CDCl<sub>3</sub>) δ 22.92. HRMS (ESI-TOF, *m/z*): HRMS (ESI) Calcd for [M+H]<sup>+</sup> 271.0882; Found 271.0887.

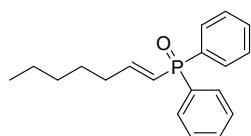

*(E)*-Hept-1-en-1-yl diphenylphosphine oxide (**3jk**)<sup>21</sup>. 91% yield. White solid. <sup>1</sup>H NMR (300 MHz, CDCl<sub>3</sub>) δ 7.71 – 7.62 (m, 4H), 7.53 – 7.35 (m, 6H), 6.71 (ddt, *J*<sub>P-H</sub> = 19.6 Hz, *J*<sub>H-H</sub> = 17.0 Hz, *J*<sub>H-H</sub> = 6.5 Hz, 1H), 6.20 (dd, *J*<sub>P-H</sub> = 24.7 Hz, *J*<sub>H-H</sub> = 17.0 Hz, 1H), 2.27 (q, *J* = 6.9 Hz, 2H), 1.45 (p, *J* = 6.9 Hz, 2H), 1.32 – 1.20 (m, 4H), 0.86 (t, *J* = 6.7 Hz, 3H). <sup>13</sup>C NMR (75 MHz, CDCl<sub>3</sub>) δ 153.07 (d, *J* = 2.0 Hz), 133.15 (d, *J* = 104.7 Hz), 131.74 (d, *J* = 2.7 Hz), 131.34 (d, *J* = 9.9 Hz), 128.55 (d, *J* = 12.0 Hz), 121.49 (d, *J* = 103.4 Hz), 34.55 (d, *J* = 16.8 Hz), 31.38, 27.60, 22.46, 14.06. <sup>31</sup>P NMR (121 MHz, CDCl<sub>3</sub>) δ 23.84. HRMS (ESI-TOF, *m/z*): HRMS (ESI) Calcd for [M+H]<sup>+</sup> 299.1559; Found 299.1561.

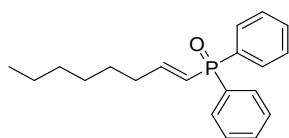

*(E)*-Oct-1-en-1-ylidiphenylphosphine oxide (**3kk**)<sup>22</sup>. 92% yield. White solid. <sup>1</sup>H NMR (300 MHz, CDCl<sub>3</sub>) δ 7.81 – 7.61 (m, 4H), 7.55 – 7.36 (m, 6H), 6.72 (ddt,  $J_{P-H} = 19.6$  Hz,  $J_{H-H} = 17.0$  Hz,  $J_{H-H} = 6.5$  Hz, 1H), 6.21 (ddt,  $J_{P-H} = 24.7$  Hz,  $J_{H-H} = 17.0$  Hz,  $J_{H-H} = 1.4$  Hz, 1H), 2.37 – 2.18 (m, 2H), 1.53 – 1.39 (m, 2H), 1.37 – 1.18 (m, 6H), 0.85 (t,  $J_{H-H} = 6.9$  Hz, 3H). <sup>13</sup>C NMR (75 MHz, CDCl<sub>3</sub>) δ 153.13 (d,  $J = 1.9$  Hz), 133.22 (d,  $J = 104.8$  Hz), 131.79 (d,  $J = 2.7$  Hz), 131.39 (d,  $J = 9.9$  Hz), 128.60 (d,  $J = 12.0$  Hz), 121.55 (d,  $J = 103.4$  Hz), 34.65 (d,  $J = 16.9$  Hz), 31.65, 28.92, 27.94 (d,  $J = 1.0$  Hz), 22.66, 14.16. <sup>31</sup>P NMR (121 MHz, CDCl<sub>3</sub>) δ 23.85. HRMS (ESI-TOF, m/z): HRMS (ESI) Calcd for [M+H]<sup>+</sup> 313.1716; Found 313.1718.

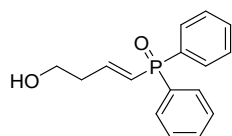

*(E)*-(4-Hydroxybut-1-en-1-yl)diphenylphosphine oxide (**3lk**)<sup>23</sup>. 75% yield. White solid. <sup>1</sup>H NMR (300 MHz, CDCl<sub>3</sub>) δ 7.72 – 7.62 (m, 6H), 7.54 – 7.38 (m, 7H), 6.72 (ddt,  $J_{P-H} = 19.6$ ,  $J_{H-H} = 17.1$  Hz,  $J_{H-H} = 6.7$  Hz, 1H), 6.33 (ddt,  $J_{P-H} = 24.7$  Hz,  $J_{H-H} = 17.1$  Hz,  $J_{H-H} = 1.3$  Hz, 1H), 3.77 – 3.65 (m, 2H), 3.40 (s, 1H), 2.53 (qt,  $J_{H-H} = 6.4$  Hz,  $J_{P-H} = 1.7$  Hz, 3H). <sup>13</sup>C NMR (75 MHz, CDCl<sub>3</sub>) δ 149.79 (d,  $J = 2.2$  Hz), 132.74 (d,  $J = 105.3$  Hz), 131.96 (d,  $J = 2.7$  Hz), 131.39 (d,  $J = 10.0$  Hz), 128.69 (d,  $J = 12.1$  Hz), 123.89 (d,  $J = 102.3$  Hz), 60.62, 37.94 (d,  $J = 16.7$  Hz). <sup>31</sup>P NMR (121 MHz, CDCl<sub>3</sub>) δ 24.14. HRMS (ESI-TOF, m/z): HRMS (ESI) Calcd for [M+H]<sup>+</sup> 273.1039; Found 273.1037.

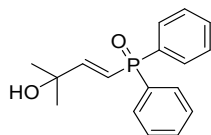

*(E)*-(3-Hydroxy-3-methylbut-1-en-1-yl)diphenylphosphine oxide (**3mk**)<sup>23</sup>. 87% yield. White solid. <sup>1</sup>H NMR (300 MHz, CDCl<sub>3</sub>) δ 7.69 – 7.60 (m, 4H), 7.51 – 7.35 (m, 6H), 6.81 (dd,  $J_{P-H} = 19.9$  Hz,  $J_{H-H} = 16.9$  Hz, 1H), 6.50 (dd,  $J_{P-H} = 24.9$  Hz,  $J_{H-H} = 16.9$  Hz, 1H), 3.40 (s, 1H), 1.32 (s, 6H). <sup>13</sup>C NMR (75 MHz, CDCl<sub>3</sub>) δ 158.89 (d,  $J = 1.8$  Hz), 132.95 (d,  $J = 105.4$  Hz), 131.84 (d,  $J = 2.7$  Hz), 131.34 (d,  $J = 10.0$  Hz), 128.62 (d,  $J = 12.1$  Hz), 117.58 (d,  $J = 102.6$  Hz), 71.72 (d,  $J = 15.5$  Hz), 29.34 (d,  $J = 1.5$  Hz). <sup>31</sup>P NMR (121 MHz, CDCl<sub>3</sub>) δ 24.32. HRMS (ESI-TOF, m/z): HRMS



(ESI) Calcd for  $[M+H]^+$  287.1195; Found 287.1199.

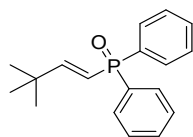

*(E)*-(3,3-Dimethylbut-1-en-1-yl)diphenylphosphine oxide (**3nk**)<sup>24</sup>. 85% yield. White solid. <sup>1</sup>H NMR (300 MHz, CDCl<sub>3</sub>) δ 7.74 – 7.60 (m, 4H), 7.55 – 7.37 (m, 6H), 6.75 (dd,  $J_{P-H} = 20.4$  Hz,  $J_{H-H} = 17.3$  Hz, 1H), 6.09 (dd,  $J_{P-H} = 24.5$ ,  $J_{H-H} = 17.3$  Hz, 1H), 1.08 (s, 9H). <sup>13</sup>C NMR (75 MHz, CDCl<sub>3</sub>) δ 162.38 (d,  $J = 1.2$  Hz), 133.36 (d,  $J = 104.6$  Hz), 131.73 (d,  $J = 2.7$  Hz), 131.35 (d,  $J = 9.8$  Hz), 128.58 (d,  $J = 12.0$  Hz), 116.40 (d,  $J = 103.4$  Hz), 35.37 (d,  $J = 14.9$  Hz), 28.71. <sup>31</sup>P NMR (121 MHz, CDCl<sub>3</sub>) δ 24.25. HRMS (ESI-TOF, m/z): HRMS (ESI) Calcd for  $[M+H]^+$  285.1403; Found 285.1405.

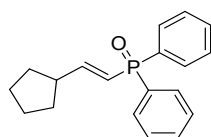

*(E)*-(2-Cyclopentylvinyl)diphenylphosphine oxide (**3ok**)<sup>24</sup>. 83% yield. White solid. <sup>1</sup>H NMR (300 MHz, CDCl<sub>3</sub>) δ 7.73 – 7.63 (m, 4H), 7.55 – 7.38 (m, 6H), 6.72 (ddd,  $J_{P-H} = 19.5$  Hz,  $J_{H-H} = 17.0$  Hz,  $J_{H-H} = 7.5$  Hz, 1H), 6.17 (ddd,  $J = 24.9$  Hz,  $J_{H-H} = 17.0$  Hz,  $J_{H-H} = 1.1$  Hz, 1H), 2.75 – 2.58 (m, 1H), 1.91 – 1.77 (m, 2H), 1.73 – 1.50 (m, 4H), 1.48 – 1.33 (m, 2H). <sup>13</sup>C NMR (75 MHz, CDCl<sub>3</sub>) δ 156.95 (d,  $J = 1.7$  Hz), 133.34 (d,  $J = 104.6$  Hz), 131.73 (d,  $J = 2.7$  Hz), 131.36 (d,  $J = 9.9$  Hz), 128.57 (d,  $J = 12.0$  Hz), 119.34 (d,  $J = 103.3$  Hz), 45.06 (d,  $J = 16.3$  Hz), 32.33, 25.28. <sup>31</sup>P NMR (121 MHz, CDCl<sub>3</sub>) δ 23.72. HRMS (ESI-TOF, m/z): HRMS (ESI) Calcd for  $[M+H]^+$  297.1403; Found 297.1410.

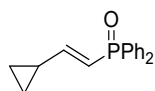

*(E)*-(2-Cyclopropylvinyl)diphenylphosphine oxide (**3pk**)<sup>24</sup>. 52% yield. White solid. <sup>1</sup>H NMR (300 MHz, CDCl<sub>3</sub>) δ 7.70-7.63 (m, 4H), 7.49-7.37 (m, 6H), 6.30-6.06 (m, 2H), 1.70-1.59 (m, 1H), 0.91-0.85 (m, 2H), 0.62-0.57 (m, 2H). <sup>13</sup>C NMR (75 MHz, CDCl<sub>3</sub>) δ 156.75 (d,  $J = 3.1$  Hz), 133.52 (d,  $J = 105.1$  Hz), 131.63 (d,  $J = 2.7$  Hz), 131.26 (d,  $J = 9.9$  Hz), 128.50 (d,  $J = 12.0$  Hz), 117.71 (d,  $J = 106.3$  Hz), 16.68, 16.40, 8.55. <sup>31</sup>P NMR (121 MHz, CDCl<sub>3</sub>) δ 23.26. HRMS (ESI-TOF, m/z):

HRMS (ESI) Calcd for  $[M+H]^+$  269.1090; Found 269.1093.

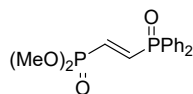

*Dimethyl (E)-(2-(diphenylphosphoryl)vinyl)phosphonate (3qk)*. 63% yield. White solid.  $^1\text{H}$  NMR (300 MHz,  $\text{CDCl}_3$ )  $\delta$  7.73 – 7.65 (m, 4H), 7.60 – 7.34 (m, 7H), 6.98 (ddd,  $J_{\text{p-p}} = 21.6$  Hz,  $J_{\text{p-h}} = J_{\text{h-h}} = 18.6$  Hz, 1H), 3.77 (d,  $J = 11.1$  Hz, 6H).  $^{13}\text{C}$  NMR (75 MHz,  $\text{CDCl}_3$ )  $\delta$  143.58 (dd,  $J = 87.2$  Hz,  $J = 2.1$  Hz), 134.34 (d,  $J = 177.4$  Hz), 132.47 (d,  $J = 2.8$  Hz), 131.23 (d,  $J = 10.1$  Hz), 130.80 (d,  $J = 106.1$  Hz), 128.86 (d,  $J = 12.3$  Hz), 52.88 (d,  $J = 5.9$  Hz).  $^{31}\text{P}$  NMR (121 MHz,  $\text{CDCl}_3$ )  $\delta$  18.93 (dd,  $J_{\text{p-p}} = 603.5$  Hz,  $J_{\text{p-p}} = 69.1$  Hz). HRMS (ESI-TOF,  $m/z$ ): HRMS (ESI) Calcd for  $[M+H]^+$  337.0753; Found 337.0760.

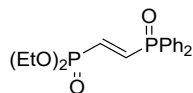

*Diethyl (E)-(2-(diphenylphosphoryl)vinyl)phosphonate (3rk)*. 77% yield. White solid.  $^1\text{H}$  NMR (300 MHz,  $\text{CDCl}_3$ )  $\delta$  7.73 – 7.66 (m, 4H), 7.61 – 7.33 (m, 7H), 6.99 (ddd,  $J_{\text{p-p}} = 21.5$ ,  $J_{\text{p-h}} = J_{\text{h-h}} = 18.6$  Hz, 1H), 4.12 (dq,  $J_{\text{h-h}} = 7.1$ ,  $J_{\text{p-h}} = 2.2$  Hz, 4H), 1.33 (t,  $J_{\text{h-h}} = 7.1$  Hz, 6H).  $^{13}\text{C}$  NMR (75 MHz,  $\text{CDCl}_3$ )  $\delta$  142.47 (dd,  $J = 87.9$  Hz,  $J = 1.9$  Hz), 135.91 (d,  $J = 176.8$  Hz), 132.42 (d,  $J = 2.7$  Hz), 131.26 (d,  $J = 10.1$  Hz), 130.98 (d,  $J = 106.1$  Hz), 128.84 (d,  $J = 12.3$  Hz), 62.52 (d,  $J = 5.9$  Hz), 16.34 (d,  $J = 6.2$  Hz).  $^{31}\text{P}$  NMR (121 MHz,  $\text{CDCl}_3$ )  $\delta$  17.61 (dd,  $J_{\text{p-p}} = 963.6$ ,  $J_{\text{p-p}} = 69.0$  Hz). HRMS (ESI-TOF,  $m/z$ ): HRMS (ESI) Calcd for  $[M+H]^+$  365.1066; Found 365.1072.

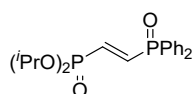

*Diisopropyl (E)-(2-(diphenylphosphoryl)vinyl)phosphonate (3sk)*. 55% yield. White solid.  $^1\text{H}$  NMR (300 MHz,  $\text{CDCl}_3$ )  $\delta$  7.72-7.66 (m, 4H), 7.60 – 7.28 (m, 7H), 7.06 – 6.85 (m, 1H), 4.69 (dh,  $J_{\text{p-h}} = 12.3$  Hz,  $J_{\text{h-h}} = 6.2$  Hz, 2H), 2.92 (d,  $J_{\text{p-h}} = 22.1$  Hz, 2H), 1.31 (dd,  $J_{\text{p-h}} = 16.5$  Hz,  $J_{\text{h-h}} = 6.2$  Hz, 12H).  $^{13}\text{C}$  NMR (75 MHz,  $\text{CDCl}_3$ )  $\delta$  141.38 (dd,  $J = 86.7$  Hz,  $J = 1.7$  Hz), 137.67 (d,  $J = 177.6$  Hz), 132.49 (d,  $J = 2.6$  Hz), 131.41 (d,  $J = 10.0$  Hz), 131.22 (d,  $J = 106.2$  Hz), 128.93 (d,  $J = 12.3$  Hz), 71.58 (d,  $J = 6.0$  Hz), 24.10 (dd,  $J = 7.6$  Hz,  $J = 4.5$  Hz).  $^{31}\text{P}$  NMR (121 MHz,  $\text{CDCl}_3$ )  $\delta$  16.66 (dd,  $J_{\text{p-p}} = 1277.2$  Hz,  $J_{\text{p-p}} = 70.4$  Hz). HRMS (ESI-TOF,  $m/z$ ): HRMS (ESI) Calcd for  $[M+H]^+$  393.1379; Found 393.1380.

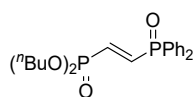

*Dibutyl (E)-(2-(diphenylphosphoryl)vinyl)phosphonate (3tk)*. 56% yield. White solid.  $^1\text{H}$  NMR (300 MHz,  $\text{CDCl}_3$ )  $\delta$  7.65 – 7.58 (m, 4H), 7.52 – 7.22 (m, 7H), 6.91 (ddd,  $J_{\text{P-H}} = 21.4$  Hz,  $J_{\text{P-H}} = J_{\text{H-H}} = 18.6$  Hz, 1H), 4.00 – 3.93 (m, 4H), 1.56 (dt,  $J = 14.6$  Hz,  $J = 6.6$  Hz, 4H), 1.29 (dq,  $J = 14.5$  Hz,  $J = 7.3$  Hz, 4H), 0.82 (t,  $J = 7.4$  Hz, 6H).  $^{13}\text{C}$  NMR (75 MHz,  $\text{CDCl}_3$ )  $\delta$  142.49 (dd,  $J = 87.9$  Hz,  $J = 2.0$  Hz), 135.96 (d,  $J = 176.7$  Hz), 132.50 (d,  $J = 2.7$  Hz), 131.34 (d,  $J = 10.1$  Hz), 131.01 (d,  $J = 106.3$  Hz), 128.91 (d,  $J = 12.3$  Hz), 66.32 (d,  $J = 6.1$  Hz), 32.44 (d,  $J = 6.2$  Hz), 18.73, 13.61.  $^{31}\text{P}$  NMR (121 MHz,  $\text{CDCl}_3$ )  $\delta$  17.77 (dd,  $J_{\text{P-P}} = 961.6$  Hz,  $J_{\text{P-P}} = 69.4$  Hz). HRMS (ESI-TOF,  $m/z$ ): HRMS (ESI) Calcd for  $[\text{M}+\text{H}]^+$  421.1692; Found 421.1695.

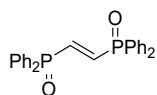

*(E)-Ethene-1,2-diylbis(diphenylphosphine oxide) (3uk)*. 67% yield. White solid.  $^1\text{H}$  NMR (300 MHz,  $\text{CDCl}_3$ )  $\delta$  7.82 – 7.65 (m, 10H), 7.56 – 7.43 (m, 12H).  $^{13}\text{C}$  NMR (75 MHz,  $\text{CDCl}_3$ )  $\delta$  141.60 (ddd,  $J_{\text{P-P}} = 86.7$  Hz,  $J_{\text{P-C}} = J_{\text{P-C}} = 65.9$  Hz), 132.37, 131.40 (dd,  $J = 126.3$  Hz,  $J = 19.9$  Hz), 131.36 (t,  $J = 5.1$  Hz), 128.96 (t,  $J = 6.2$  Hz).  $^{31}\text{P}$  NMR (121 MHz,  $\text{CDCl}_3$ )  $\delta$  21.61. HRMS (ESI-TOF,  $m/z$ ): HRMS (ESI) Calcd for  $[\text{M}+\text{H}]^+$  429.1168; Found 429.1170.

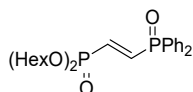

*Dihexyl (E)-(2-(diphenylphosphoryl)vinyl)phosphonate (3vk)*. 60% yield. White solid.  $^1\text{H}$  NMR (300 MHz,  $\text{CDCl}_3$ )  $\delta$  7.75 – 7.66 (m, 4H), 7.60 – 7.32 (m, 7H), 7.00 (ddd,  $J_{\text{P-H}} = 21.4$  Hz,  $J_{\text{P-H}} = J_{\text{H-H}} = 18.7$  Hz, 1H), 4.02 (td,  $J_{\text{P-H}} = 10.3$  Hz,  $J = 8.3$  Hz, 4H), 1.65 (p,  $J = 6.6$  Hz, 4H), 1.49 – 1.10 (m, 12H), 0.87 (t,  $J = 6.7$  Hz, 6H).  $^{13}\text{C}$  NMR (75 MHz,  $\text{CDCl}_3$ )  $\delta$  142.43 (dd,  $J = 88.1$ , 1.6 Hz), 135.96 (d,  $J = 176.9$  Hz), 132.45 (d,  $J = 2.4$  Hz), 131.30 (d,  $J = 10.0$  Hz), 131.05 (d,  $J = 106.1$  Hz), 128.86 (d,  $J = 12.3$  Hz), 66.59 (d,  $J = 6.1$  Hz), 31.27, 30.39 (d,  $J = 6.2$  Hz), 25.13, 22.50, 14.00.  $^{31}\text{P}$  NMR (121 MHz,  $\text{CDCl}_3$ )  $\delta$  17.77 (dd,  $J_{\text{P-P}} = 956.17$  Hz,  $J_{\text{P-P}} = 65.5$  Hz). HRMS (ESI-TOF,  $m/z$ ): HRMS (ESI) Calcd for  $[\text{M}+\text{H}]^+$  505.1903; Found 505.1906.

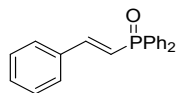

*(E)*-Diphenyl(styryl)phosphine oxide (**5ak**)<sup>21</sup>. 92% yield. White solid. <sup>1</sup>H NMR (300 MHz, CDCl<sub>3</sub>) δ 7.75 (ddd,  $J_{\text{P-H}} = 12.1$  Hz,  $J_{\text{H-H}} = 8.0$ ,  $J_{\text{H-H}} = 1.4$  Hz, 4H), 7.57 – 7.35 (m, 12H), 6.84 (dd,  $J_{\text{P-H}} = 22.4$  Hz,  $J_{\text{H-H}} = 17.4$  Hz, 1H). <sup>13</sup>C NMR (75 MHz, Chloroform-*d*) δ 147.62 (d,  $J = 3.6$  Hz), 135.14 (d,  $J = 17.9$  Hz), 132.97 (d,  $J = 105.9$  Hz), 131.96 (d,  $J = 2.7$  Hz), 131.44 (d,  $J = 10.0$  Hz), 130.19, 128.92, 128.70 (d,  $J = 12.1$  Hz), 127.83, 119.24 (d,  $J = 104.5$  Hz). <sup>31</sup>P NMR (121 MHz, CDCl<sub>3</sub>) δ 24.60. HRMS (ESI-TOF, *m/z*): HRMS (ESI) Calcd for [M+H]<sup>+</sup> 305.1090; Found 305.1093.

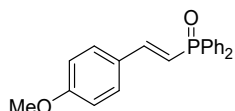

*(E)*-(4-Methoxystyryl)diphenylphosphine oxide (**5bk**)<sup>21</sup>. 95% yield. White solid. <sup>1</sup>H NMR (300 MHz, CDCl<sub>3</sub>) δ 7.79 – 7.72 (m, 4H), 7.55 – 7.28 (m, 9H), 6.89 (d,  $J = 8.8$  Hz, 2H), 6.67 (dd,  $J_{\text{P-H}} = 22.3$  Hz,  $J_{\text{H-H}} = 17.4$  Hz, 1H), 3.81 (s, 3H). <sup>13</sup>C NMR (75 MHz, CDCl<sub>3</sub>) δ 161.20, 147.10, 133.26 (d,  $J = 105.7$  Hz), 131.82 (d,  $J = 2.7$  Hz), 131.41 (d,  $J = 9.9$  Hz), 129.41, 128.61 (d,  $J = 12.1$  Hz), 127.95 (d,  $J = 18.3$  Hz), 116.13 (d,  $J = 106.4$  Hz), 114.25, 55.43. <sup>31</sup>P NMR (121 MHz, CDCl<sub>3</sub>) δ 24.92. HRMS (ESI-TOF, *m/z*): HRMS (ESI) Calcd for [M+H]<sup>+</sup> 335.1195; Found 335.1196.

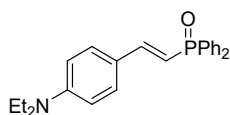

*(E)*-(4-(Diethylamino)styryl)diphenylphosphine oxide (**5ck**). 73% yield. White solid. <sup>1</sup>H NMR (300 MHz, CDCl<sub>3</sub>) δ 7.79 – 7.72 (m, 4H), 7.51 – 7.34 (m, 9H), 6.60 (d,  $J = 8.8$  Hz, 2H), 6.49 (dd,  $J_{\text{P-H}} = 22.4$  Hz,  $J_{\text{P-H}} = 17.3$  Hz, 1H), 3.35 (q,  $J = 7.0$  Hz, 4H), 1.14 (t,  $J = 7.0$  Hz, 6H). <sup>13</sup>C NMR (75 MHz, CDCl<sub>3</sub>) δ 149.01, 147.80 (d,  $J = 4.2$  Hz), 133.68 (d,  $J = 105.2$  Hz), 131.49 (d,  $J = 2.7$  Hz), 131.33 (d,  $J = 9.9$  Hz), 129.54, 128.39 (d,  $J = 12.0$  Hz), 122.08 (d,  $J = 18.5$  Hz), 111.31 (d,  $J = 109.7$  Hz), 111.02, 44.36, 12.49. <sup>31</sup>P NMR (121 MHz, CDCl<sub>3</sub>) δ 26.01. HRMS (ESI-TOF, *m/z*): HRMS (ESI) Calcd for [M+H]<sup>+</sup> 376.1825; Found 376.1831.

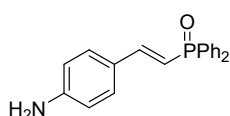

*(E)*-(4-Aminostyryl)diphenylphosphine oxide (**5dk**). 89% yield. White solid. <sup>1</sup>H NMR (300 MHz, CDCl<sub>3</sub>) δ 7.77 – 7.71 (m, 4H), 7.53 – 7.26 (m, 9H), 6.60 (d,  $J = 8.4$  Hz, 2H), 6.53 (dd,  $J_{\text{P-H}} = 22.3$  Hz,  $J_{\text{H-H}} = 17.3$  Hz, 1H), 4.13 (br, 2H). <sup>13</sup>C NMR (75 MHz, CDCl<sub>3</sub>) δ 148.86, 147.78 (d,  $J = 4.0$

Hz), 133.48 (d,  $J = 105.4$  Hz), 131.70 (d,  $J = 2.7$  Hz), 131.40 (d,  $J = 9.9$  Hz), 129.49, 128.54 (d,  $J = 12.1$  Hz), 125.17 (d,  $J = 18.5$  Hz), 114.73, 113.26 (d,  $J = 108.2$  Hz).  $^{31}\text{P}$  NMR (121 MHz,  $\text{CDCl}_3$ )  $\delta$  25.64. HRMS (ESI-TOF,  $m/z$ ): HRMS (ESI) Calcd for  $[\text{M}+\text{H}]^+$  320.1199; Found 320.1200.

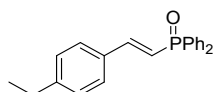

*(E)*-(4-Ethylstyryl)diphenylphosphine oxide (**5ek**)<sup>25</sup>. 86% yield. White solid.  $^1\text{H}$  NMR (300 MHz,  $\text{CDCl}_3$ )  $\delta$  7.77 – 7.71 (m, 4H), 7.53 – 7.42 (m, 9H), 7.19 (d,  $J = 8.0$  Hz, 2H), 6.78 (dd,  $J_{\text{P-H}} = 22.4$  Hz,  $J_{\text{H-H}} = 17.4$  Hz, 1H), 2.63 (q,  $J = 7.6$  Hz, 2H), 1.21 (t,  $J = 7.6$  Hz, 3H).  $^{13}\text{C}$  NMR (75 MHz,  $\text{CDCl}_3$ )  $\delta$  147.54 (d,  $J = 3.6$  Hz), 146.81, 133.09 (d,  $J = 105.7$  Hz), 132.63 (d,  $J = 18.0$  Hz), 131.84 (d,  $J = 2.5$  Hz), 131.39 (d,  $J = 9.9$  Hz), 128.60 (d,  $J = 12.1$  Hz), 128.40, 127.86, 117.88 (d,  $J = 105.3$  Hz), 28.78, 15.46.  $^{31}\text{P}$  NMR (121 MHz,  $\text{CDCl}_3$ )  $\delta$  24.93. HRMS (ESI-TOF,  $m/z$ ): HRMS (ESI) Calcd for  $[\text{M}+\text{H}]^+$  333.1403; Found 333.1408.

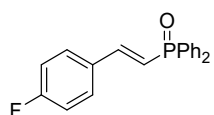

*(E)*-(4-Fluorostyryl)diphenylphosphine oxide (**5fk**)<sup>21</sup>. 90% yield. White solid.  $^1\text{H}$  NMR (300 MHz,  $\text{CDCl}_3$ )  $\delta$  7.76 (ddd,  $J = 12.1$  Hz,  $J = 8.0$  Hz,  $J = 1.5$  Hz, 4H), 7.56 – 7.30 (m, 9H), 7.09 – 7.01 (m, 2H), 6.78 (dd,  $J = 22.2$  Hz,  $J = 17.4$  Hz, 1H).  $^{13}\text{C}$  NMR (75 MHz,  $\text{CDCl}_3$ )  $\delta$  163.72 (d,  $J = 251.0$  Hz), 146.18 (d,  $J = 3.6$  Hz), 132.87 (d,  $J = 106.0$  Hz), 131.94 (d,  $J = 2.5$  Hz), 131.50 (d,  $J = 3.3$  Hz), 131.32 (dd,  $J = 10.0$ , 1.5 Hz), 129.64 (d,  $J = 8.5$  Hz), 128.64 (dd,  $J = 12.1$ , 1.6 Hz), 118.96 (d,  $J = 103.9$  Hz), 115.94 (d,  $J = 21.9$  Hz).  $^{31}\text{P}$  NMR (121 MHz,  $\text{CDCl}_3$ )  $\delta$  24.34. HRMS (ESI-TOF,  $m/z$ ): HRMS (ESI) Calcd for  $[\text{M}+\text{H}]^+$  323.0996; Found 323.1002.

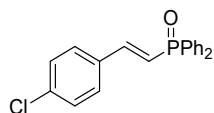

*(E)*-(4-Chlorostyryl)diphenylphosphine oxide (**5gk**)<sup>21</sup>. 73% yield. White solid.  $^1\text{H}$  NMR (300 MHz,  $\text{CDCl}_3$ )  $\delta$  7.79 – 7.72 (m, 4H), 7.57 – 7.29 (m, 11H), 6.83 (dd,  $J_{\text{P-H}} = 22.1$  Hz,  $J_{\text{H-H}} = 17.4$  Hz, 1H).  $^{13}\text{C}$  NMR (75 MHz,  $\text{CDCl}_3$ )  $\delta$  146.09 (d,  $J = 3.7$  Hz), 135.99, 133.61 (d,  $J = 18.1$  Hz), 132.73 (d,  $J = 109.9$  Hz), 132.04, 131.37 (d,  $J = 10.0$  Hz), 129.12, 129.00, 128.71 (d,  $J = 12.2$  Hz), 120.05 (d,  $J = 103.6$  Hz).  $^{31}\text{P}$  NMR (121 MHz,  $\text{CDCl}_3$ )  $\delta$  24.22. HRMS (ESI-TOF,  $m/z$ ): HRMS (ESI) Calcd

for  $[M+H]^+$  339.0700; Found 339.0707.

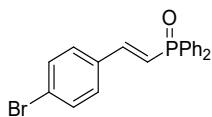

*(E)*-(4-Bromostyryl)diphenylphosphine oxide (**5hk**)<sup>21</sup>. 47% yield. White solid. <sup>1</sup>H NMR (300 MHz, CDCl<sub>3</sub>) δ 7.78 – 7.71 (m, 4H), 7.57 – 7.27 (m, 11H), 6.84 (dd, *J* = 22.1 Hz, *J* = 17.4 Hz, 1H). <sup>13</sup>C NMR (75 MHz, CDCl<sub>3</sub>) δ 146.25 (d, *J* = 3.7 Hz), 134.08 (d, *J* = 18.0 Hz), 132.74 (d, *J* = 106.3 Hz), 132.16, 132.11 (d, *J* = 2.7 Hz), 131.45 (d, *J* = 10.0 Hz), 129.30, 128.79 (d, *J* = 12.2 Hz), 124.43, 120.20 (d, *J* = 103.3 Hz). <sup>31</sup>P NMR (121 MHz, CDCl<sub>3</sub>) δ 24.36. HRMS (ESI-TOF, *m/z*): HRMS (ESI) Calcd for  $[M+H]^+$  383.0195; Found 383.0199.

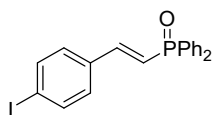

*(E)*-(4-Iodostyryl)diphenylphosphine oxide (**5ik**)<sup>21</sup>. 68% yield. Light yellow solid. <sup>1</sup>H NMR (300 MHz, CDCl<sub>3</sub>) δ 7.78 – 7.67 (m, 6H), 7.60 – 7.36 (m, 7H), 7.28 – 7.22 (m, 2H), 6.85 (dd, *J*<sub>P-H</sub> = 22.1 Hz, *J*<sub>H-H</sub> = 17.4 Hz, 1H). <sup>13</sup>C NMR (75 MHz, CDCl<sub>3</sub>) δ 146.42 (d, *J* = 3.8 Hz), 138.16, 134.67 (d, *J* = 18.0 Hz), 132.76 (d, *J* = 106.1 Hz), 132.13 (d, *J* = 2.8 Hz), 131.47 (d, *J* = 10.0 Hz), 129.40 (d, *J* = 0.6 Hz), 128.81 (d, *J* = 12.2 Hz), 120.33 (d, *J* = 103.4 Hz), 96.44. <sup>31</sup>P NMR (121 MHz, CDCl<sub>3</sub>) δ 24.27. HRMS (ESI-TOF, *m/z*): HRMS (ESI) Calcd for  $[M+H]^+$  431.0056; Found 431.0058.

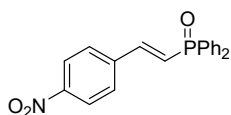

*(E)*-(4-Nitrostyryl)diphenylphosphine oxide (**5jk**)<sup>21</sup>. 57% yield. White solid. <sup>1</sup>H NMR (300 MHz, CDCl<sub>3</sub>) δ 8.20 (d, *J* = 8.8 Hz, 2H), 7.77 – 7.70 (m, 4H), 7.67 – 7.44 (m, 9H), 7.04 (dd, *J* = 21.7, *J* = 17.4 Hz, 1H). <sup>13</sup>C NMR (75 MHz, CDCl<sub>3</sub>) δ 148.38, 144.63 (d, *J* = 3.6 Hz), 141.09 (d, *J* = 17.8 Hz), 132.30 (d, *J* = 2.7 Hz), 132.21 (d, *J* = 106.7 Hz), 131.38 (d, *J* = 10.1 Hz), 128.87 (d, *J* = 12.3 Hz), 124.88 (d, *J* = 102.1 Hz), 124.20. <sup>31</sup>P NMR (121 MHz, CDCl<sub>3</sub>) δ 23.38. HRMS (ESI-TOF, *m/z*): HRMS (ESI) Calcd for  $[M+H]^+$  350.0941; Found 350.0942.

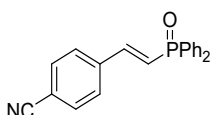

*(E)*-4-(2-(Diphenylphosphoryl)vinyl)benzonitrile (**5kk**)<sup>21</sup>. 89% yield. White solid. <sup>1</sup>H NMR (300 MHz, CDCl<sub>3</sub>) δ 7.75 – 7.69 (m, 4H), 7.65 – 7.43 (m, 11H), 6.98 (dd, *J* = 21.8, 17.4 Hz, 1H). <sup>13</sup>C NMR (75 MHz, CDCl<sub>3</sub>) δ 145.11 (d, *J* = 3.6 Hz), 139.22 (d, *J* = 17.8 Hz), 132.66, 132.24 (d, *J* = 2.7 Hz), 132.22 (d, *J* = 106.5 Hz), 131.34 (d, *J* = 10.0 Hz), 128.82 (d, *J* = 12.3 Hz), 128.23, 123.86 (d, *J* = 100.9 Hz), 118.43, 113.18. <sup>31</sup>P NMR (121 MHz, CDCl<sub>3</sub>) δ 23.59. HRMS (ESI-TOF, *m/z*): HRMS (ESI) Calcd for [M+H]<sup>+</sup> 330.1042; Found 330.1047.

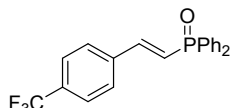

*(E)*-Diphenyl(4-(trifluoromethyl)styryl)phosphine oxide (**5lk**)<sup>21</sup>. 78% yield. White solid. <sup>1</sup>H NMR (300 MHz, CDCl<sub>3</sub>) δ 7.74 (ddd, *J* = 12.2 Hz, *J* = 8.0 Hz, *J* = 1.4 Hz, 4H), 7.59 (s, 4H), 7.55 – 7.42 (m, 7H), 6.95 (dd, *J* = 22.0 Hz, *J* = 17.4 Hz, 1H). <sup>13</sup>C NMR (75 MHz, CDCl<sub>3</sub>) δ 145.72 (d, *J* = 3.6 Hz), 138.41 (d, *J* = 16.8 Hz), 132.48 (d, *J* = 106.3 Hz), 132.14 (d, *J* = 2.7 Hz), 131.36 (d, *J* = 10.0 Hz), 131.36, 128.77 (d, *J* = 12.2 Hz), 127.99, 125.84 (q, *J* = 3.8 Hz), 123.85 (d, *J*<sub>F-C</sub> = 272.3 Hz), 122.56 (d, *J* = 102.1 Hz). <sup>31</sup>P NMR (121 MHz, CDCl<sub>3</sub>) δ 23.84. HRMS (ESI-TOF, *m/z*): HRMS (ESI) Calcd for [M+H]<sup>+</sup> 373.0964; Found 373.0969.

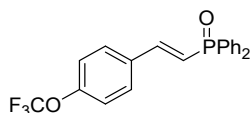

*(E)*-Diphenyl(4-(trifluoromethoxy)styryl)phosphine oxide (**5mk**)<sup>21</sup>. 60% yield. White solid. <sup>1</sup>H NMR (300 MHz, CDCl<sub>3</sub>) δ 7.76 – 7.64 (m, 4H), 7.54 – 7.40 (m, 9H), 7.17 (d, *J* = 8.2 Hz, 2H), 6.82 (dd, *J*<sub>P-H</sub> = 22.1 Hz, *J*<sub>H-H</sub> = 17.4 Hz, 1H). <sup>13</sup>C NMR (75 MHz, CDCl<sub>3</sub>) δ 150.21 (d, *J* = 1.7 Hz), 145.74 (d, *J* = 3.7 Hz), 133.73 (d, *J* = 18.1 Hz), 132.67 (d, *J* = 106.1 Hz), 132.02 (d, *J* = 2.7 Hz), 131.32 (d, *J* = 10.0 Hz), 129.23, 128.69 (d, *J* = 12.2 Hz), 121.13, 120.52 (d, *J* = 103.3 Hz), 120.34 (d, *J* = 257.9 Hz). <sup>31</sup>P NMR (121 MHz, CDCl<sub>3</sub>) δ 24.09. HRMS (ESI-TOF, *m/z*): HRMS (ESI) Calcd for [M+H]<sup>+</sup> 389.0913; Found 389.0918.

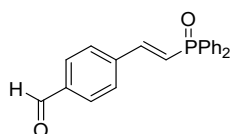

*(E)*-4-(2-(Diphenylphosphoryl)vinyl)benzaldehyde (**5nk**)<sup>26</sup>. 76% yield. White solid. <sup>1</sup>H NMR

(300 MHz, CDCl<sub>3</sub>) δ 10.00 (s, 1H), 7.88 (d, *J* = 8.2 Hz, 2H), 7.78 – 7.63 (m, 6H), 7.58 – 7.42 (m, 7H), 7.00 (dd, *J*<sub>P-H</sub> = 22.0 Hz, *J*<sub>H-H</sub> = 17.4 Hz, 1H). <sup>13</sup>C NMR (75 MHz, CDCl<sub>3</sub>) δ 191.59, 145.89 (d, *J* = 3.5 Hz), 140.66 (d, *J* = 17.6 Hz), 137.07, 132.43 (d, *J* = 106.5 Hz), 132.23 (d, *J* = 2.7 Hz), 131.43 (d, *J* = 10.0 Hz), 130.26, 128.84 (d, *J* = 12.2 Hz), 128.37, 123.37 (d, *J* = 101.6 Hz). <sup>31</sup>P NMR (121 MHz, CDCl<sub>3</sub>) δ 23.85. HRMS (ESI-TOF, *m/z*): HRMS (ESI) Calcd for [M+H]<sup>+</sup> 333.1039; Found 333.1044.

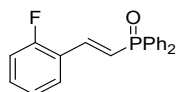

(*E*)-(2-Fluorostyryl)diphenylphosphine oxide (**5ok**)<sup>26</sup>. 92% yield. White solid. <sup>1</sup>H NMR (300 MHz, CDCl<sub>3</sub>) δ 7.80 – 7.29 (m, 13H), 7.17 - 6.94 (m, 3H). <sup>13</sup>C NMR (75 MHz, CDCl<sub>3</sub>) δ 161.16 (d, *J* = 253.2 Hz), 140.32 (dd, *J* = 4.2 Hz, *J* = 2.7 Hz), 132.73 (d, *J* = 105.9 Hz), 131.96 (d, *J* = 2.7 Hz), 131.57, 131.38 (d, *J* = 10.0 Hz), 129.28 (d, *J* = 2.3 Hz), 128.67 (d, *J* = 12.1 Hz), 124.44 (d, *J* = 3.6 Hz), 123.13 (dd, *J* = 18.1 Hz, *J* = 11.2 Hz), 122.65 (dd, *J* = 102.7, 6.9 Hz), 116.21 (d, *J* = 21.9 Hz). <sup>31</sup>P NMR (121 MHz, CDCl<sub>3</sub>) δ 24.23. HRMS (ESI-TOF, *m/z*): HRMS (ESI) Calcd for [M+H]<sup>+</sup> 323.0996; Found 323.0998.

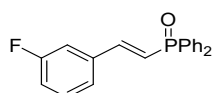

(*E*)-(3-Fluorostyryl)diphenylphosphine oxide (**5pk**). 84% yield. White solid. <sup>1</sup>H NMR (300 MHz, CDCl<sub>3</sub>) δ 7.79 7.72(m, 4), 7.57 7.44(m, 7H), 7.37 – 7.21 (m, 3H), 7.08 – 7.01 (m, 1H), 6.87 (dd, *J*<sub>P-H</sub> = 22.1 Hz, *J*<sub>H-H</sub> = 17.3 Hz, 1H). <sup>13</sup>C NMR (75 MHz, CDCl<sub>3</sub>) δ 163.01 (d, *J*<sub>F-C</sub> = 247.2 Hz), 146.09 (dd, *J* = 3.3 Hz, *J* = 2.9 Hz), 137.36 (dd, *J* = 18.2, 7.5 Hz), 133.39, 132.03 (d, *J* = 2.7 Hz), 131.35 (d, *J* = 10.0 Hz), 130.46 (d, *J* = 8.3 Hz), 128.71 (d, *J* = 12.2 Hz), 123.88 (d, *J* = 2.4 Hz), 121.05 (d, *J* = 102.9 Hz), 116.95 (d, *J* = 21.4 Hz), 113.98 (d, *J* = 22.4 Hz). <sup>31</sup>P NMR (121 MHz, CDCl<sub>3</sub>) δ 23.92. HRMS (ESI-TOF, *m/z*): HRMS (ESI) Calcd for [M+H]<sup>+</sup> 323.0996; Found 323.0995.

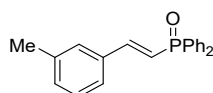

(*E*)-(3-Methylstyryl)diphenylphosphine oxide (**5qk**)<sup>21</sup>. 80% yield. White solid. <sup>1</sup>H NMR (300 MHz, CDCl<sub>3</sub>) δ 7.79 – 7.72 (m, 4H), 7.56 - 7.42 (m, 7H), 7.34 – 7.16 (m, 4H), 6.83 (dd, *J*<sub>P-H</sub> = 22.5 Hz, *J*<sub>P-H</sub> = 17.4 Hz, 1H), 2.35 (s, 3H). <sup>13</sup>C NMR (75 MHz, CDCl<sub>3</sub>) δ 147.74 (d, *J* = 3.6 Hz),



138.54, 135.06 (d,  $J = 17.8$  Hz), 133.01 (d,  $J = 105.8$  Hz), 131.90 (d,  $J = 2.7$  Hz), 131.41 (d,  $J = 10.0$  Hz), 130.98, 128.79, 128.64 (d,  $J = 12.1$  Hz), 128.33, 125.09, 118.91 (d,  $J = 104.6$  Hz), 21.38.  $^{31}\text{P}$  NMR (121 MHz,  $\text{CDCl}_3$ )  $\delta$  24.67. HRMS (ESI-TOF,  $m/z$ ): HRMS (ESI) Calcd for  $[\text{M}+\text{H}]^+$  319.1246; Found 319.1251.

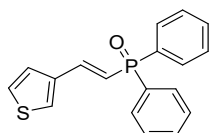

*(E)*-Diphenyl(2-(thiophen-3-yl)vinyl)phosphine oxide (**5rk**)<sup>21</sup>. 87% yield. White solid.  $^1\text{H}$  NMR (300 MHz,  $\text{CDCl}_3$ )  $\delta$  7.78 – 7.67 (m, 4H), 7.56 – 7.37 (m, 8H), 7.32 – 7.27 (m, 2H), 6.61 (dd,  $J_{\text{P-H}} = 22.4$  Hz,  $J_{\text{H-H}} = 17.3$  Hz, 1H).  $^{13}\text{C}$  NMR (75 MHz,  $\text{CDCl}_3$ )  $\delta$  141.09 (d,  $J = 3.9$  Hz), 138.50 (d,  $J = 19.2$  Hz), 132.88 (d,  $J = 105.9$  Hz), 131.93 (d,  $J = 2.8$  Hz), 131.40 (d,  $J = 10.0$  Hz), 128.66 (d,  $J = 12.1$  Hz), 127.55, 126.96, 125.04, 118.52 (d,  $J = 105.2$  Hz).  $^{31}\text{P}$  NMR (121 MHz,  $\text{CDCl}_3$ )  $\delta$  24.88. HRMS (ESI-TOF,  $m/z$ ): HRMS (ESI) Calcd for  $[\text{M}+\text{H}]^+$  311.0654; Found 311.0657.

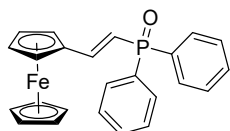

*(E)*-2-(Diphenylphosphoryl)ethenyl ferrocene (**5sk**)<sup>25</sup>. 91% yield. Yellow solid.  $^1\text{H}$  NMR (300 MHz,  $\text{CDCl}_3$ )  $\delta$  7.80 – 7.68 (m, 4H), 7.60 – 7.24 (m, 7H), 6.37 (dd,  $J_{\text{P-H}} = 23.2$  Hz,  $J_{\text{H-H}} = 17.1$  Hz, 1H), 4.51 – 4.45 (m, 2H), 4.41 – 4.33 (m, 2H), 4.13 (s, 5H).  $^{13}\text{C}$  NMR (75 MHz,  $\text{CDCl}_3$ )  $\delta$  148.16 (d,  $J = 4.0$  Hz), 133.54 (d,  $J = 105.4$  Hz), 131.79 (d,  $J = 2.7$  Hz), 131.41 (d,  $J = 9.9$  Hz), 128.63 (d,  $J = 12.0$  Hz), 115.14 (d,  $J = 107.3$  Hz), 80.25, 79.98, 70.67, 69.62, 68.31.  $^{31}\text{P}$  NMR (121 MHz,  $\text{CDCl}_3$ )  $\delta$  24.73. HRMS (ESI-TOF,  $m/z$ ): HRMS (ESI) Calcd for  $[\text{M}+\text{H}]^+$  413.0758; Found 413.0766.

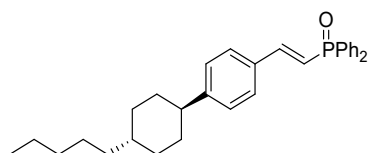

*((E)*-4-((1s,4r)-4-Pentylcyclohexyl)styryl)diphenylphosphine oxide (**5tk**). 87% yield. White solid.  $^1\text{H}$  NMR (300 MHz,  $\text{CDCl}_3$ )  $\delta$  7.78 – 7.71 (m, 4H), 7.54 – 7.41 (m, 9H), 7.21 (d,  $J = 8.2$  Hz, 2H), 6.77 (dd,  $J = 22.5, 17.4$  Hz, 1H), 2.46 (t,  $J = 12.2$  Hz, 1H), 1.86 (d,  $J = 11.3$  Hz, 4H), 1.49 – 1.17 (m, 11H), 1.03 (dd,  $J = 11.4, 10.9$  Hz, 2H), 0.87 (t,  $J = 7.1$  Hz, 3H).  $^{13}\text{C}$  NMR (75 MHz,  $\text{CDCl}_3$ )

$\delta$  150.45, 147.54 (d,  $J = 3.8$  Hz), 133.12 (d,  $J = 105.7$  Hz), 132.81 (d,  $J = 17.9$  Hz), 131.83 (d,  $J = 2.7$  Hz), 131.40 (d,  $J = 10.0$  Hz), 128.60 (d,  $J = 12.1$  Hz), 127.85, 127.39, 117.89 (d,  $J = 105.4$  Hz), 44.56, 37.36, 37.24, 34.16, 32.22, 26.67, 22.76, 14.20.  $^{31}\text{P}$  NMR (121 MHz,  $\text{CDCl}_3$ )  $\delta$  24.78. HRMS (ESI-TOF,  $m/z$ ): HRMS (ESI) Calcd for  $[\text{M}+\text{H}]^+$  457.2655; Found 457.2661.

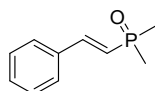

*(E)*-Dimethyl(styryl)phosphine oxide (**5aw**)<sup>27</sup>. 58% yield. Colorless oil.  $^1\text{H}$  NMR (300 MHz,  $\text{CDCl}_3$ )  $\delta$  7.58 – 7.19 (m, 6H), 6.42 (dd,  $J_{\text{P-H}} = 24.8$ ,  $J_{\text{H-H}} = 17.4$  Hz, 1H), 1.61 (d,  $J = 13.0$  Hz, 6H).  $^{13}\text{C}$  NMR (75 MHz,  $\text{CDCl}_3$ )  $\delta$  145.90 (d,  $J = 2.8$  Hz), 135.06 (d,  $J = 17.4$  Hz), 130.04, 128.96, 127.62, 121.17 (d,  $J = 98.4$  Hz), 17.91 (d,  $J = 73.1$  Hz).  $^{31}\text{P}$  NMR (121 MHz,  $\text{CDCl}_3$ )  $\delta$  31.82. HRMS (ESI-TOF,  $m/z$ ): HRMS (ESI) Calcd for  $[\text{M}+\text{H}]^+$  181.0777; Found 181.0778.

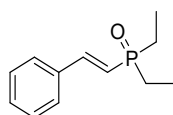

*(E)*-Diethyl(styryl)phosphine oxide (**5ax**)<sup>28</sup>. 92% yield. Colorless oil.  $^1\text{H}$  NMR (300 MHz,  $\text{CDCl}_3$ )  $\delta$  7.60 – 7.17 (m, 6H), 6.30 (dd,  $J_{\text{P-H}} = 24.9$  Hz,  $J_{\text{H-H}} = 17.5$  Hz, 1H), 1.99 – 1.62 (m, 4H), 1.18 (dt,  $J_{\text{P-H}} = 16.9$  Hz,  $J_{\text{H-H}} = 7.7$  Hz, 6H).  $^{13}\text{C}$  NMR (75 MHz,  $\text{CDCl}_3$ )  $\delta$  147.82 (d,  $J = 2.0$  Hz), 135.28 (d,  $J = 16.3$  Hz), 129.96, 128.93, 127.62, 117.92 (d,  $J = 92.5$  Hz), 22.15 (d,  $J = 71.1$  Hz), 5.85 (d,  $J = 4.9$  Hz).  $^{31}\text{P}$  NMR (121 MHz,  $\text{CDCl}_3$ )  $\delta$  42.00. HRMS (ESI-TOF,  $m/z$ ): HRMS (ESI) Calcd for  $[\text{M}+\text{H}]^+$  209.1090; Found 209.1097.

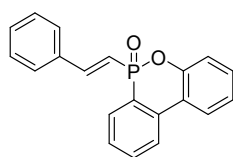

*(E)*-6-Styryldibenzo[*c,e*][1,2]oxaphosphinine 6-oxide (**5ay**)<sup>21</sup>. 87% yield. White solid.  $^1\text{H}$  NMR (300 MHz,  $\text{CDCl}_3$ )  $\delta$  8.04 – 7.95 (m, 2H), 7.88 – 7.66 (m, 3H), 7.58 – 7.45 (m, 3H), 7.43 – 7.35 (m, 4H), 7.31 – 7.21 (m, 2H), 6.50 (dd,  $J_{\text{P-H}} = 21.8$  Hz,  $J_{\text{H-H}} = 17.4$  Hz, 1H).  $^{13}\text{C}$  NMR (75 MHz,  $\text{CDCl}_3$ )  $\delta$  150.53 (d,  $J = 6.4$  Hz), 149.11 (d,  $J = 8.2$  Hz), 135.66 (d,  $J = 5.8$  Hz), 134.69, 134.41, 133.18 (d,  $J = 2.3$  Hz), 130.73 (d,  $J = 16.7$  Hz), 130.64 (d,  $J = 12.3$  Hz), 129.03, 128.43 (d,  $J = 14.1$  Hz), 128.23, 125.97, 125.19 (d,  $J = 0.7$  Hz), 124.70, 123.97, 123.84, 123.23 (d,  $J = 152.2$  Hz),

122.37, 120.77 (d,  $J = 6.1$  Hz), 115.21 (d,  $J = 144.3$  Hz).  $^{31}\text{P}$  NMR (121 MHz,  $\text{CDCl}_3$ )  $\delta$  23.90. HRMS (ESI-TOF,  $m/z$ ): HRMS (ESI) Calcd for  $[\text{M}+\text{H}]^+$  319.0882; Found 319.0887.

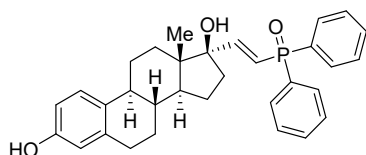

*((E)-2-((8R,9S,13S,14S,17R)-3,17-Dihydroxy-13-methyl-7,8,9,11,12,13,14,15,16,17-decahydro-6H-cyclopenta[a]phenanthren-17-yl)vinyl)diphenylphosphine oxide (5uk)*<sup>29</sup>. 75% yield. White solid.  $^1\text{H}$  NMR (300 MHz,  $d_6$ -DMSO)  $\delta$  9.08 (s, 1H), 7.72 – 7.54 (m, 4H), 7.51 – 7.37 (m, 6H), 7.00 – 6.78 (m, 2H), 6.57 (dd,  $J = 28.0, 16.8$  Hz, 1H), 6.46 – 6.39 (m, 1H), 6.36 – 6.32 (m, 1H), 5.01 (s, 1H), 2.65 – 2.53 (m, 2H), 2.14 – 2.00 (m, 1H), 1.83 – 1.56 (m, 5H), 1.51 – 1.44 (m, 1H), 1.36 – 1.01 (m, 6H), 0.77 (s, 3H).  $^{13}\text{C}$  NMR (75 MHz,  $d_6$ -DMSO)  $\delta$  156.79, 155.02, 137.11, 134.98, 134.74, 133.62, 133.37, 131.87 – 131.64 (m), 130.81, 130.69, 130.56, 130.27, 128.75 (d,  $J = 11.5$  Hz), 126.04, 117.84 (d,  $J = 100.6$  Hz), 114.92, 112.66, 83.75 (d,  $J = 14.6$  Hz), 49.25, 47.35, 43.24, 36.13, 32.35, 29.21, 27.22, 25.97, 23.19, 14.28.  $^{31}\text{P}$  NMR (121 MHz,  $\text{CDCl}_3$ )  $\delta$  21.44. HRMS (ESI-TOF,  $m/z$ ): HRMS (ESI) Calcd for  $[\text{M}+\text{H}]^+$  499.2397; Found 499.2403.

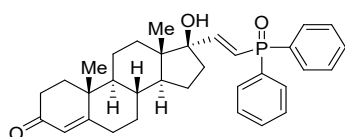

*(8R,9S,10R,13S,14S,17R)-17-((E)-2-(Diphenylphosphoryl)vinyl)-17-hydroxy-10,13-dimethyl-1,2,6,7,8,9,10,11,12,13,14,15,16,17-tetradecahydro-3H-cyclopenta[a]phenanthren-3-one (5vk)*<sup>29</sup>. 81% yield. White solid.  $^1\text{H}$  NMR (300 MHz,  $\text{CDCl}_3$ )  $\delta$  7.73 – 7.61 (m, 4H), 7.55 – 7.33 (m, 6H), 7.04 (dd,  $J = 19.9, 16.8$  Hz, 1H), 6.50 (dd,  $J = 27.3, 16.8$  Hz, 1H), 5.72 (s, 1H), 2.48 – 2.20 (m, 6H), 2.10 – 1.78 (m, 6H), 1.74 – 1.33 (m, 10H), 1.16 (s, 3H), 0.96 (s, 3H), 0.92 – 0.80 (m, 2H).  $^{13}\text{C}$  NMR (75 MHz,  $\text{CDCl}_3$ )  $\delta$  199.64, 171.06, 155.72, 134.10 (d,  $J = 3.9$  Hz), 132.70 (d,  $J = 3.7$  Hz), 132.01 – 131.74 (m), 131.31 (d,  $J = 10.1$  Hz), 128.67 (d,  $J = 12.5$  Hz), 124.09, 118.08 (d,  $J = 102.1$  Hz), 85.00 (d,  $J = 14.4$  Hz), 53.33, 50.18, 47.41, 38.65, 37.42, 36.40, 35.75, 34.03, 32.83, 32.48, 31.68, 23.93, 20.73, 17.48, 14.35.  $^{31}\text{P}$  NMR (121 MHz,  $\text{CDCl}_3$ )  $\delta$  23.76. HRMS (ESI-TOF,  $m/z$ ): HRMS (ESI) Calcd for  $[\text{M}+\text{H}]^+$  515.2710; Found 515.2715.

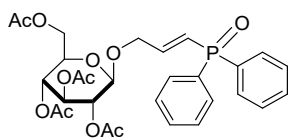

(2*R*,3*R*,4*S*,5*R*,6*R*)-2-(Acetoxymethyl)-6-(((*E*)-3-(diphenylphosphoryl)allyl)oxy)tetrahydro-2*H*-pyran-3,4,5-triyl triacetate (**5wk**). 57% yield. White solid. <sup>1</sup>H NMR (300 MHz, CDCl<sub>3</sub>) δ 7.77 – 7.58 (m, 4H), 7.57 – 7.34 (m, 6H), 6.77 (ddt, *J* = 20.1, 17.0, 3.2 Hz, 1H), 6.54 (ddt, *J* = 24.8, 16.9, 1.7 Hz, 1H), 5.26 – 5.00 (m, 3H), 4.68 – 4.51 (m, 2H), 4.32 – 4.19 (m, 2H), 4.13 – 4.02 (m, 1H), 3.73 – 3.60 (m, 1H), 2.05 (s, 3H), 2.01 (s, 2H), 1.99 (s, 2H), 1.88 (s, 2H). <sup>13</sup>C NMR (75 MHz, CDCl<sub>3</sub>) δ 170.74, 170.30, 169.50, 169.39, 145.73 (d, *J* = 3.2 Hz), 133.48 (d, *J* = 6.3 Hz), 132.16 – 131.88 (m), 131.31 (d, *J* = 10.0 Hz), 131.22 (d, *J* = 9.9 Hz), 128.70 (d, *J* = 12.1 Hz), 122.07 (d, *J* = 101.9 Hz), 100.52, 72.59, 71.99, 71.21, 69.22 (d, *J* = 16.7 Hz), 68.24, 61.82, 20.85, 20.72, 20.70, 20.66. <sup>31</sup>P NMR (121 MHz, CDCl<sub>3</sub>) δ 23.02. HRMS (ESI-TOF, *m/z*): HRMS (ESI) Calcd for [M+H]<sup>+</sup> 589.1833; Found 589.1842.

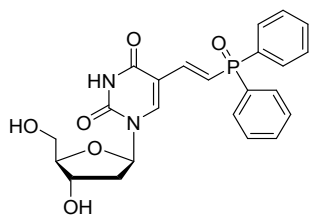

5-(((*E*)-2-(Diphenylphosphoryl)vinyl)-1-((2*R*,4*S*,5*R*)-4-hydroxy-5-(hydroxymethyl)tetrahydrofuran-2-yl)pyrimidine-2,4(1*H*,3*H*)-dione (**5xk**). 62% yield. White solid. <sup>1</sup>H NMR (300 MHz, *d*<sub>7</sub>-DMF) δ 11.74 (s, 1H), 7.88 – 7.72 (m, 4H), 7.59 (s, 7H), 7.43 – 7.20 (m, 1H), 6.42 – 6.23 (m, 1H), 5.61 – 5.42 (m, 2H), 4.62 – 4.41 (m, 1H), 3.97 (s, 1H), 3.91 – 3.73 (m, 5H), 2.47 – 2.23 (m, 2H), 2.22 – 2.05 (m, 2H). <sup>13</sup>C NMR (75 MHz, *d*<sub>7</sub>-DMF) δ 163.24, 150.71, 145.82, 144.38, 140.60 (d, *J* = 3.9 Hz), 135.79 (d, *J* = 103.7 Hz), 132.71, 131.85 (d, *J* = 9.7 Hz), 129.83 (d, *J* = 11.7 Hz), 119.57 (d, *J* = 102.9 Hz), 118.69, 110.47 (d, *J* = 17.1 Hz), 89.35, 86.38, 71.49, 62.50. <sup>31</sup>P NMR (121 MHz, *d*<sub>7</sub>-DMF) δ 20.86. HRMS (ESI-TOF, *m/z*): HRMS (ESI) Calcd for [M+H]<sup>+</sup> 455.1366; Found 455.1371.

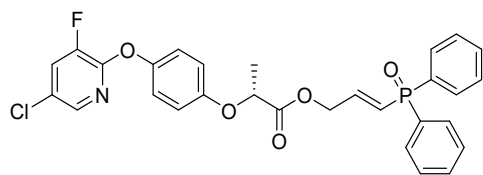

(*E*)-3-(Diphenylphosphoryl)allyl (*R*)-2-(4-((5-chloro-3-fluoropyridin-2-yl)oxy)phenoxy)propanoate (**5yk**). 61% yield. White solid. <sup>1</sup>H NMR (300 MHz, CDCl<sub>3</sub>) δ 7.77 (d, *J*<sub>H-H</sub> =

2.2 Hz, 1H), 7.67 – 7.55 (m, 4H), 7.54 – 7.41 (m, 7H), 7.08 – 6.85 (m, 4H), 6.75 (ddt,  $J_{\text{P-H}} = 20.9$  Hz,  $J_{\text{H-H}} = 17.1$  Hz,  $J_{\text{H-H}} = 3.9$  Hz, 1H), 6.33 (ddt,  $J_{\text{P-H}} = 23.0$  Hz,  $J_{\text{H-H}} = 17.1$ , 1.7 Hz, 1H), 5.19 – 4.57 (m, 3H), 1.64 (d,  $J_{\text{H-H}} = 6.8$  Hz, 3H).  $^{13}\text{C}$  NMR (75 MHz,  $\text{CDCl}_3$ )  $\delta$  171.53, 154.85, 151.26 (d,  $J = 11.2$  Hz), 147.04, 146.97 (d,  $J_{\text{P-C}} = 265.9$  Hz), 143.82 (d,  $J = 3.4$  Hz), 140.17 (d,  $J = 6.1$  Hz), 132.87 (d,  $J = 4.7$  Hz), 132.13 (d,  $J = 2.7$  Hz), 131.49, 131.34 (d,  $J = 10.1$  Hz), 128.74 (d,  $J = 12.3$  Hz), 125.06 (d,  $J = 1.4$  Hz), 125.04 (d,  $J = 18.1$  Hz), 123.30 (d,  $J_{\text{P-C}} = 101.0$  Hz), 122.49, 115.92, 73.01, 64.48 (d,  $J = 17.7$  Hz), 18.84.  $^{31}\text{P}$  NMR (121 MHz,  $\text{CDCl}_3$ )  $\delta$  23.26. HRMS (ESI-TOF,  $m/z$ ): HRMS (ESI) Calcd for  $[\text{M}+\text{H}]^+$  552.1137; Found 552.1144.

## 8. NMR spectra

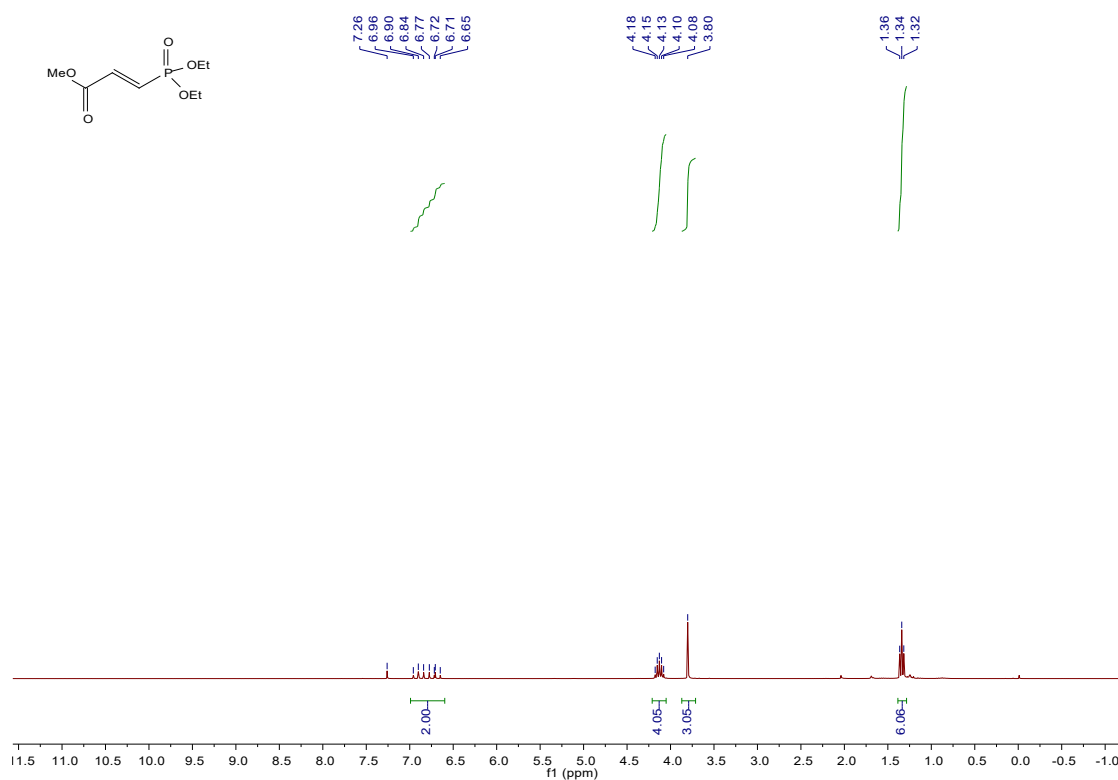

$^1\text{H}$  NMR of compound 3aa

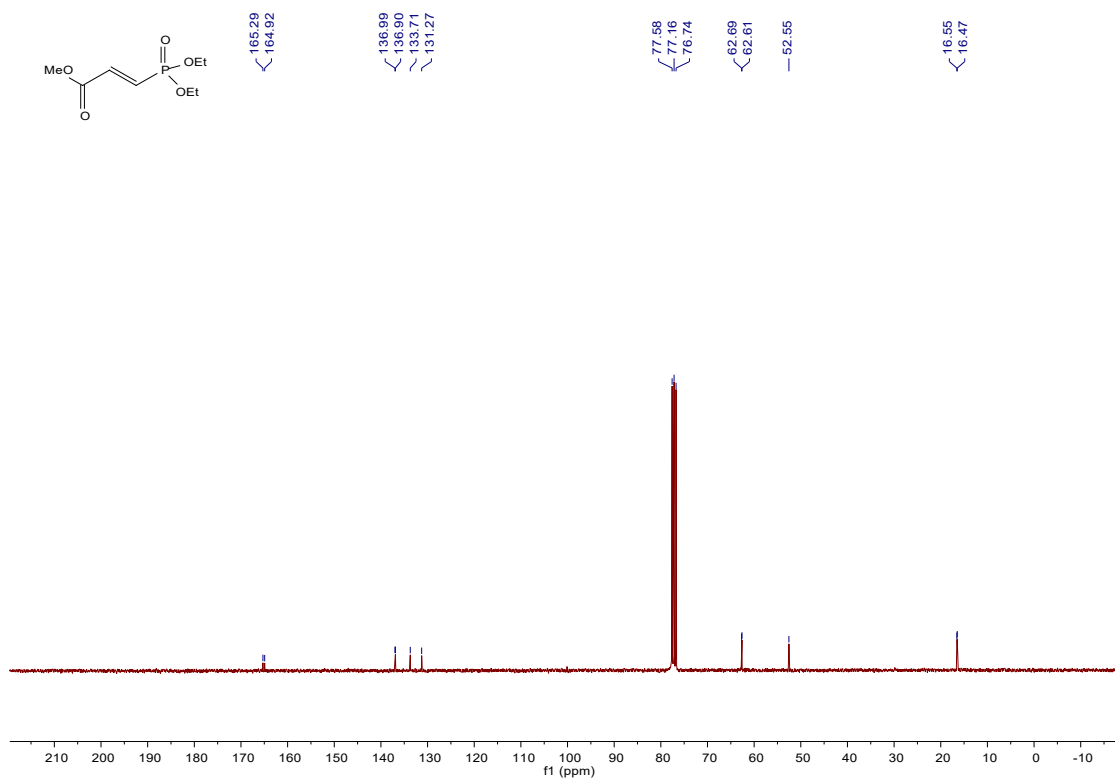

<sup>13</sup>C NMR of compound 3aa

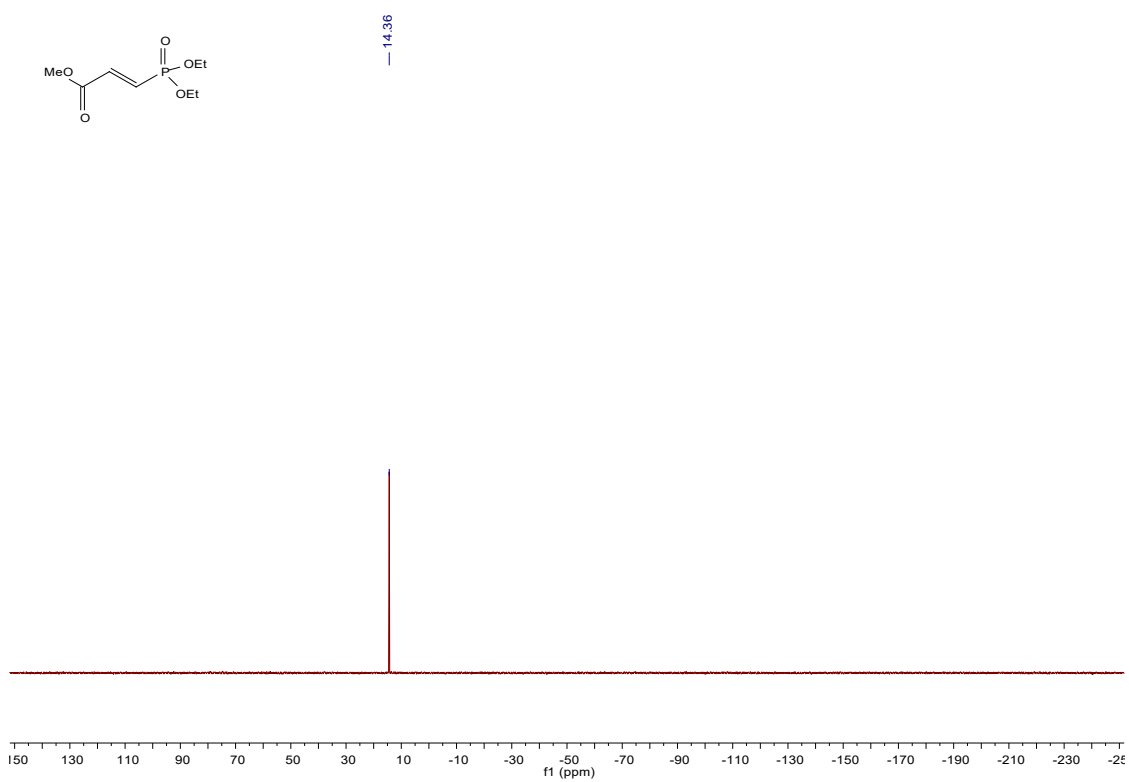

<sup>31</sup>P NMR of compound 3aa

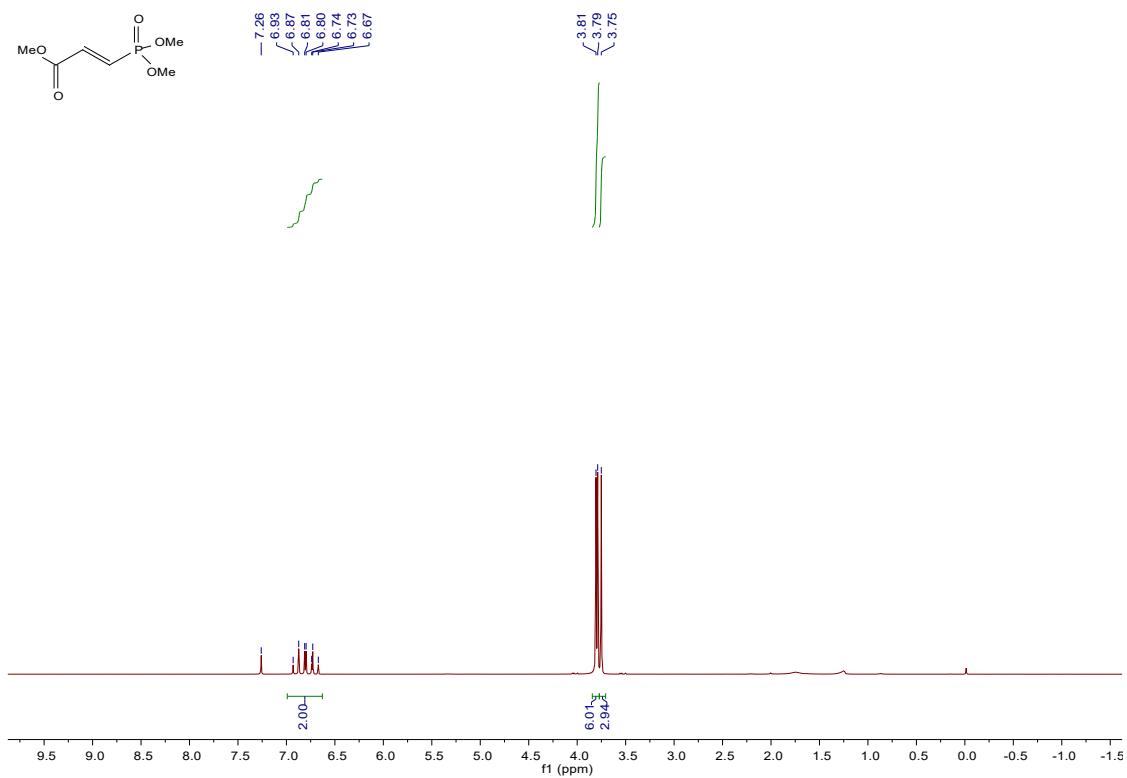

<sup>1</sup>H NMR of compound **3ab**

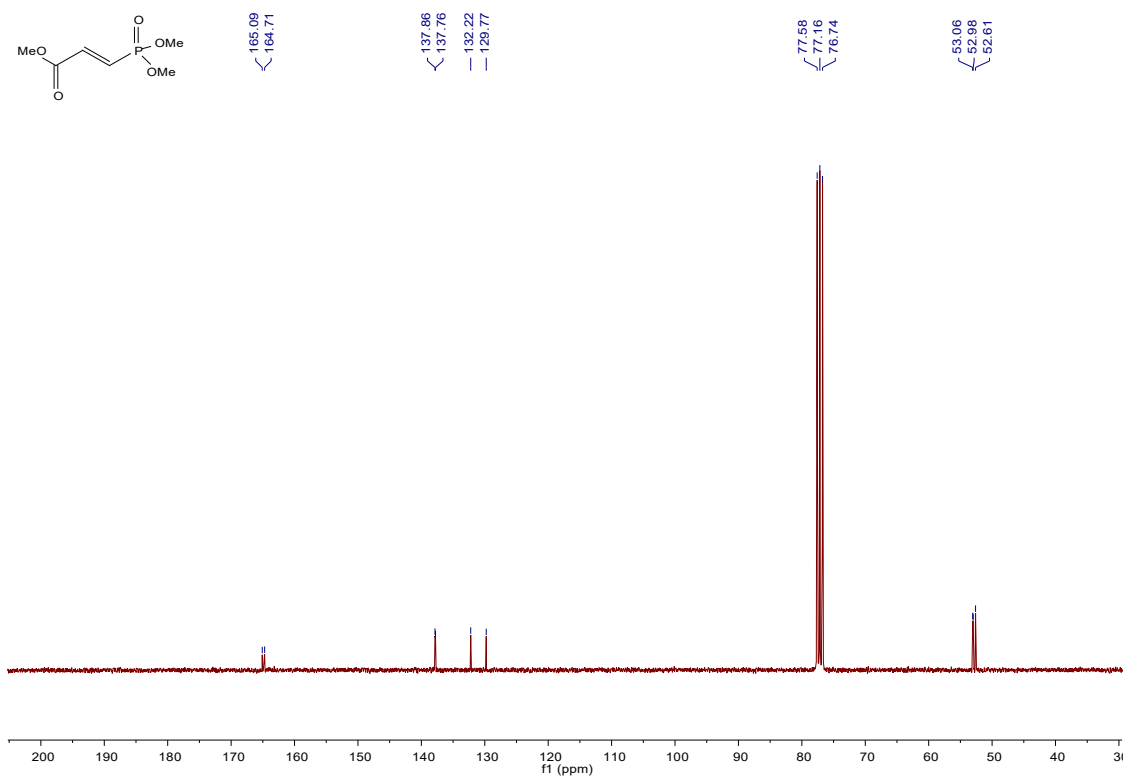

<sup>13</sup>C NMR of compound **3ab**

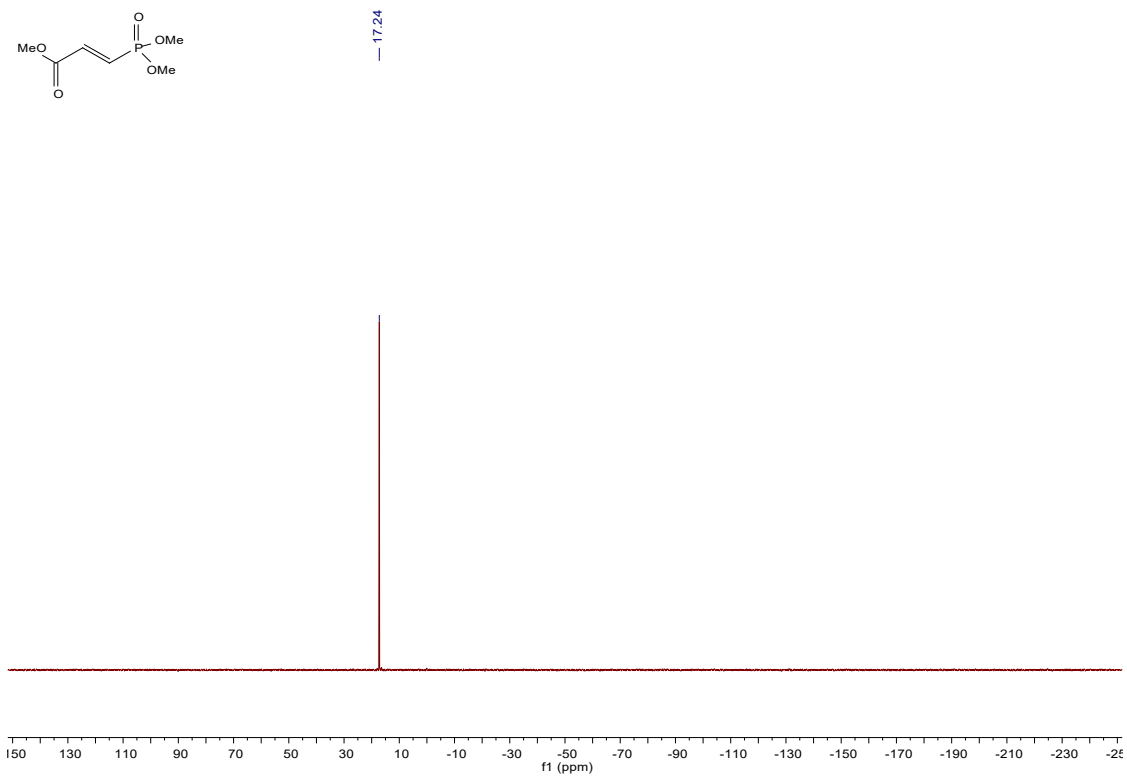

$^{31}\text{P}$  NMR of compound **3ab**

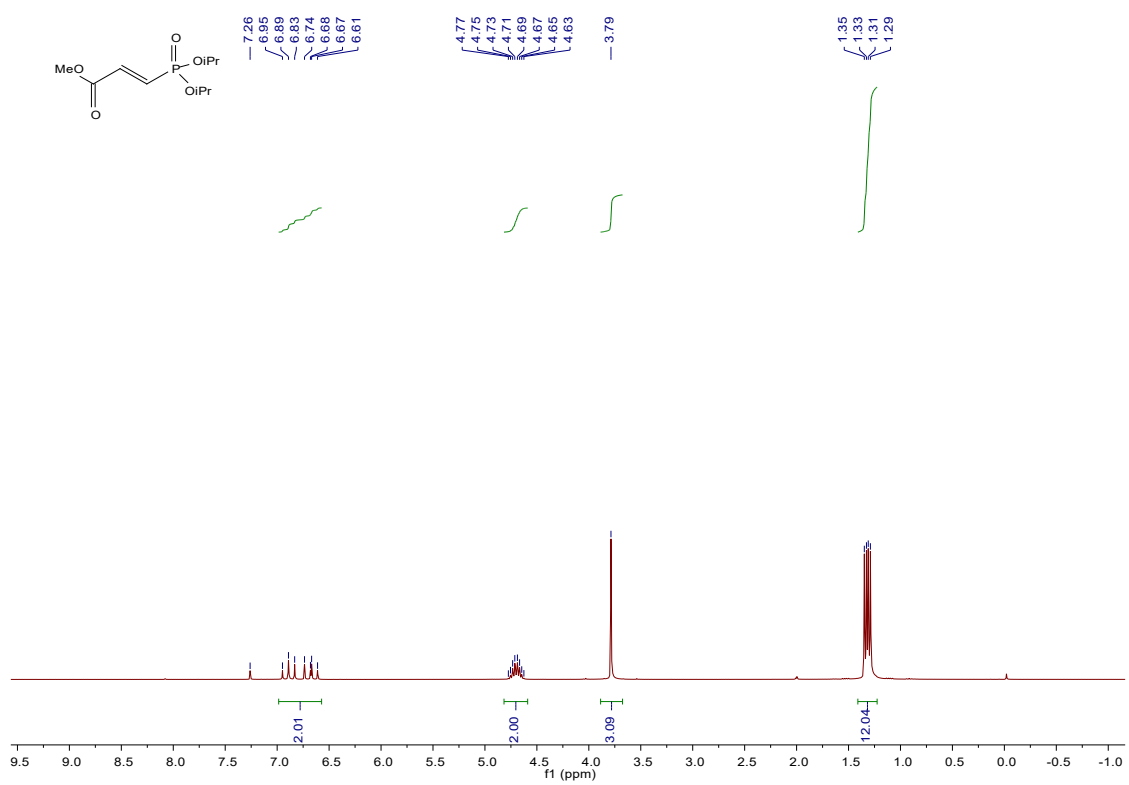

$^1\text{H}$  NMR of compound **3ac**



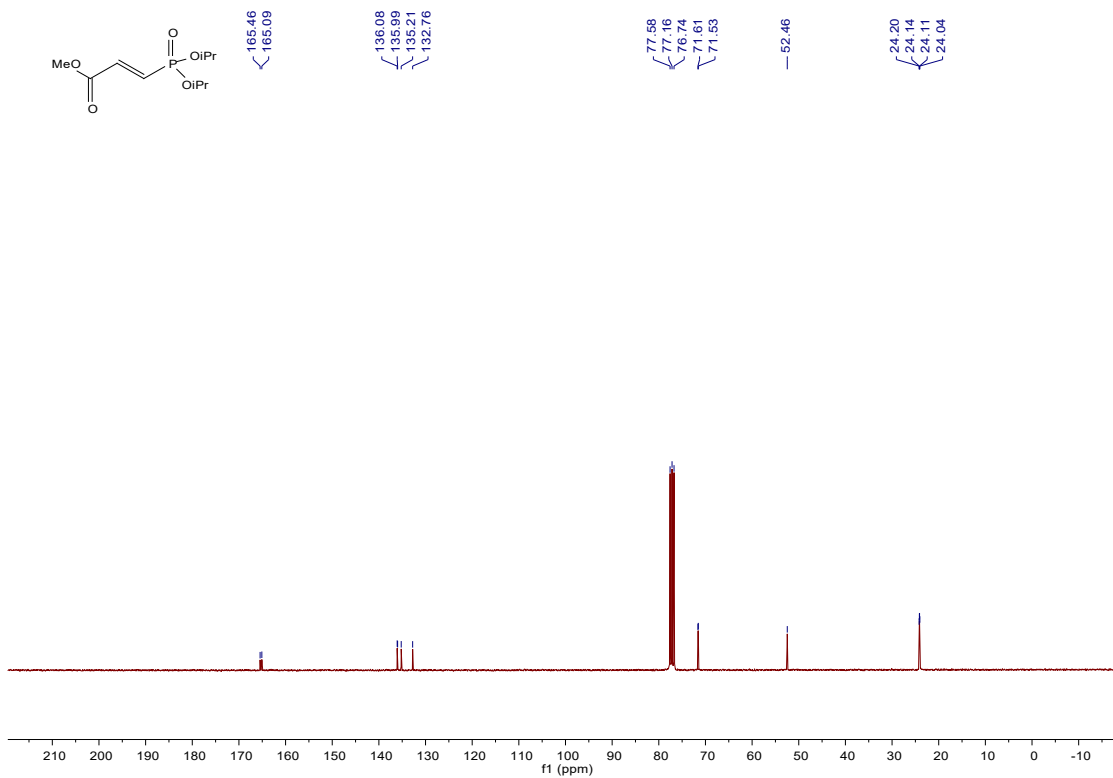

$^{13}\text{C}$  NMR of compound **3ac**

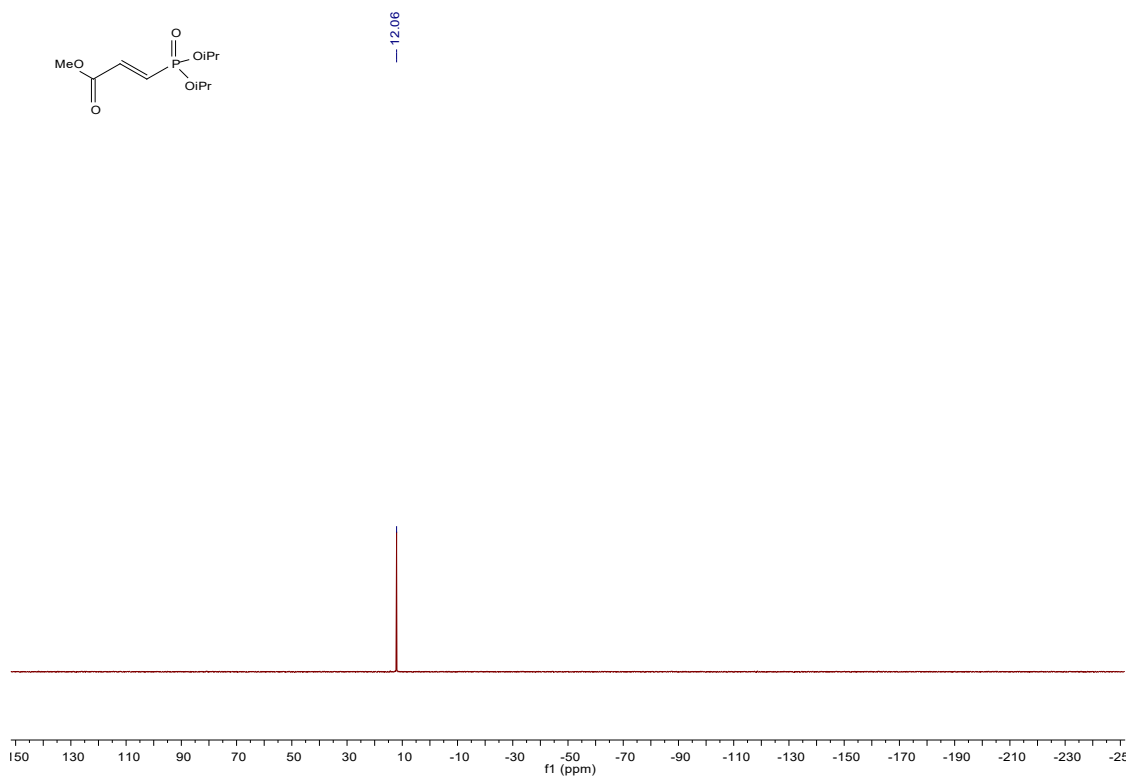

$^{31}\text{P}$  NMR of compound **3ac**

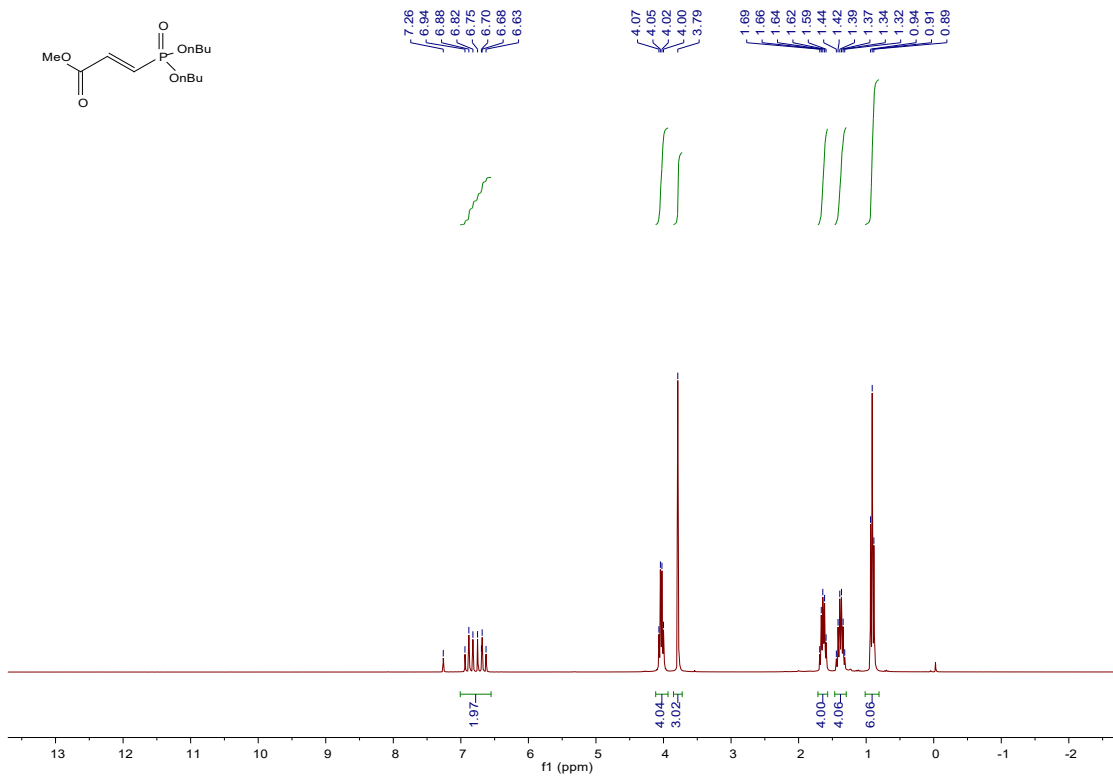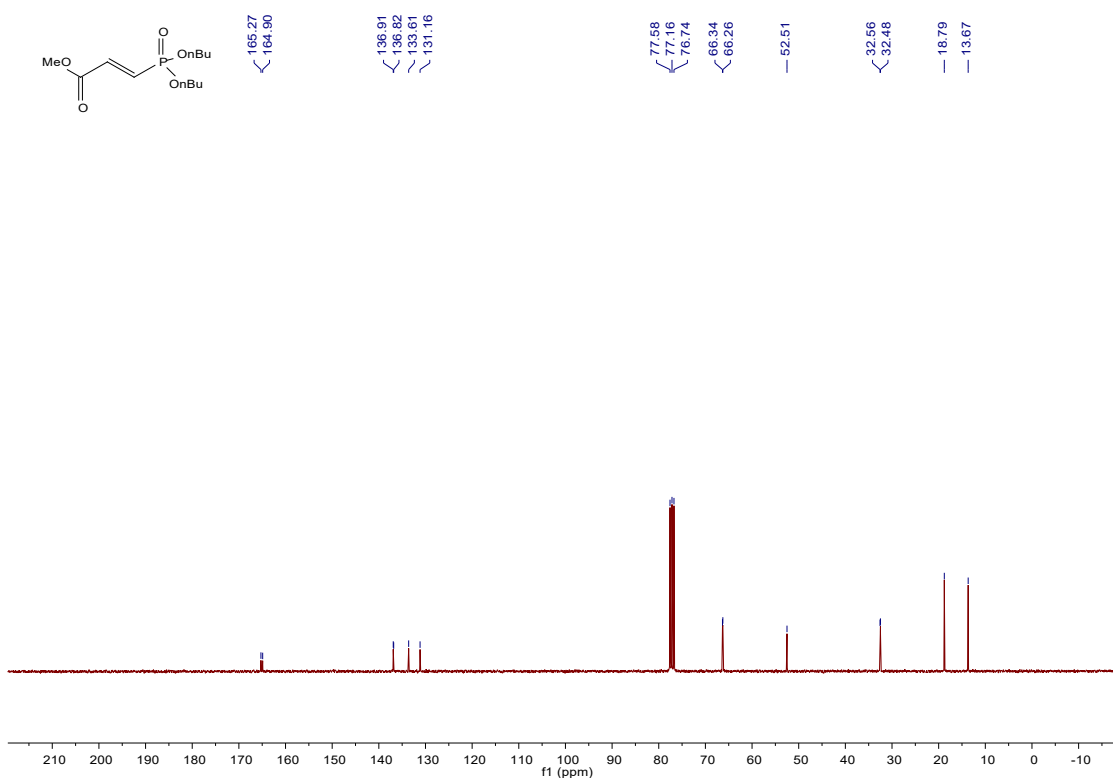

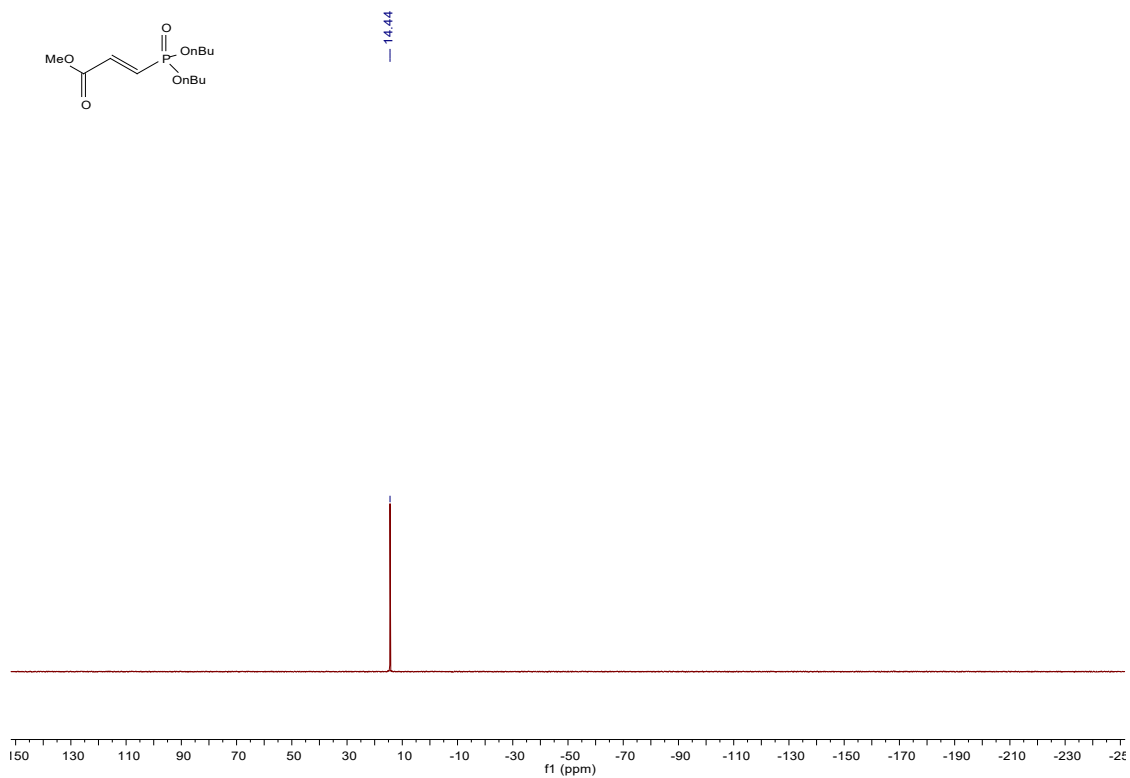

$^{31}\text{P}$  NMR of compound **3ad**

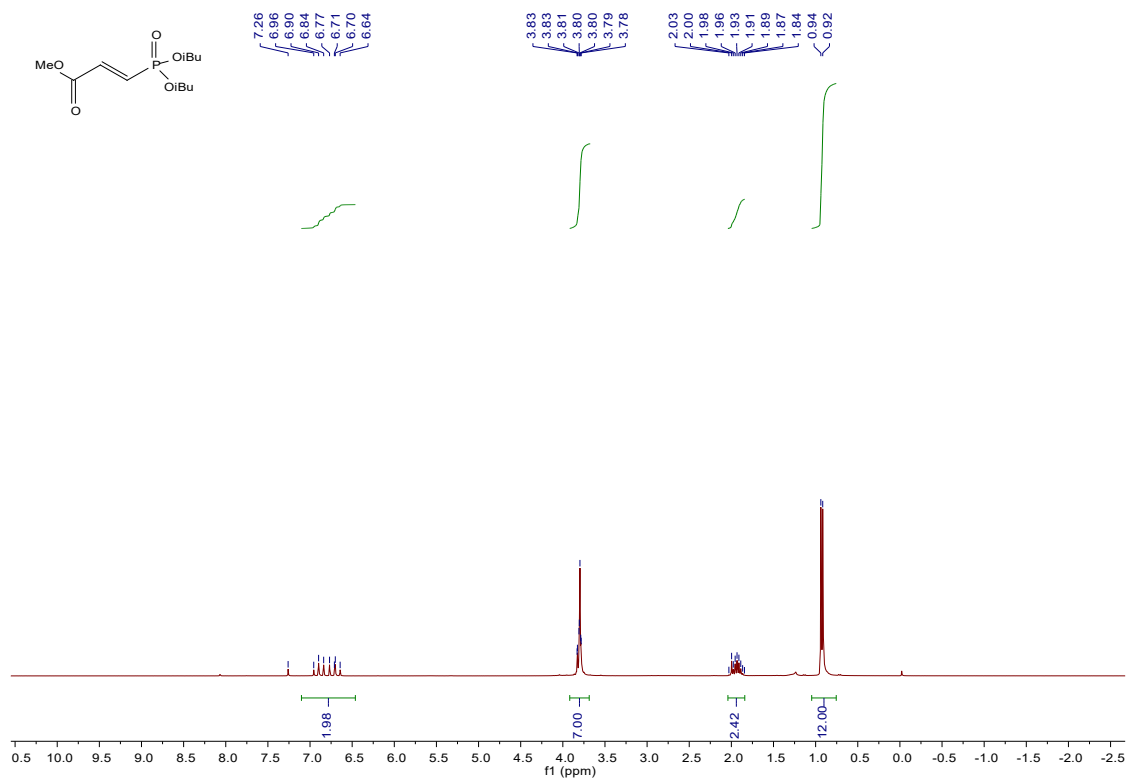

$^1\text{H}$  NMR of compound **3ae**

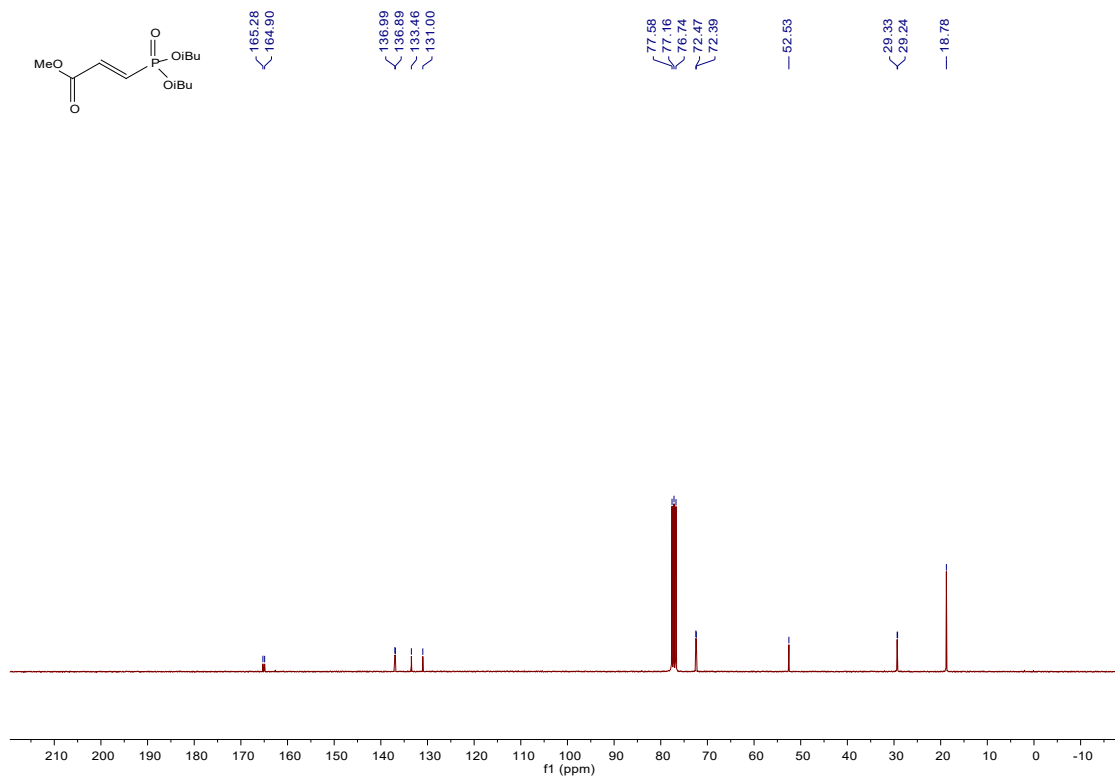

<sup>13</sup>C NMR of compound **3ae**

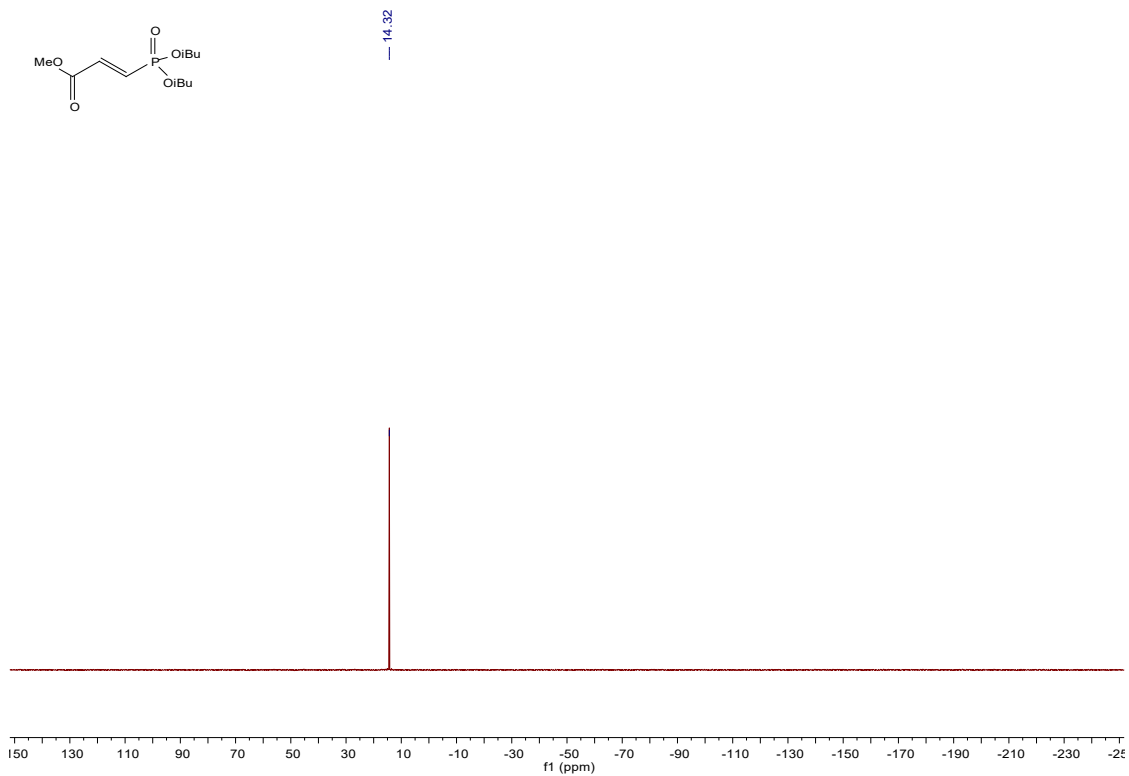

<sup>31</sup>P NMR of compound **3ae**

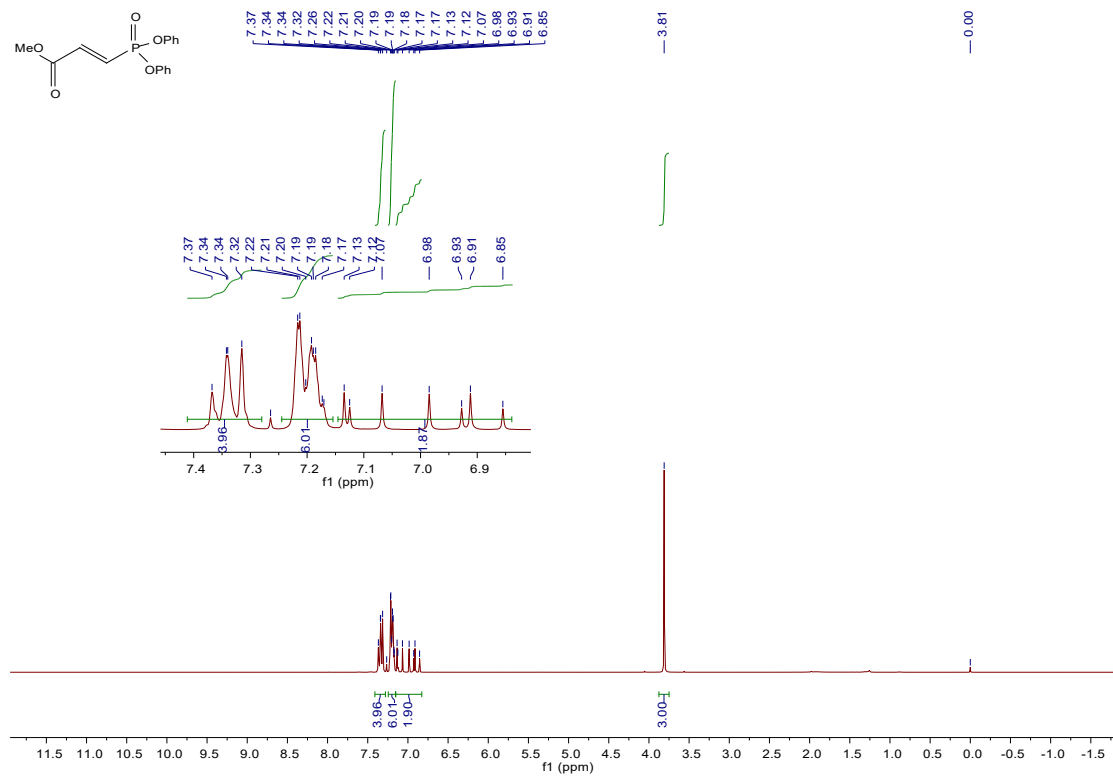

**<sup>1</sup>H NMR of compound 3af**

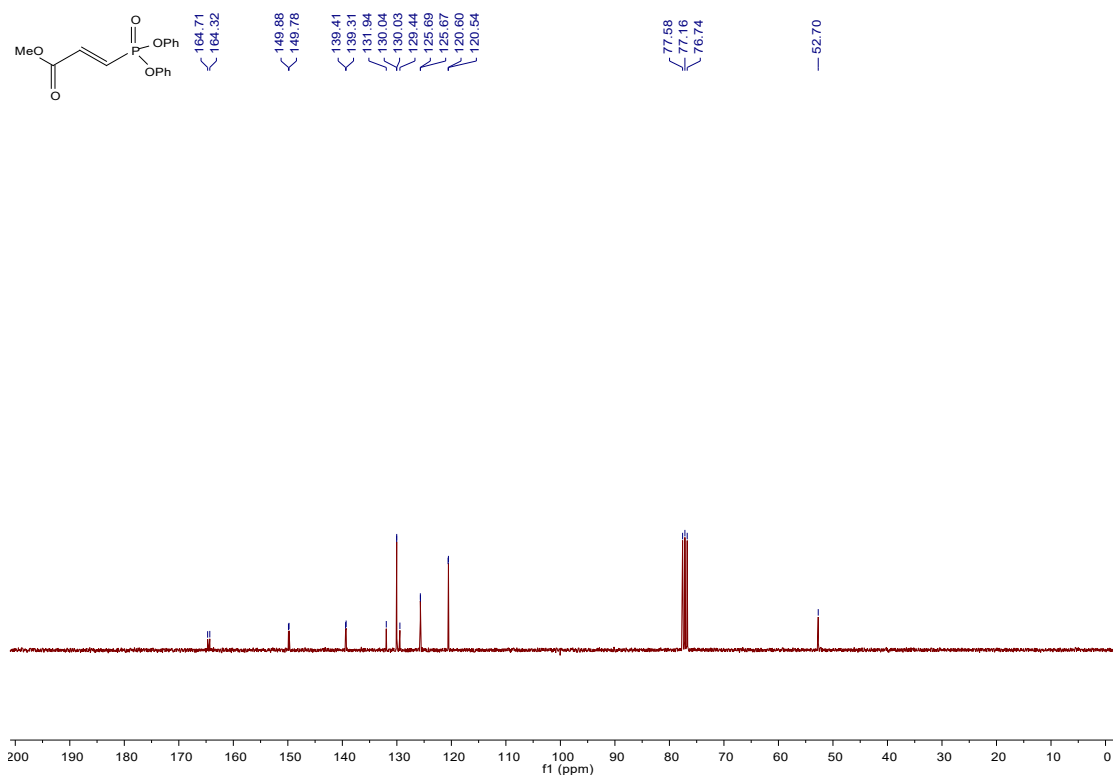

**<sup>13</sup>C NMR of compound 3af**

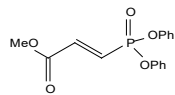

— 7.26

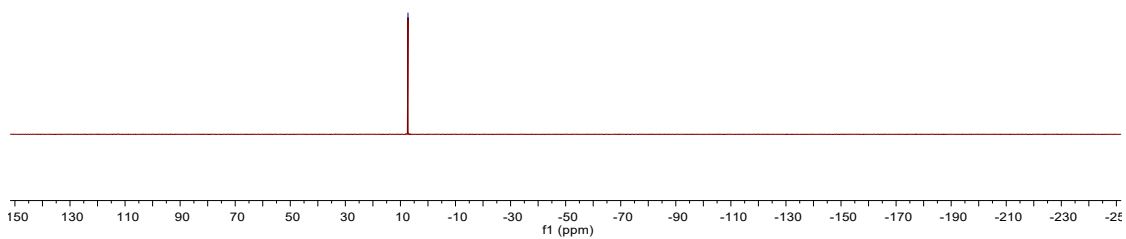

$^{31}\text{P}$  NMR of compound **3af**

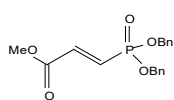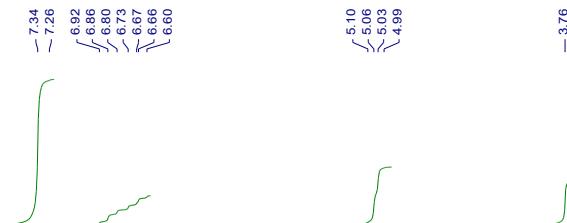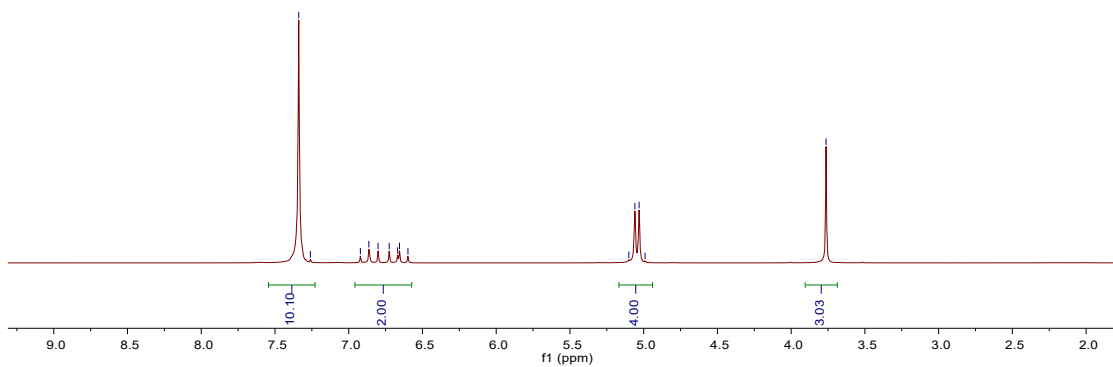

$^1\text{H}$  NMR of compound **3ag**

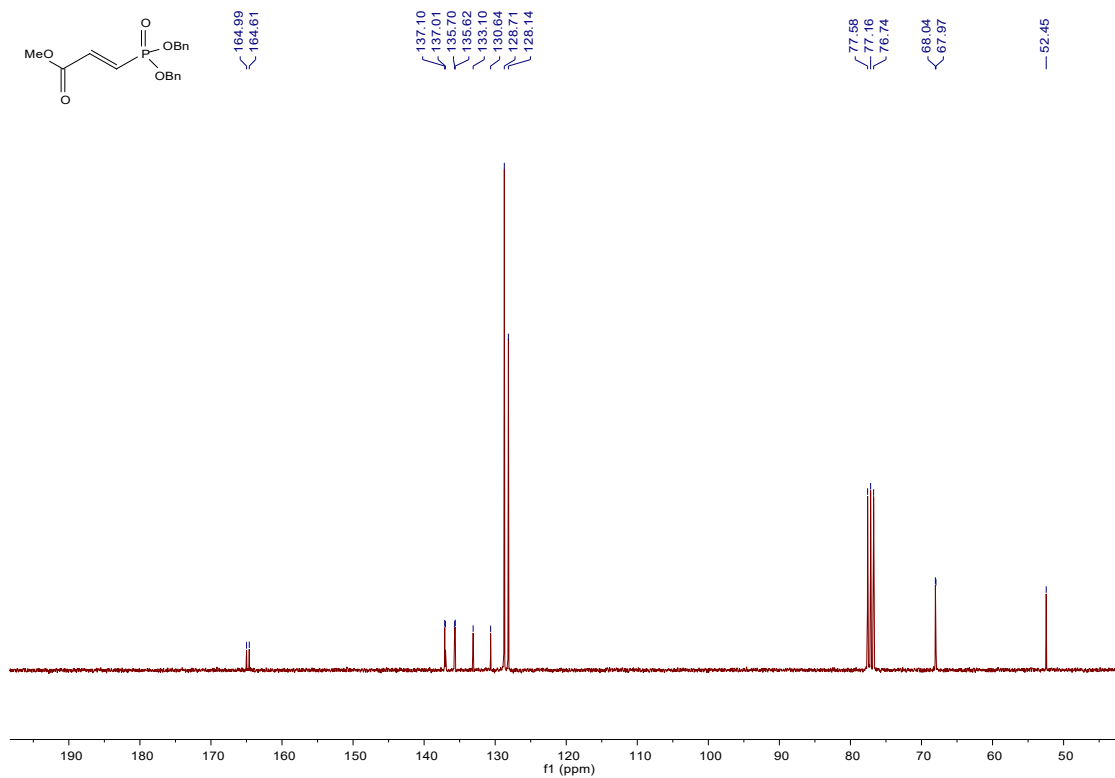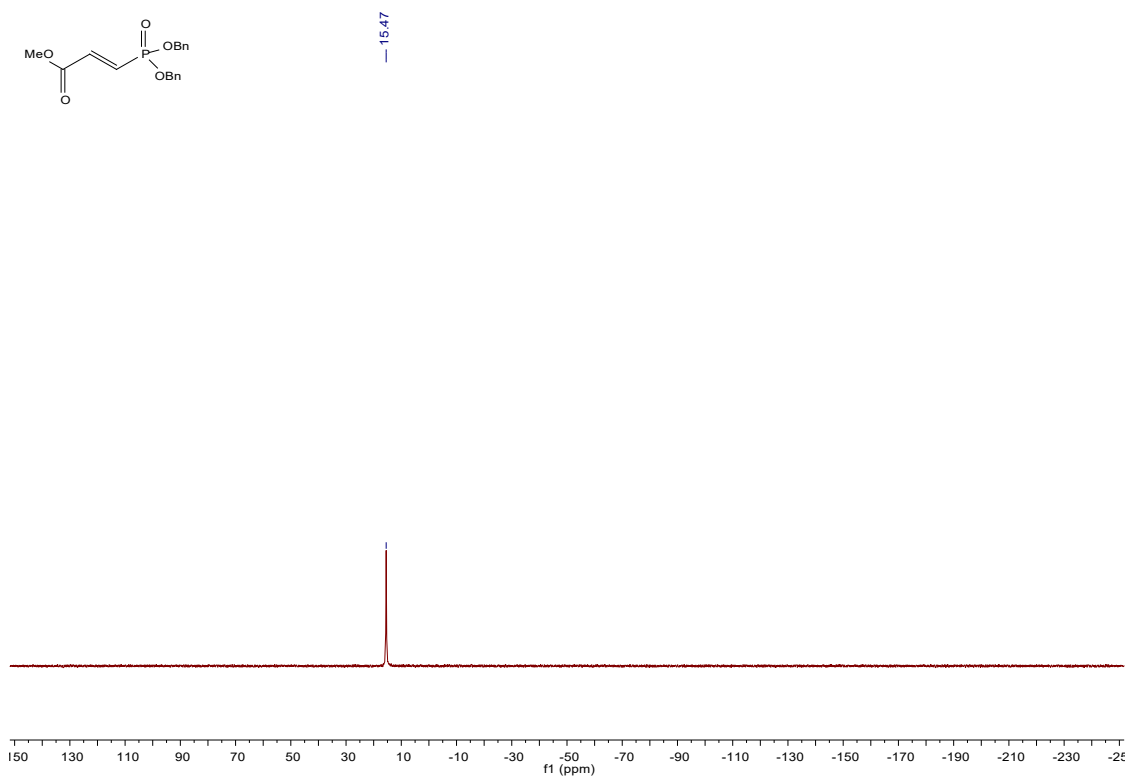

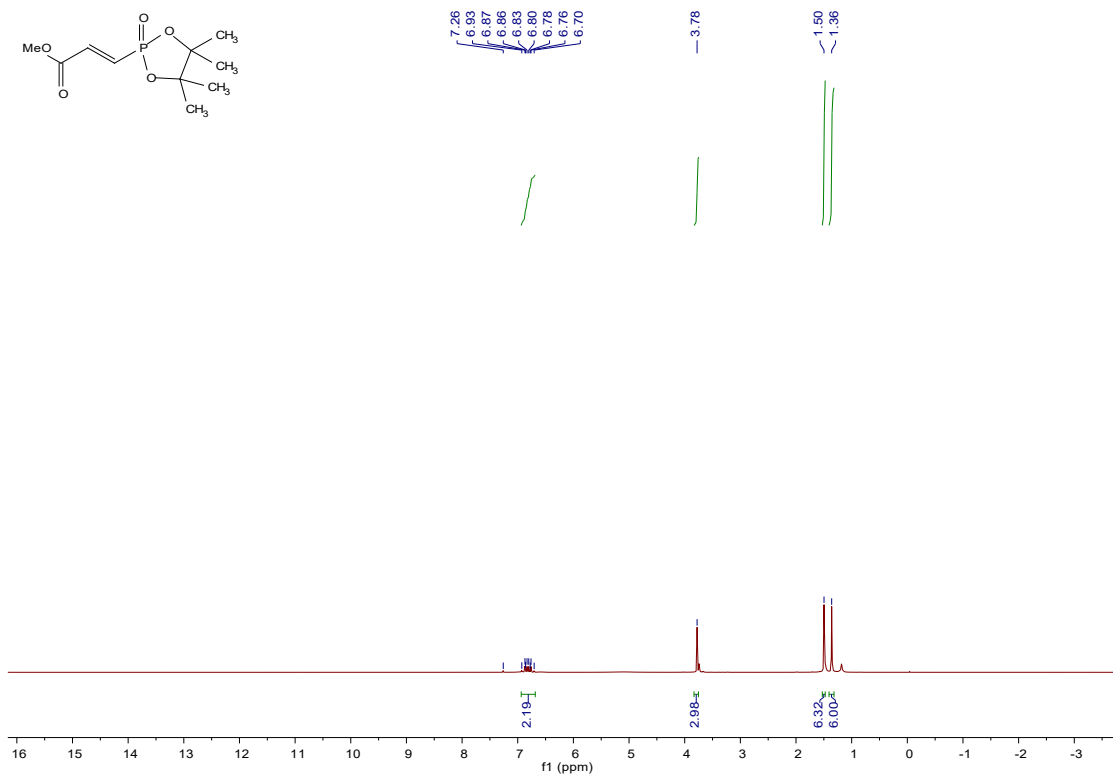

<sup>1</sup>H NMR of compound 3ah

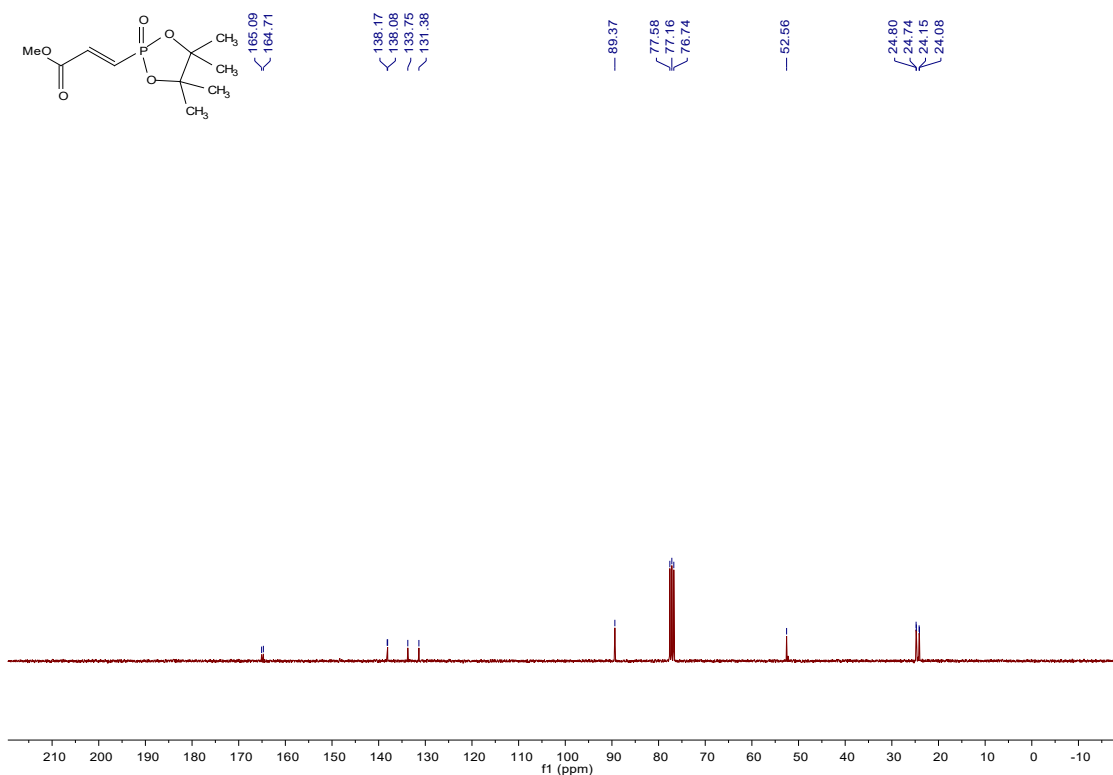

<sup>13</sup>C NMR of compound 3ah



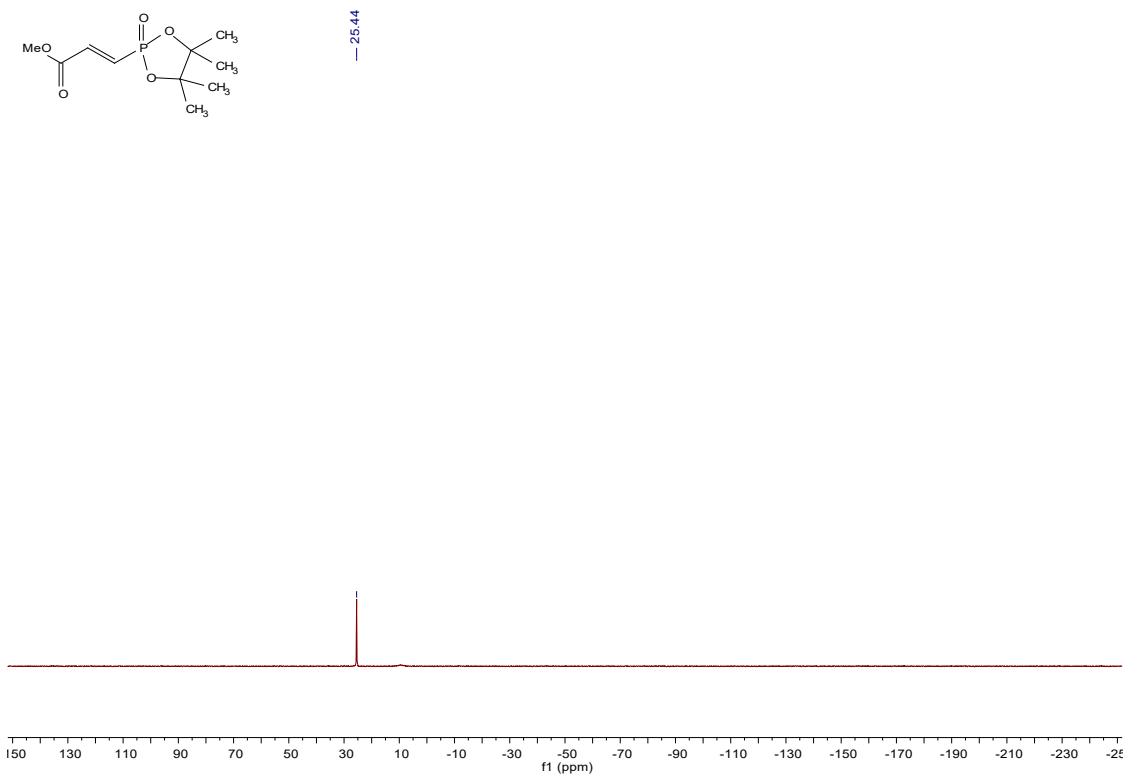

$^{31}\text{P}$  NMR of compound 3ah

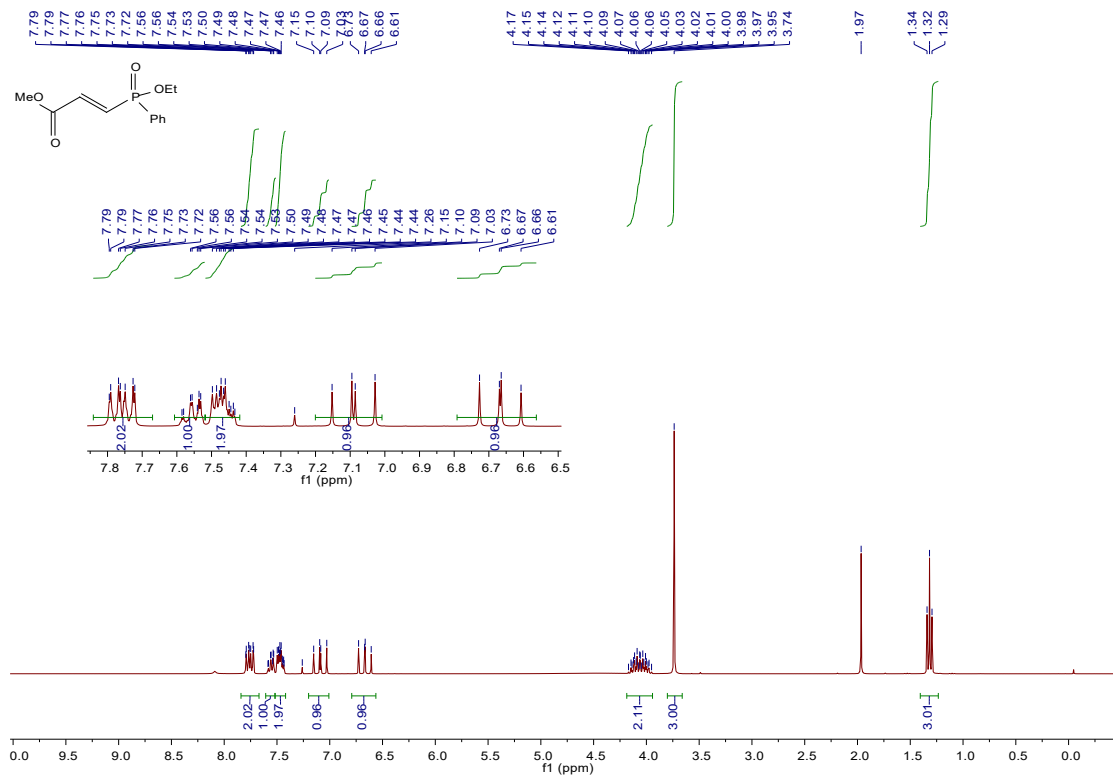

$^1\text{H}$  NMR of compound 3ai

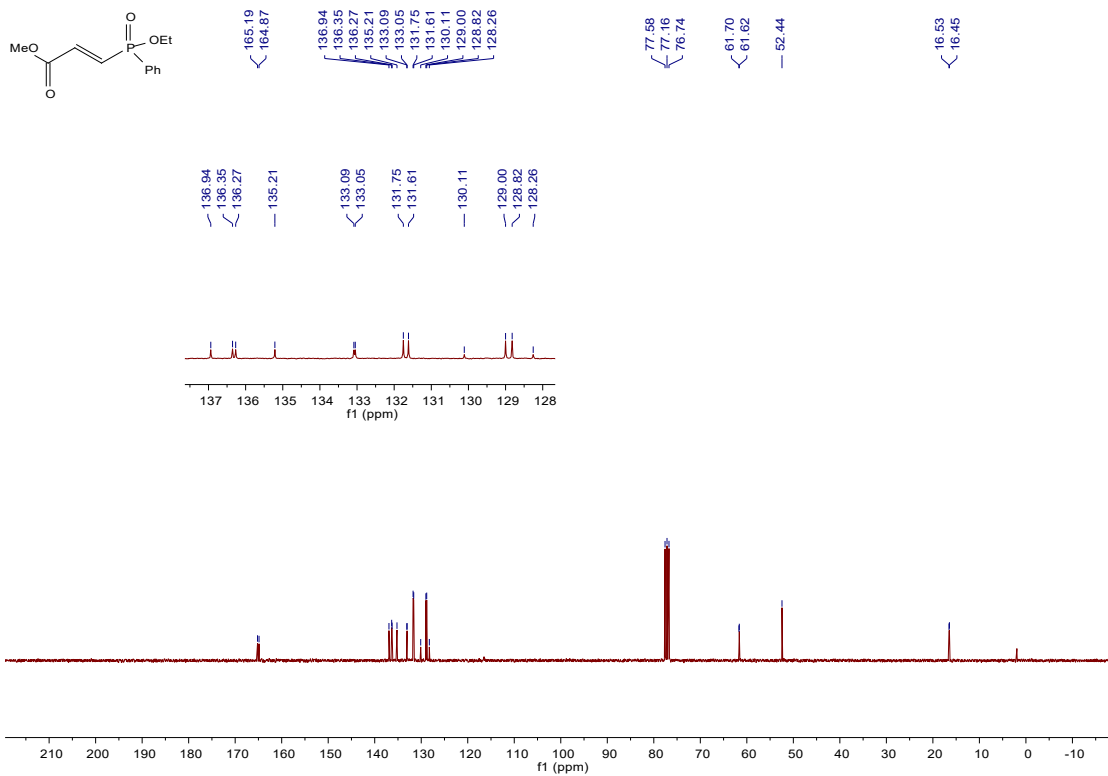

<sup>13</sup>C NMR of compound **3ai**

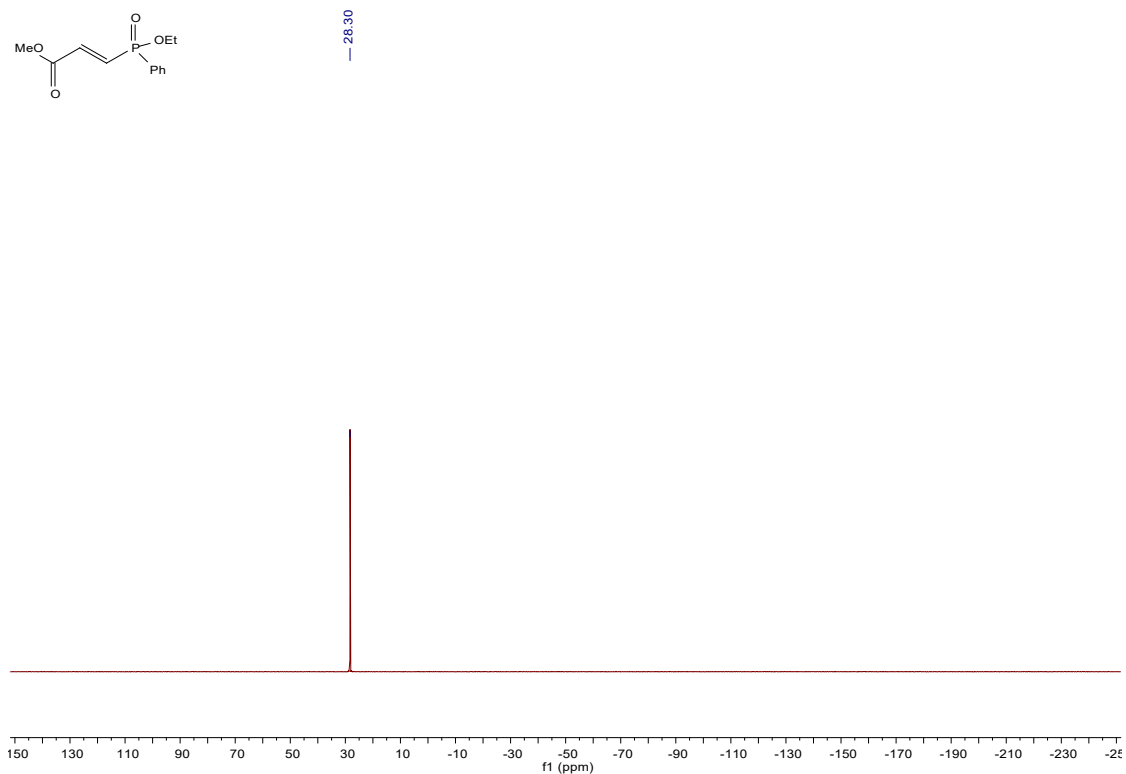

<sup>31</sup>P NMR of compound **3ai**

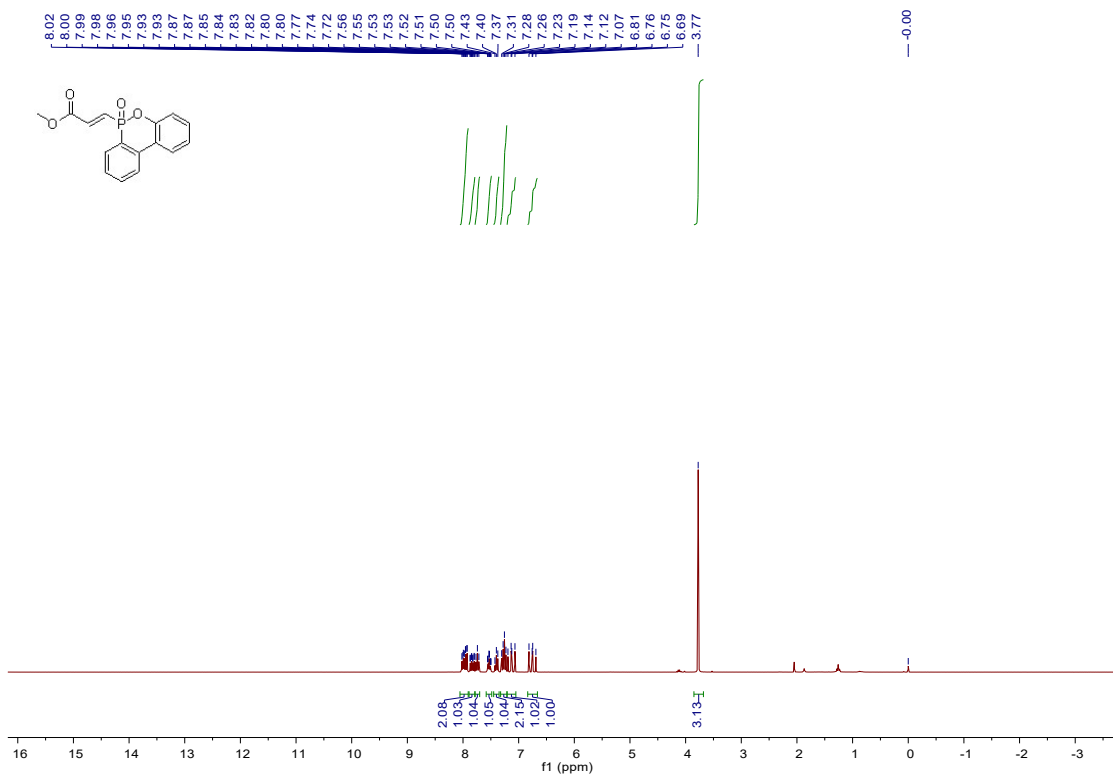

<sup>1</sup>H NMR of compound 3aj

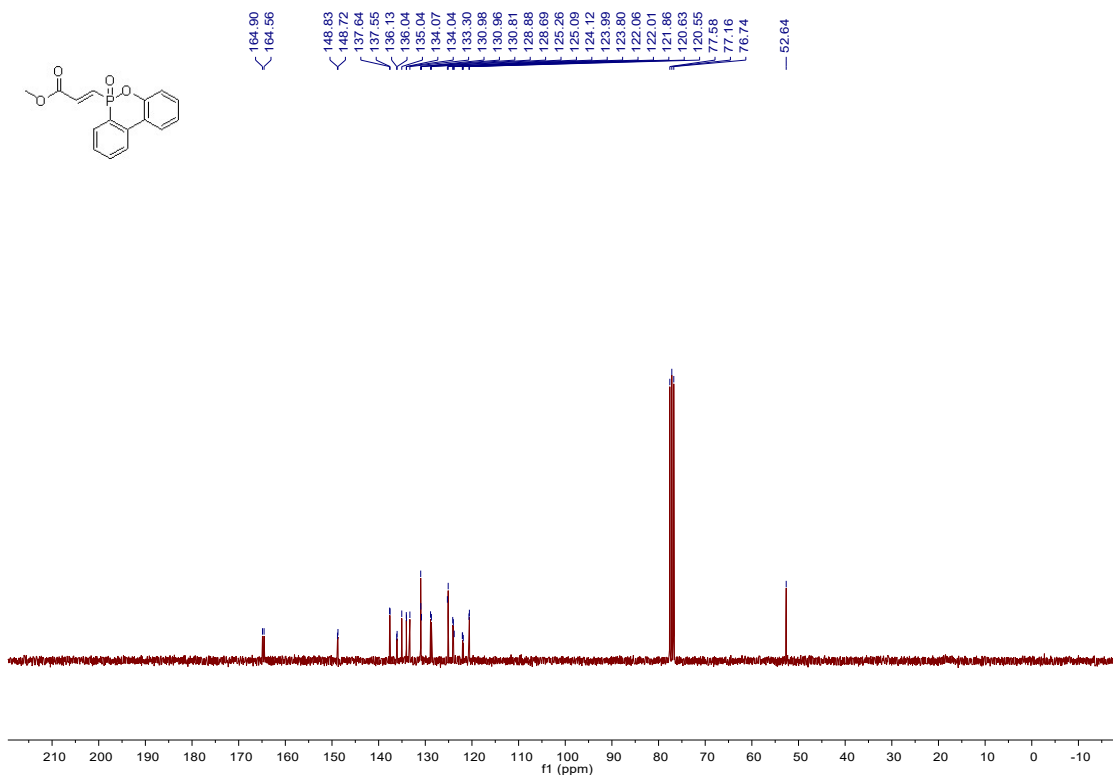

<sup>13</sup>C NMR of compound 3aj

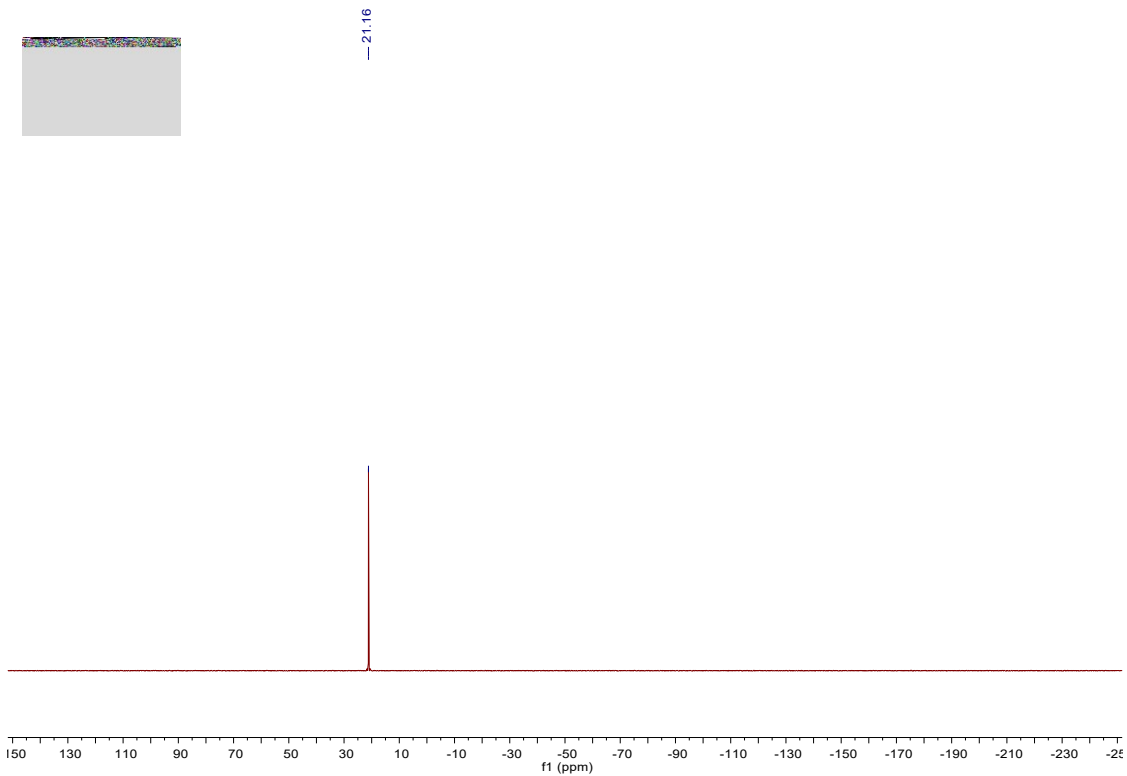

31P NMR of compound 3aj

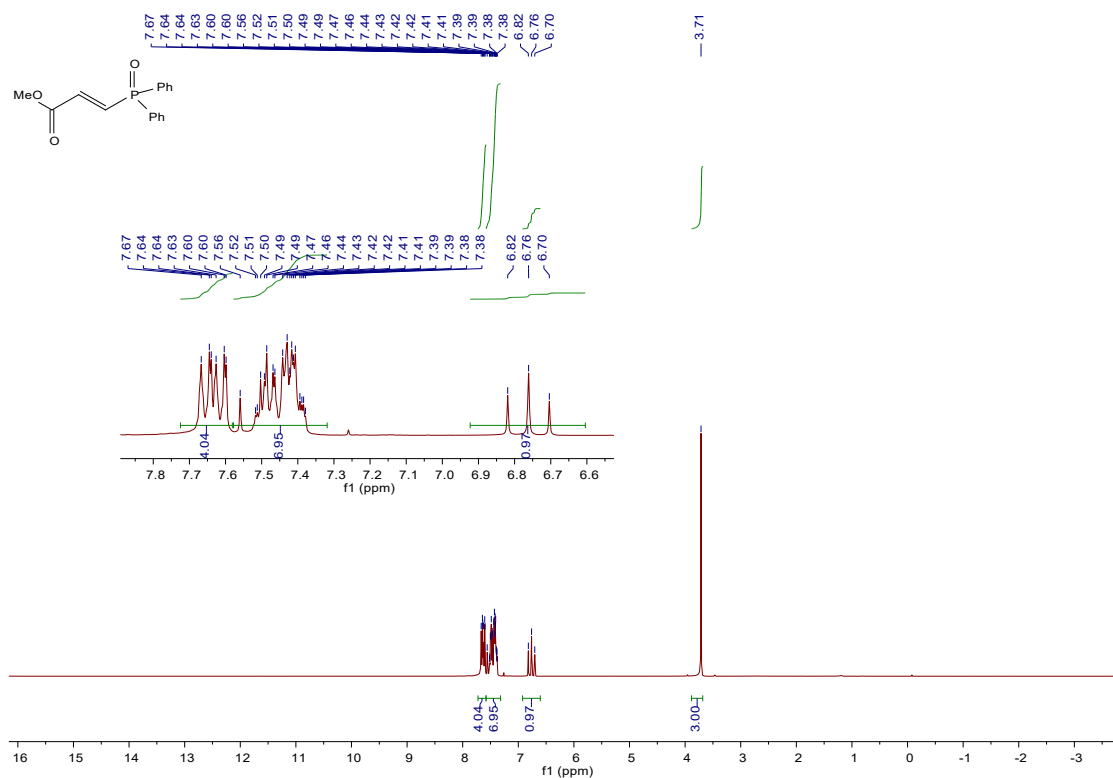

1H NMR of compound 3ak

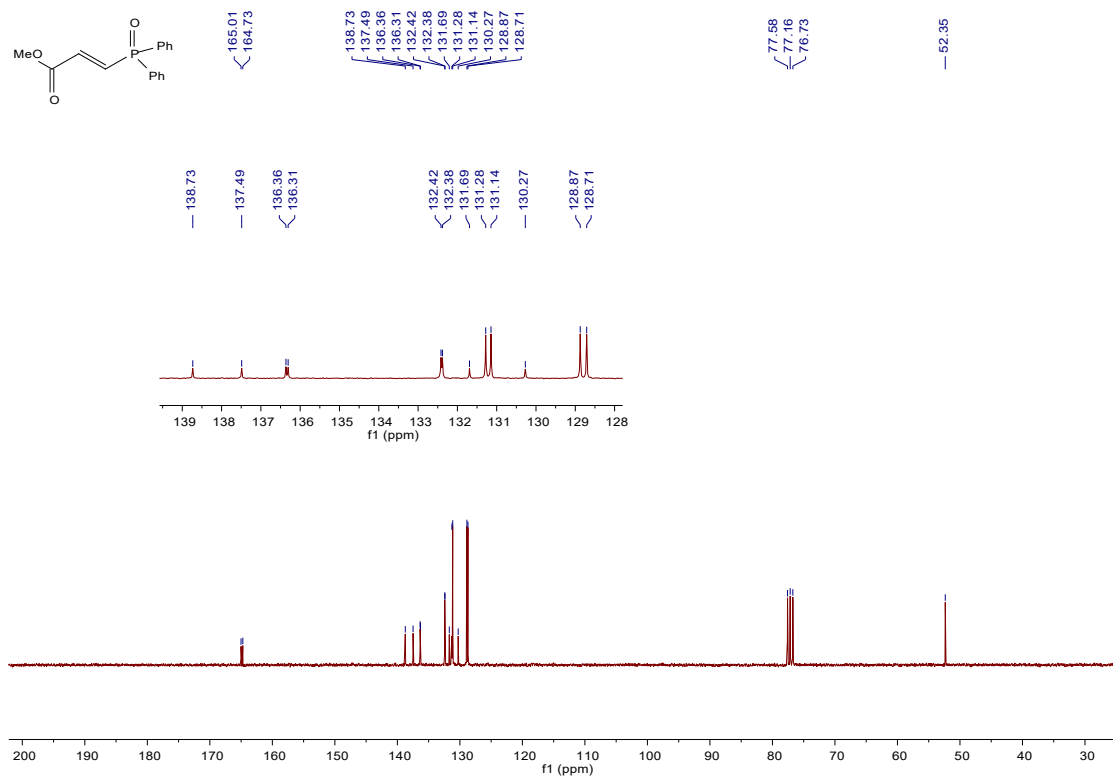

<sup>13</sup>C NMR of compound **3ak**

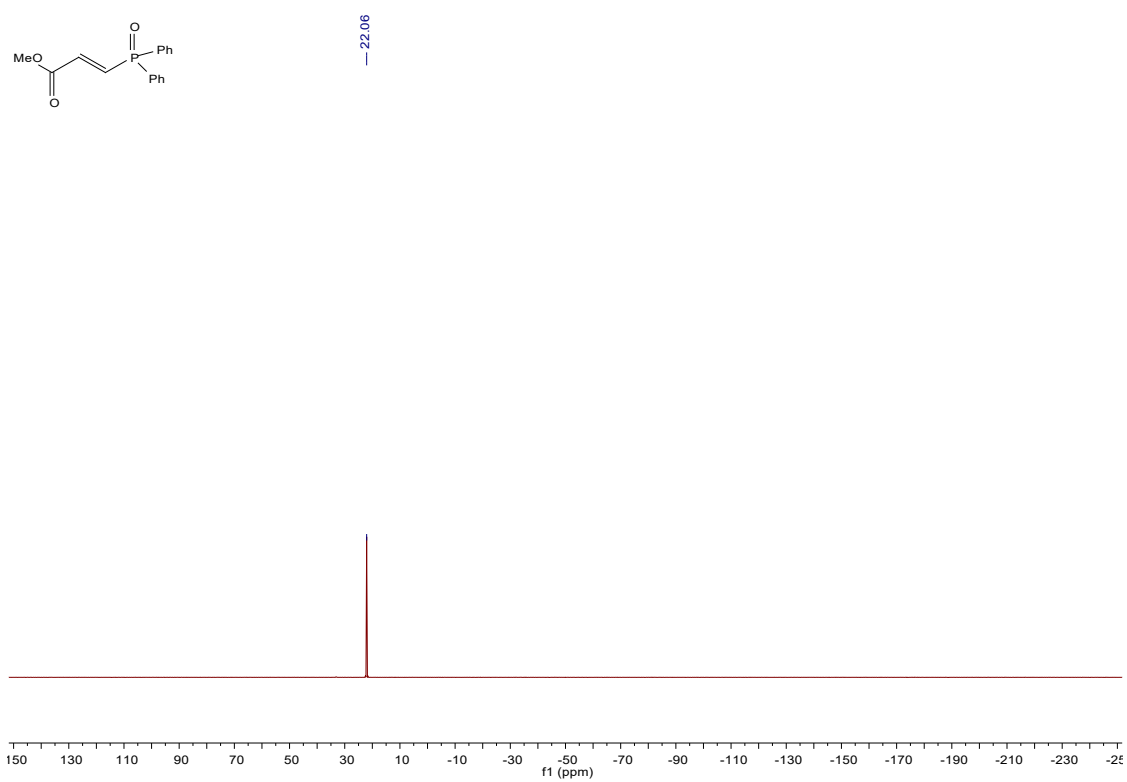

<sup>31</sup>P NMR of compound **3ak**

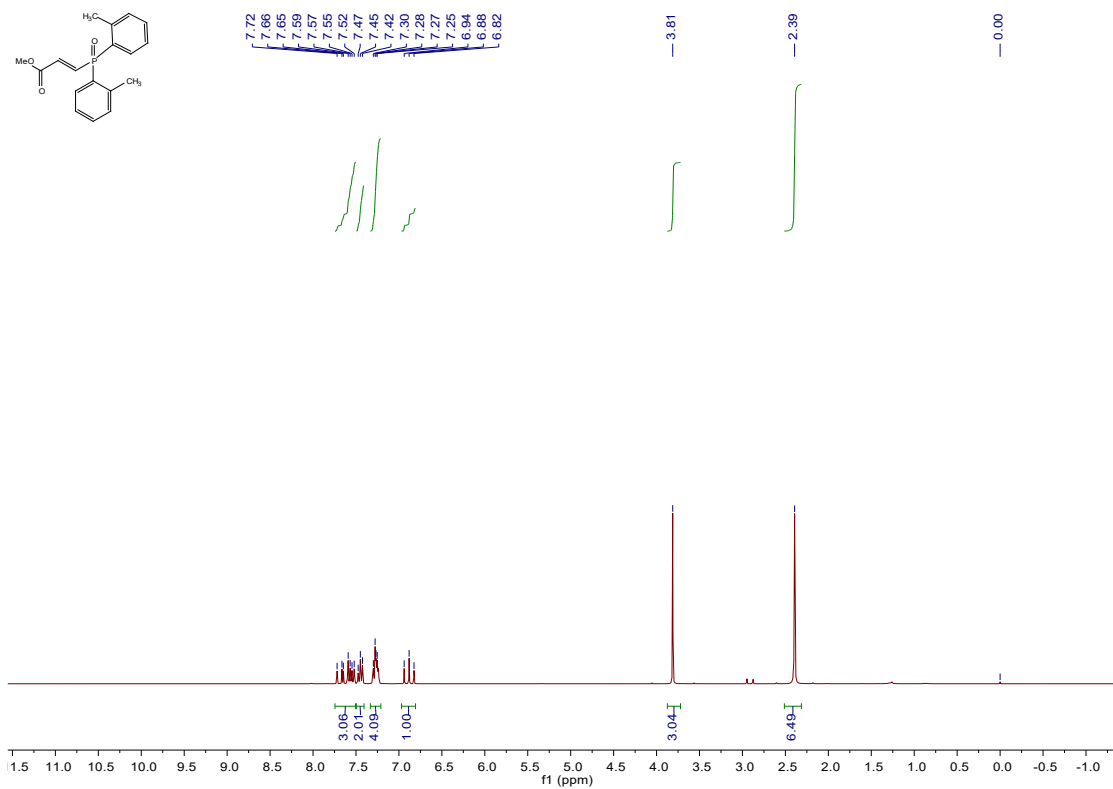

<sup>1</sup>H NMR of compound 3al

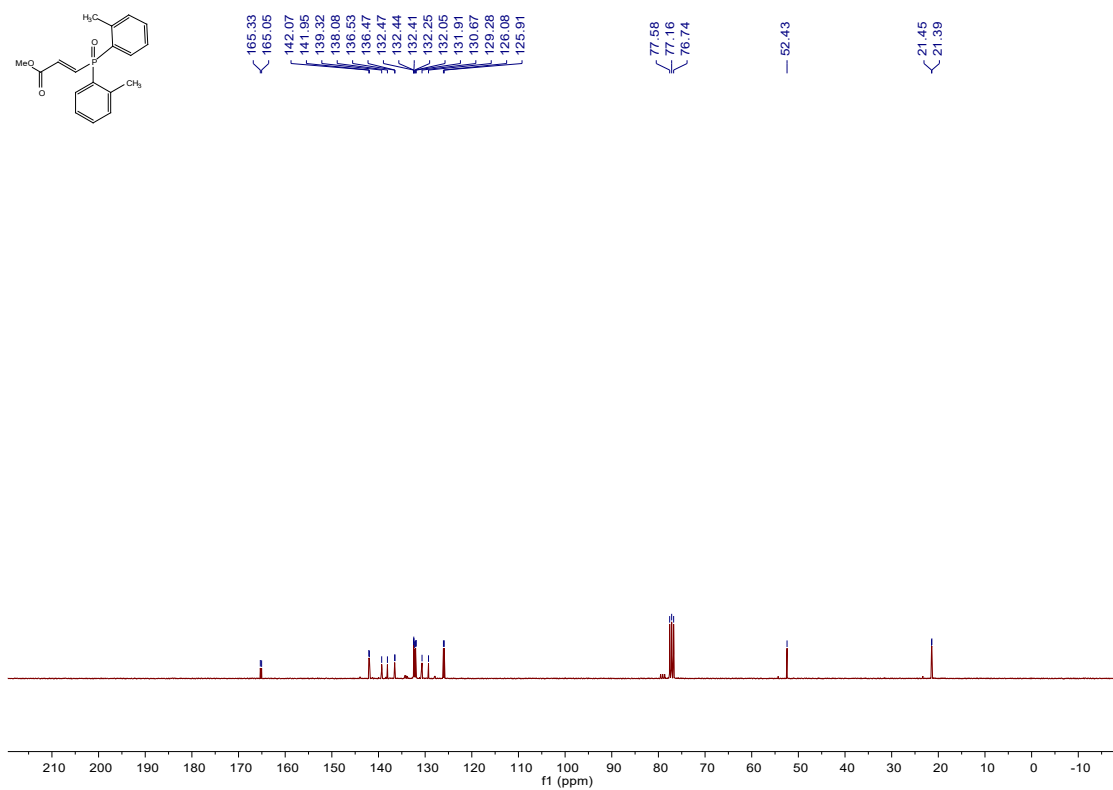

<sup>13</sup>C NMR of compound 3al

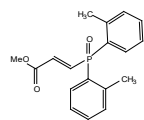

— 24.70

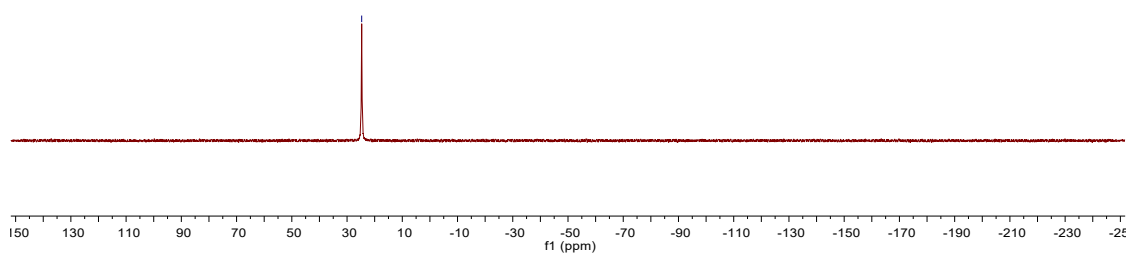

<sup>31</sup>P NMR of compound **3al**

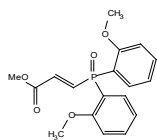

7.77  
7.72  
7.70  
7.64  
7.61  
7.59  
7.57  
7.54  
7.45  
7.42  
7.40  
7.26  
6.98  
6.96  
6.94  
6.89  
6.85  
6.80

3.70  
3.60

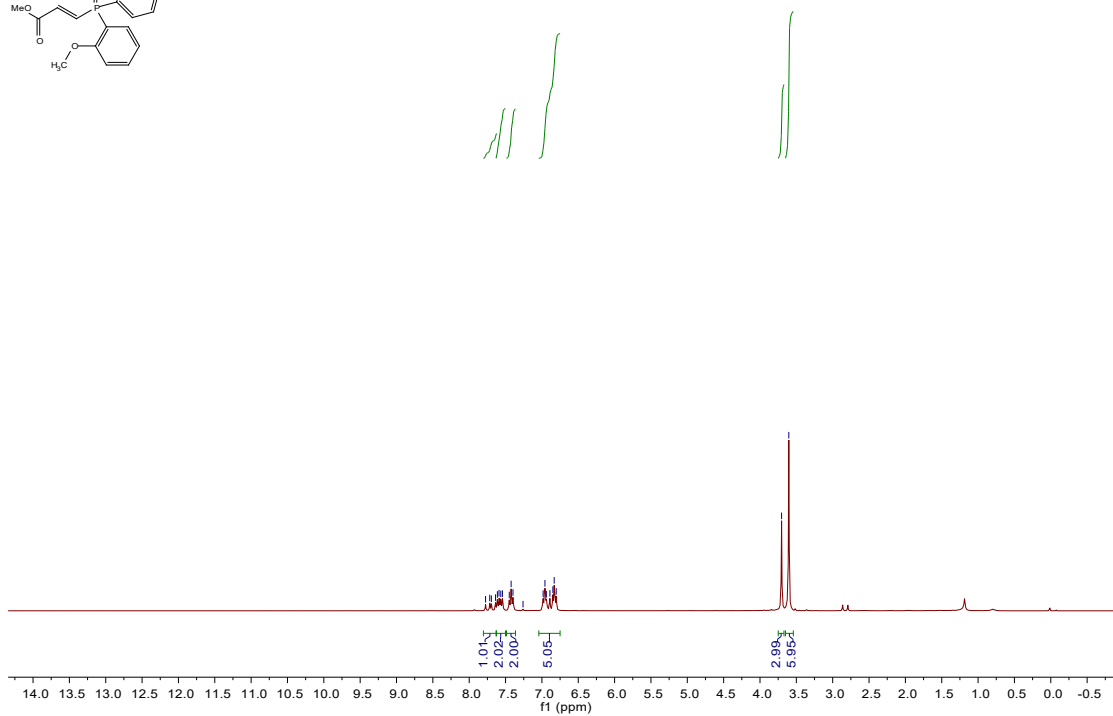

<sup>1</sup>H NMR of compound **3am**

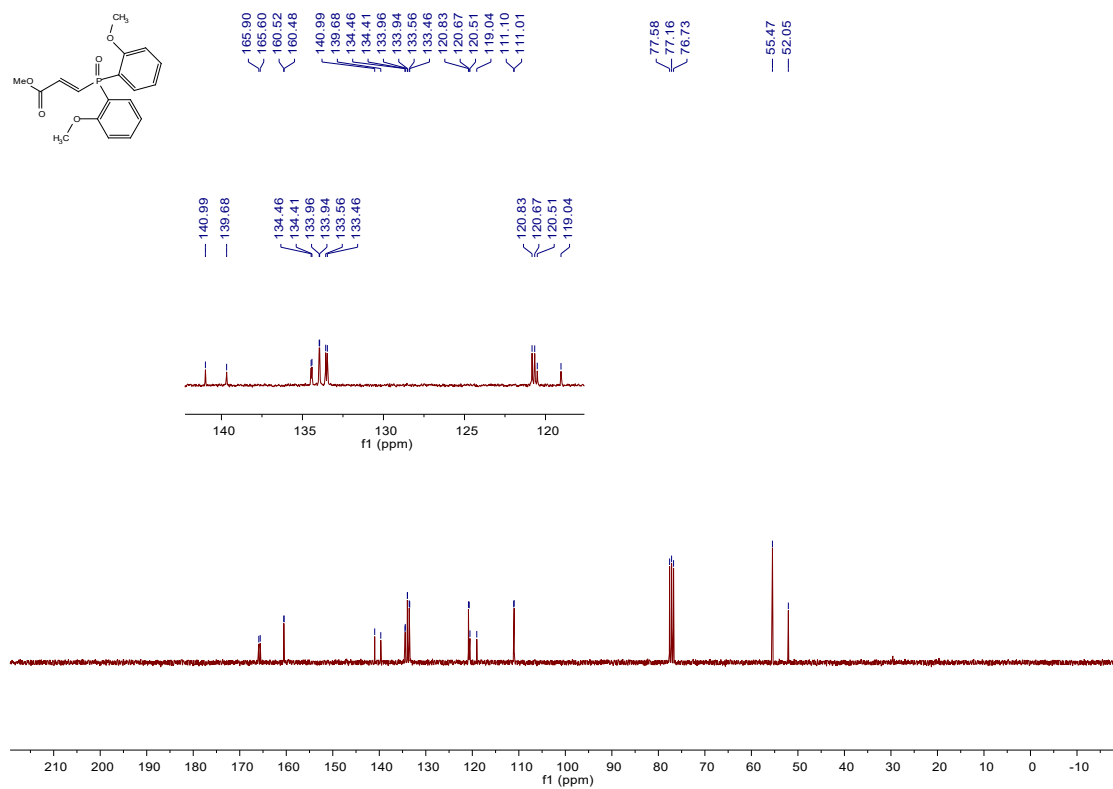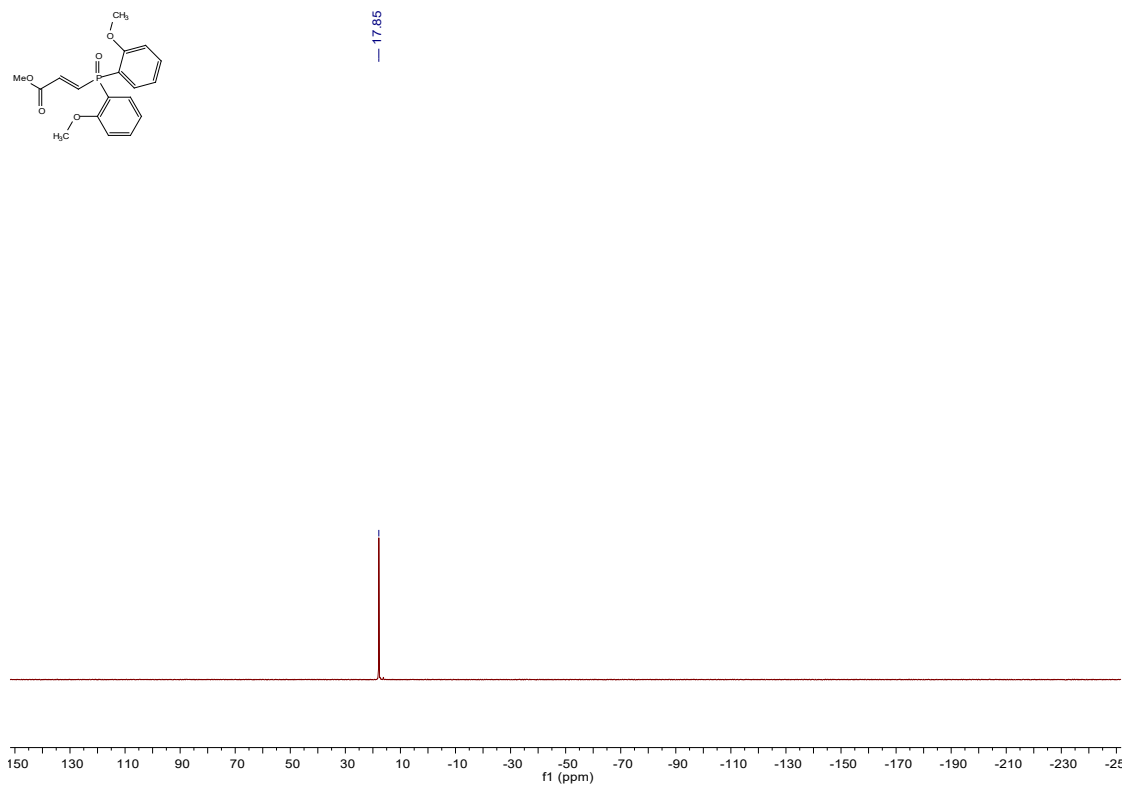



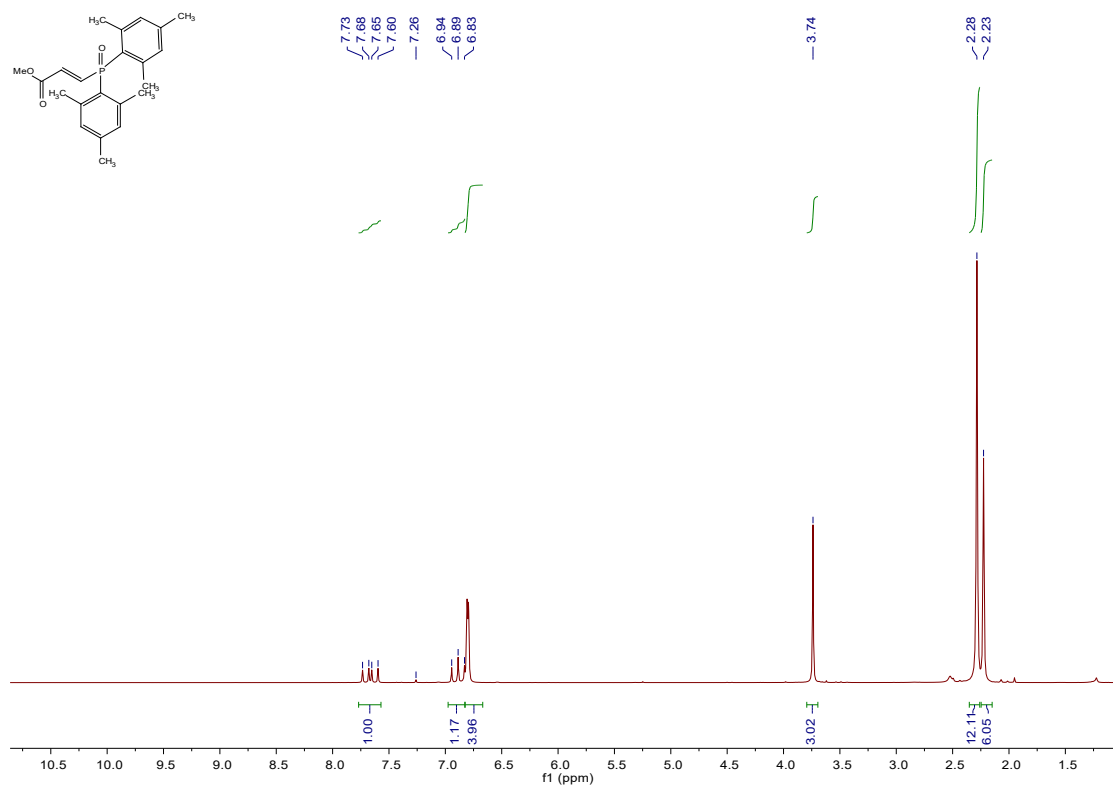

<sup>1</sup>H NMR of compound 3an

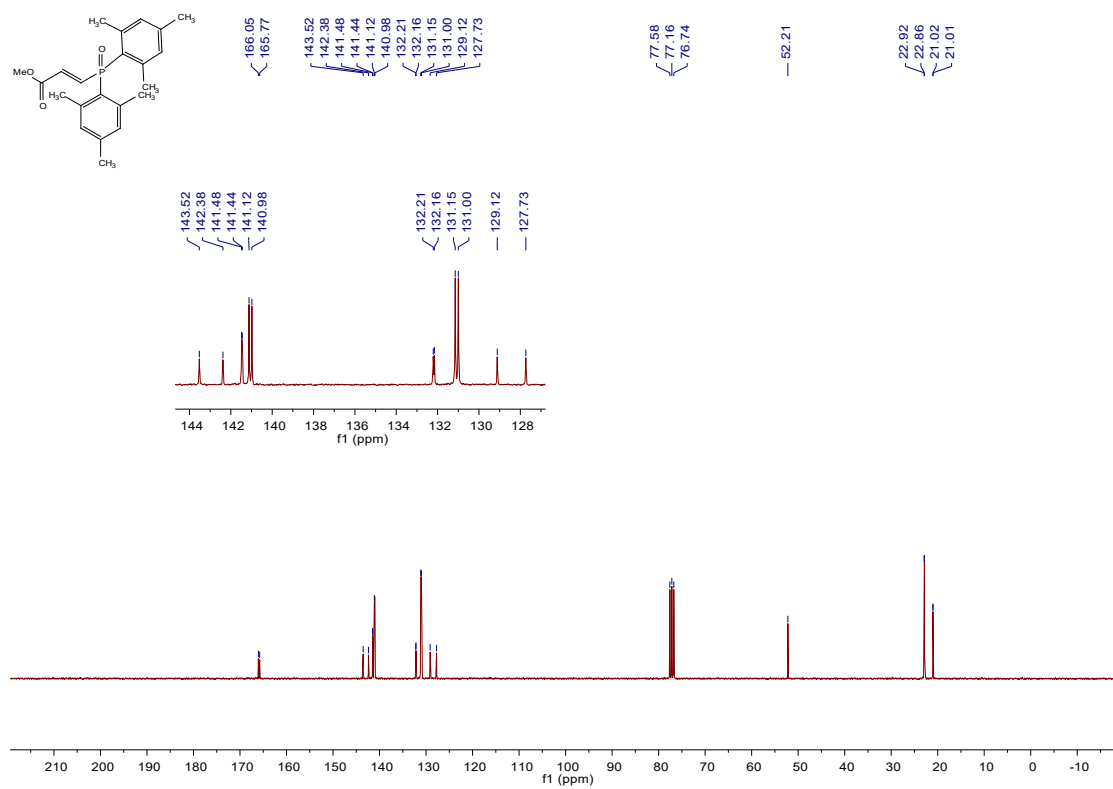

<sup>13</sup>C NMR of compound 3an

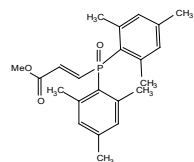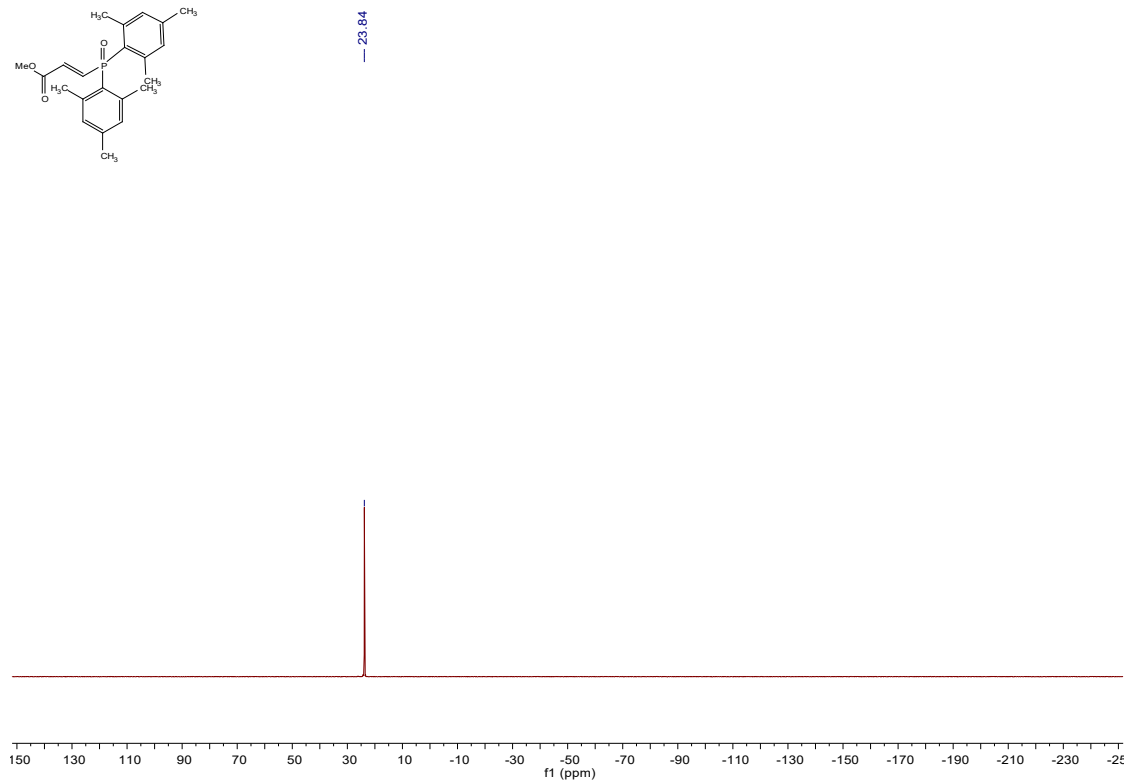

<sup>31</sup>P NMR of compound **3an**

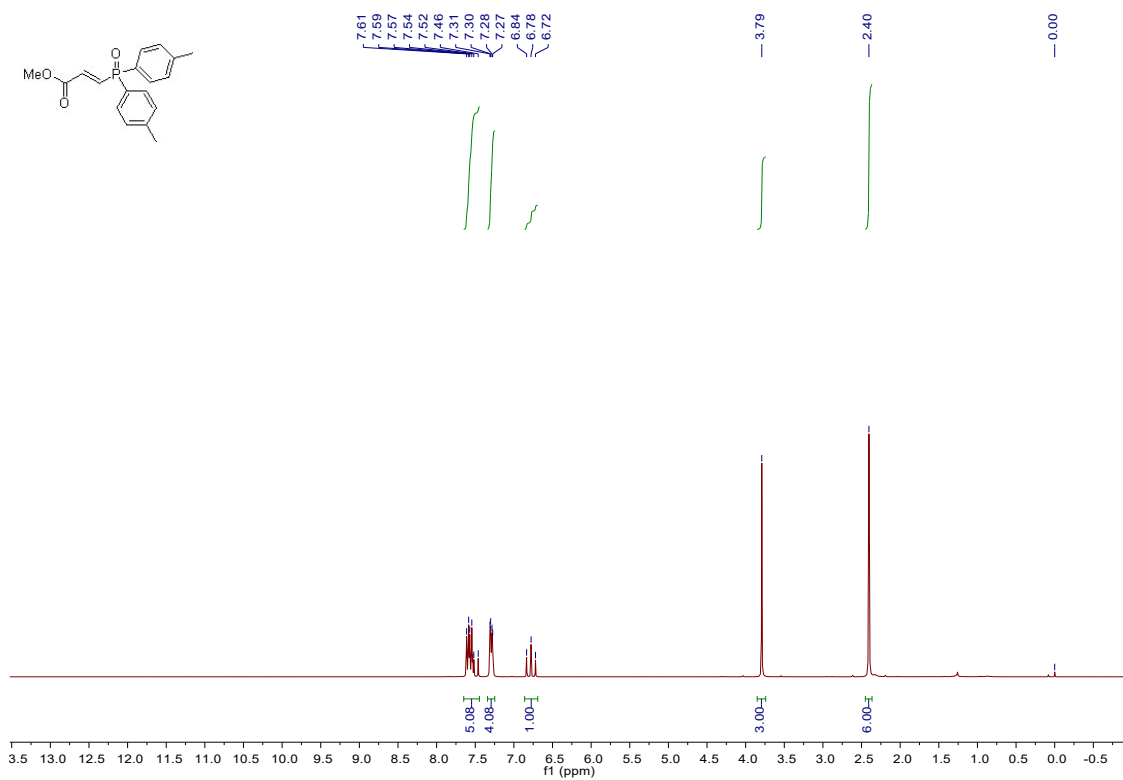

<sup>1</sup>H NMR of compound **3ao**

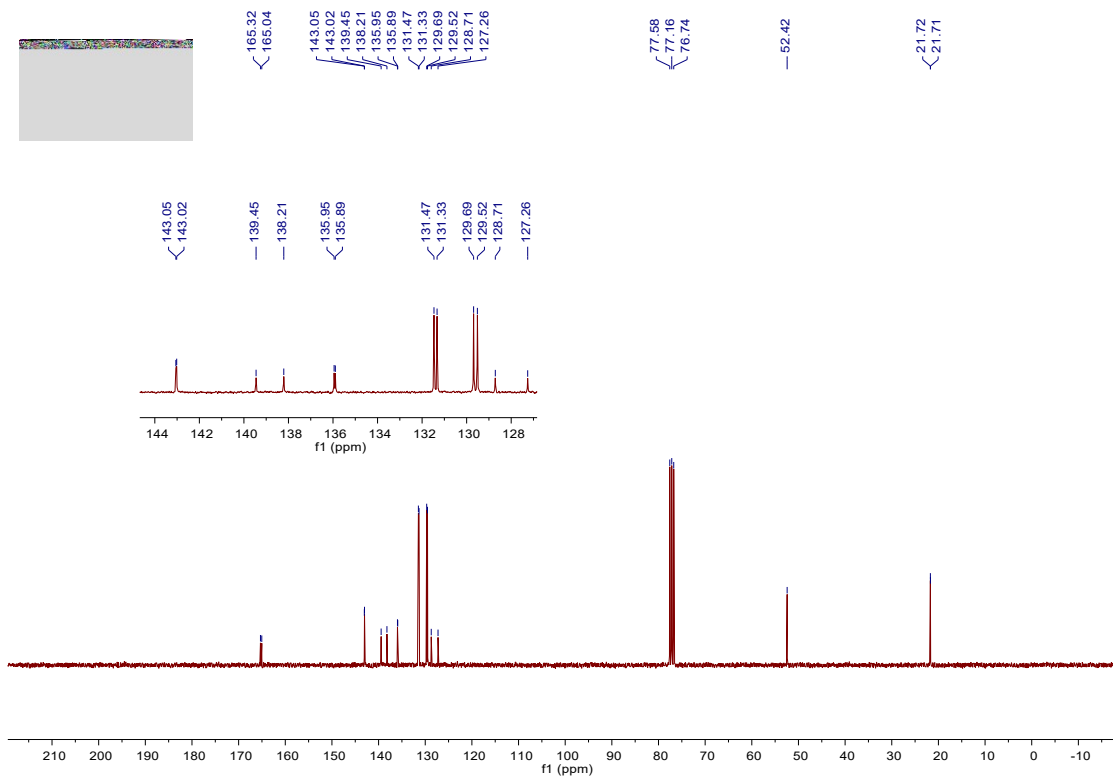

<sup>13</sup>C NMR of compound 3ao

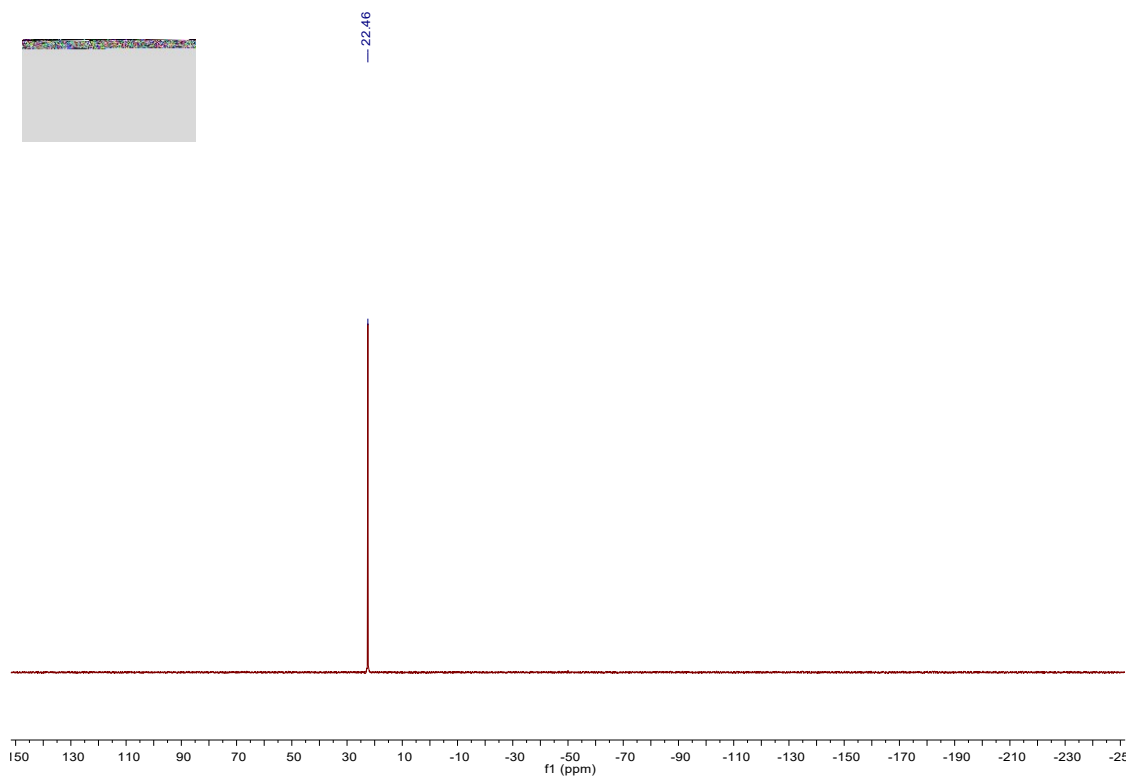

<sup>31</sup>P NMR of compound 3ao

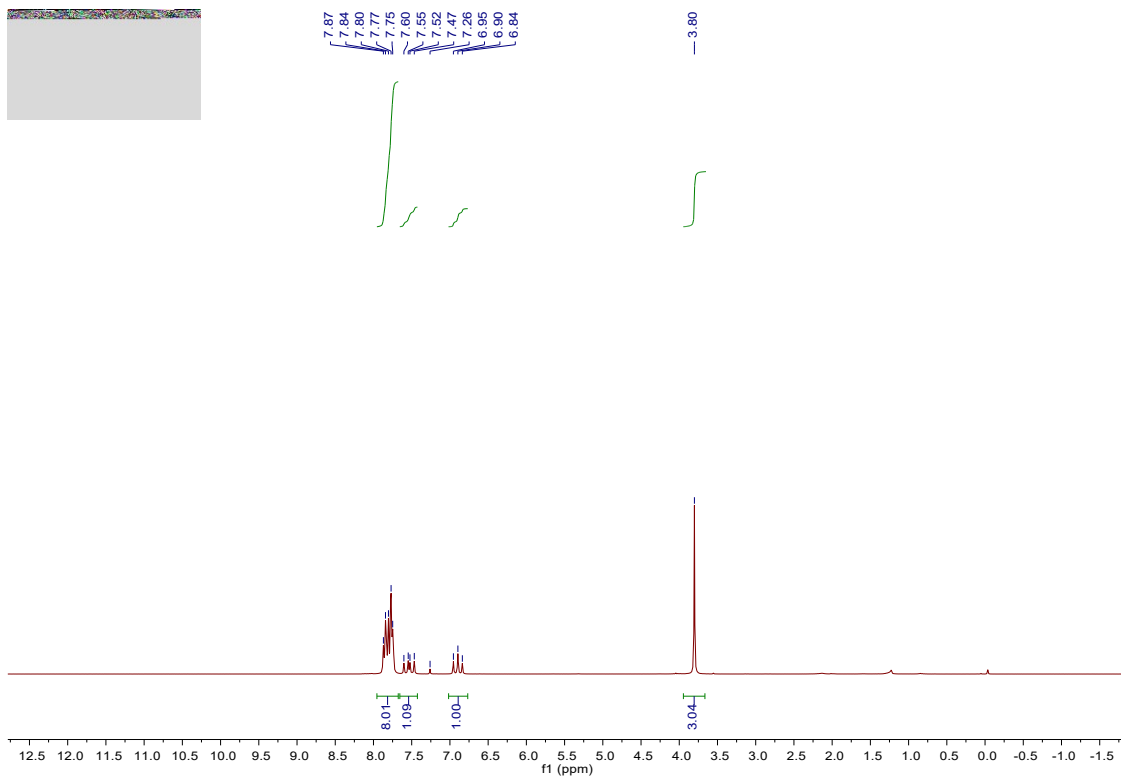

<sup>1</sup>H NMR of compound 3ap

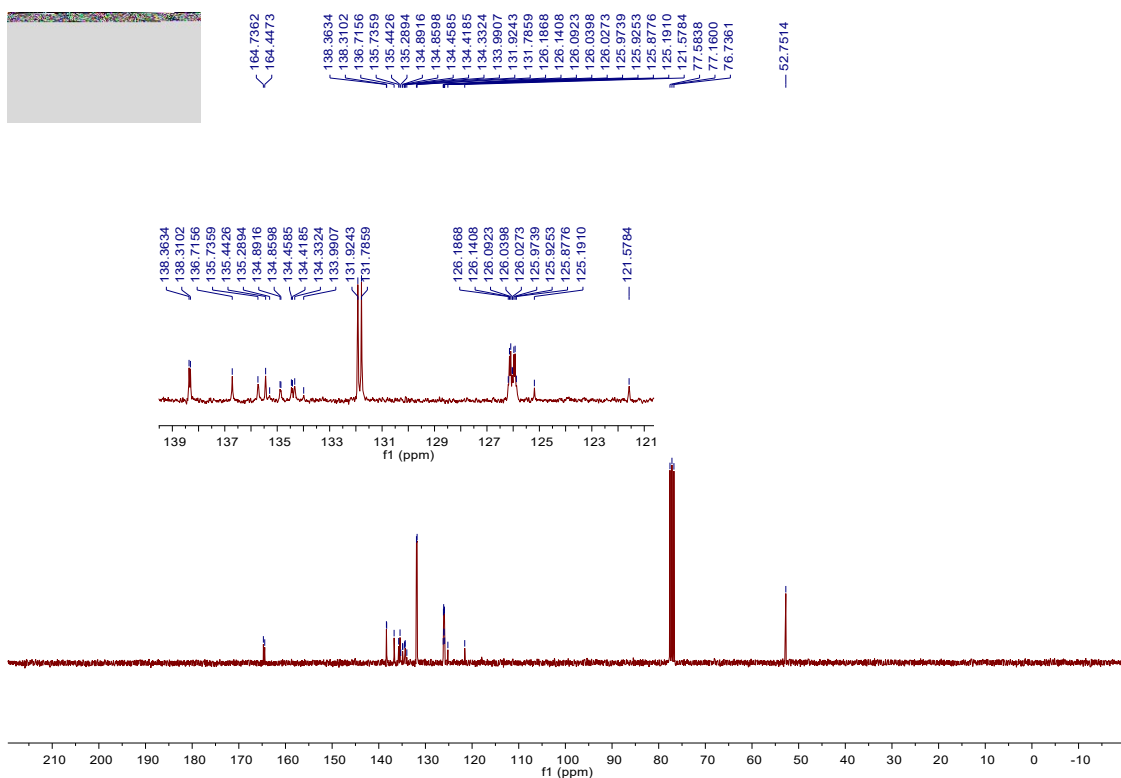

<sup>13</sup>C NMR of compound 3ap

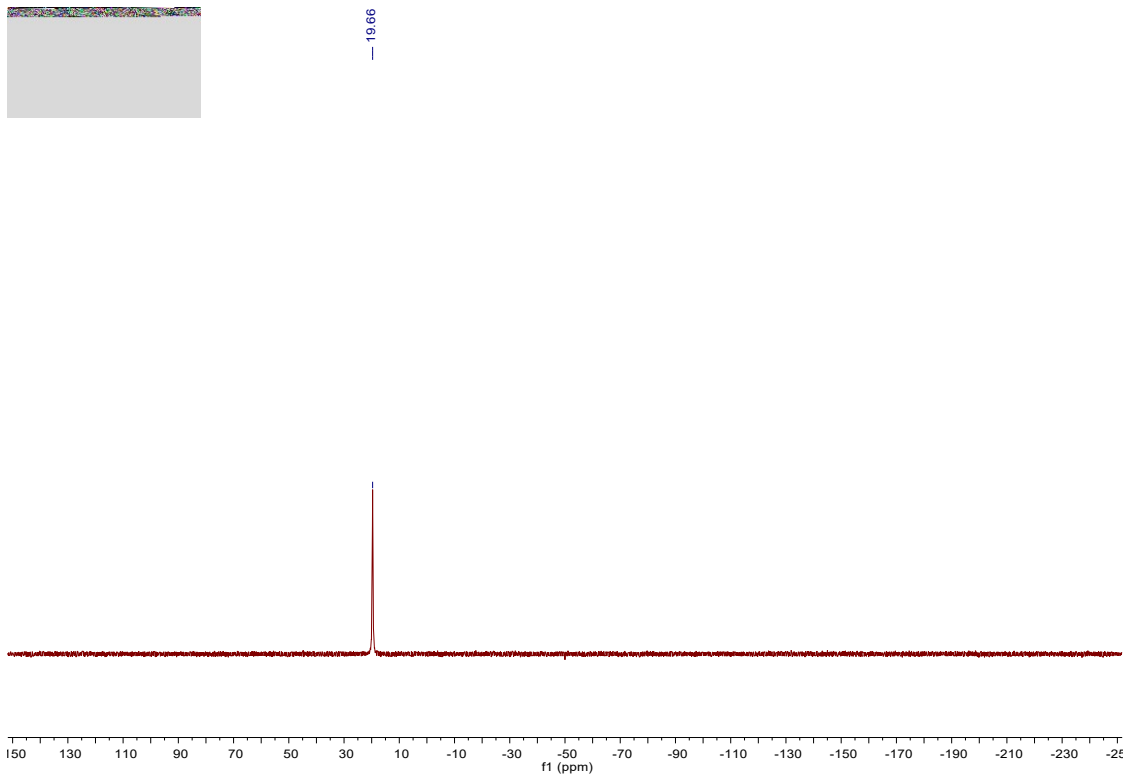

31P NMR of compound 3ap

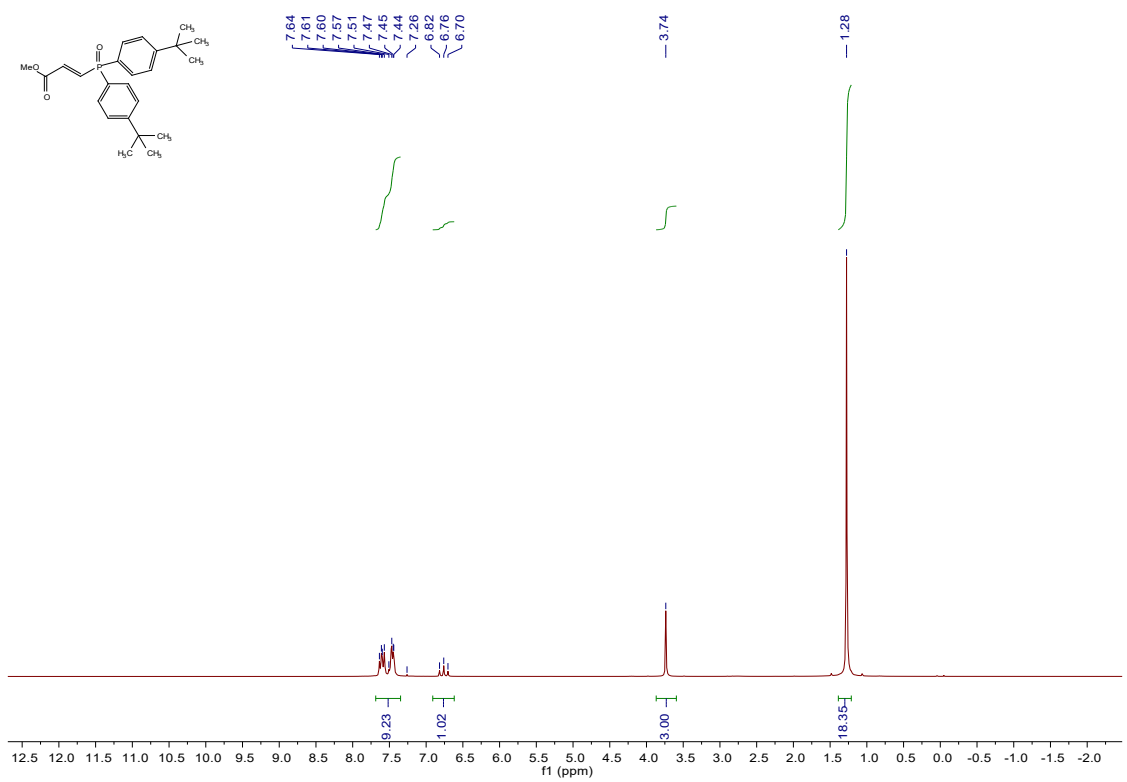

1H NMR of compound 3ap

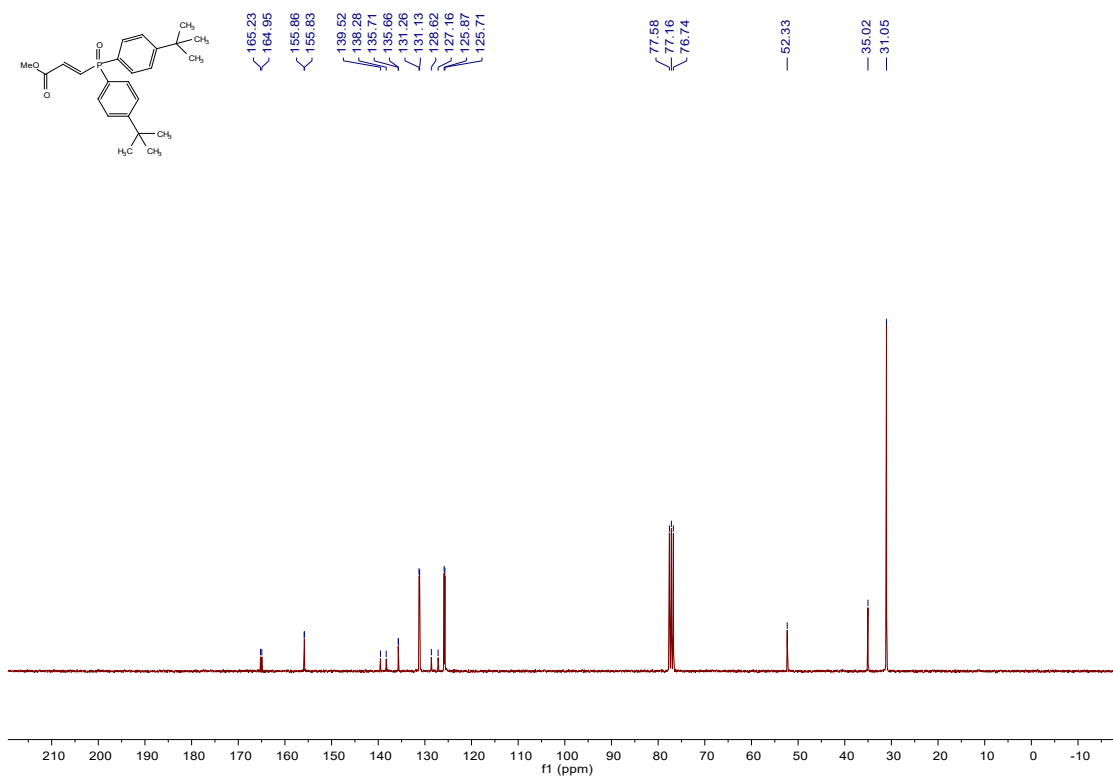

$^{13}\text{C}$  NMR of compound **3aq**

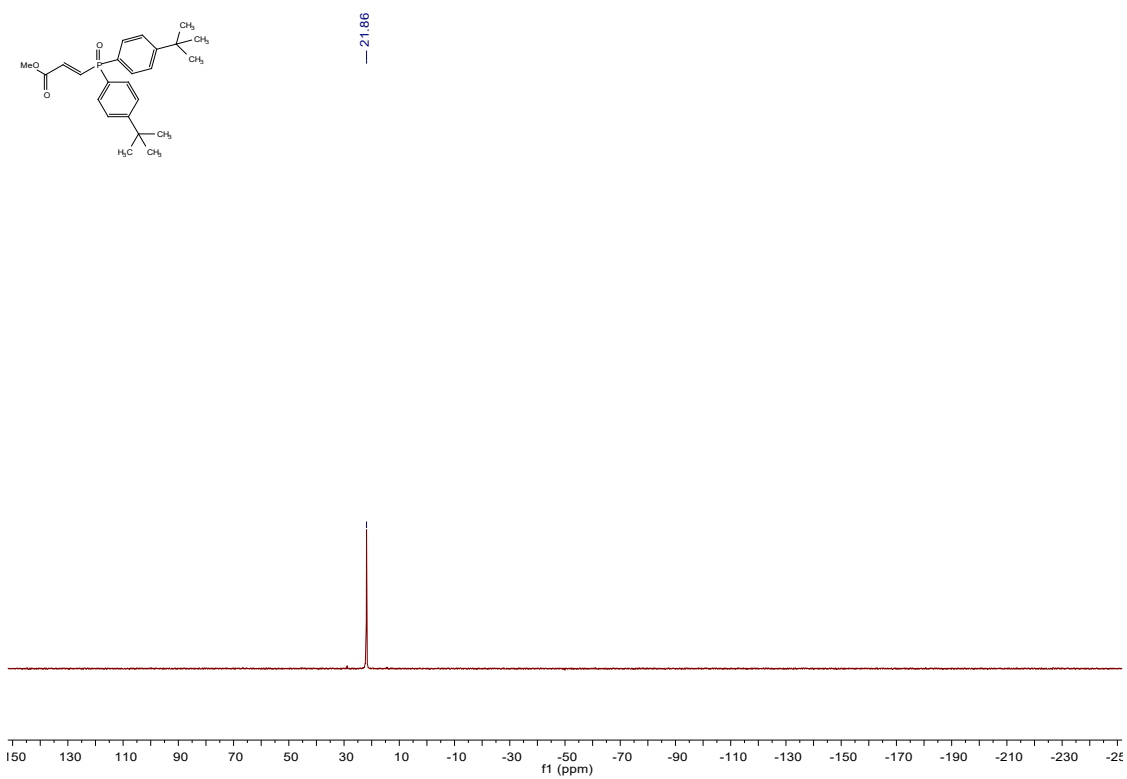

$^{31}\text{P}$  NMR of compound **3aq**

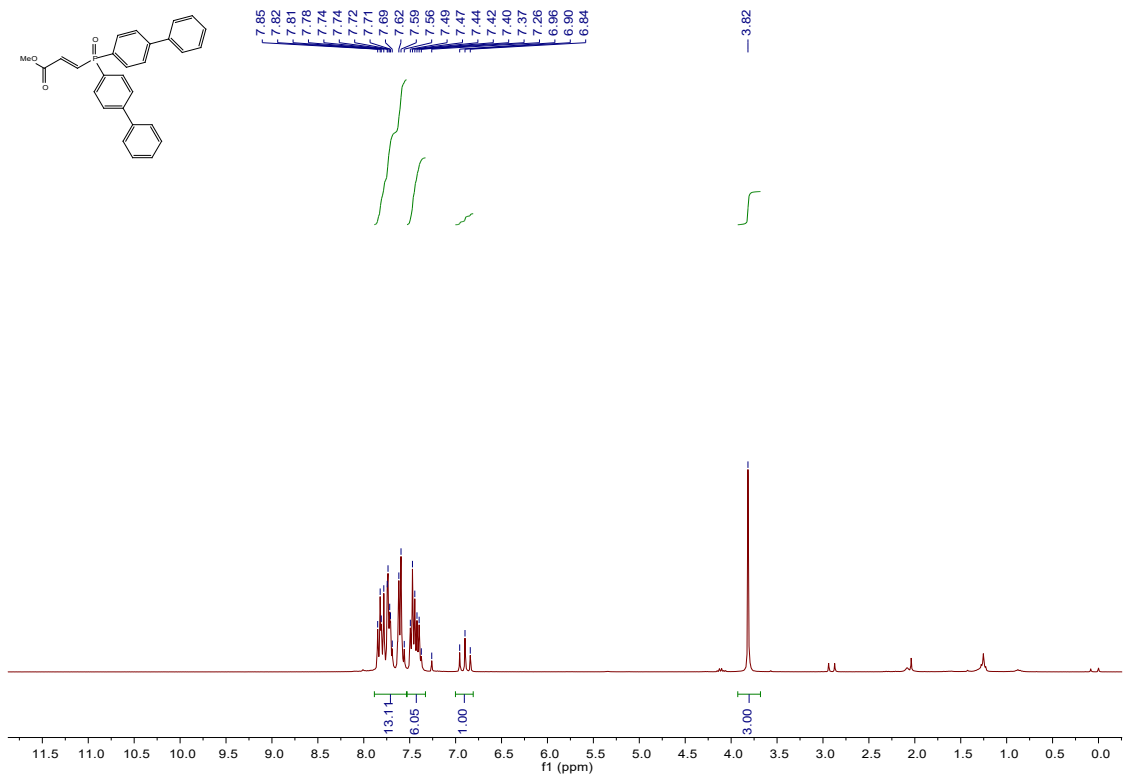

**<sup>1</sup>H NMR of compound 3ar**

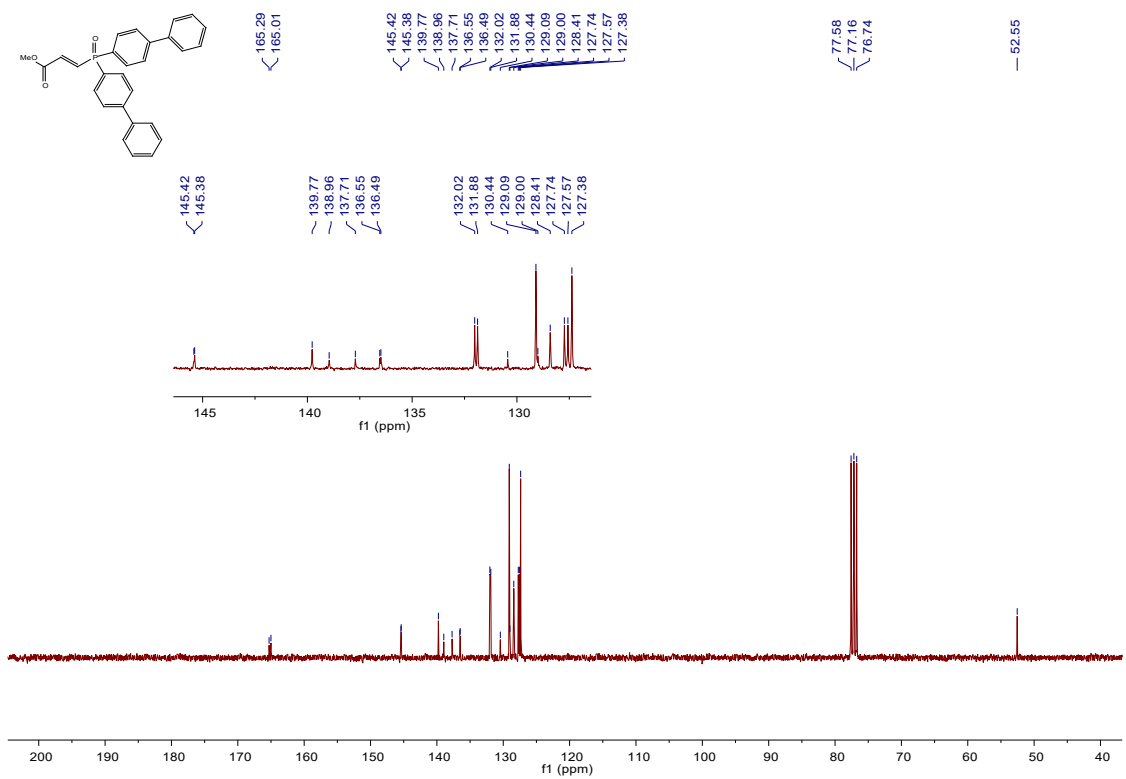

**<sup>13</sup>C NMR of compound 3ar**

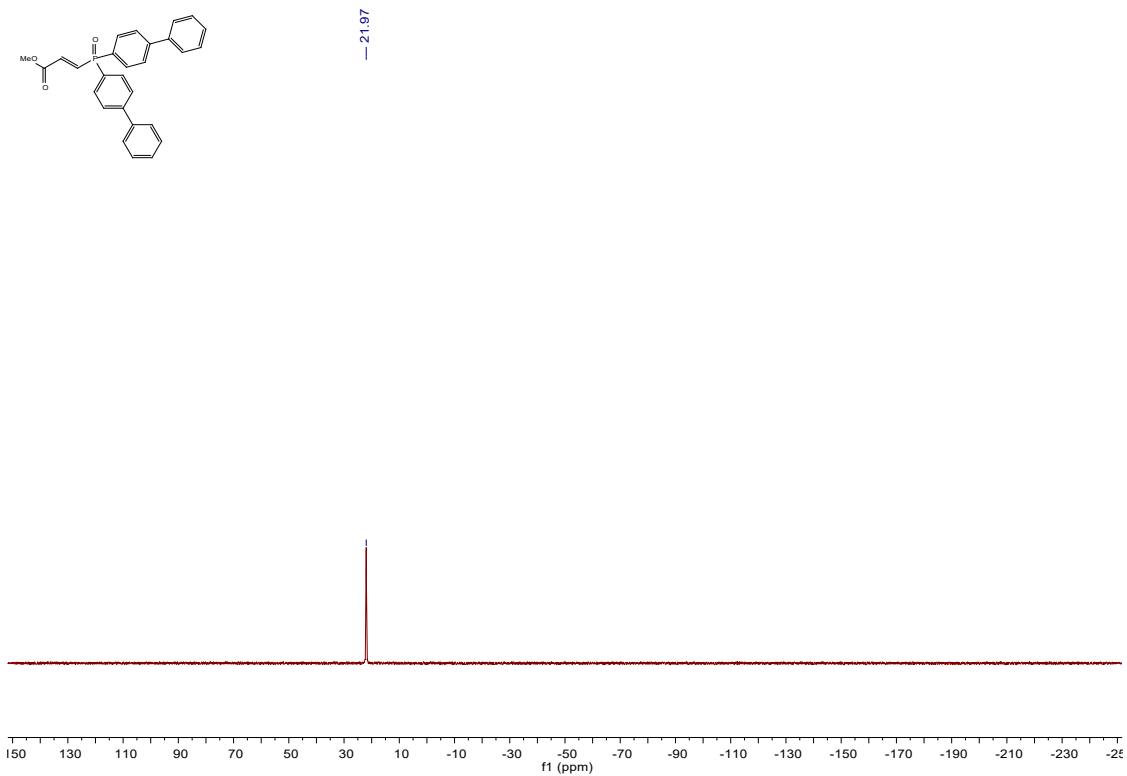

$^{31}\text{P}$  NMR of compound **3ar**

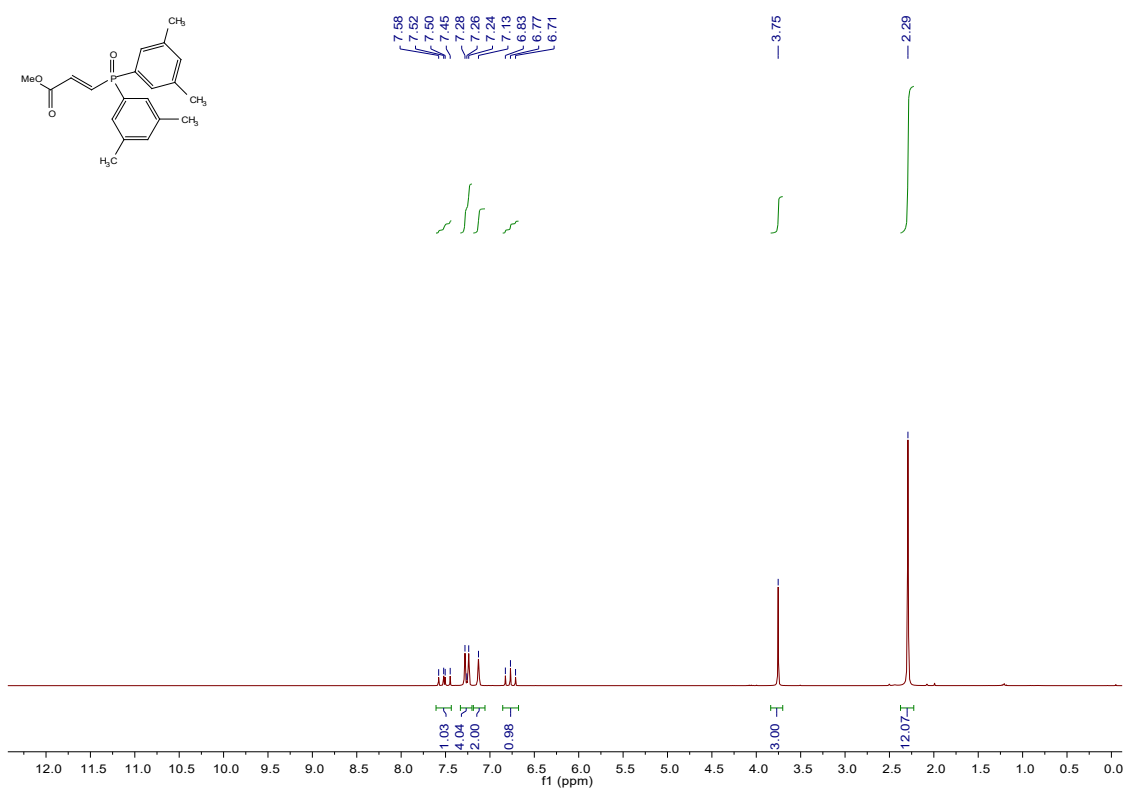

$^1\text{H}$  NMR of compound **3as**



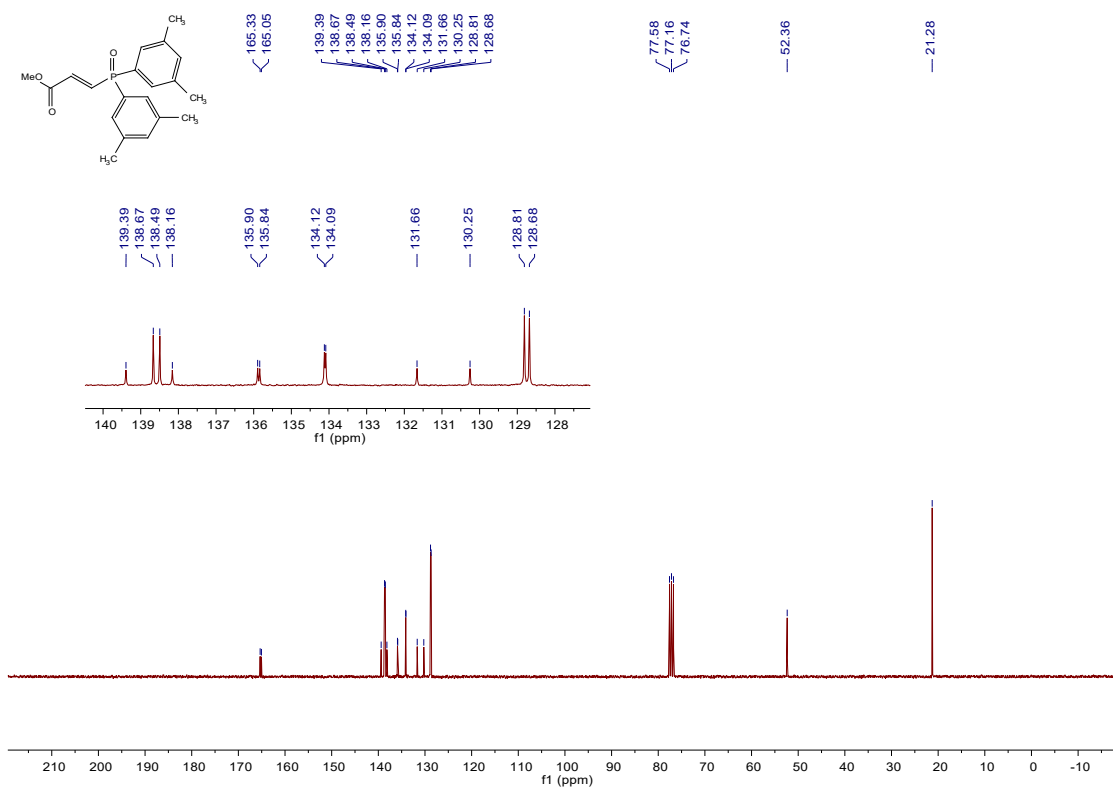

**<sup>13</sup>C NMR of compound 3as**

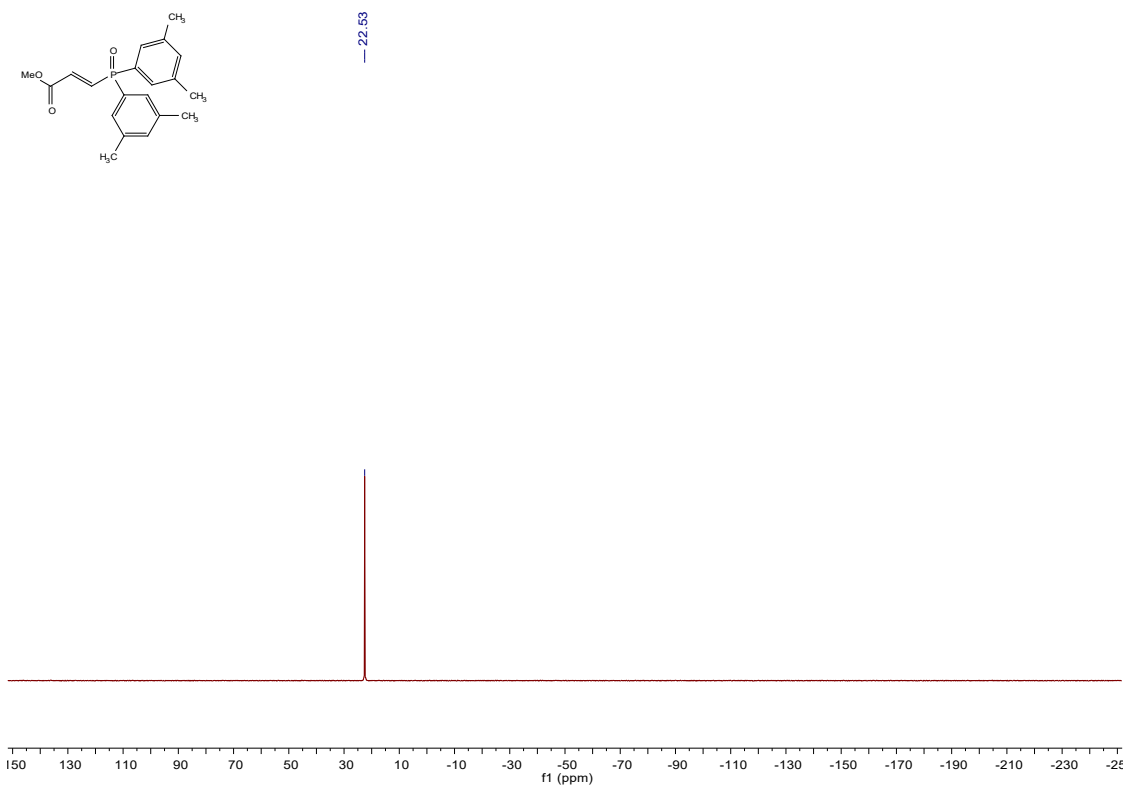

**<sup>31</sup>P NMR of compound 3as**

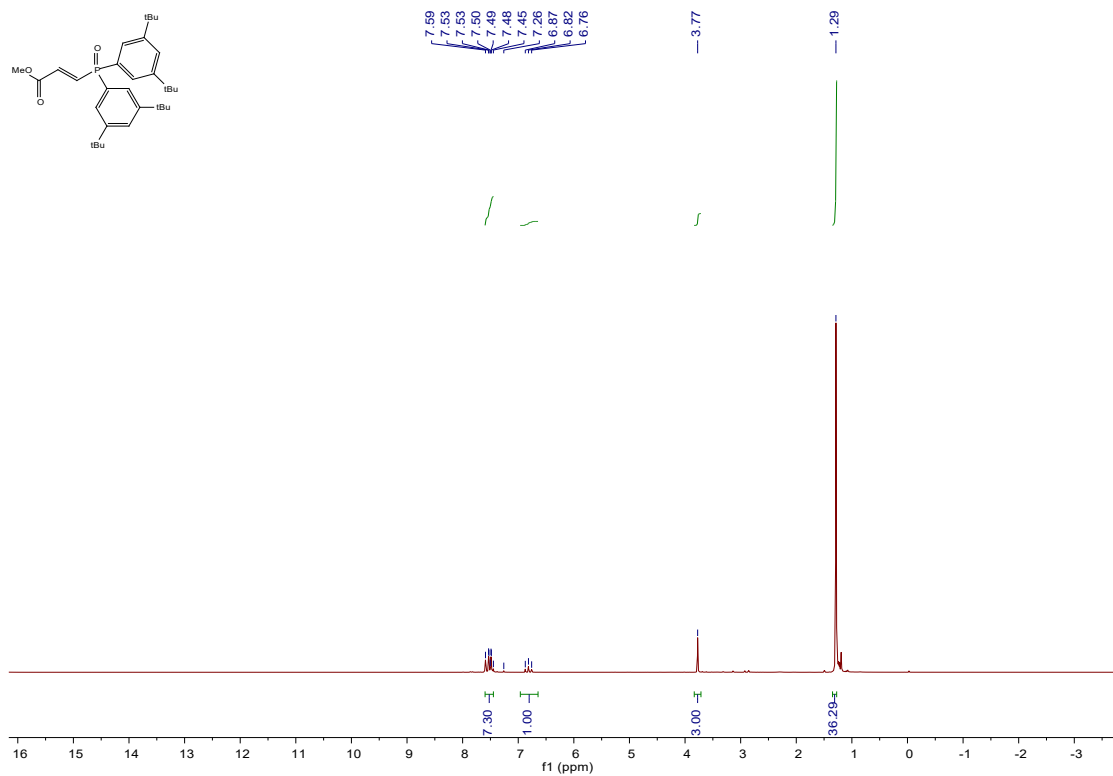

<sup>1</sup>H NMR of compound 3at

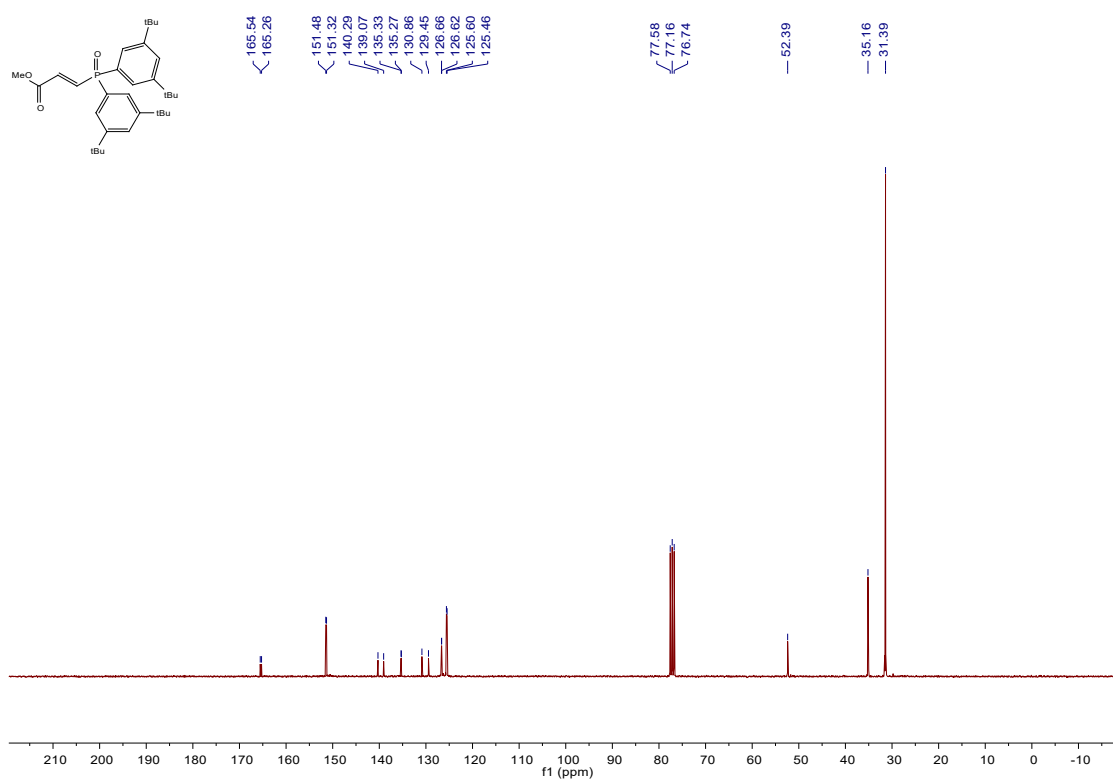

<sup>13</sup>C NMR of compound 3at

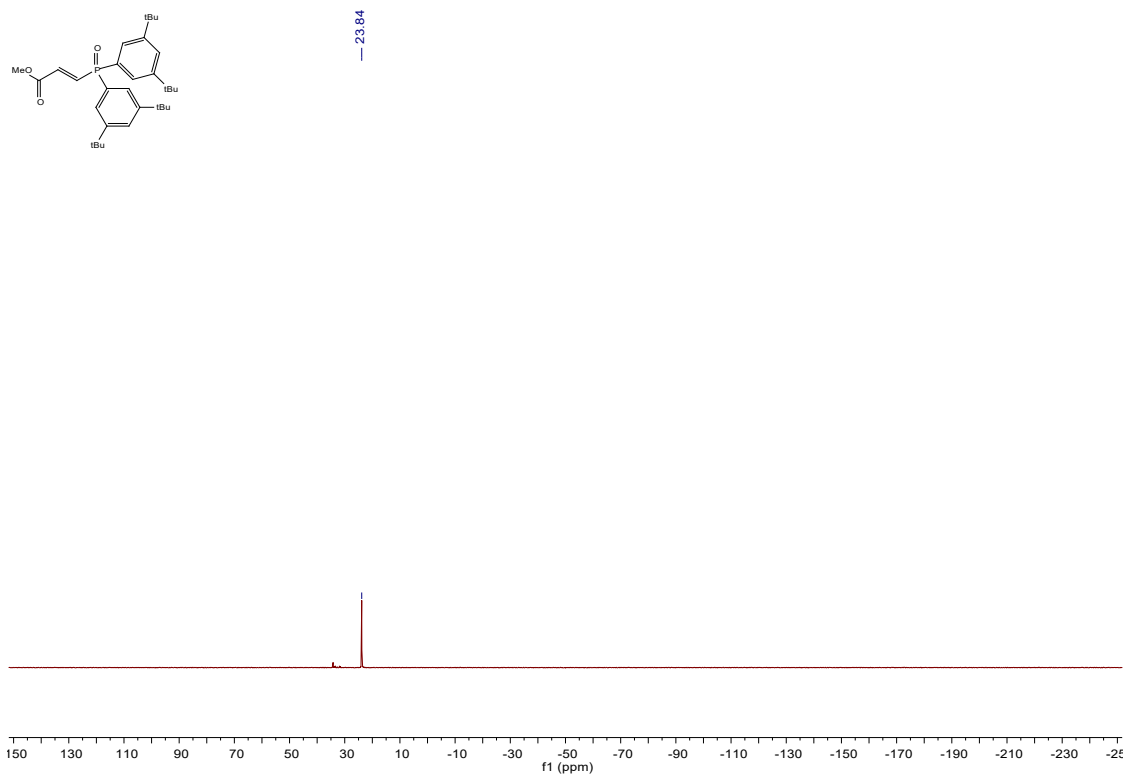

$^{31}\text{P}$  NMR of compound **3at**

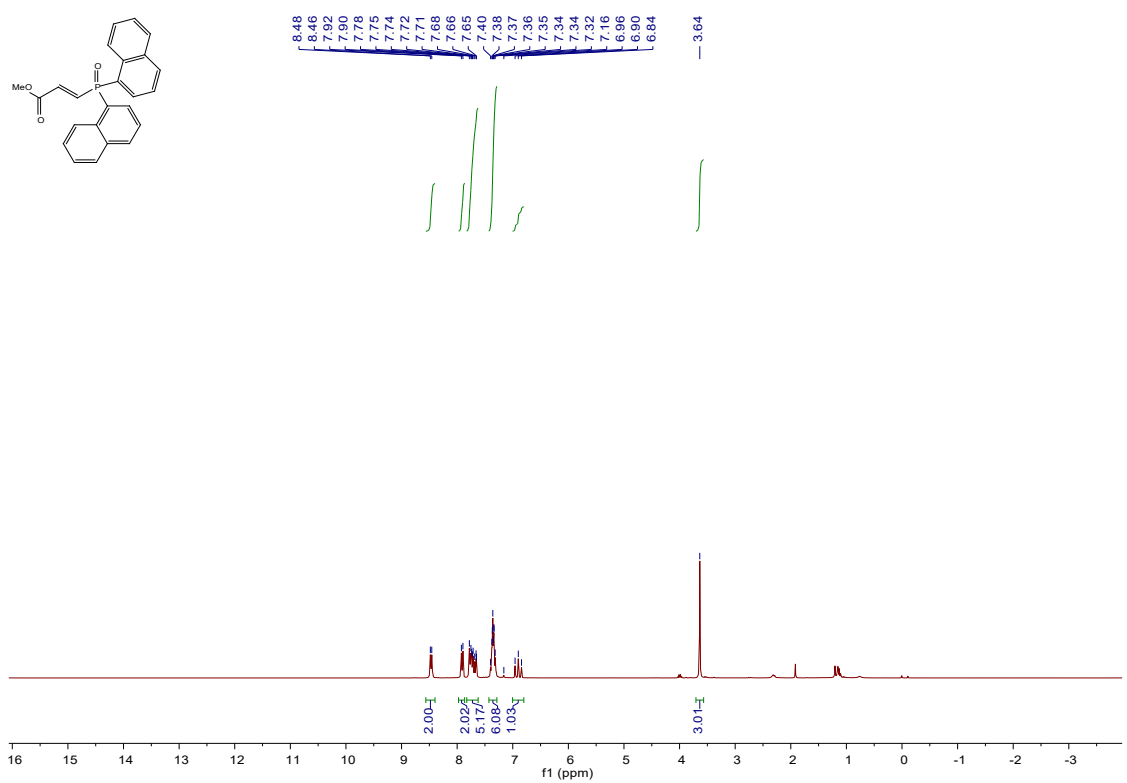

$^1\text{H}$  NMR of compound **3au**

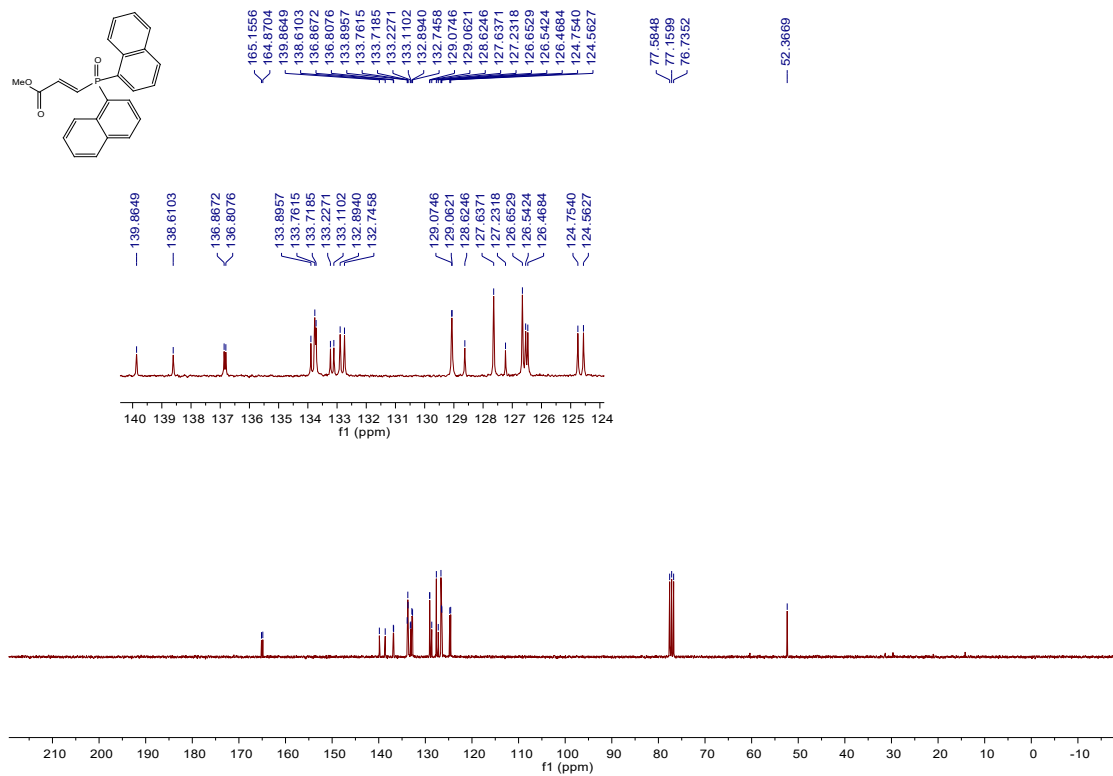

<sup>13</sup>CNMR of compound 3au

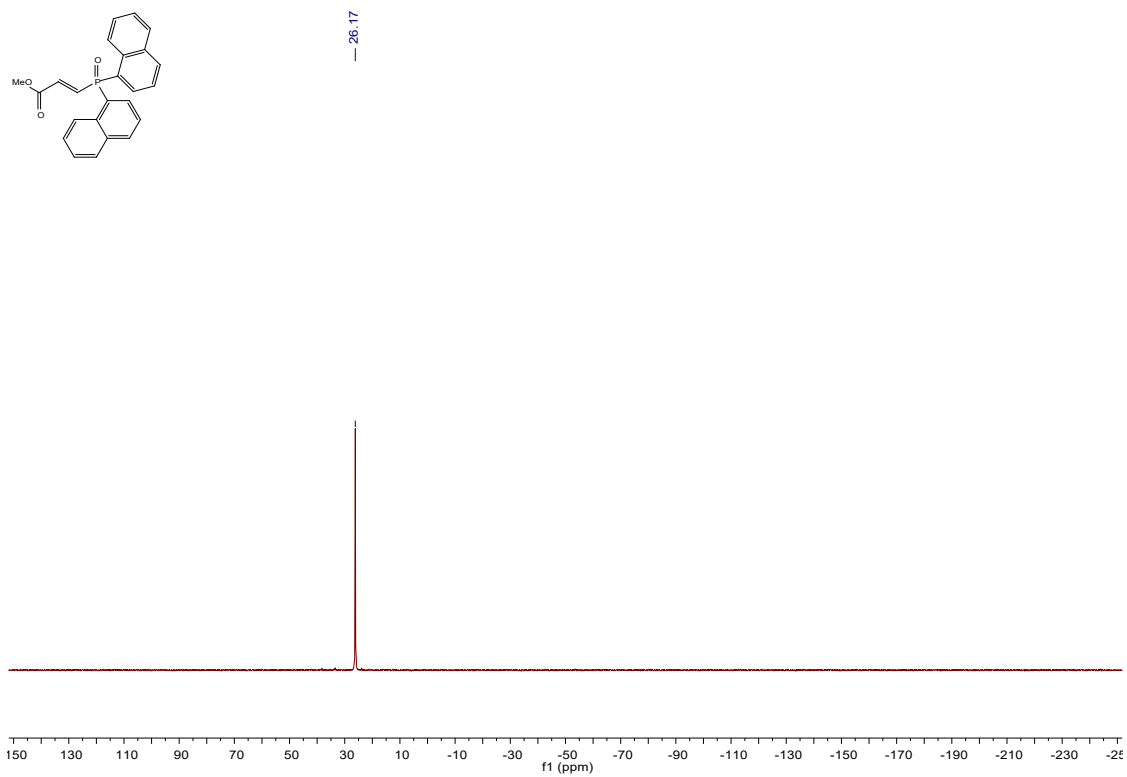

<sup>31</sup>P NMR of compound 3au

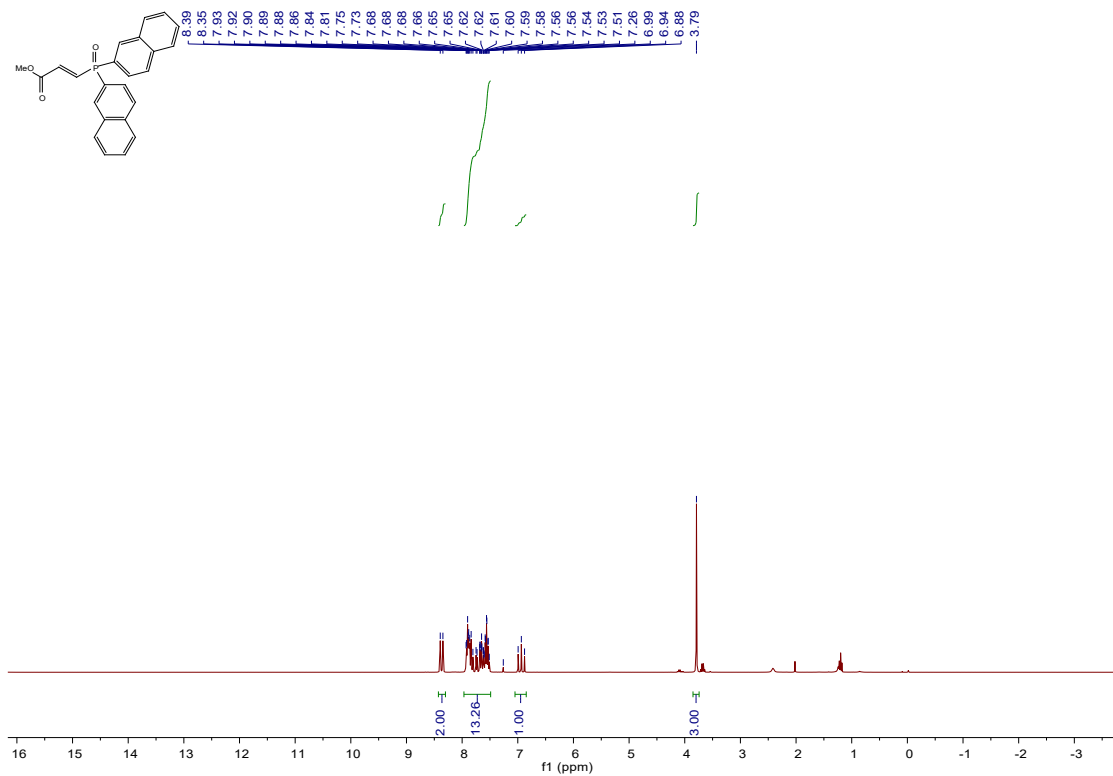

**<sup>1</sup>H NMR of compound 3av**

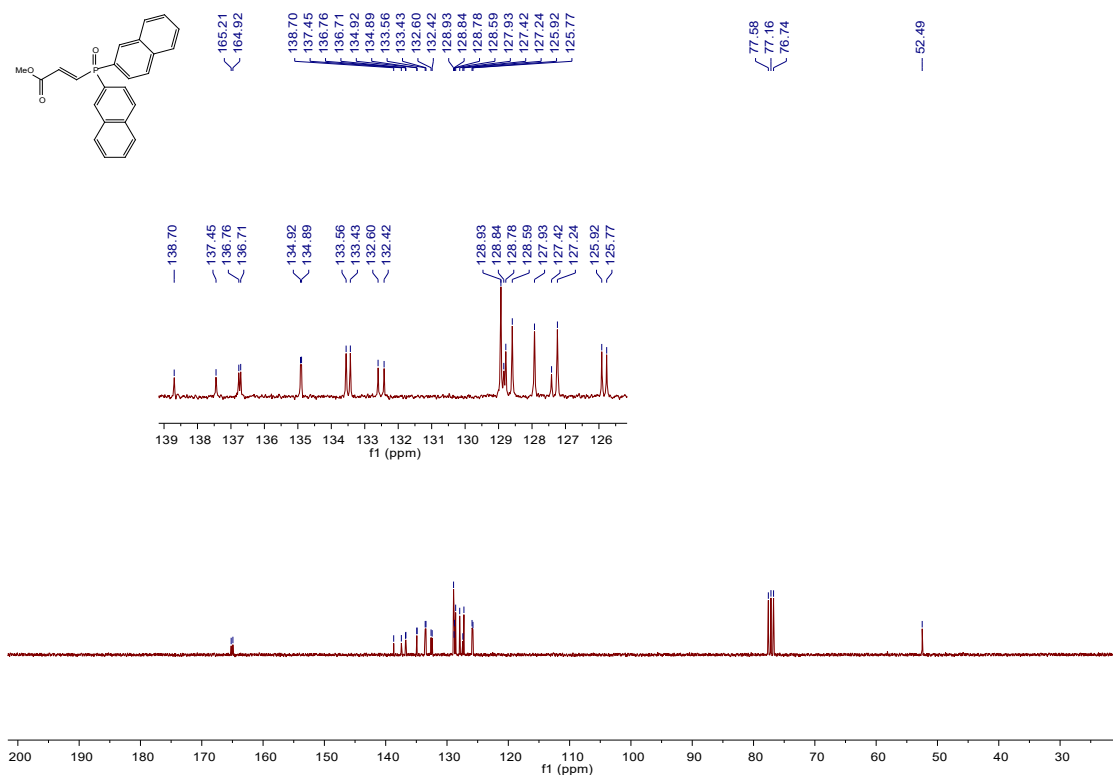

**<sup>13</sup>C NMR of compound 3av**

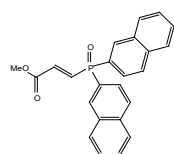

— 22.61

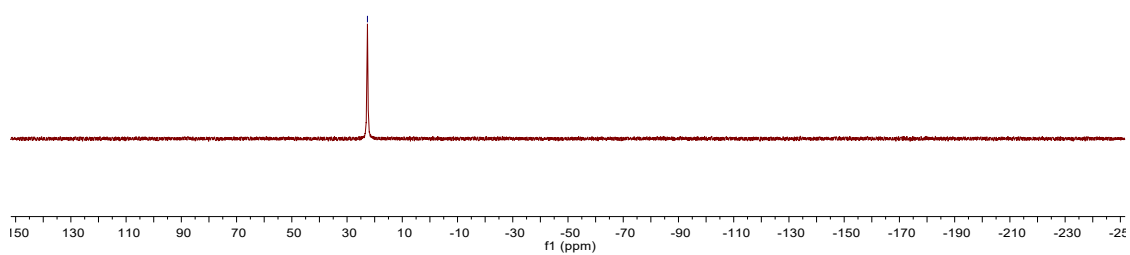

<sup>31</sup>P NMR of compound **3av**

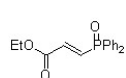

7.70  
7.68  
7.67  
7.66  
7.64  
7.63  
7.57  
7.55  
7.55  
7.53  
7.52  
7.51  
7.50  
7.49  
7.48  
7.47  
7.45  
7.45  
7.44  
7.44  
7.43  
7.26  
6.82  
6.76  
6.70  
4.24  
4.22  
4.19  
4.17  
1.28  
1.26  
1.23

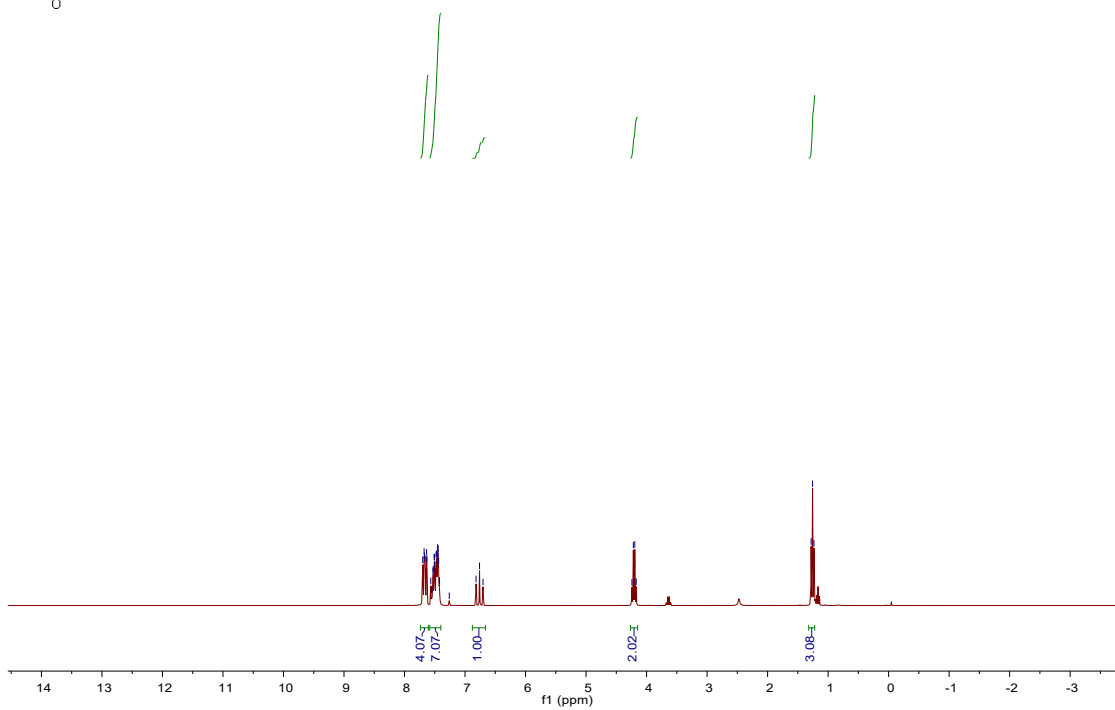

<sup>1</sup>H NMR of compound **3bk**

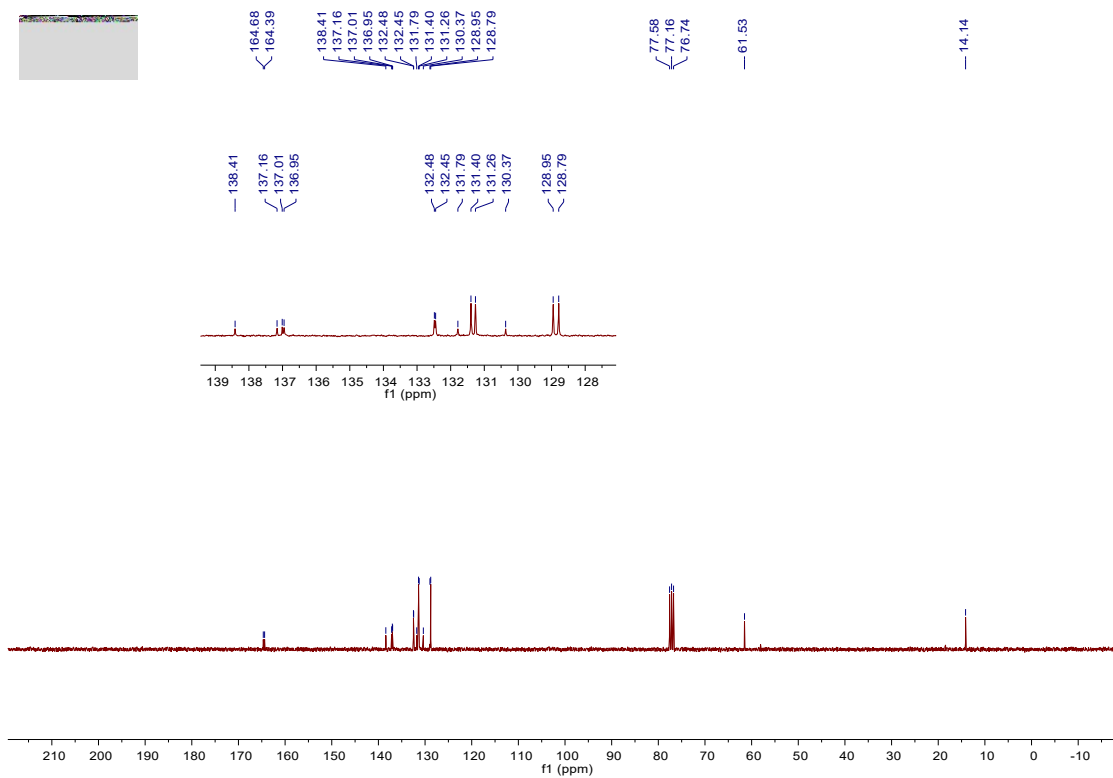

<sup>13</sup>C NMR of compound **3bk**

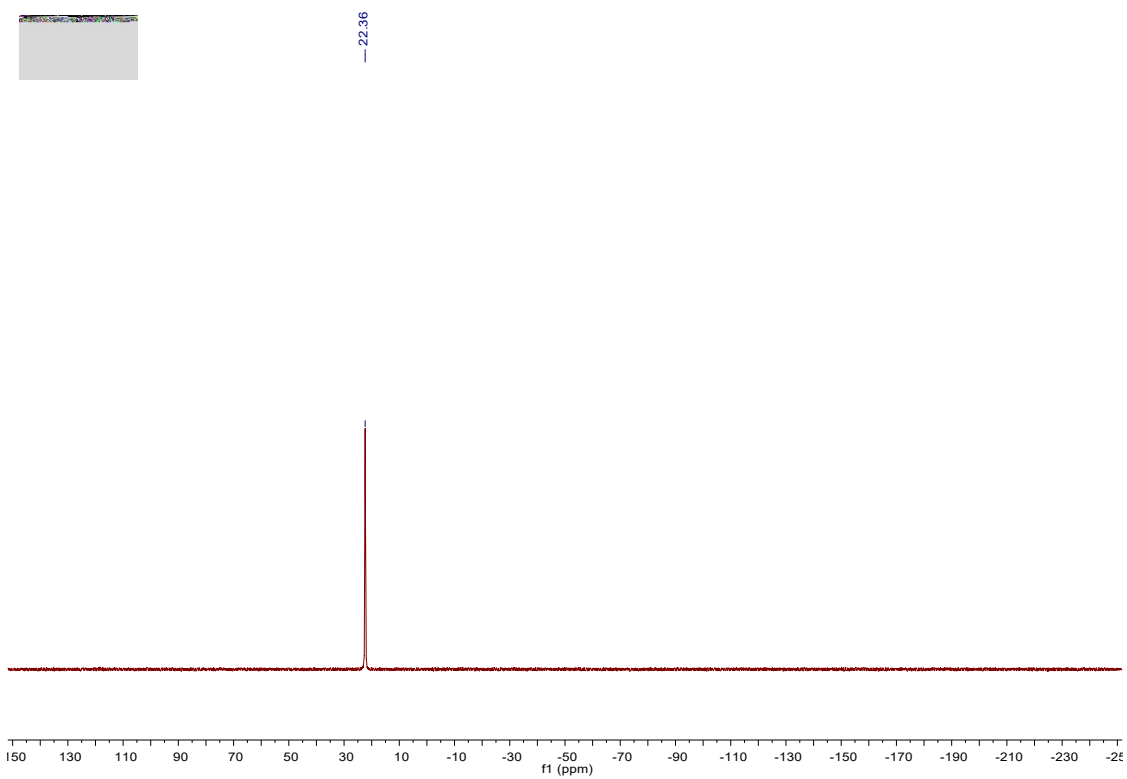

<sup>31</sup>P NMR of compound **3bk**

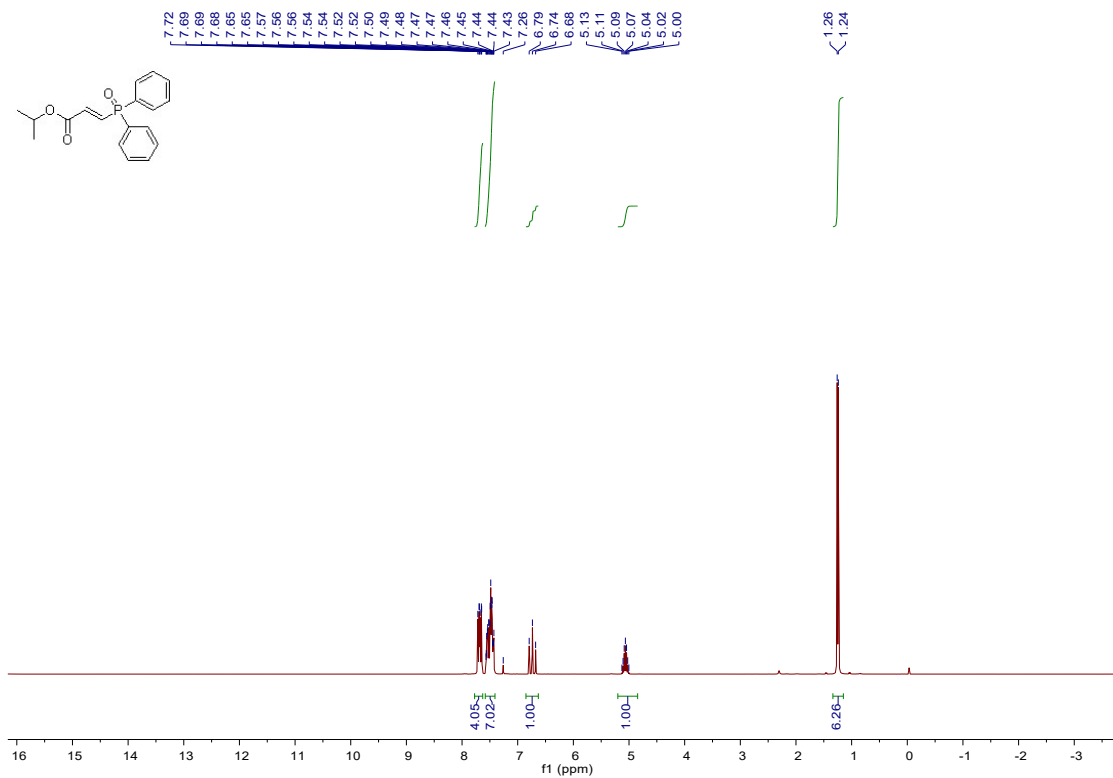

<sup>1</sup>H NMR of compound 3ck

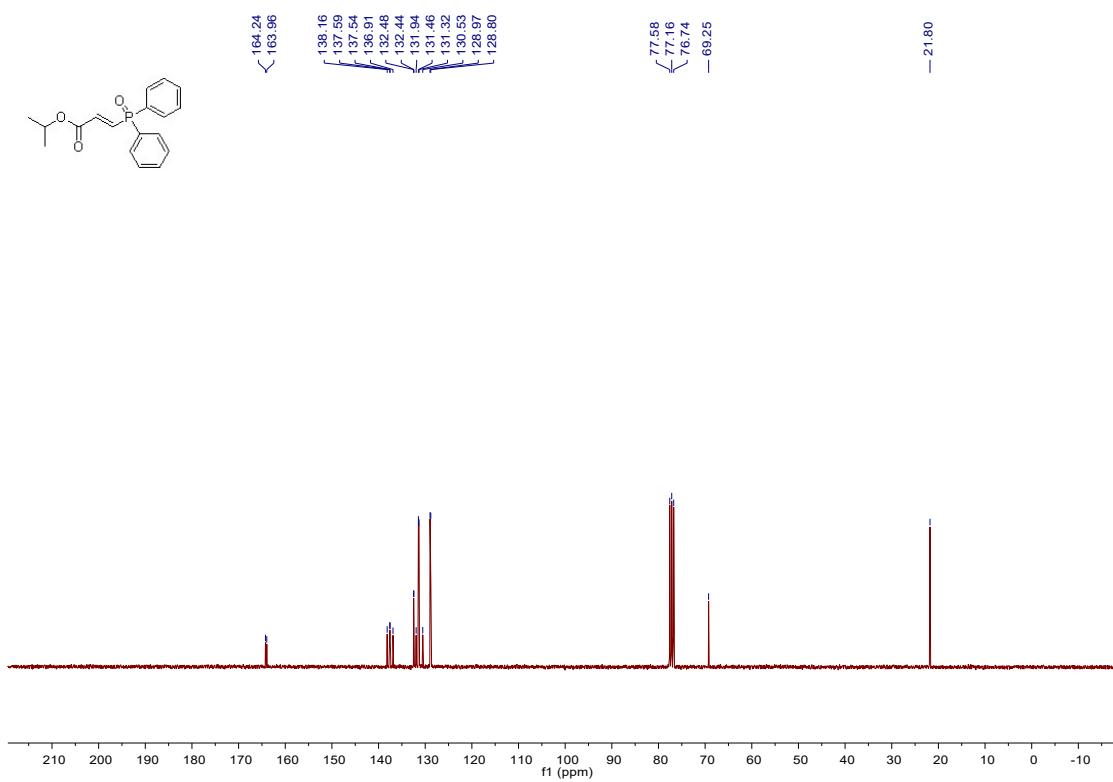

<sup>13</sup>C NMR of compound 3ck



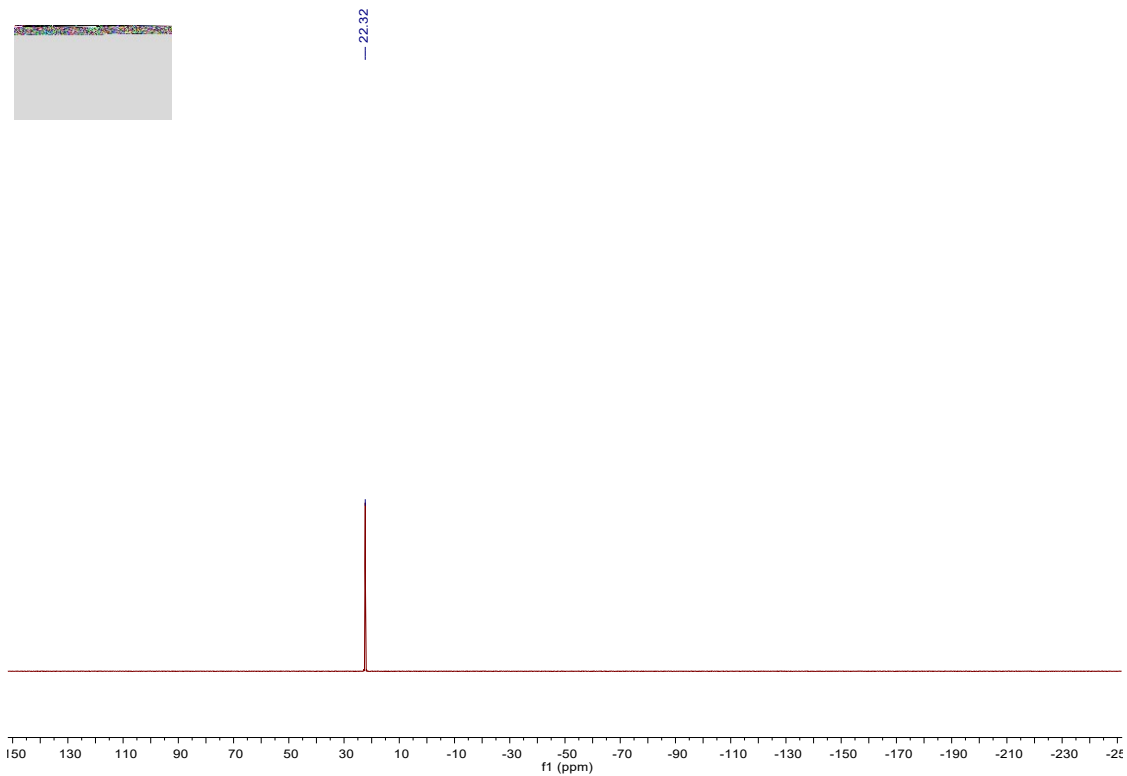

31P NMR of compound 3ck

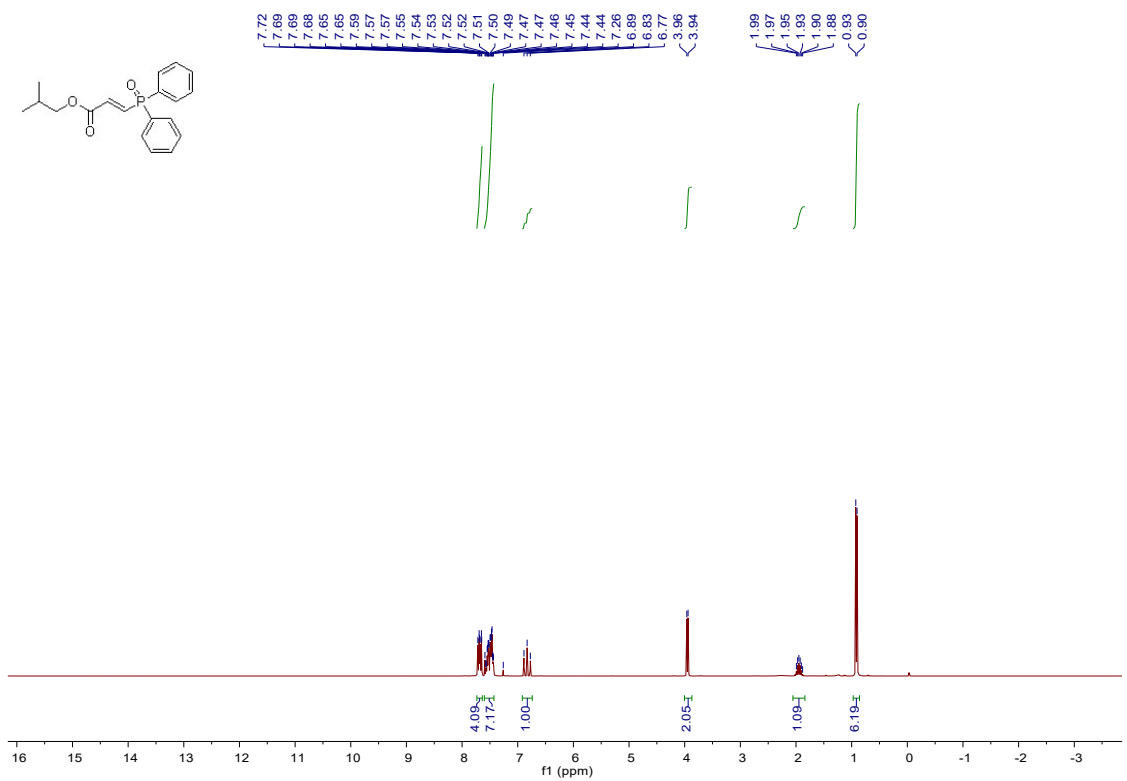

1H NMR of compound 3dk

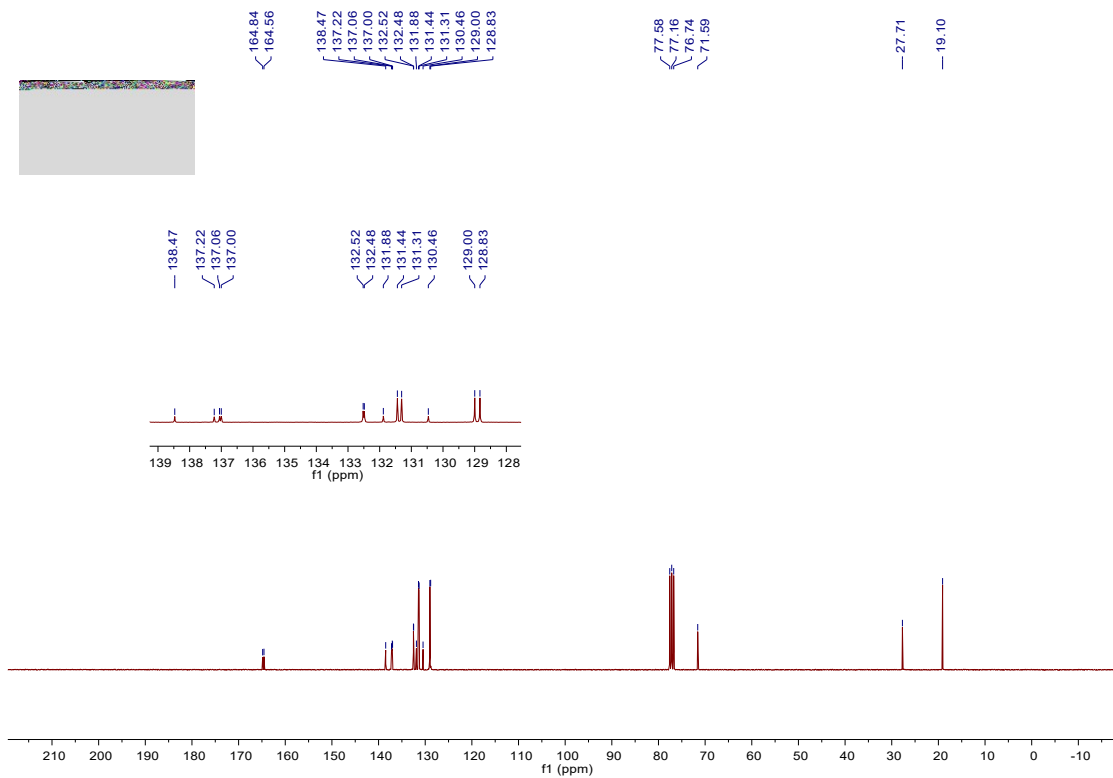

<sup>13</sup>C NMR of compound **3dk**

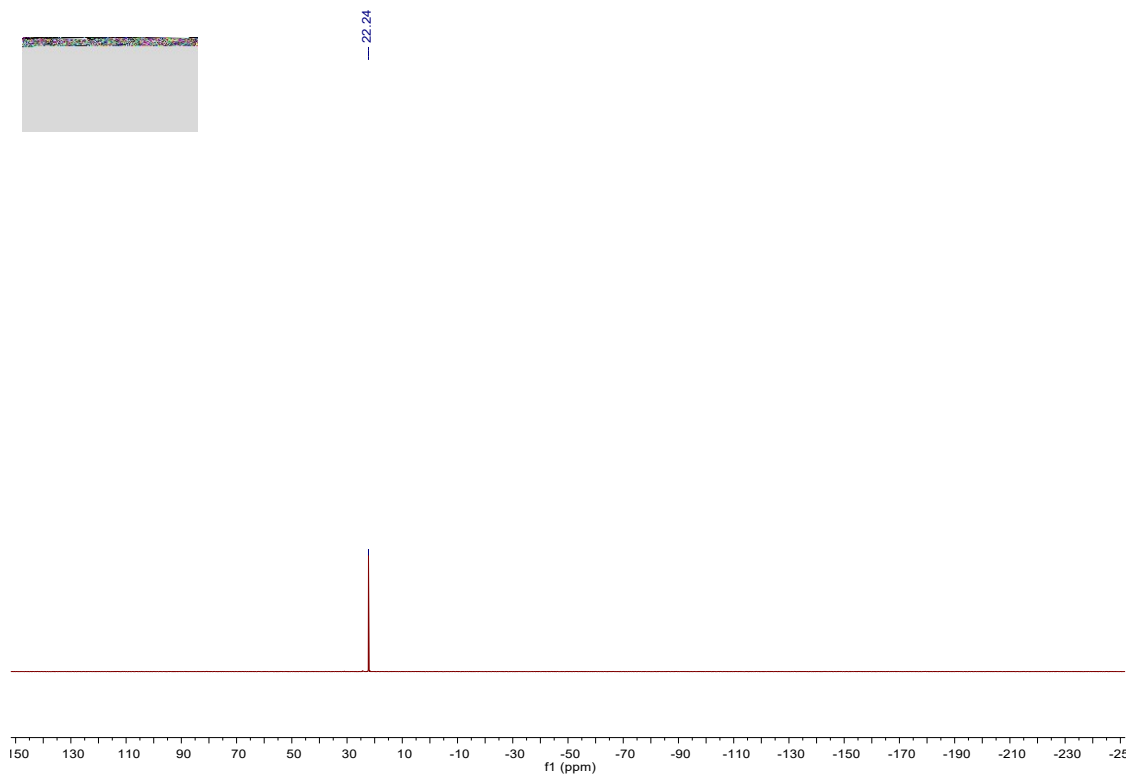

<sup>31</sup>P NMR of compound **3dk**

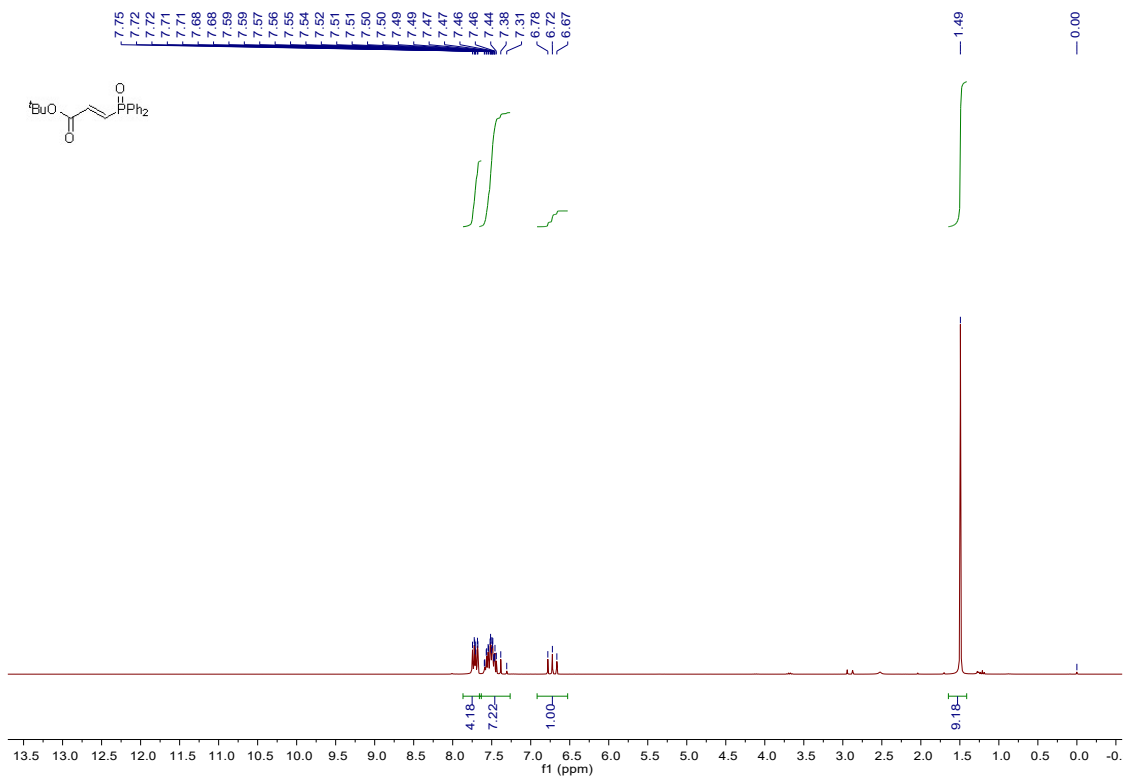

<sup>1</sup>H NMR of compound **3ek**

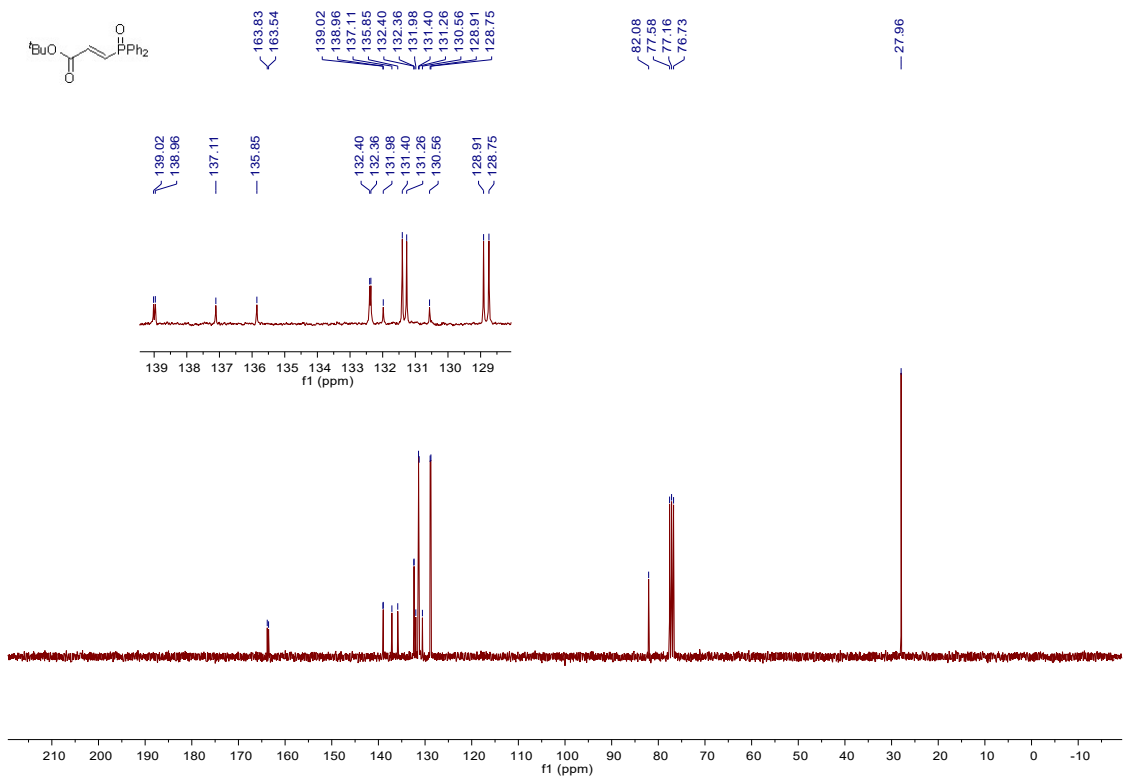

<sup>13</sup>C NMR of compound **3ek**

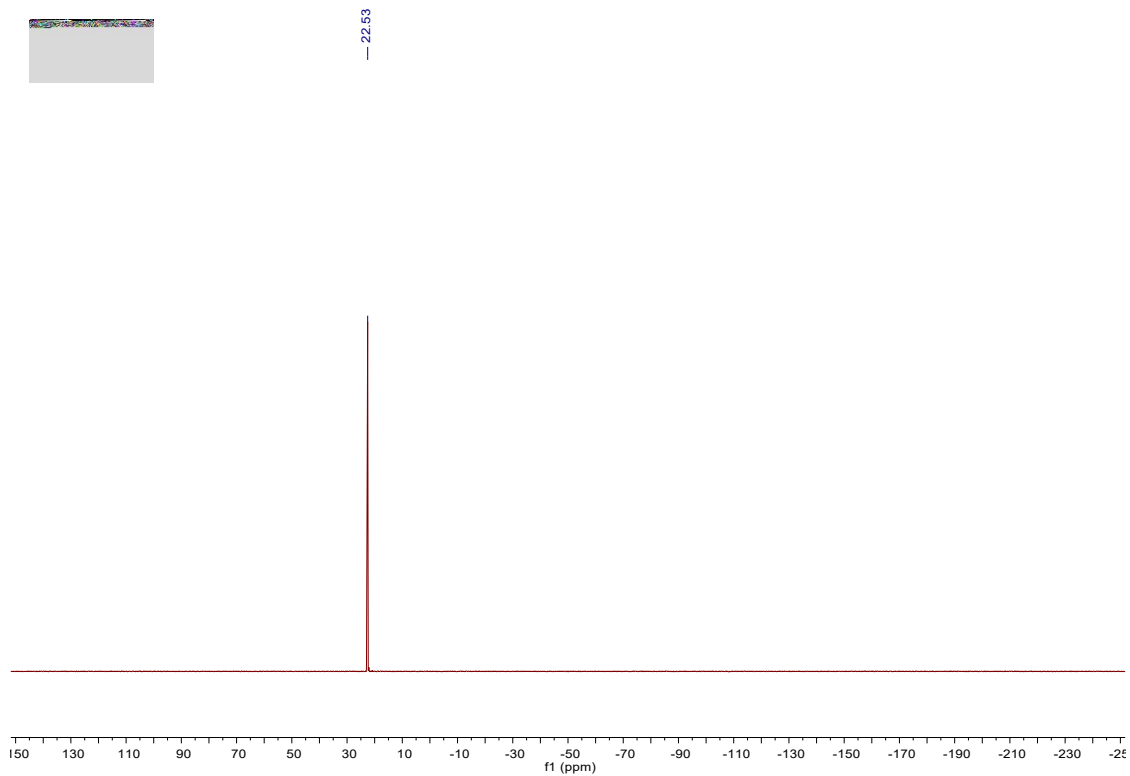

**31P NMR of compound 3ek**

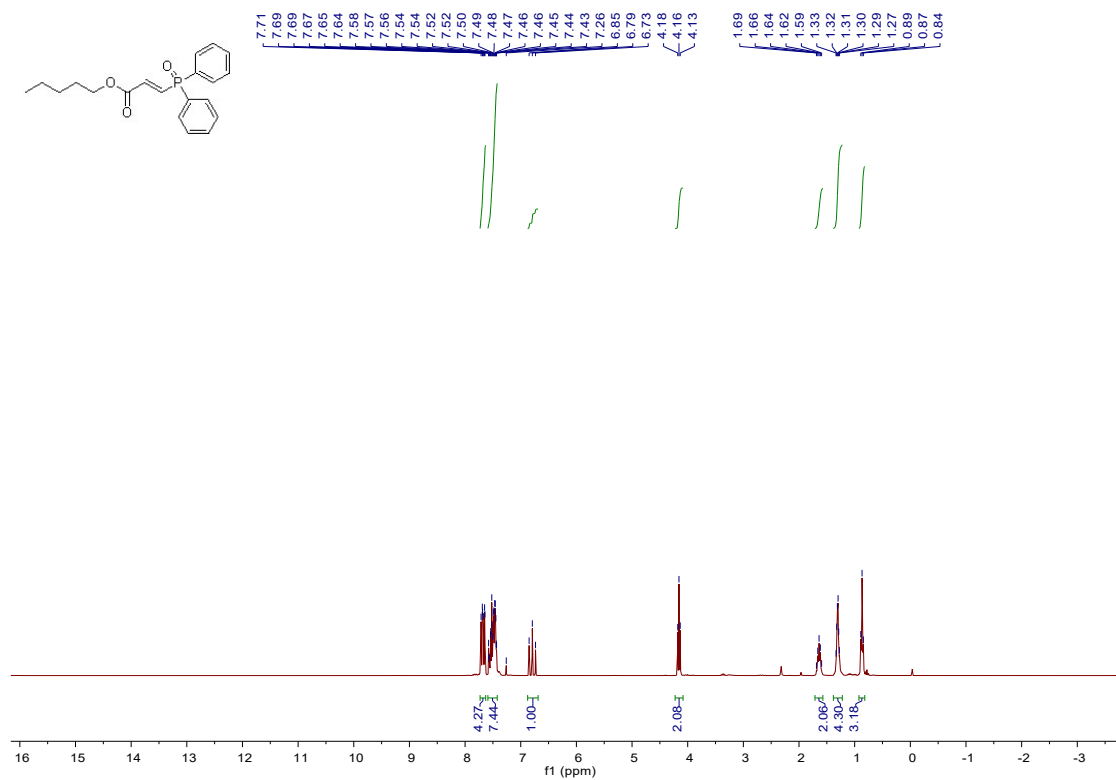

**1H NMR of compound 3fk**

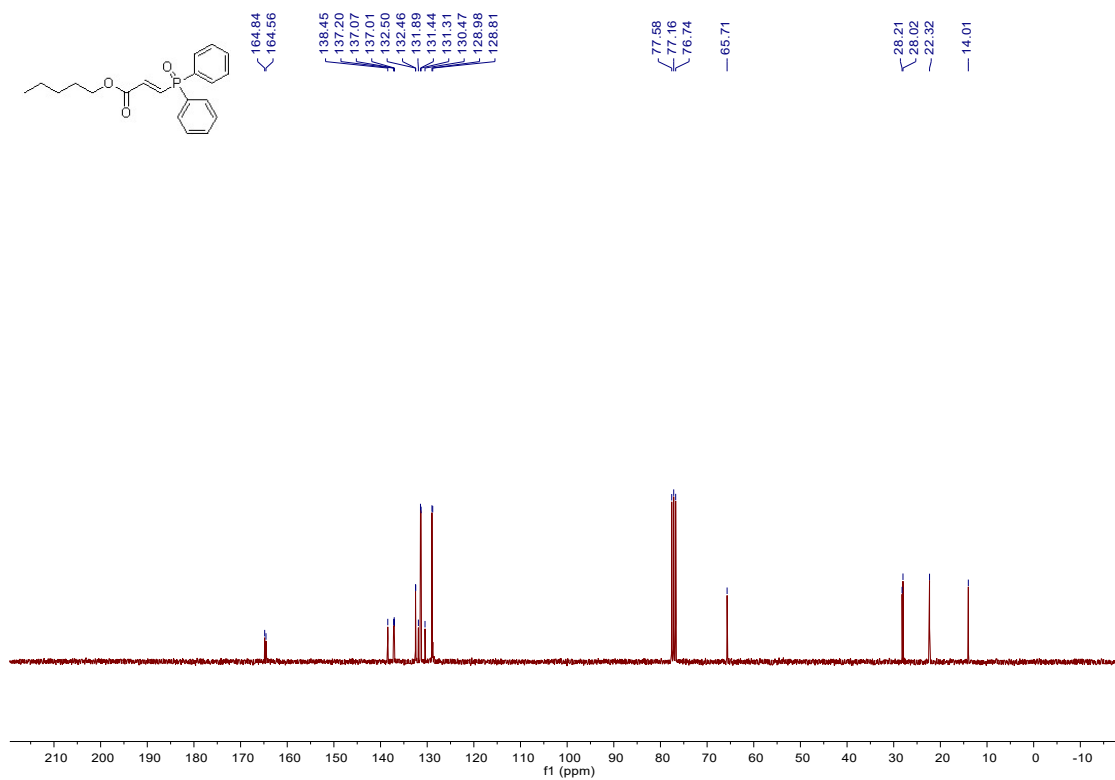

<sup>13</sup>C NMR of compound 3fk

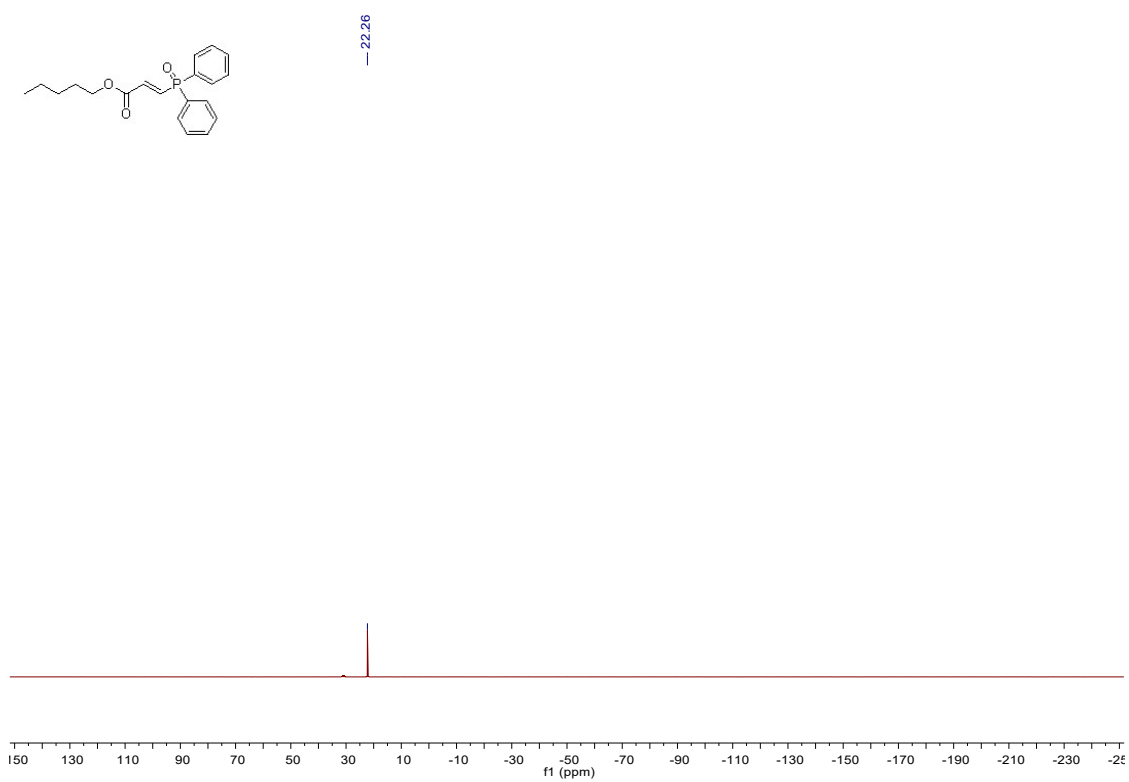

<sup>31</sup>P NMR of compound 3fk

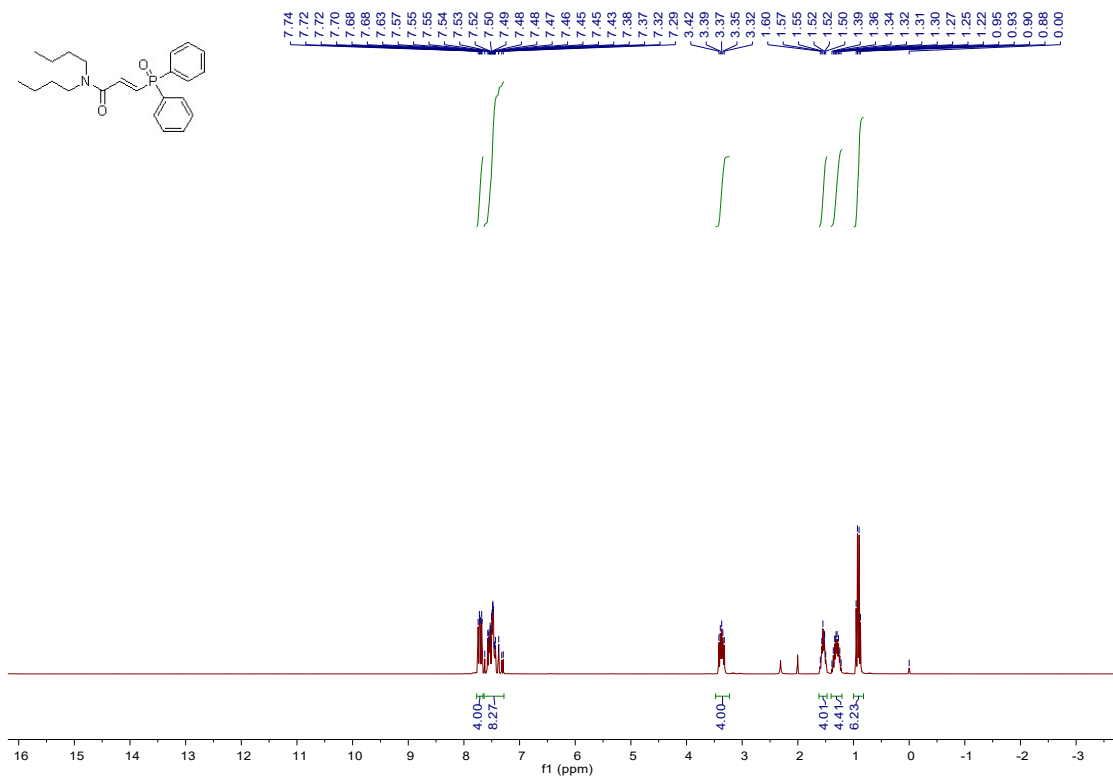

<sup>1</sup>H NMR of compound 3gk

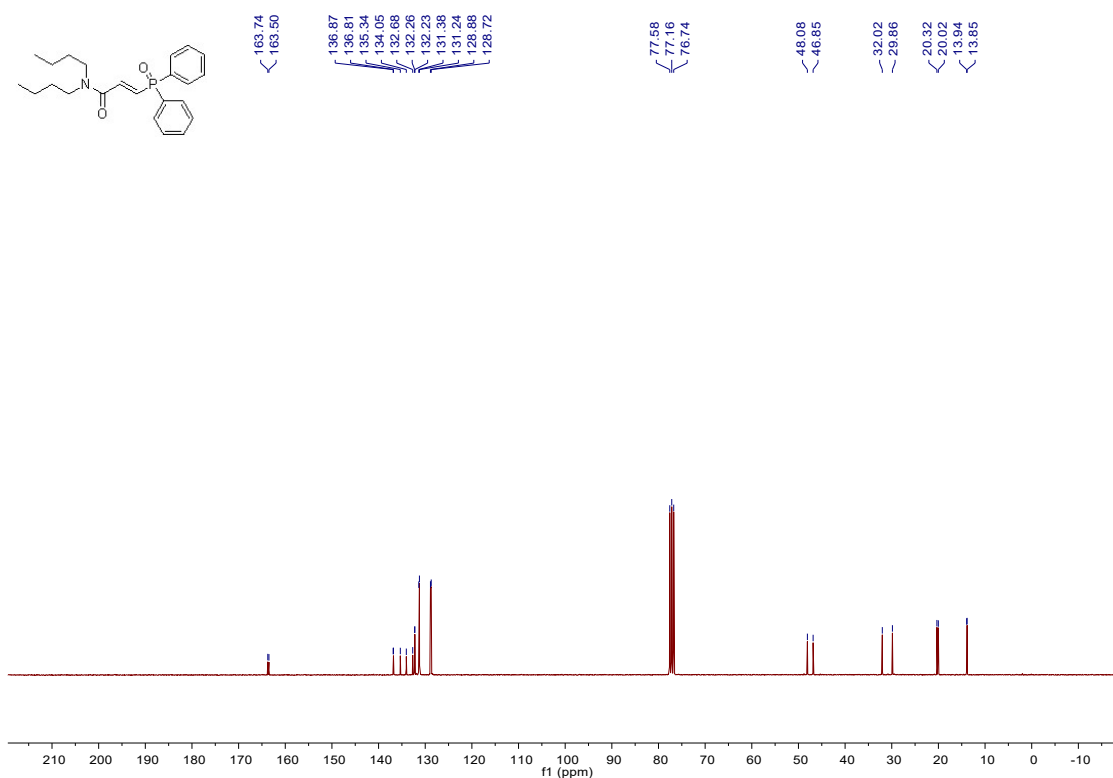

<sup>13</sup>C NMR of compound 3gk

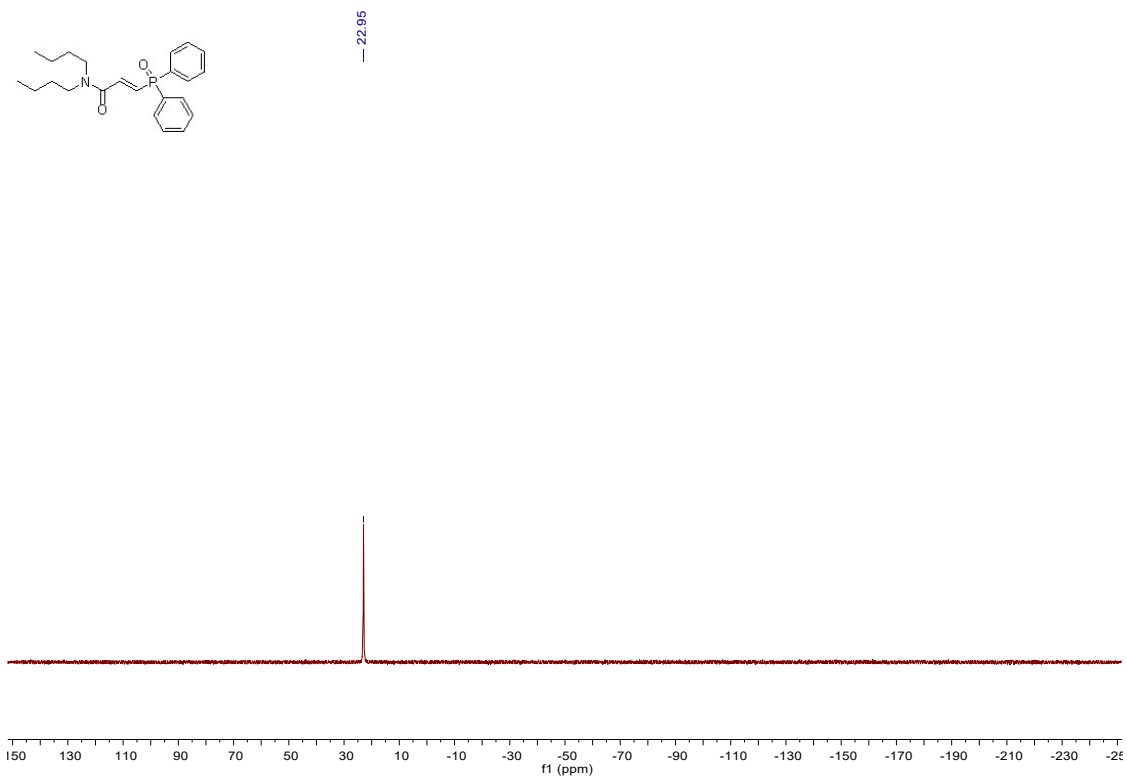

<sup>31</sup>P NMR of compound **3gk**

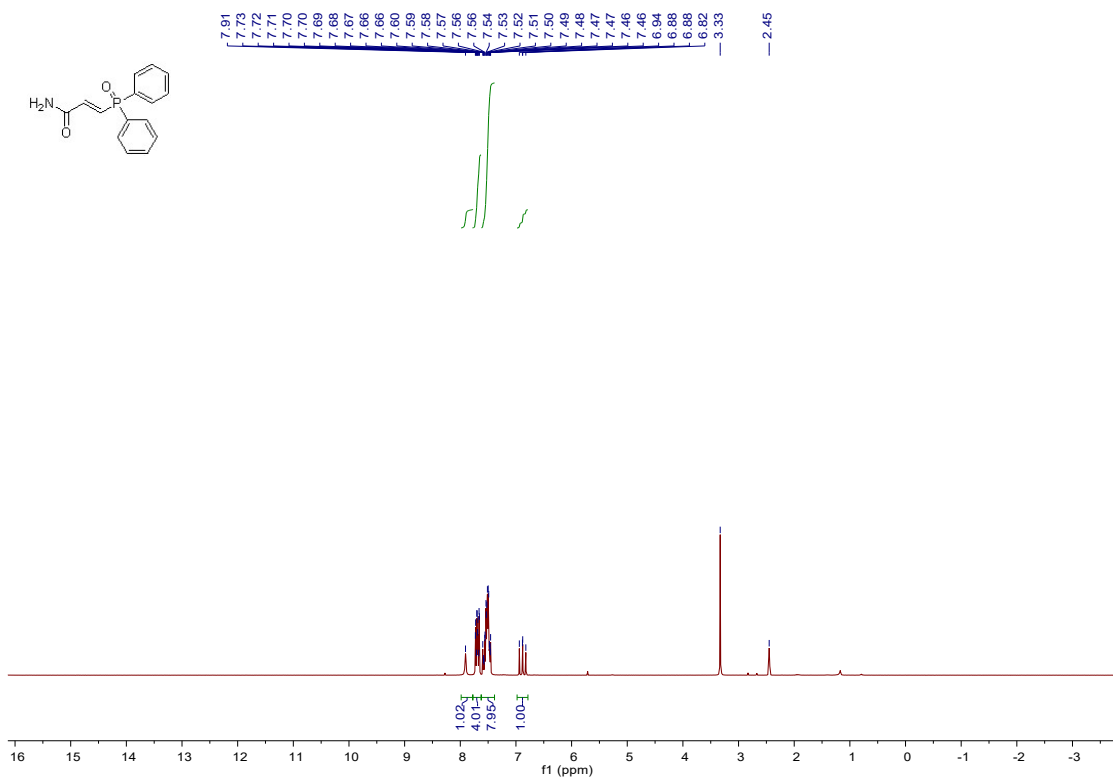

<sup>1</sup>H NMR of compound **3hk**

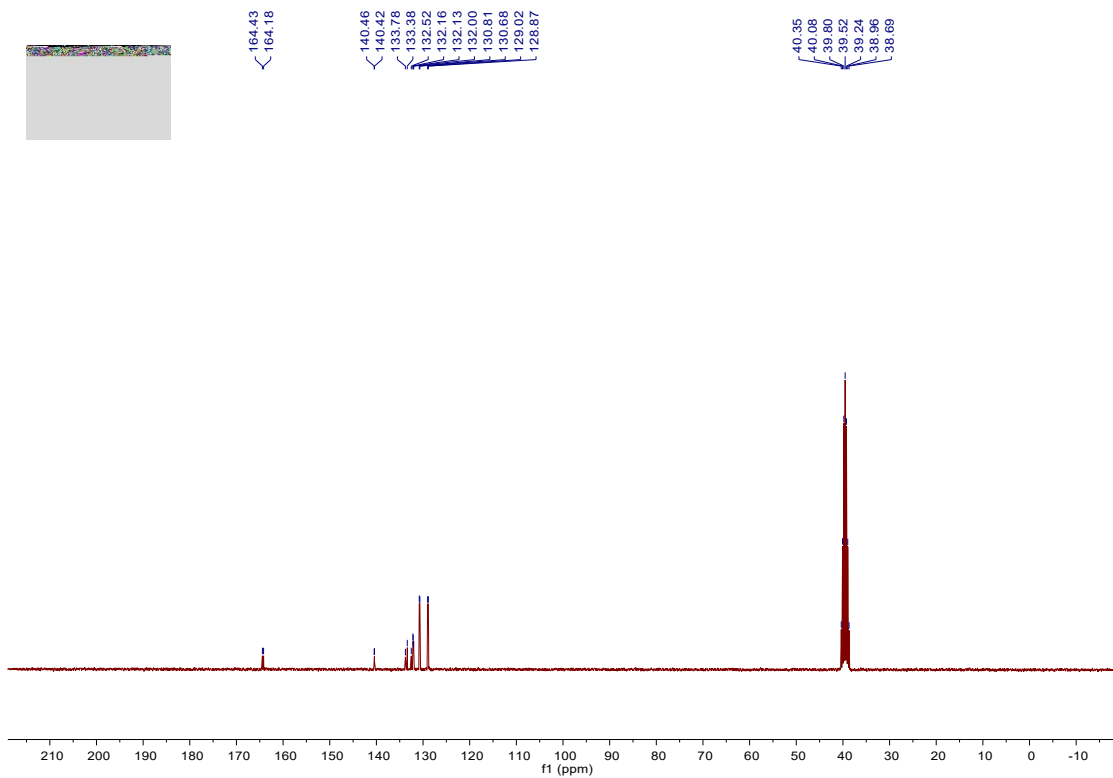

<sup>13</sup>C NMR of compound **3hk**

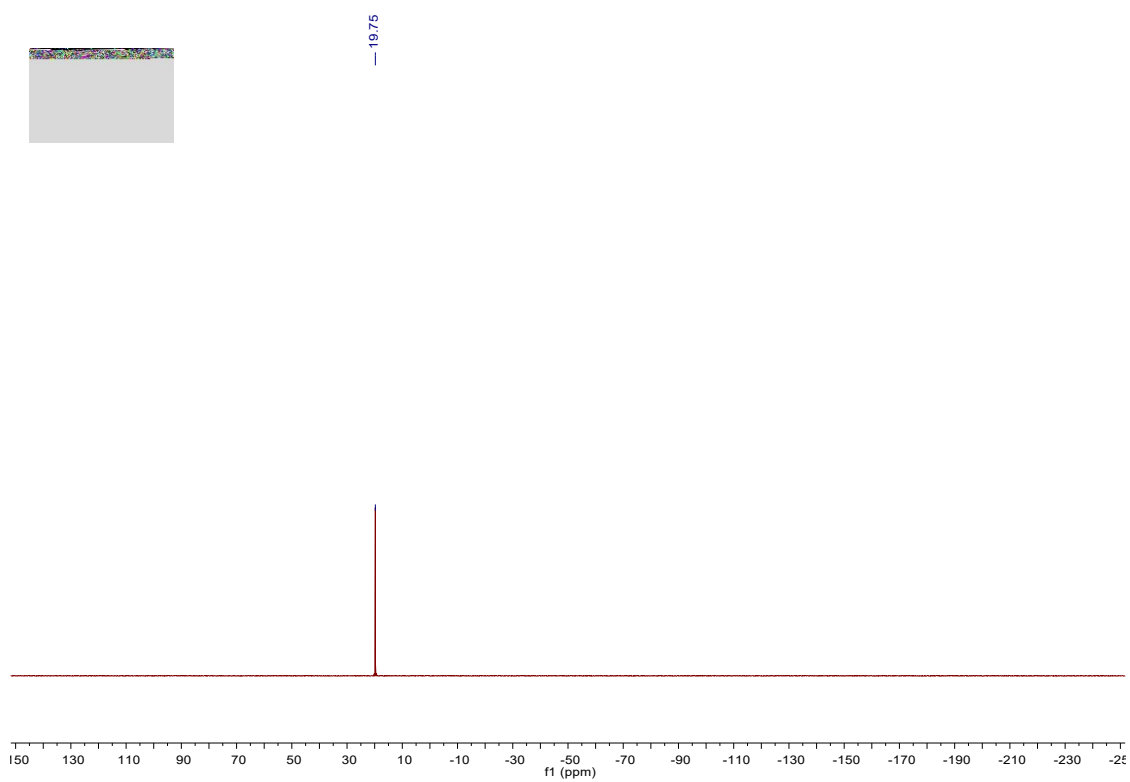

<sup>31</sup>P NMR of compound **3hk**



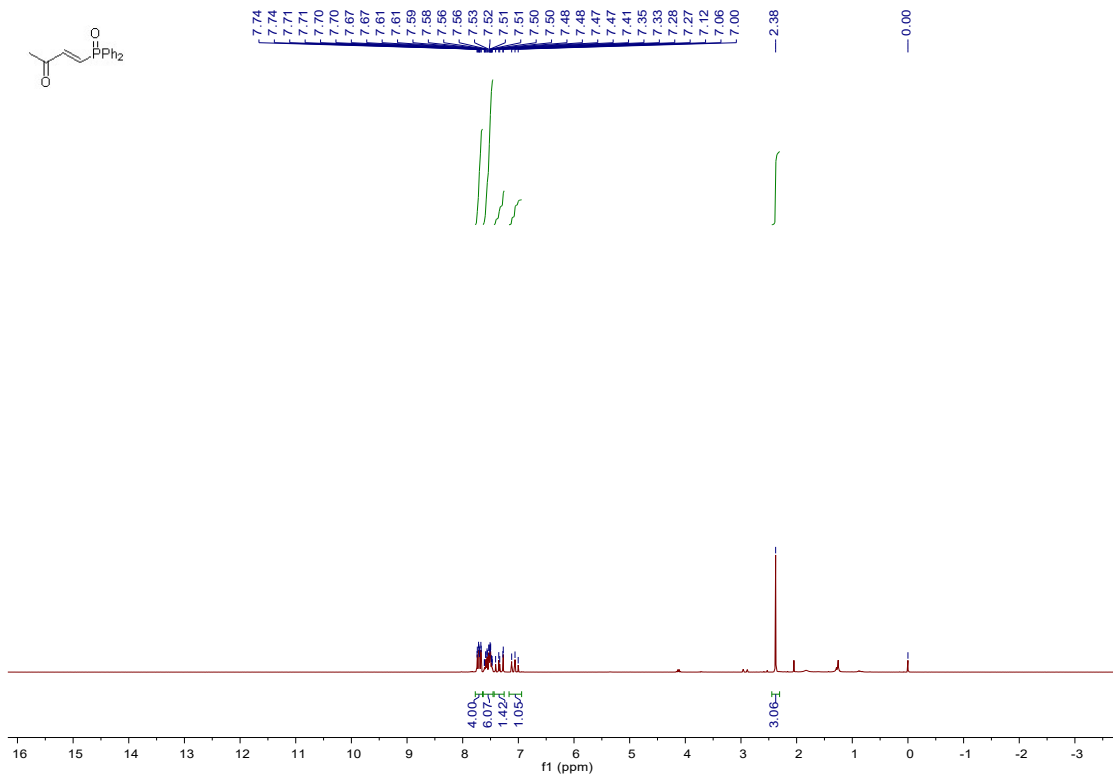

**<sup>1</sup>H NMR of compound 3ik**

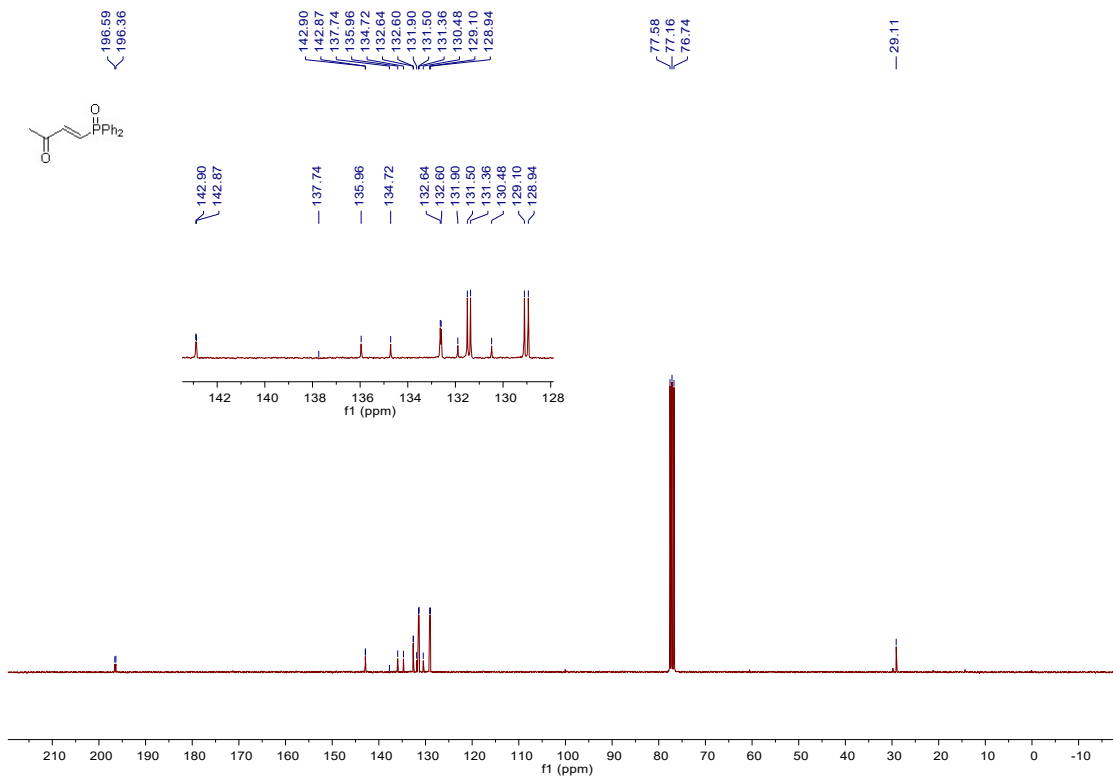

**<sup>13</sup>C NMR of compound 3ik**

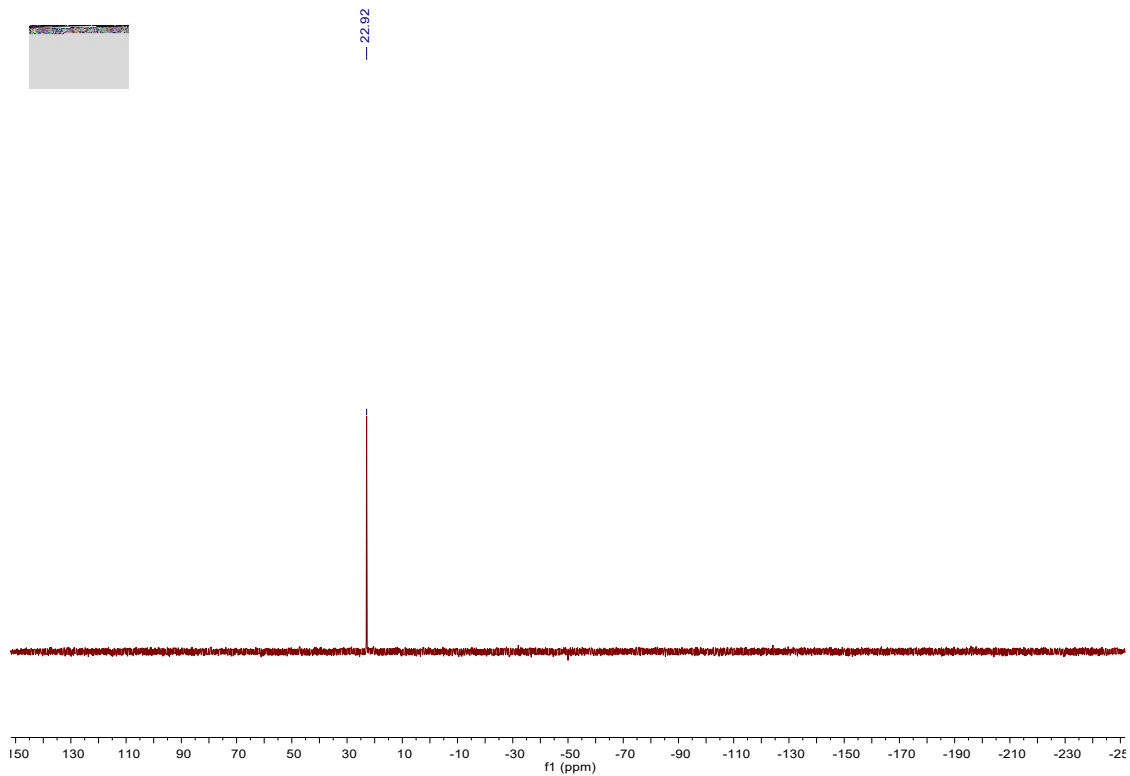

31P NMR of compound 3ik

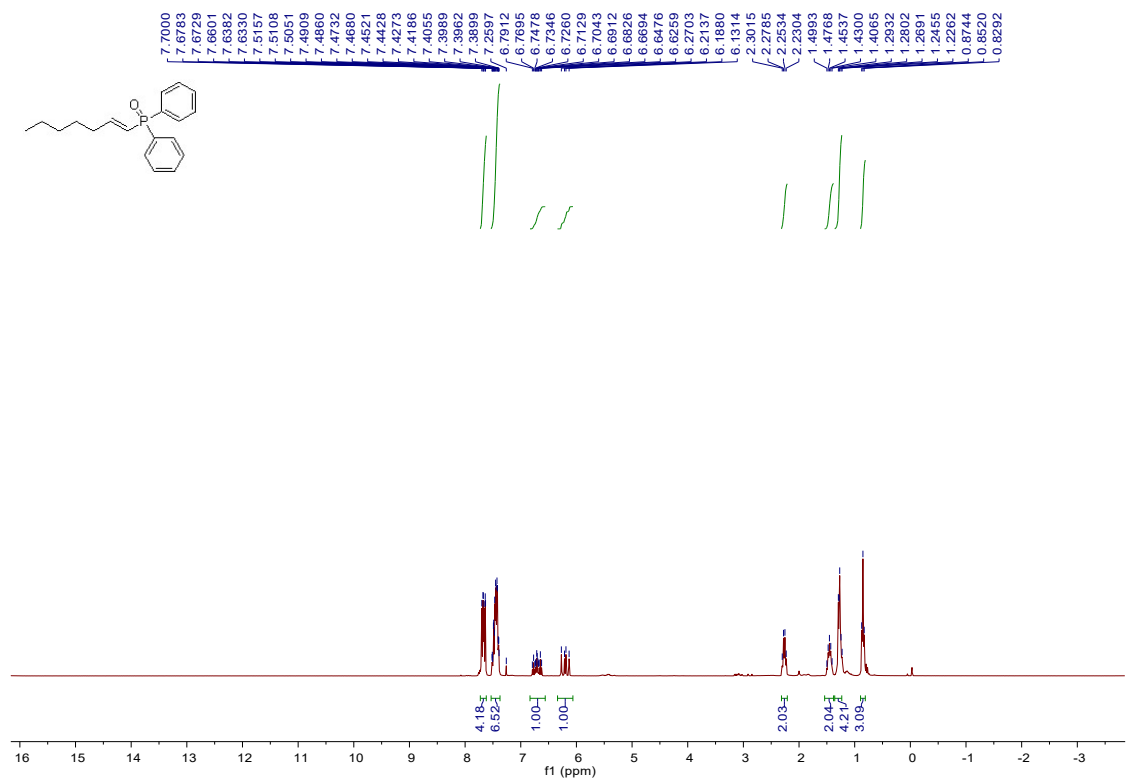

1H NMR of compound 3jk

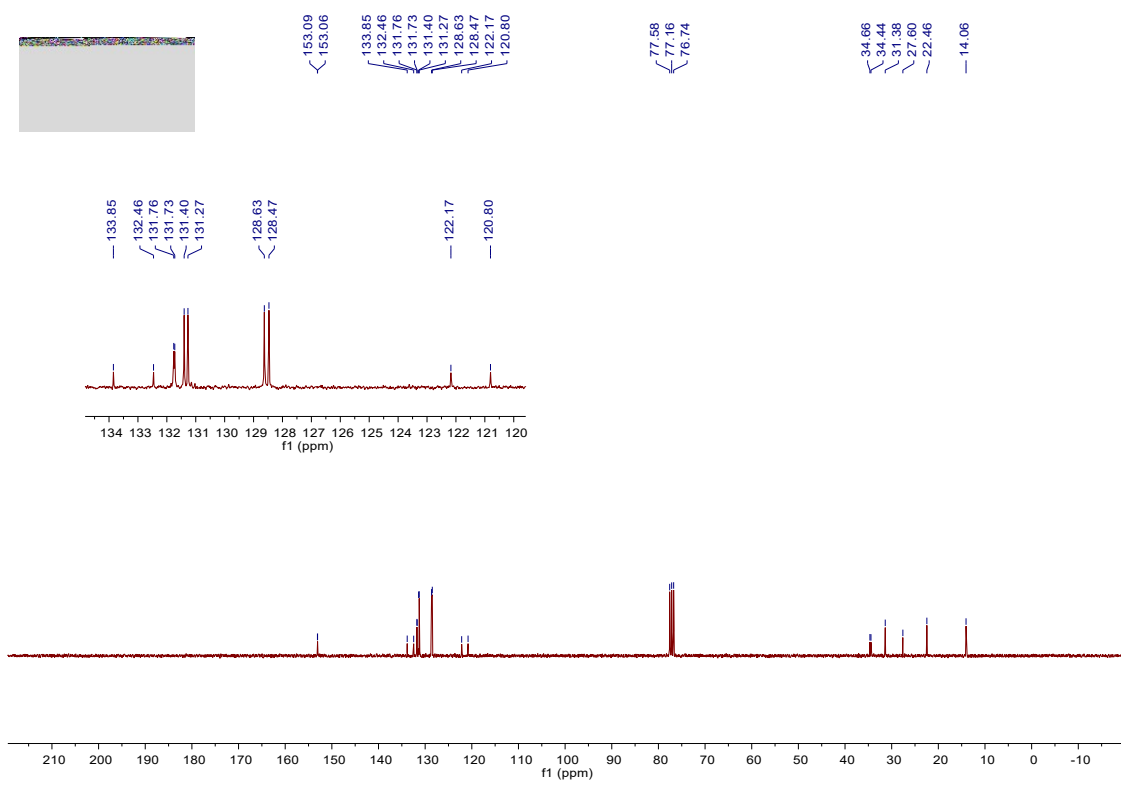

<sup>13</sup>C NMR of compound 3jk

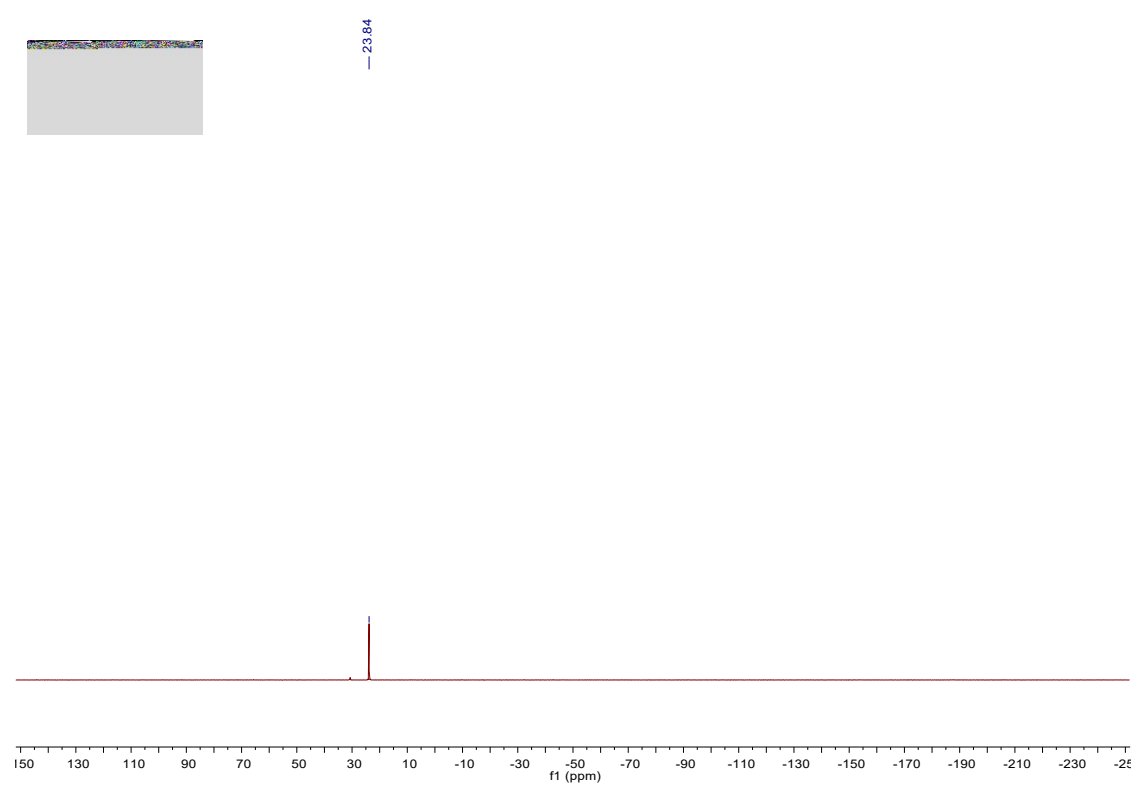

<sup>31</sup>P NMR of compound 3jk

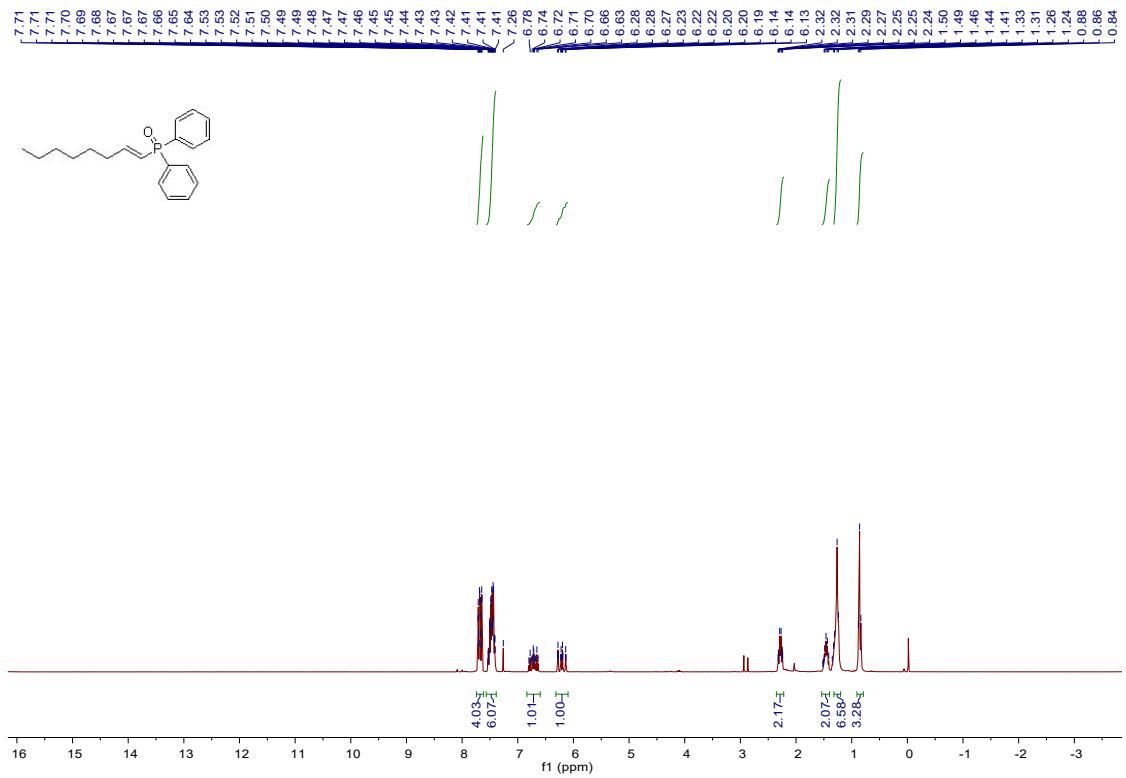

<sup>1</sup>H NMR of compound 3kk

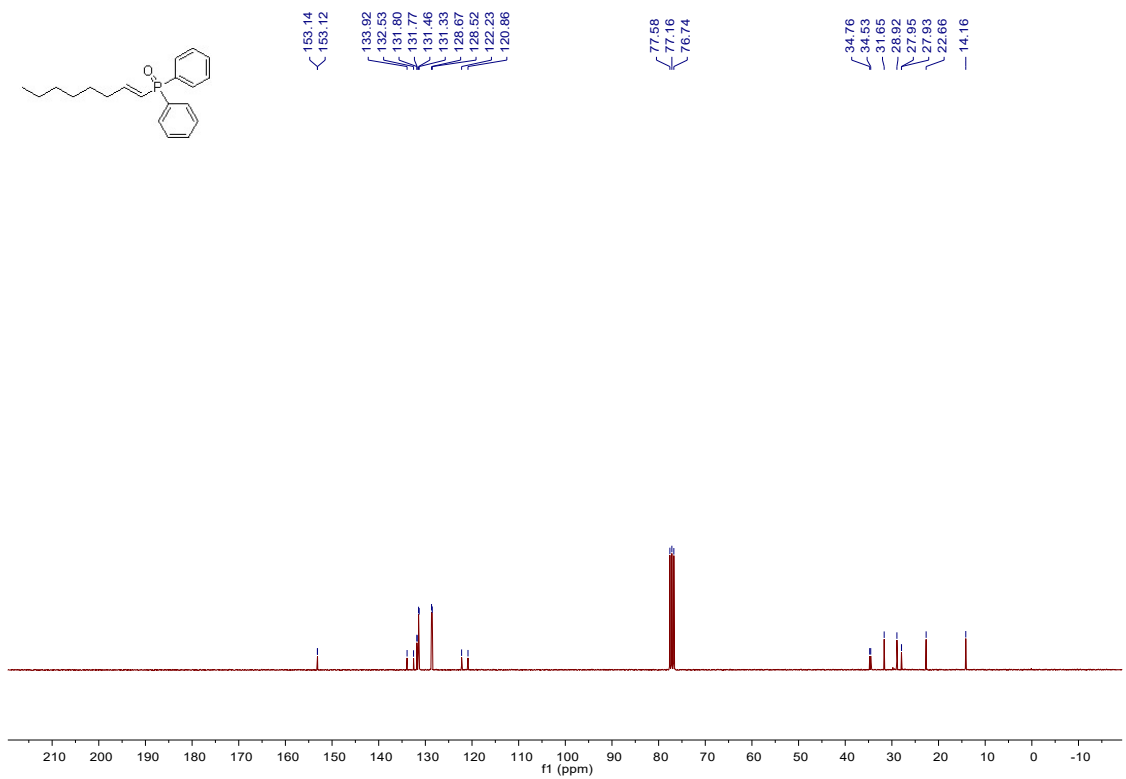

<sup>13</sup>C NMR of compound 3kk

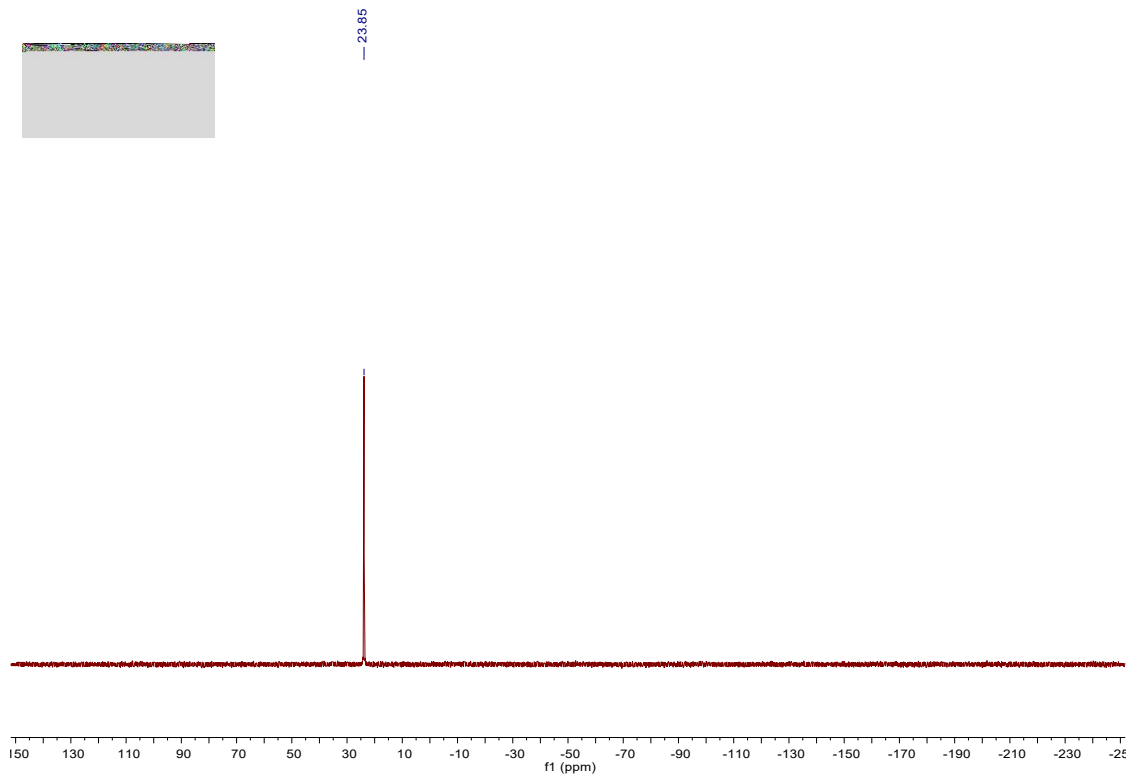

<sup>31</sup>P NMR of compound 3kk

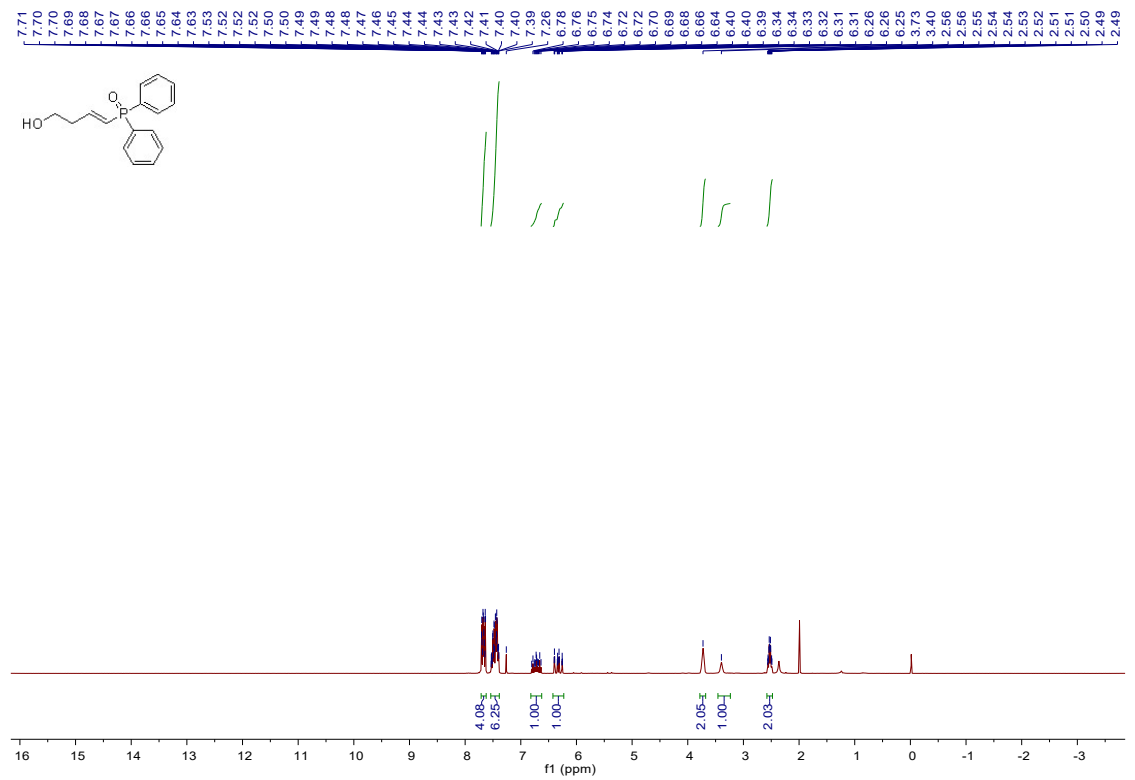

<sup>1</sup>H NMR of compound 3kk

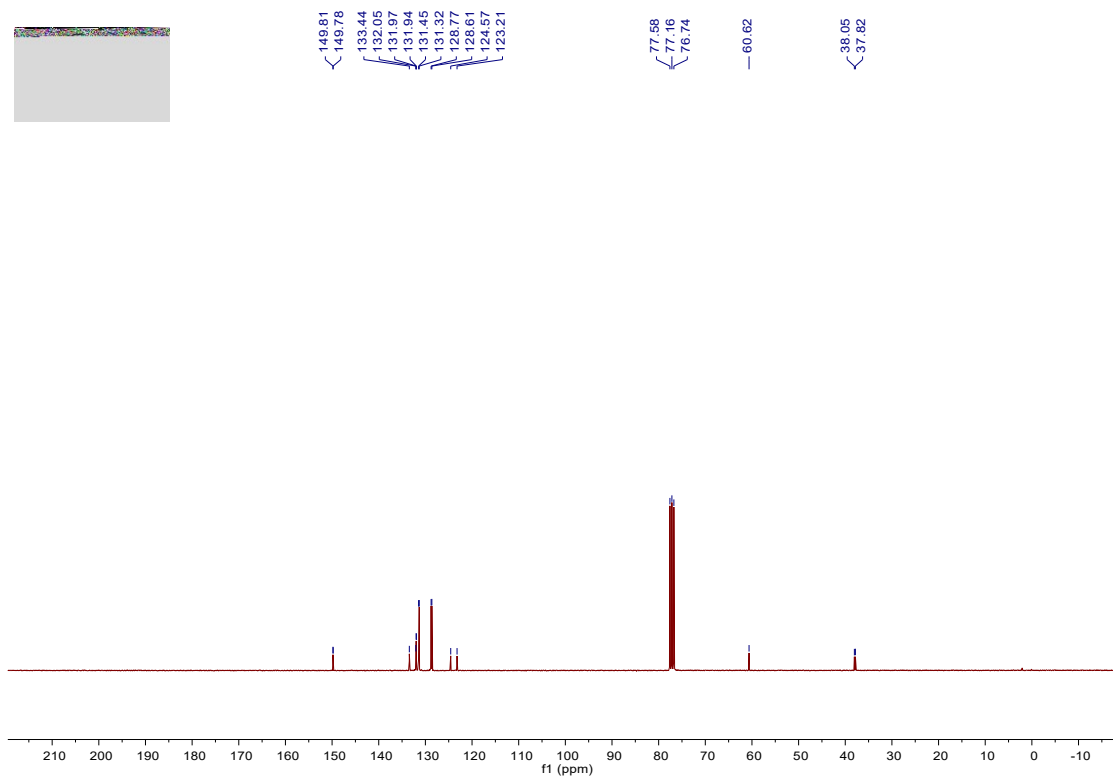

<sup>13</sup>C NMR of compound **3Ik**

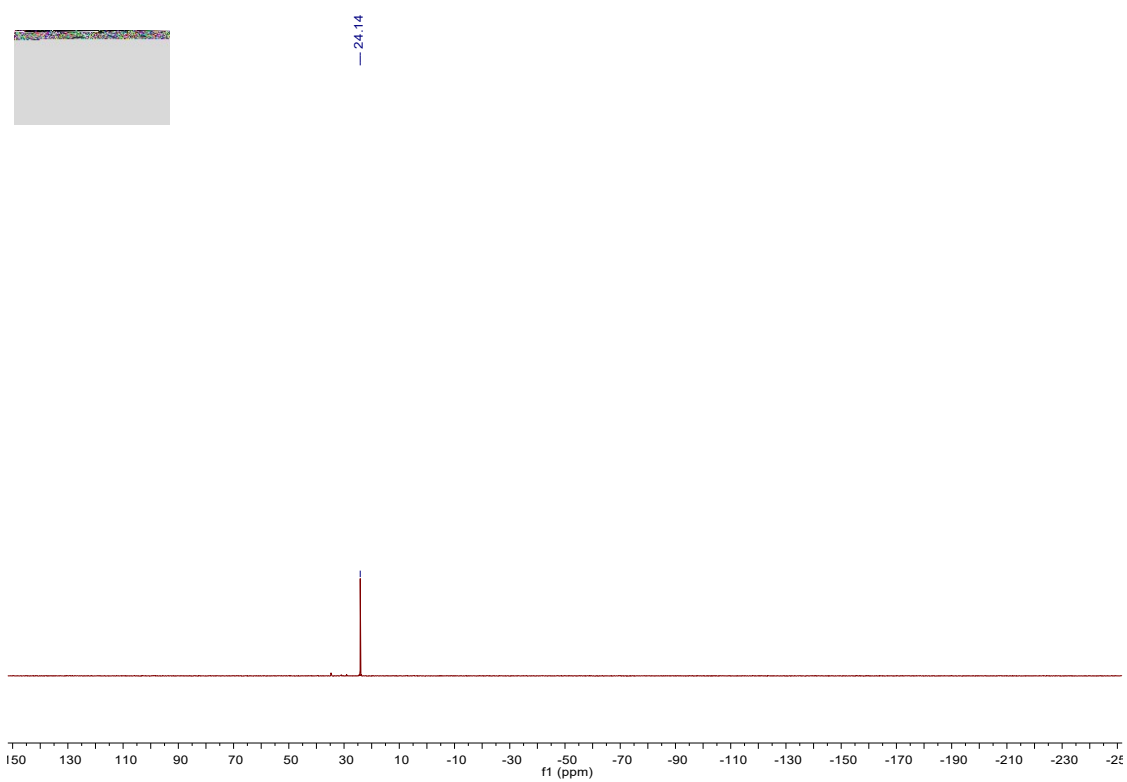

<sup>31</sup>P NMR of compound **3Ik**

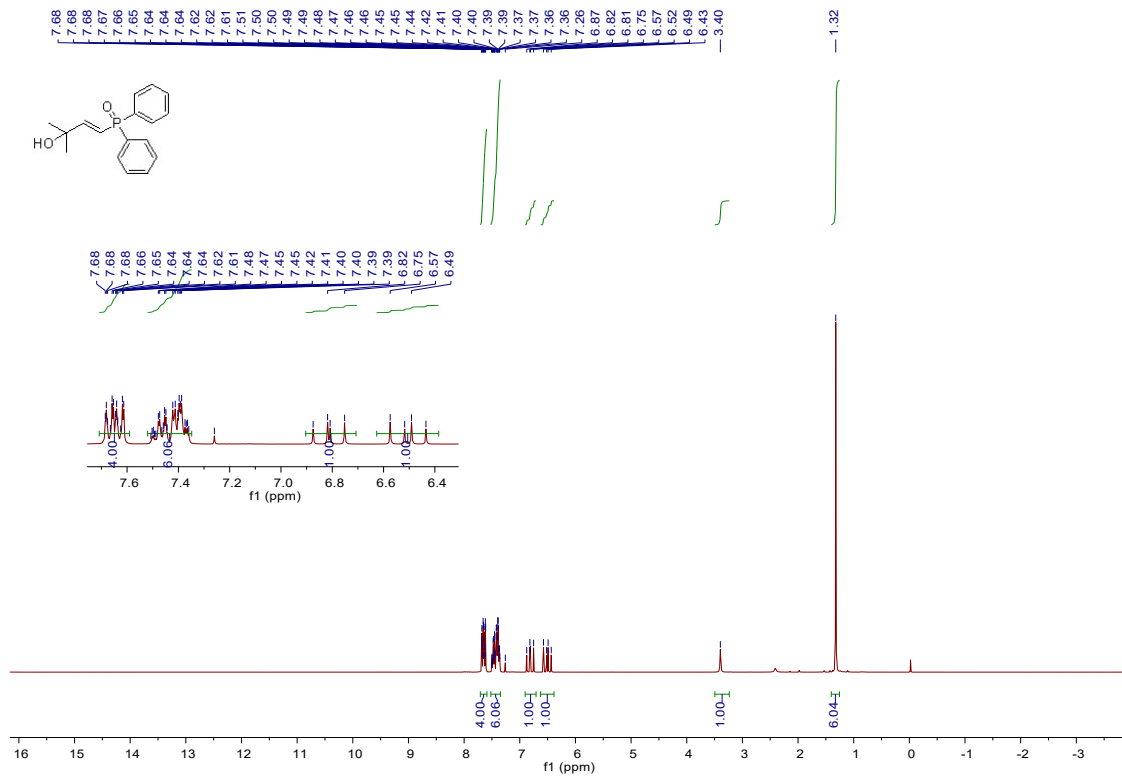

<sup>1</sup>H NMR of compound 3mk

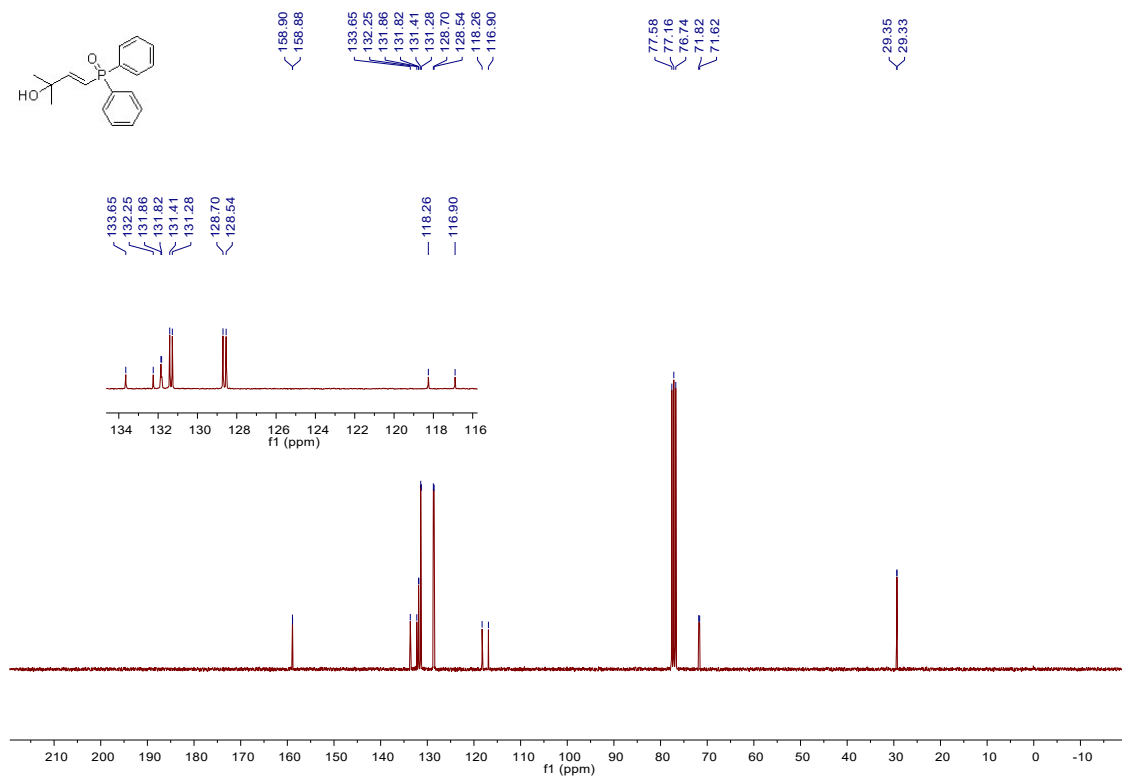

<sup>13</sup>C NMR of compound 3mk

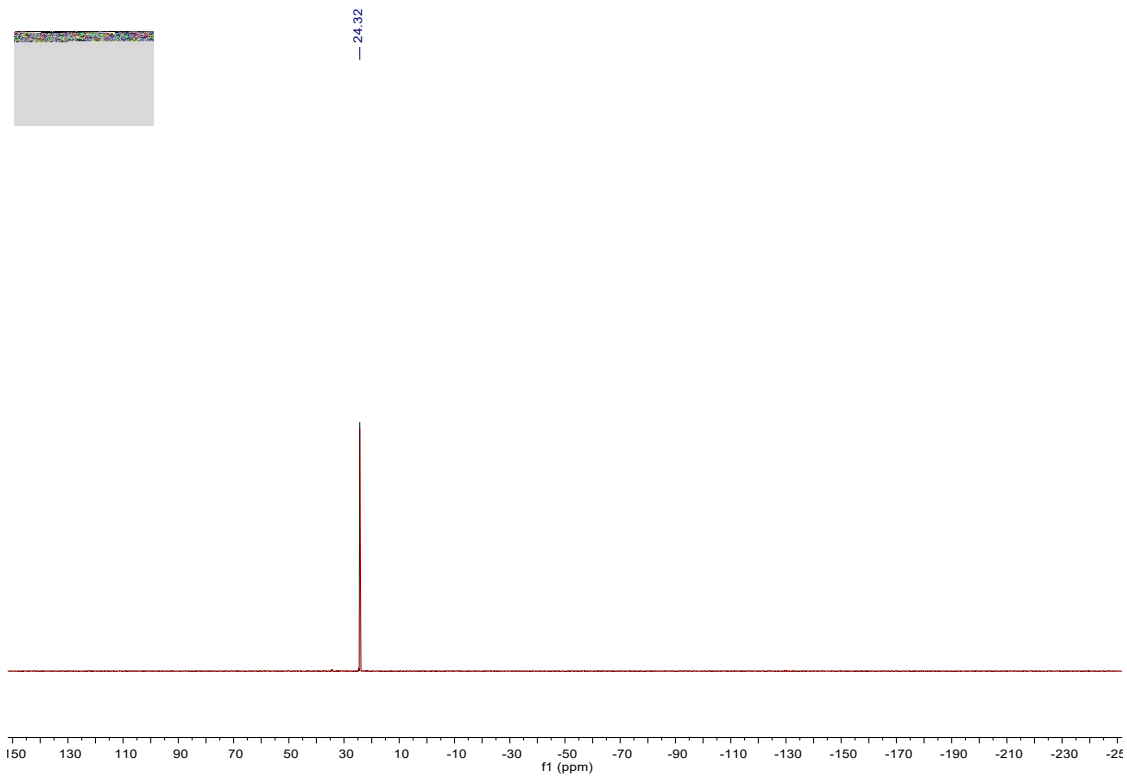

31P NMR of compound 3mk

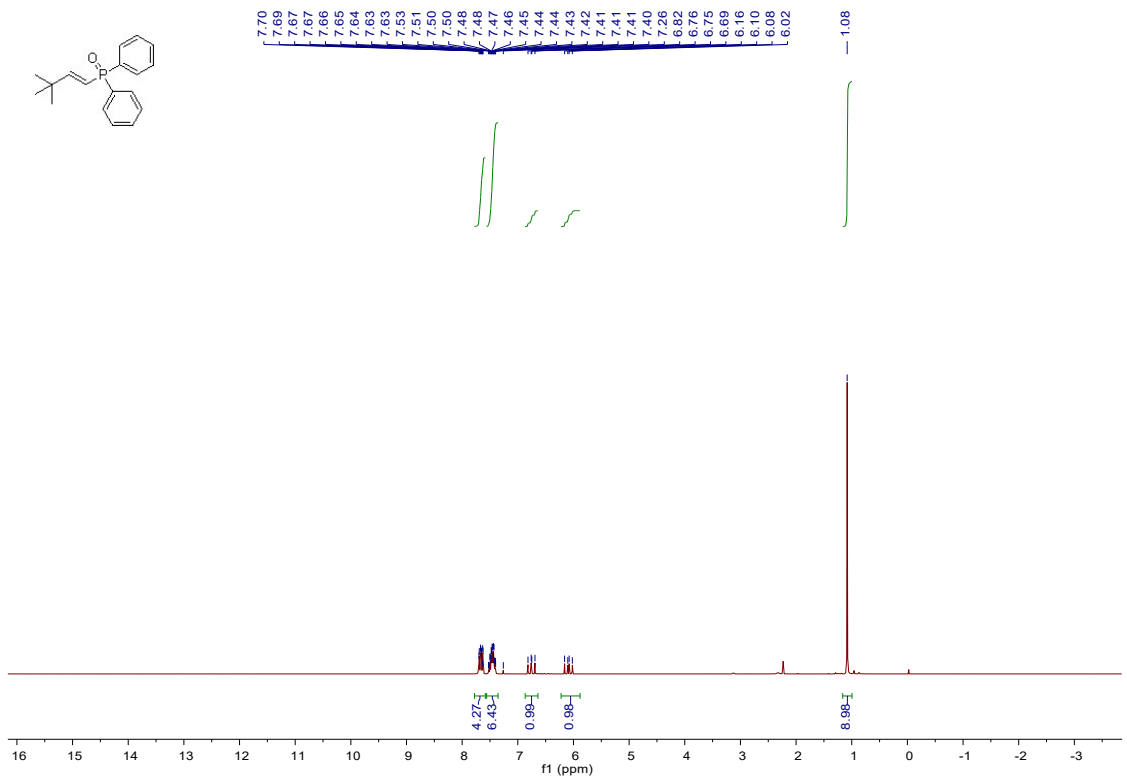

1H NMR of compound 3mk



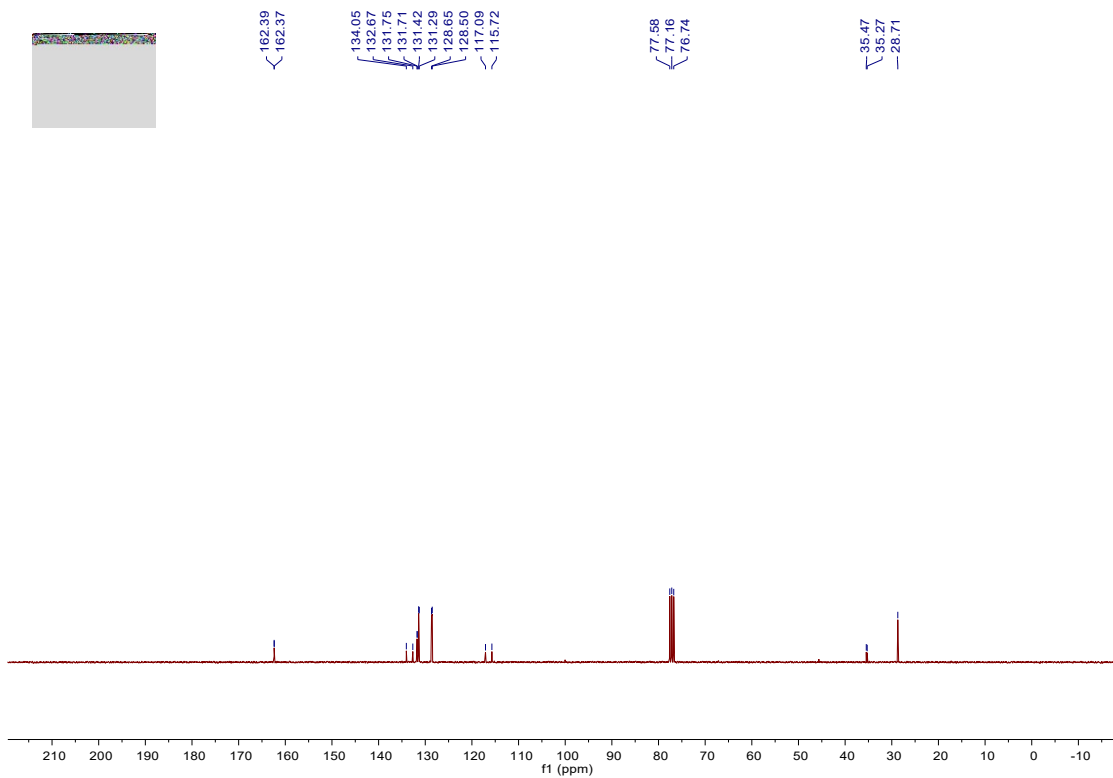

<sup>13</sup>C NMR of compound **3nk**

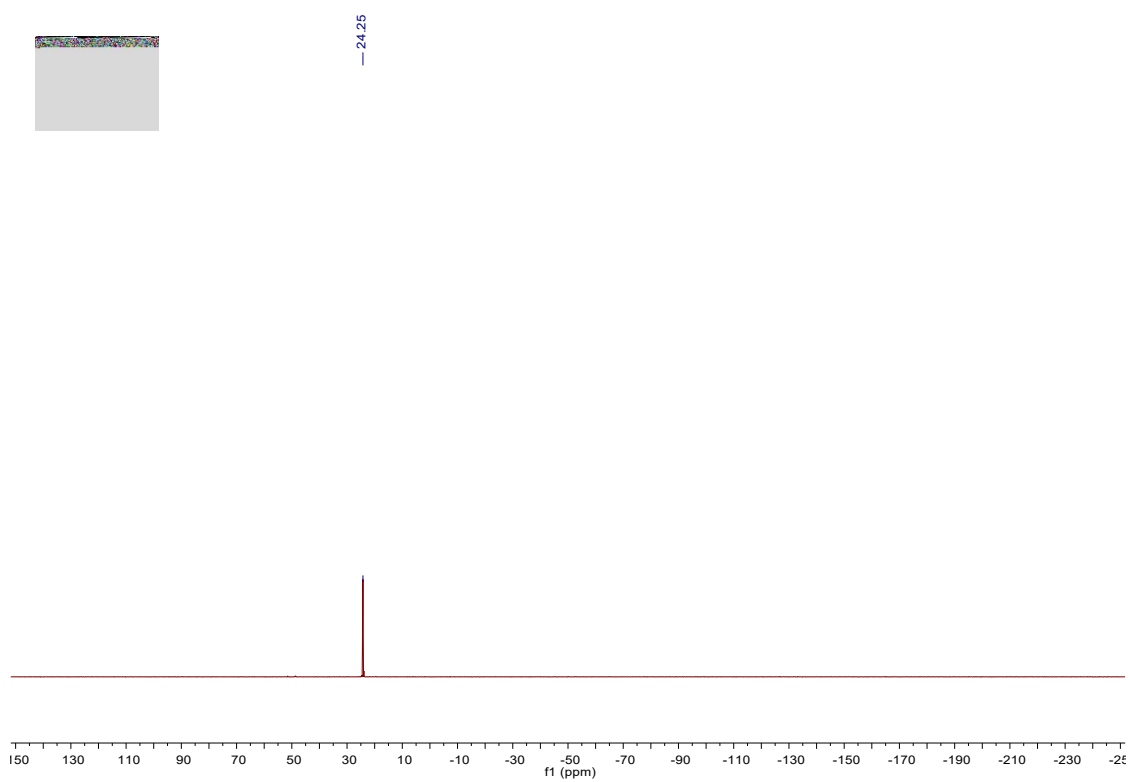

<sup>31</sup>P NMR of compound **3nk**

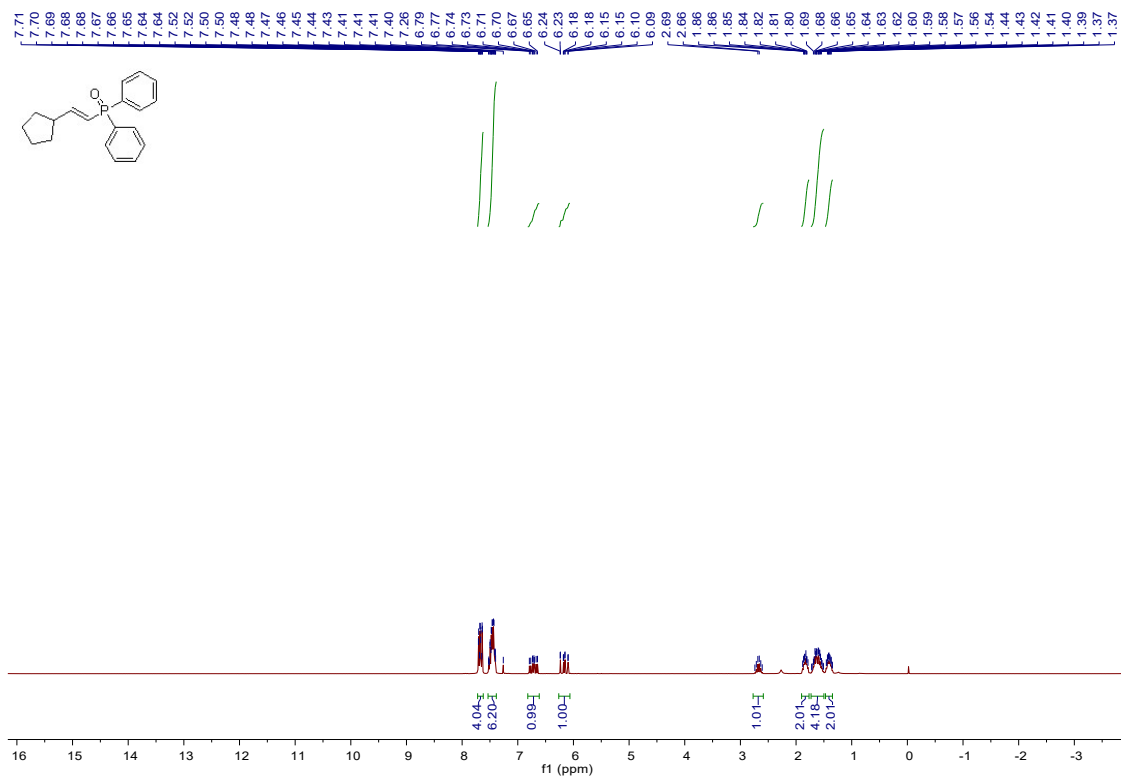

**<sup>1</sup>H NMR of compound 3ok**

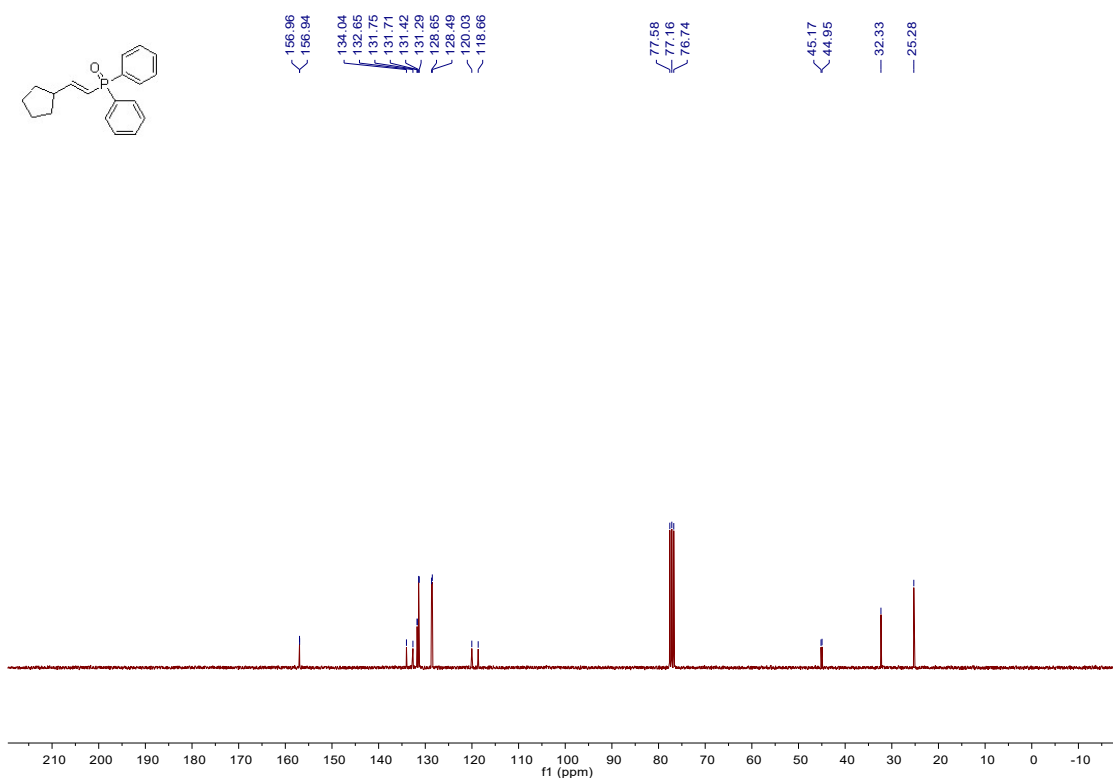

**<sup>13</sup>C NMR of compound 3ok**

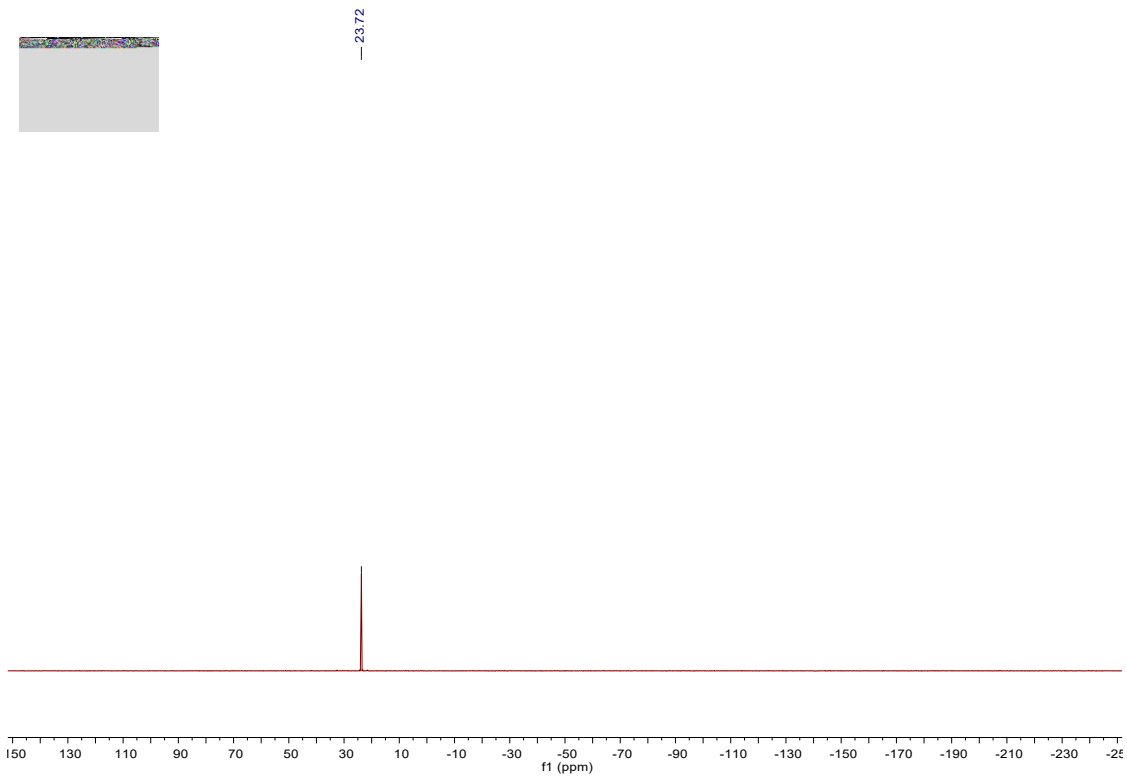

31P NMR of compound **3ok**

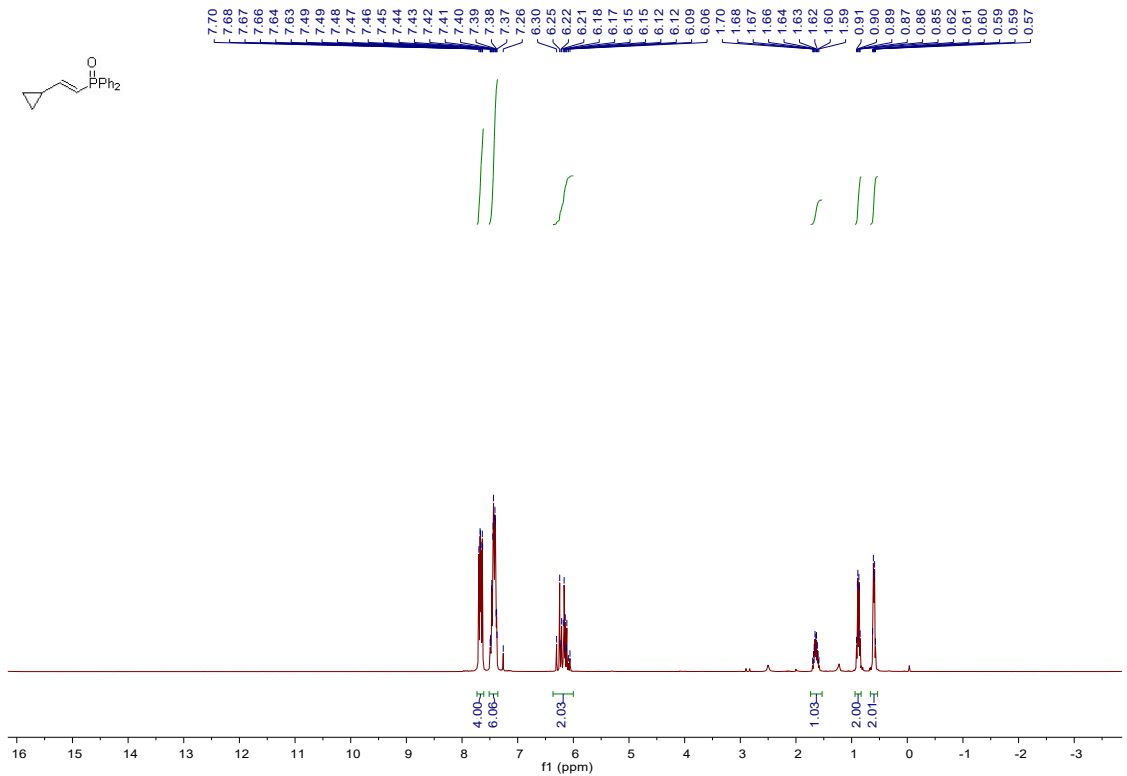

1H NMR of compound **3pk**

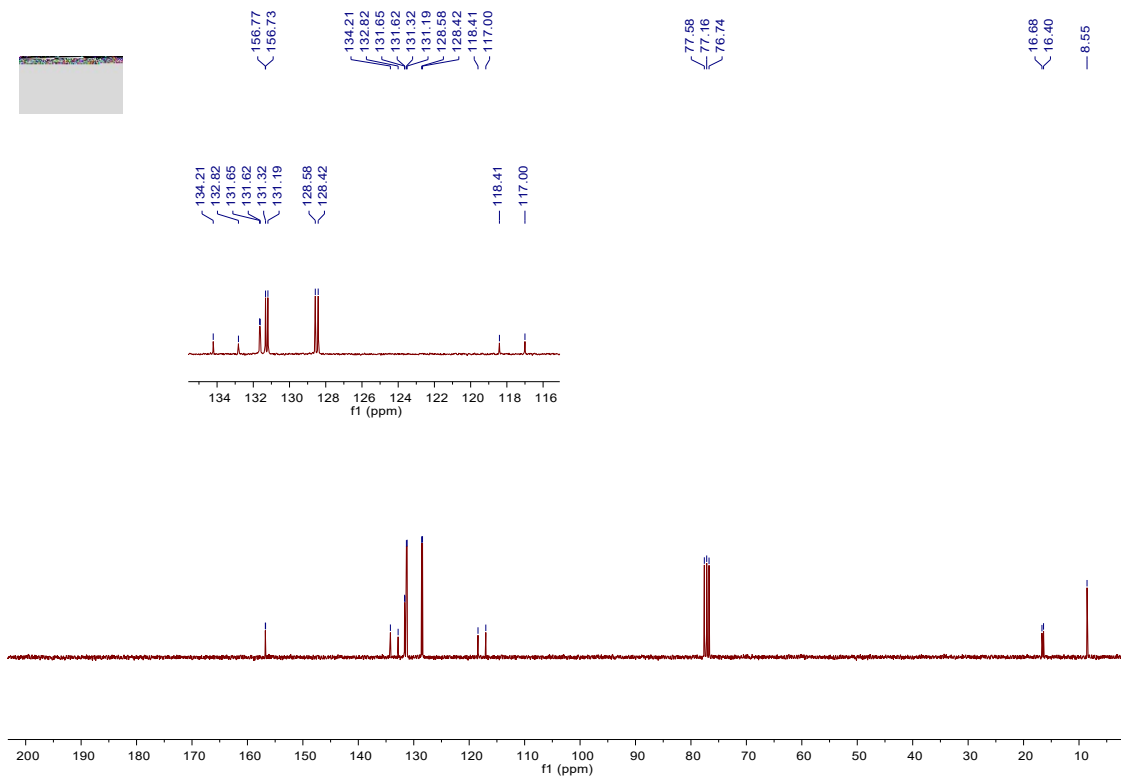

**<sup>13</sup>C NMR of compound 3pk**

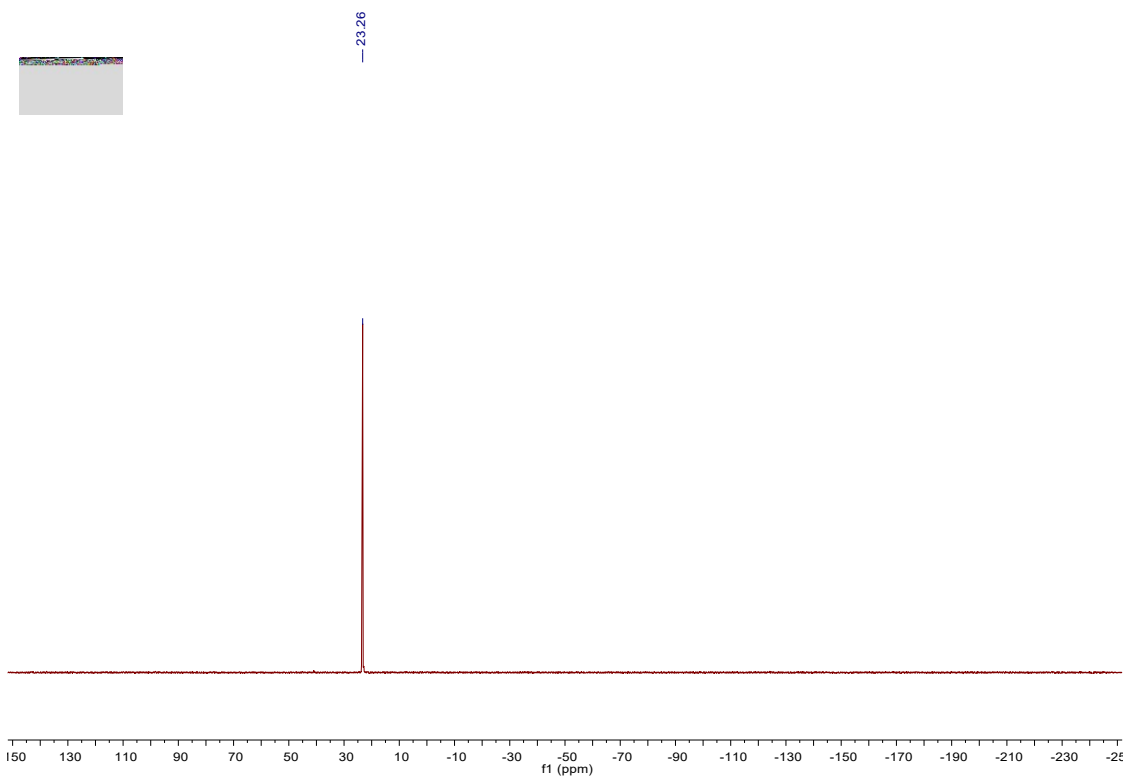

**<sup>31</sup>P NMR of compound 3pk**

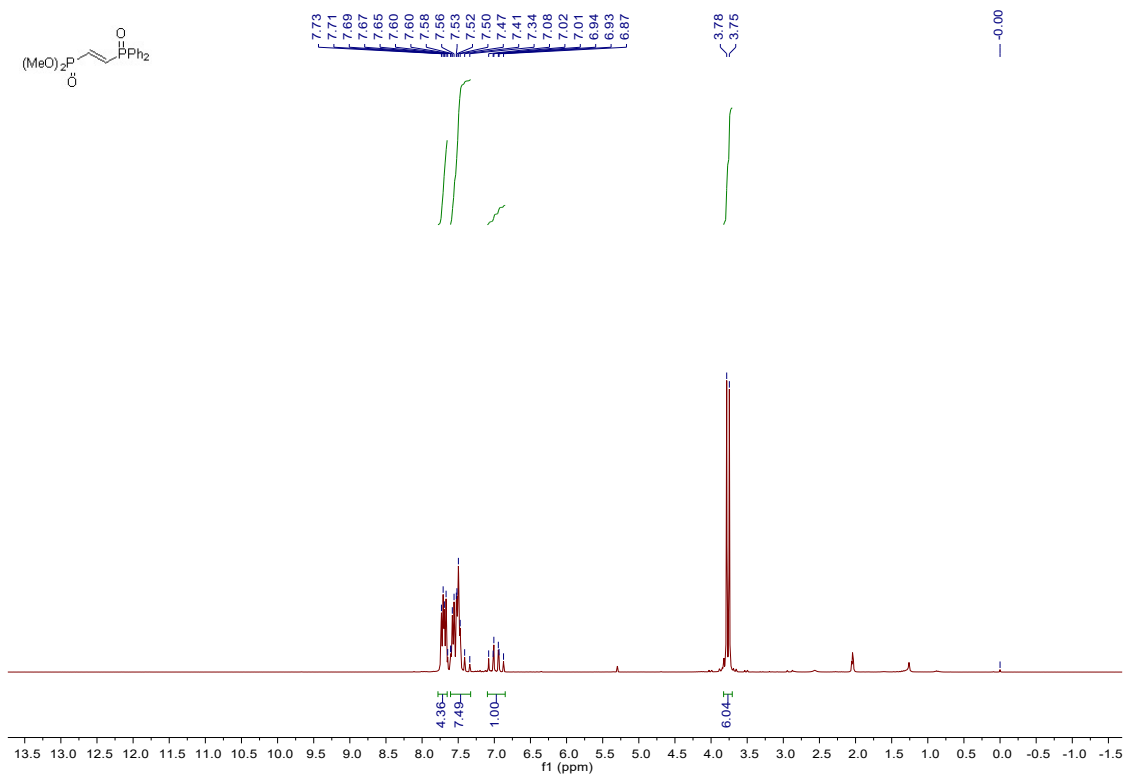

<sup>1</sup>H NMR of compound **3qk**

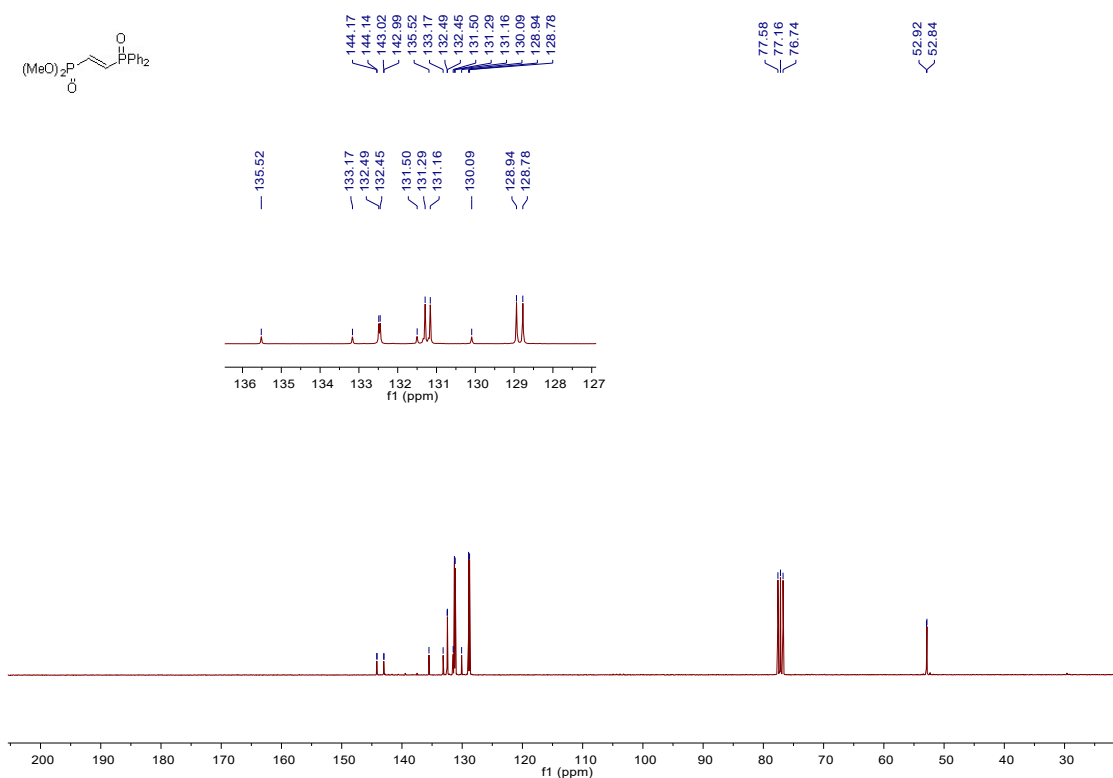

<sup>13</sup>C NMR of compound **3qk**

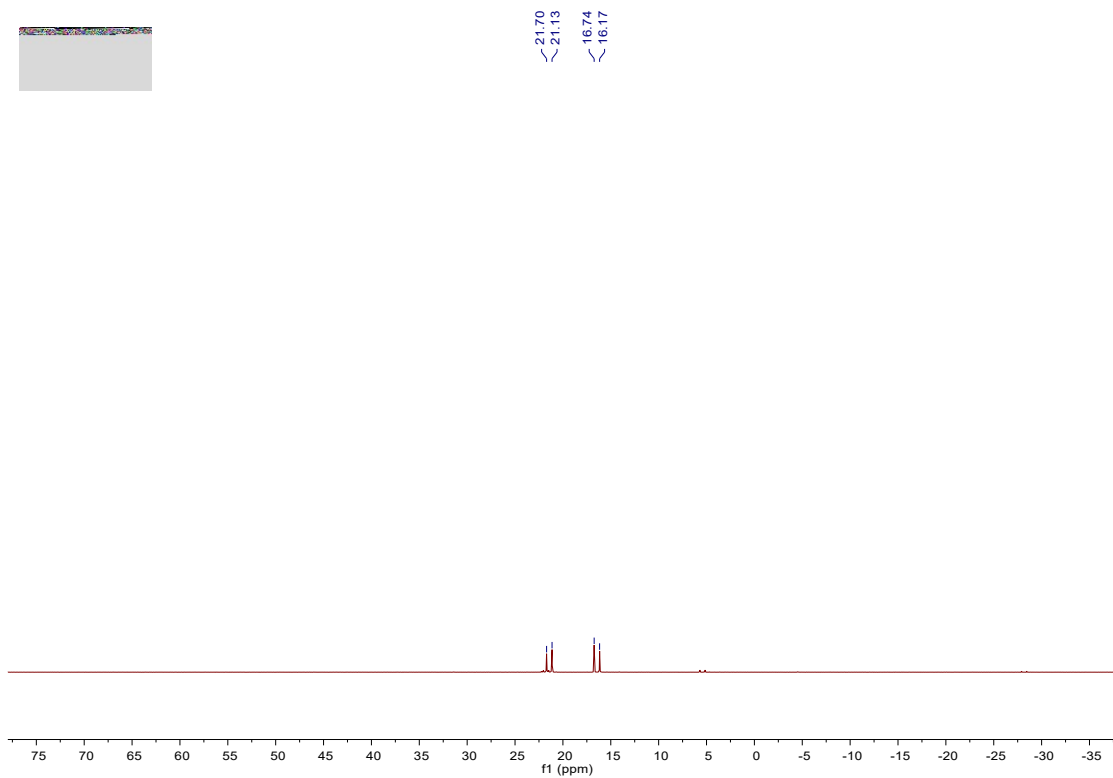

<sup>31</sup>P NMR of compound 3qk

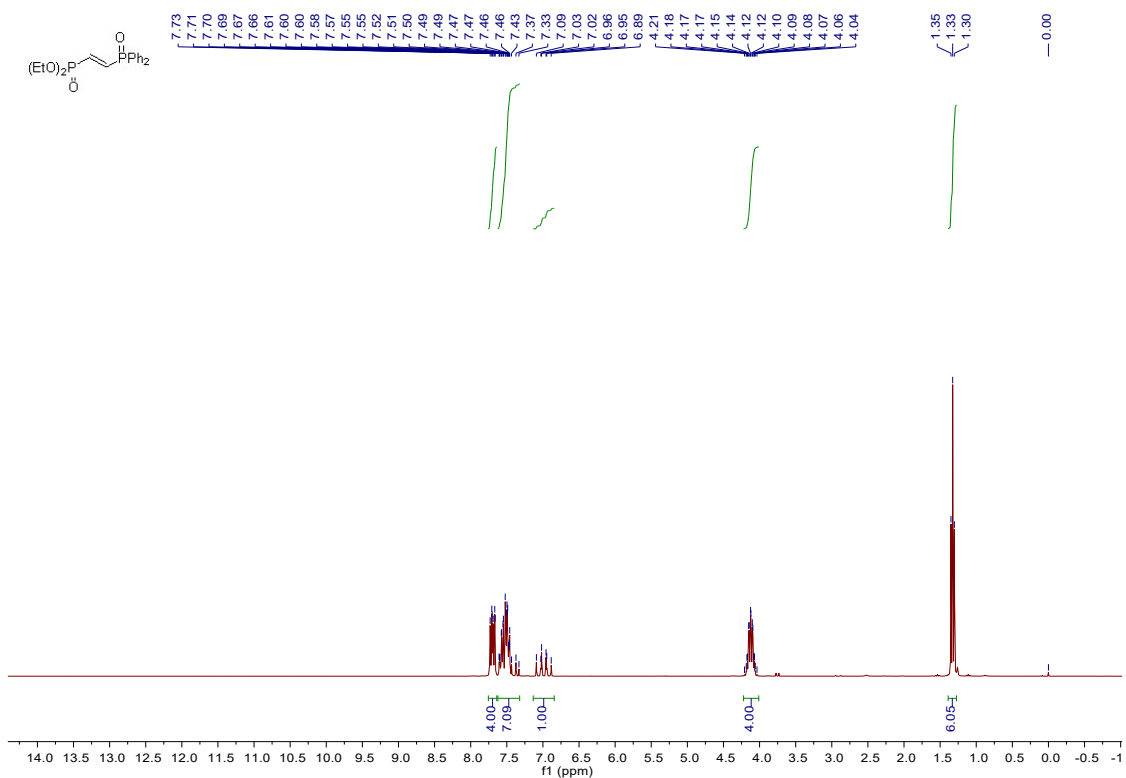

<sup>1</sup>H NMR of compound 3rk

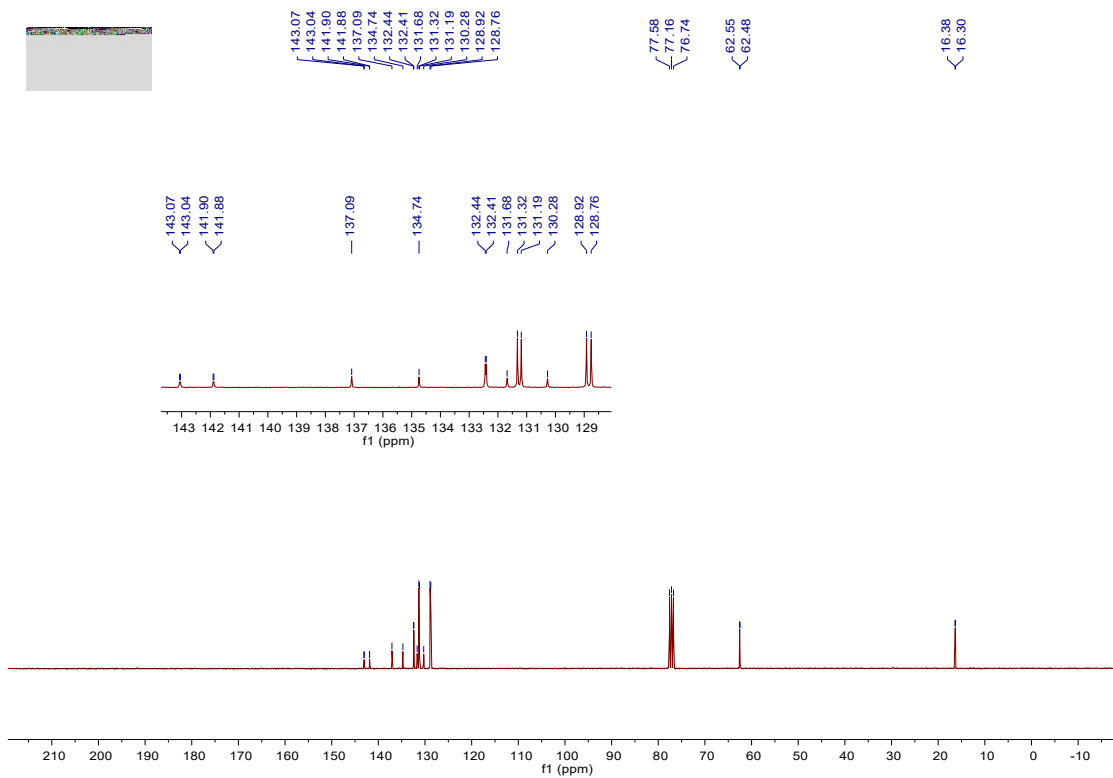

<sup>13</sup>C NMR of compound **3rk**

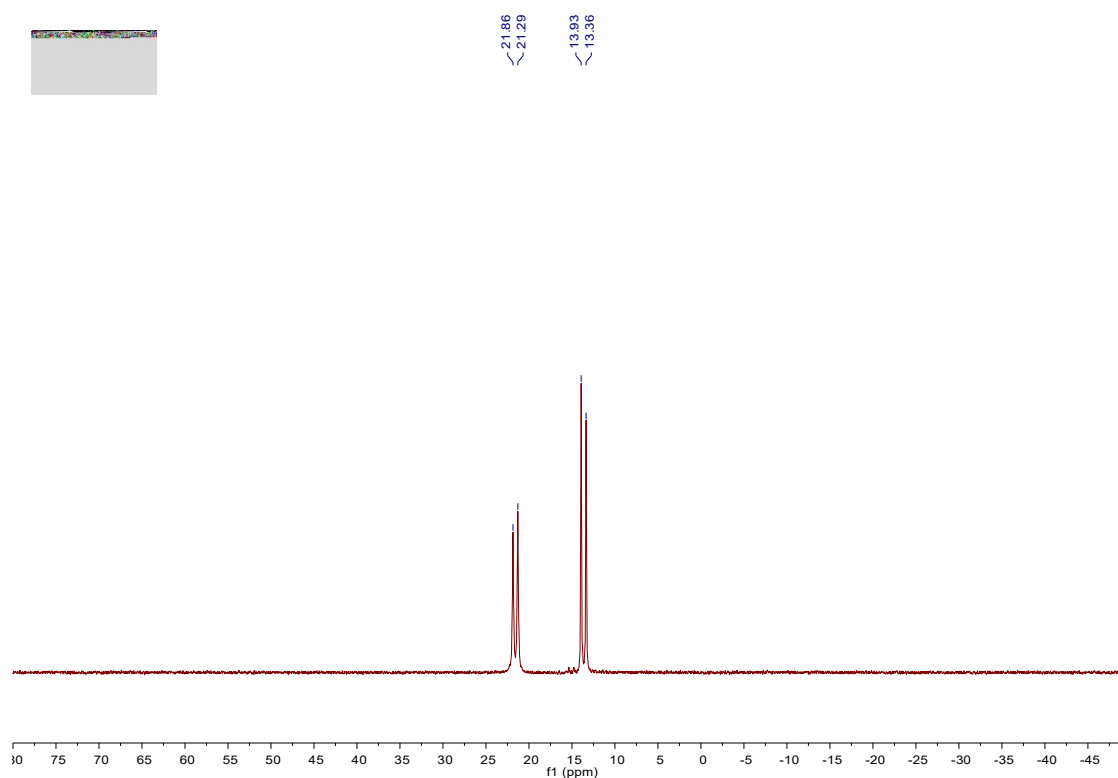

<sup>31</sup>P NMR of compound **3rk**

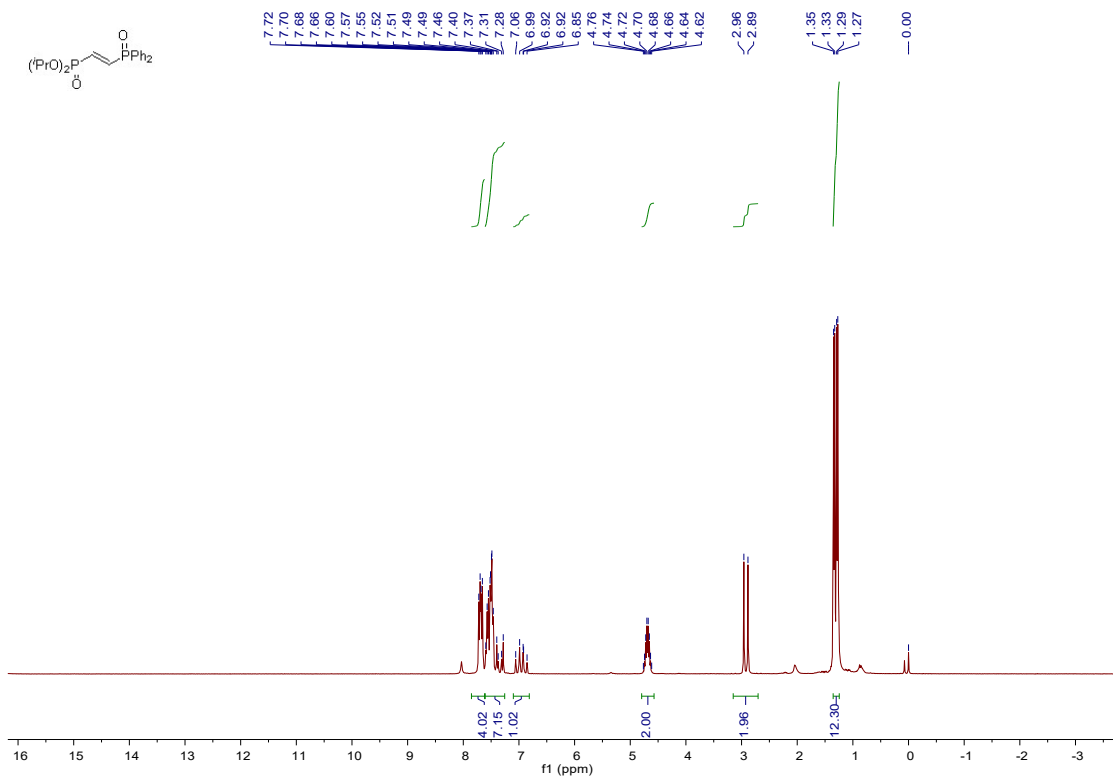

<sup>1</sup>H NMR of compound 3sk

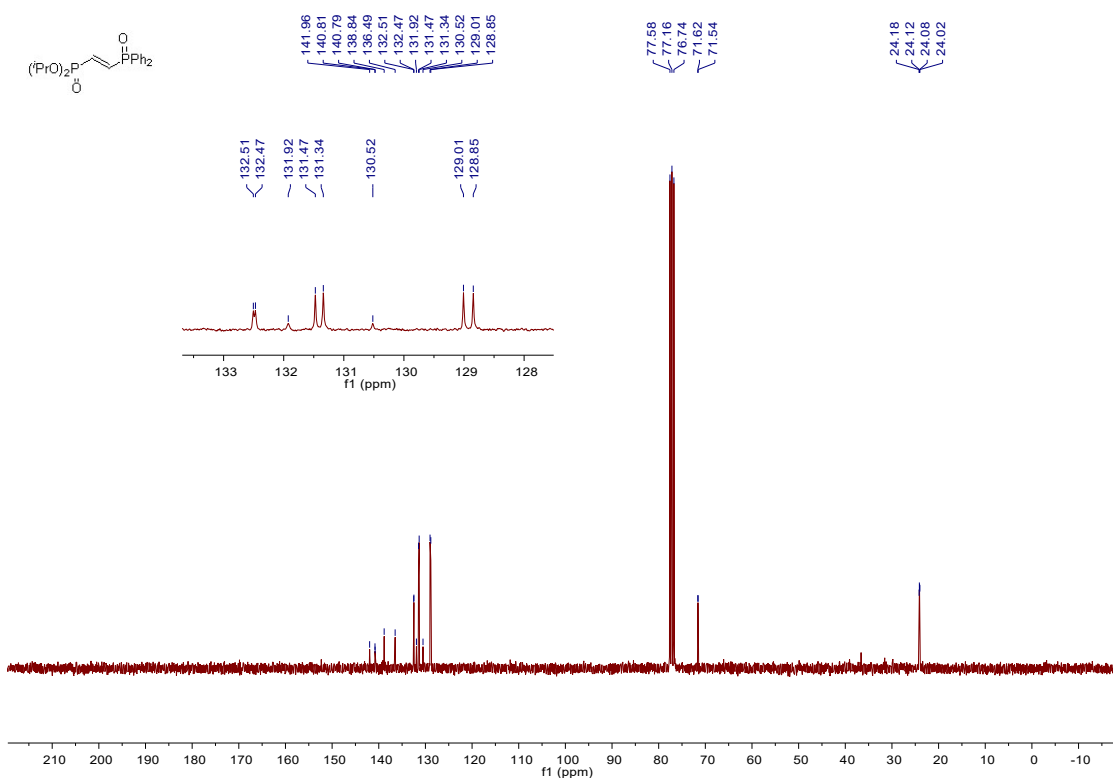

<sup>13</sup>C NMR of compound 3sk



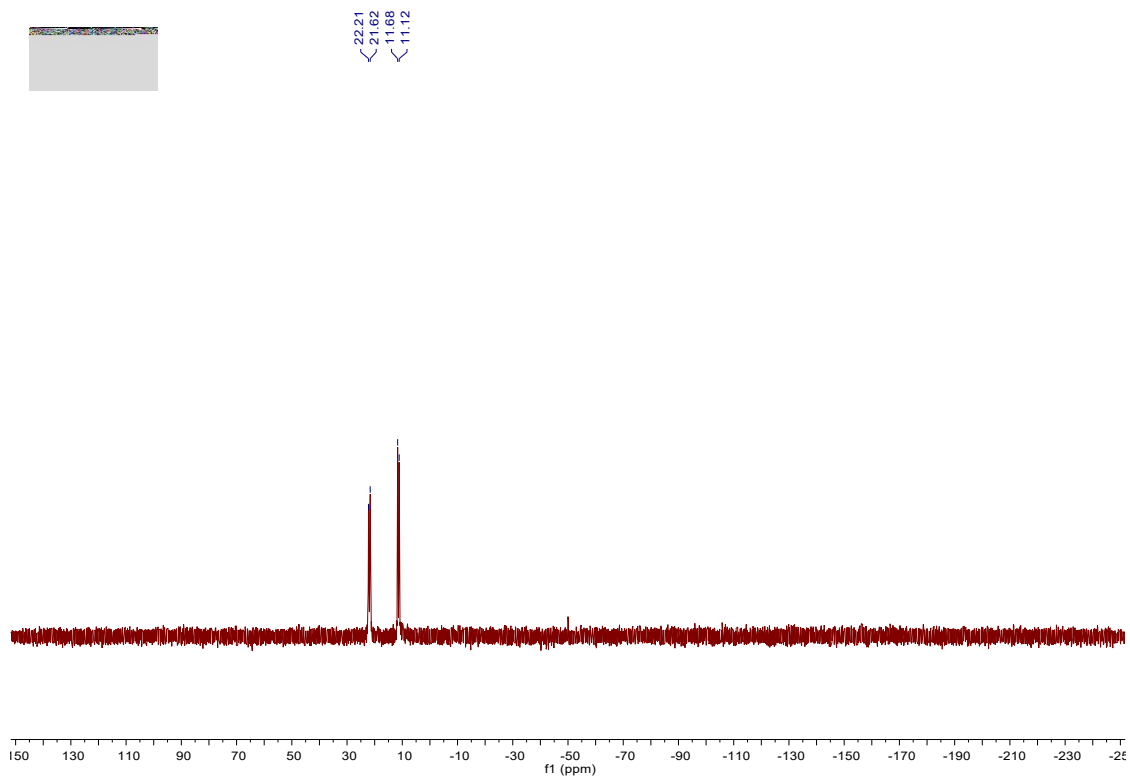

31P NMR of compound 3sk

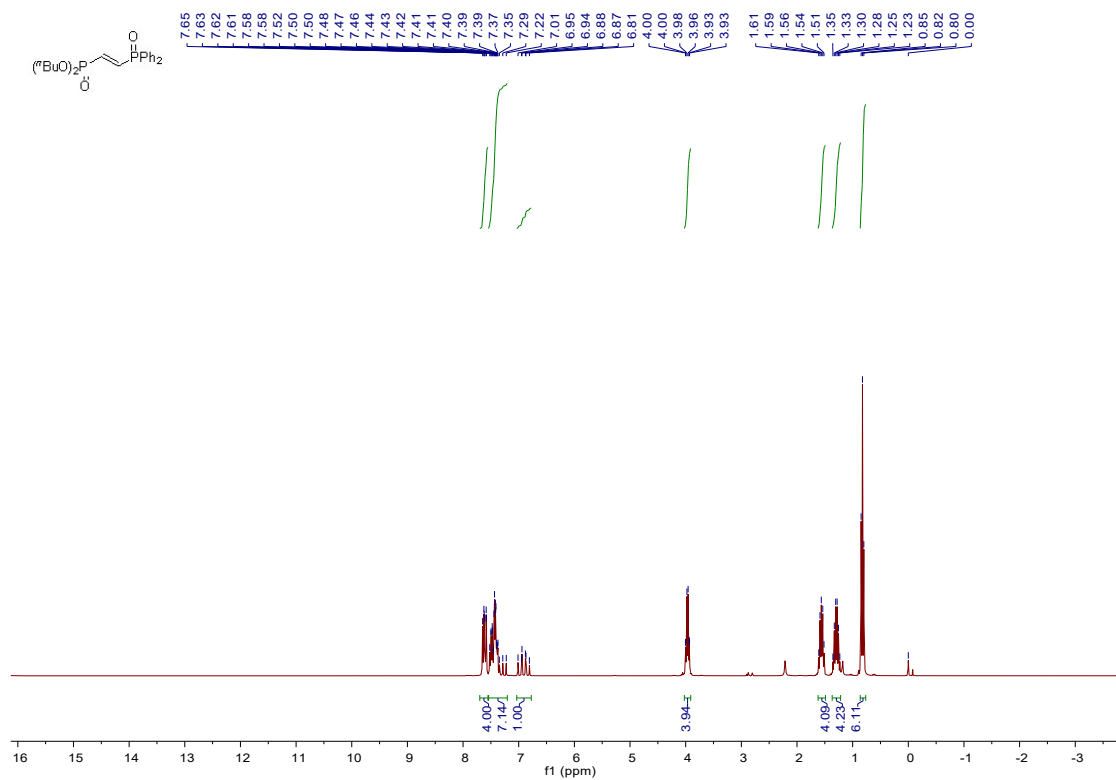

1H NMR of compound 3tk

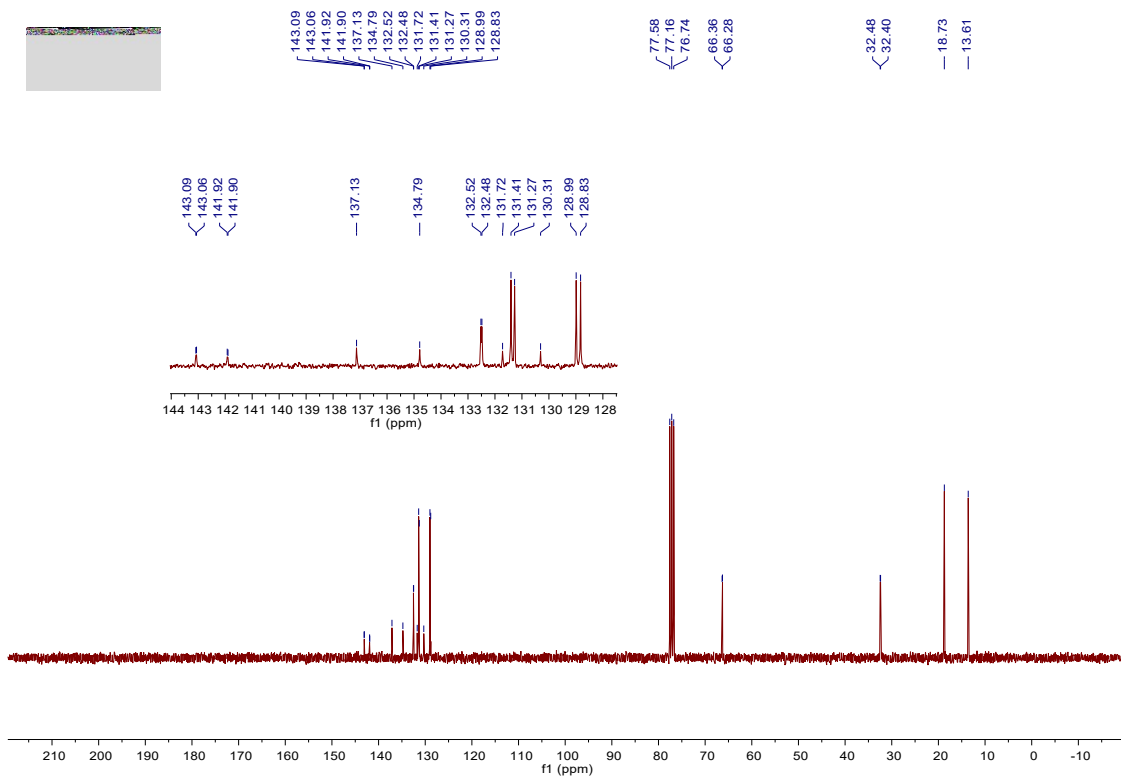

$^{13}\text{C}$  NMR of compound **3tk**

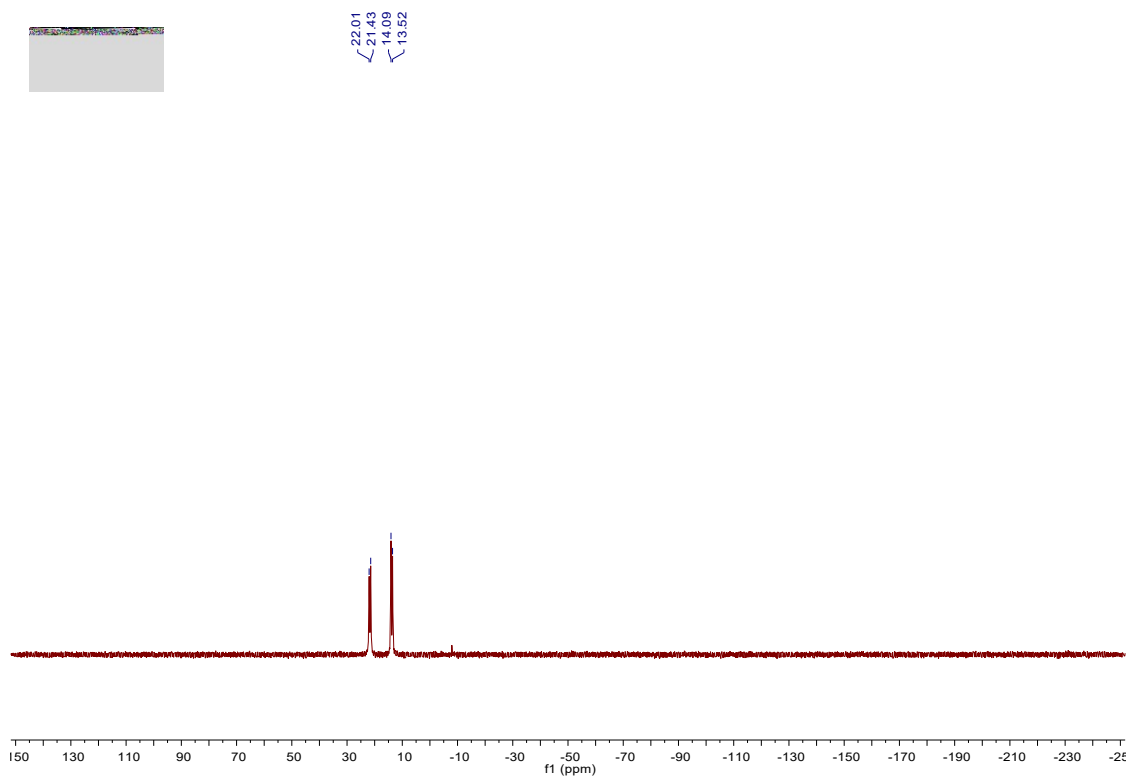

$^{31}\text{P}$  NMR of compound **3tk**

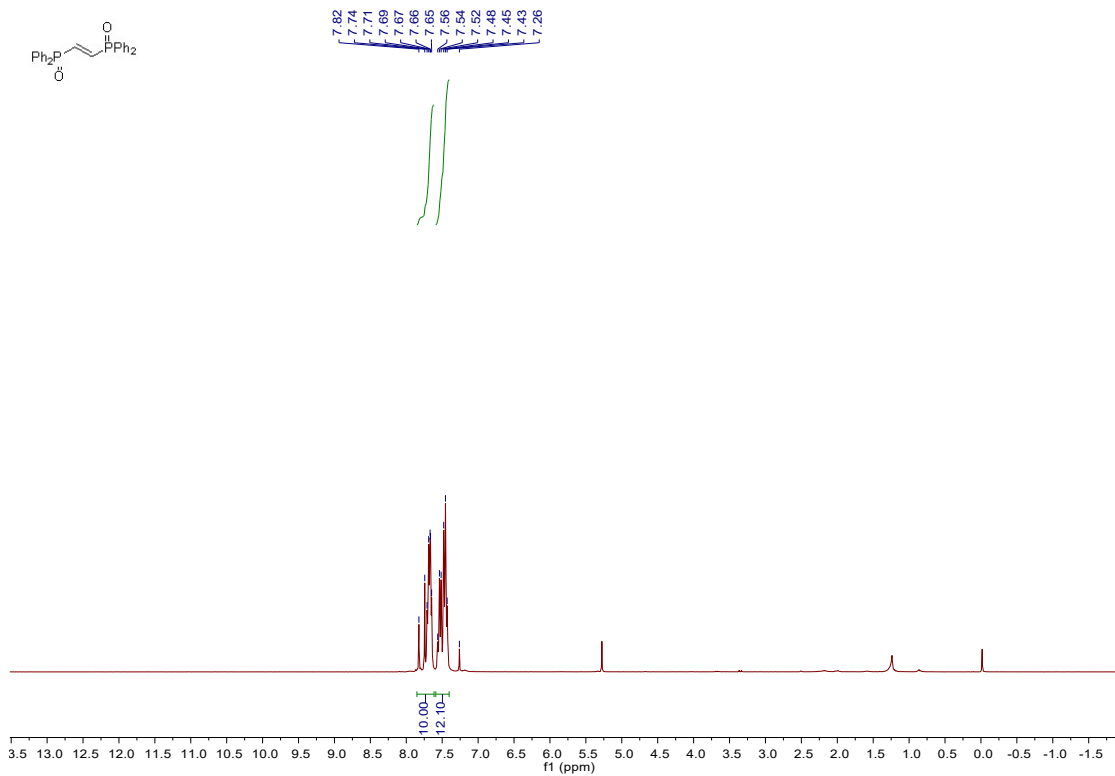

<sup>1</sup>H NMR of compound **3uk**

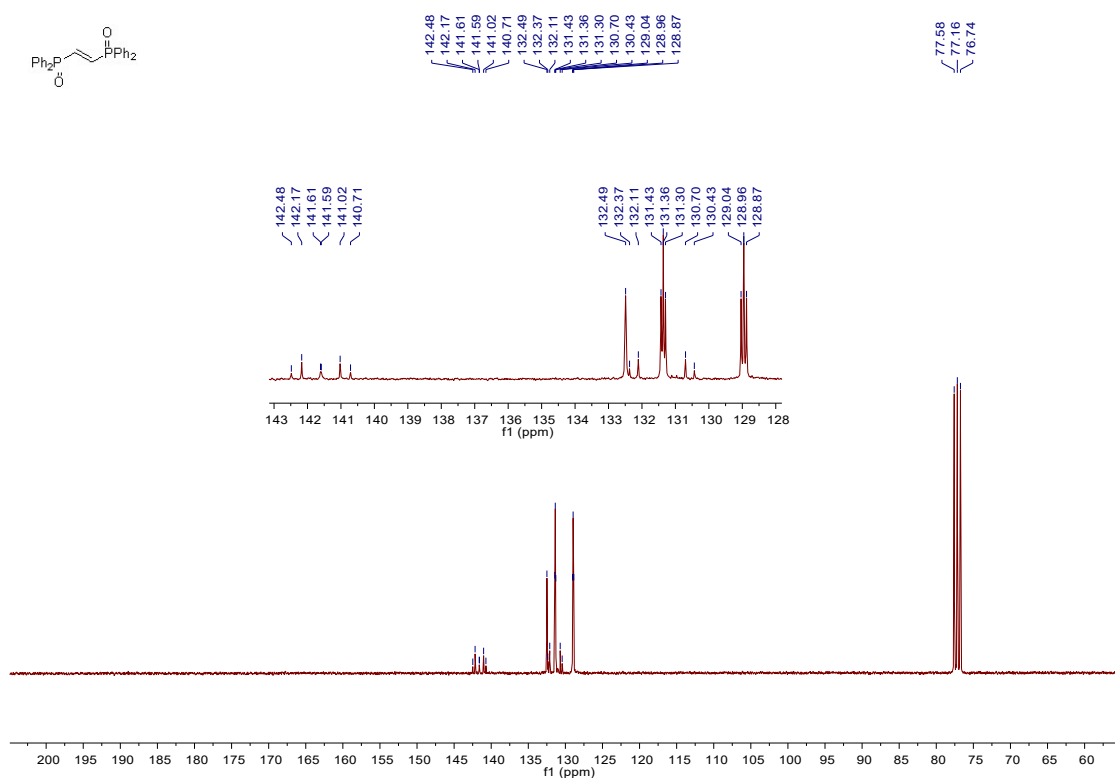

<sup>13</sup>C NMR of compound **3uk**

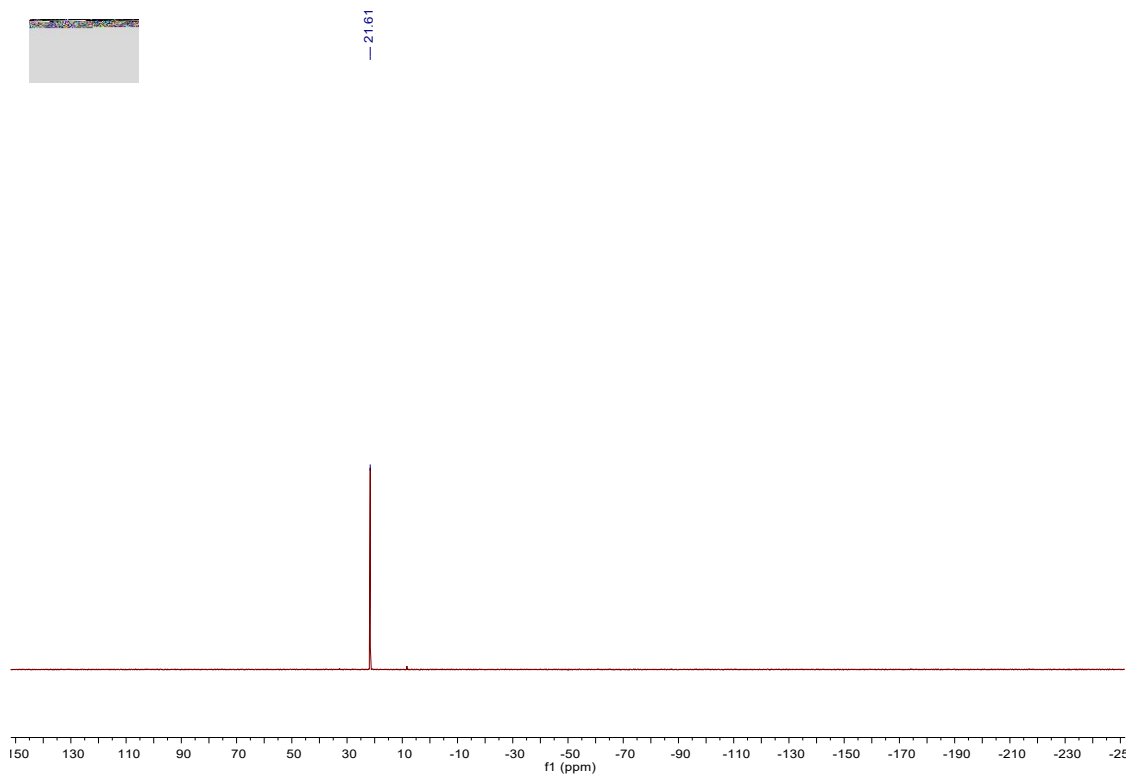

31P NMR of compound **3uk**

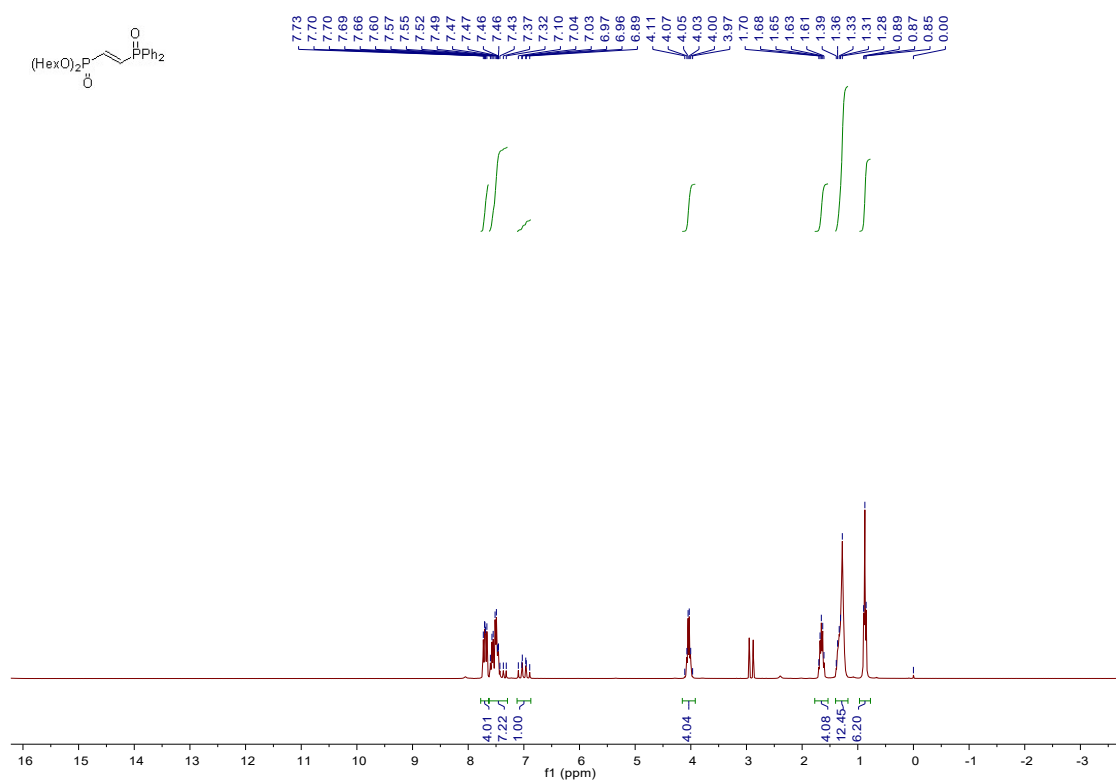

1H NMR of compound **3vk**

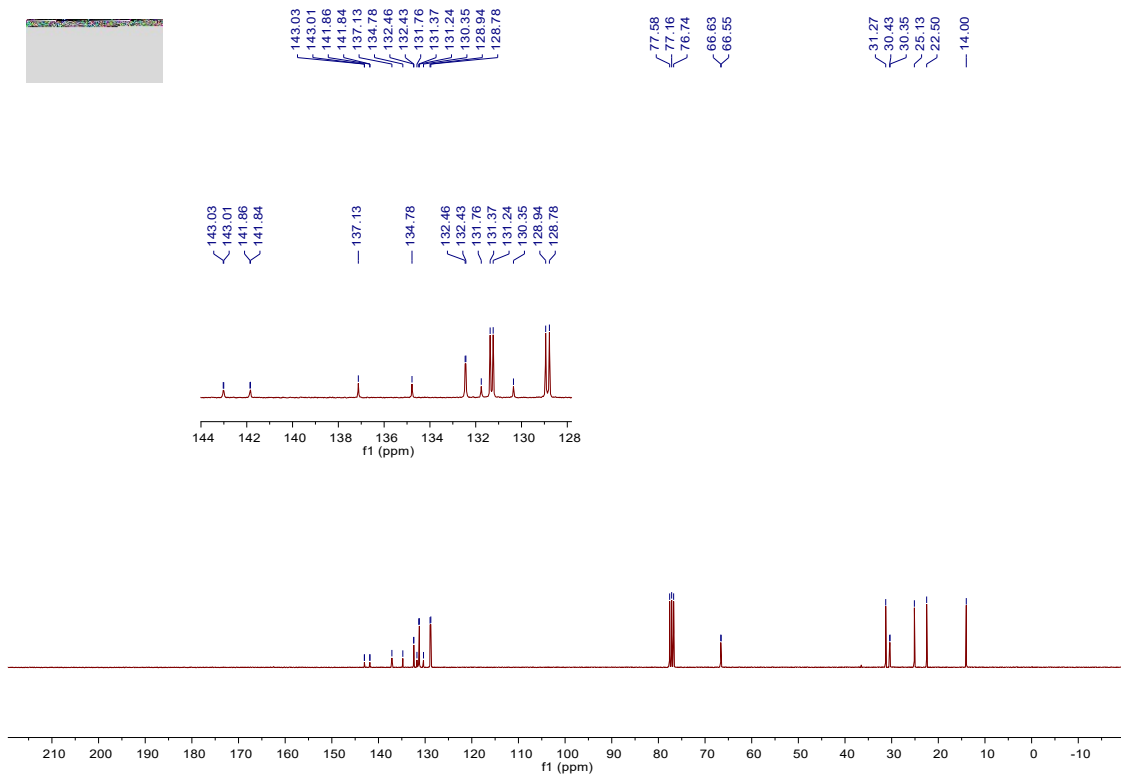

<sup>13</sup>C NMR of compound **3vk**

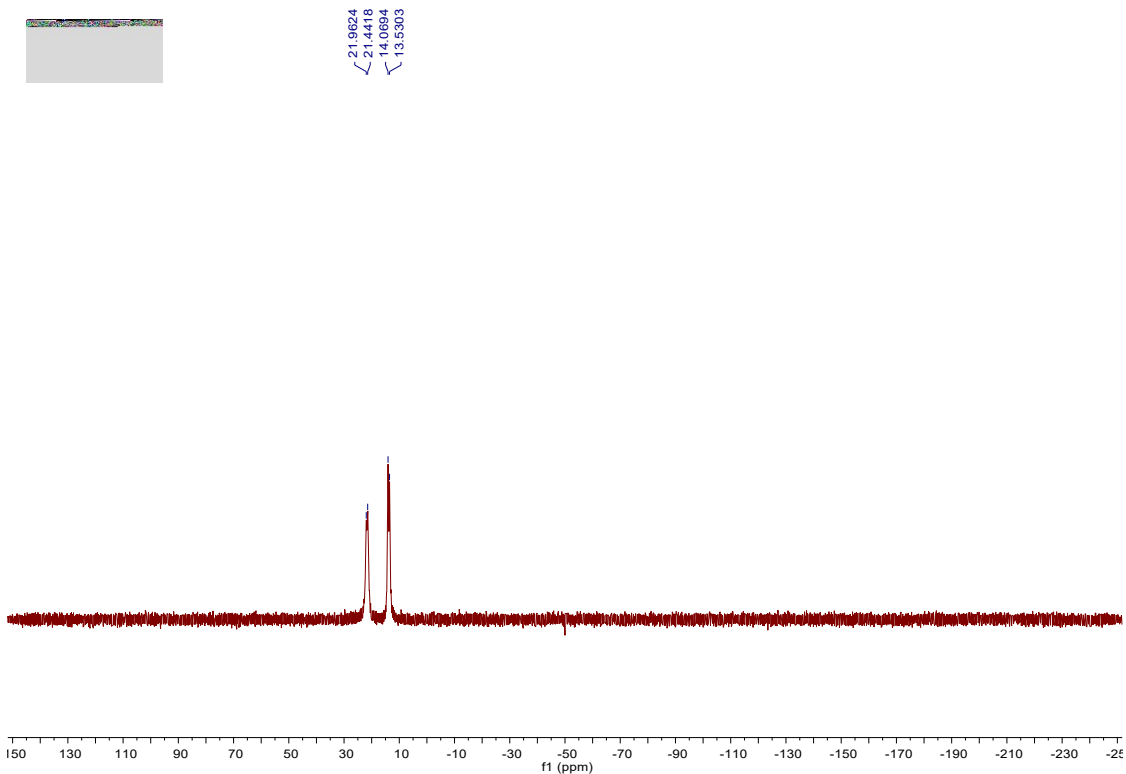

<sup>31</sup>P NMR of compound **3vk**

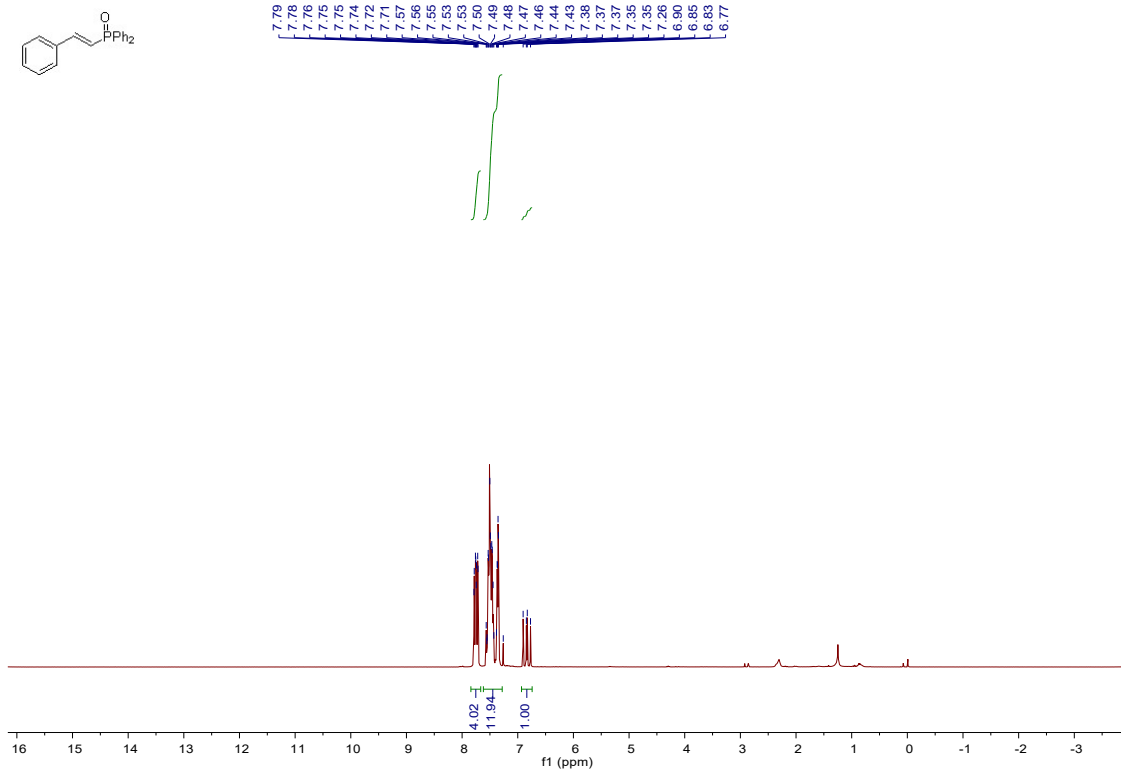

<sup>1</sup>H NMR of compound 5ak

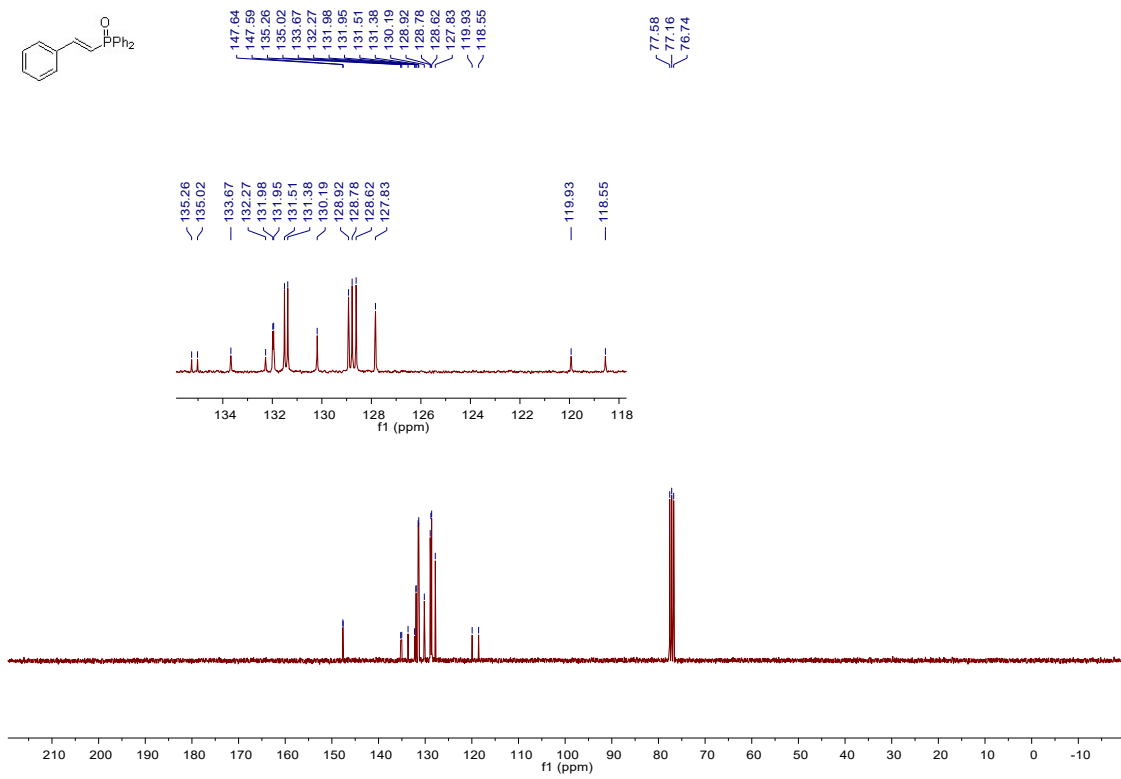

<sup>13</sup>C NMR of compound 5ak

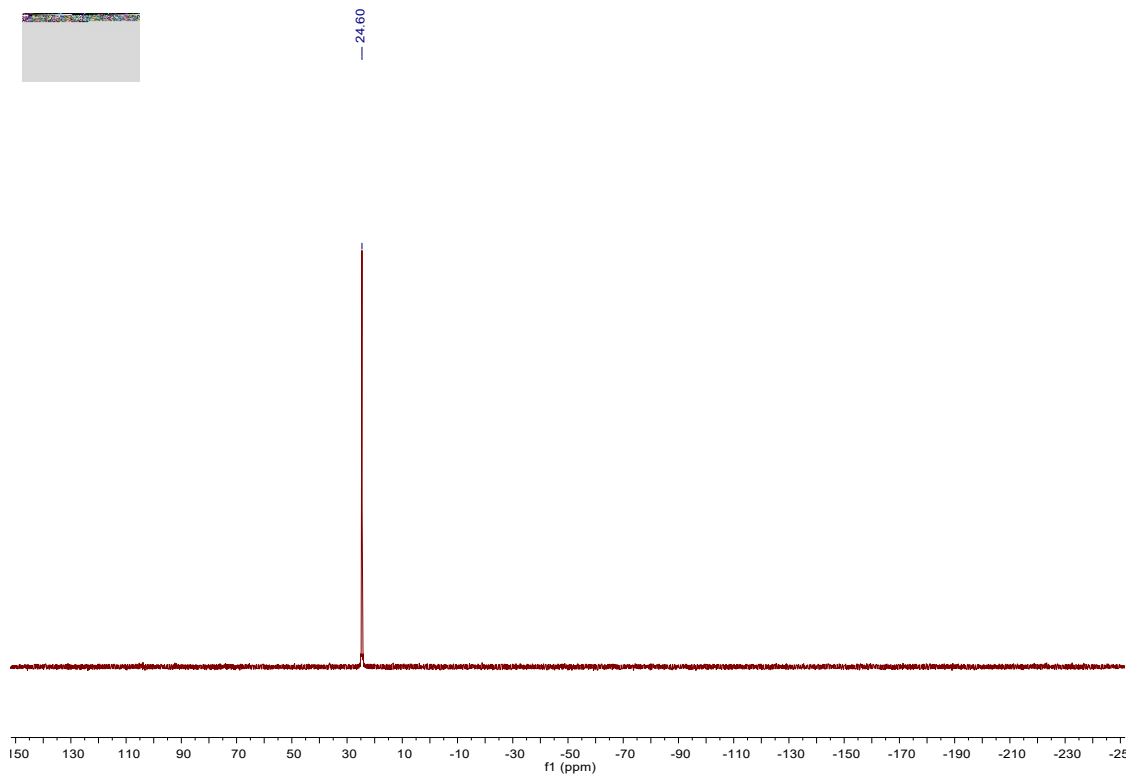

31P NMR of compound 5ak

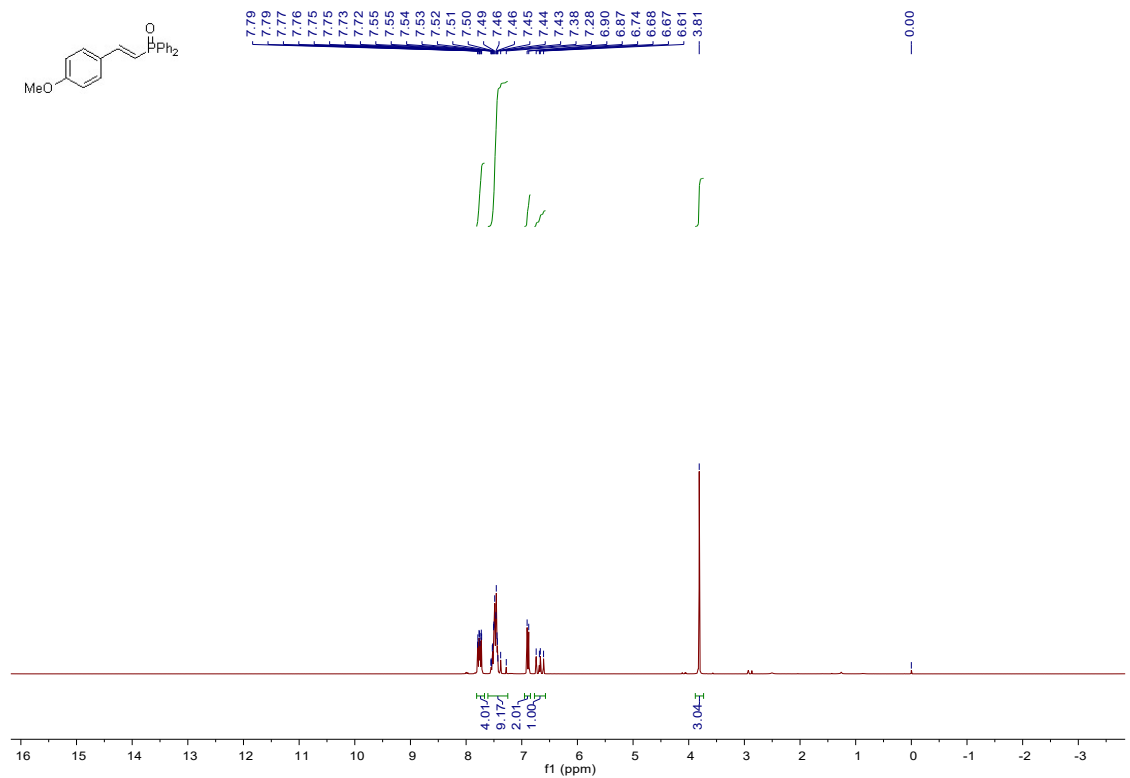

1H NMR of compound 5bk

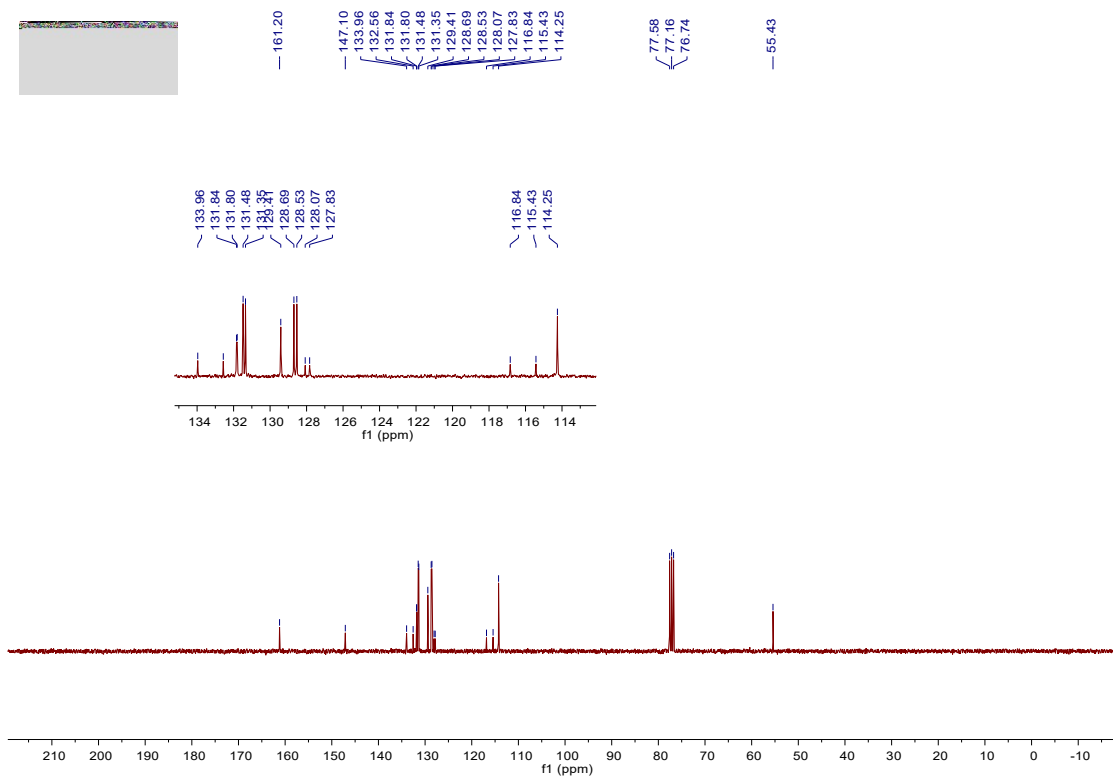

<sup>13</sup>C NMR of compound 5bk

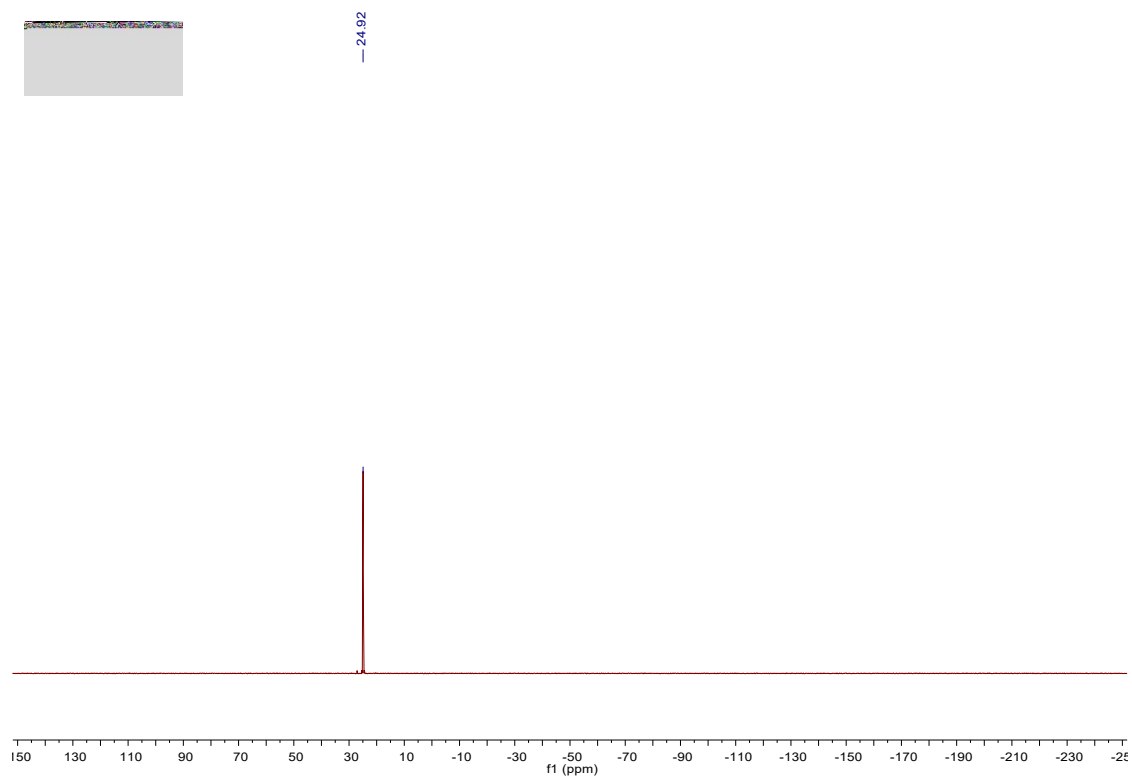

<sup>31</sup>P NMR of compound 5bk



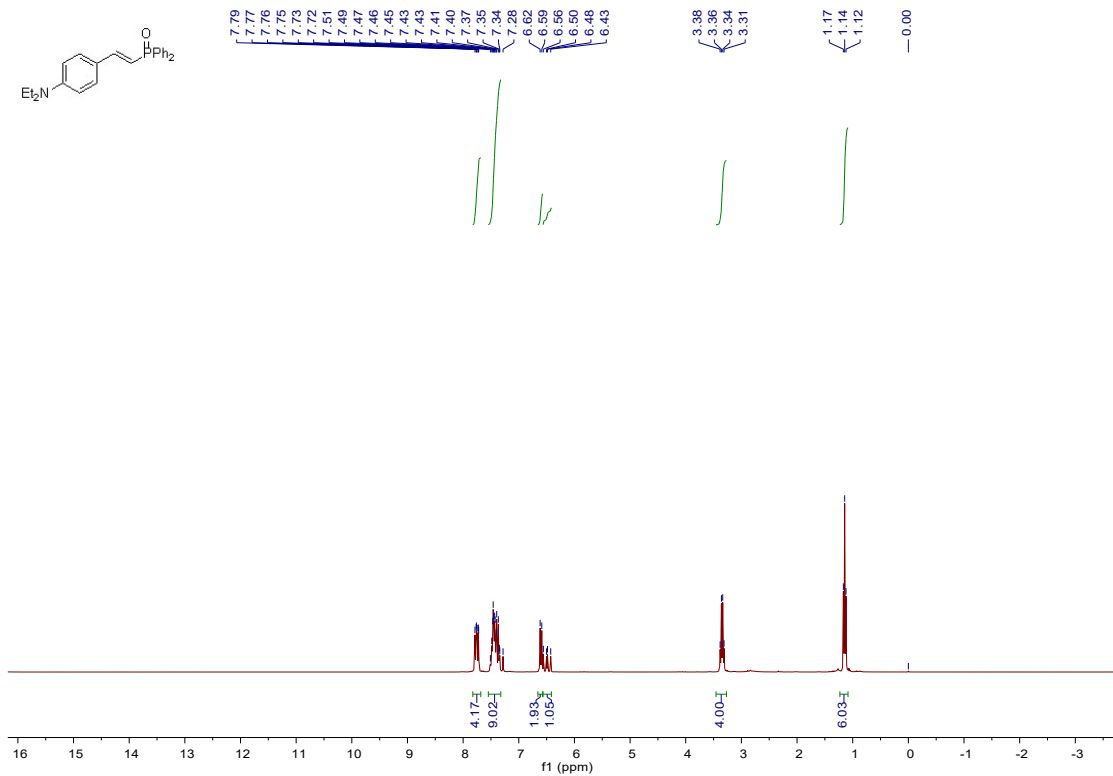

**<sup>1</sup>H NMR of compound 5ck**

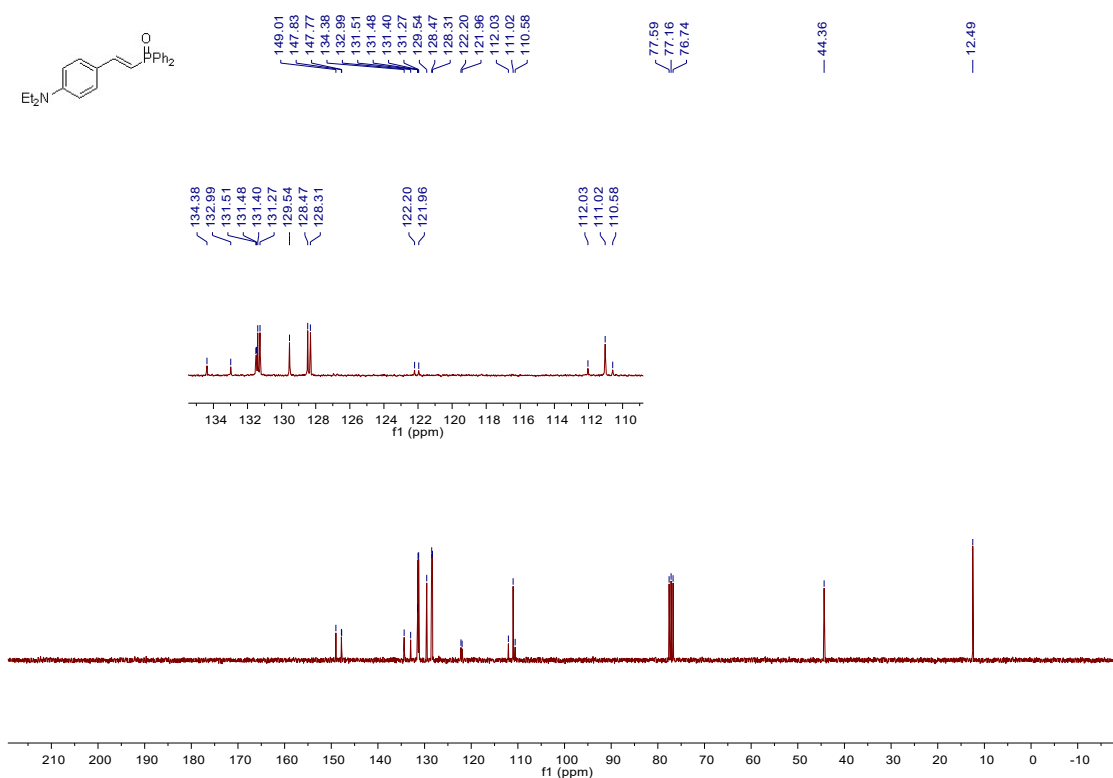

**<sup>13</sup>C NMR of compound 5ck**

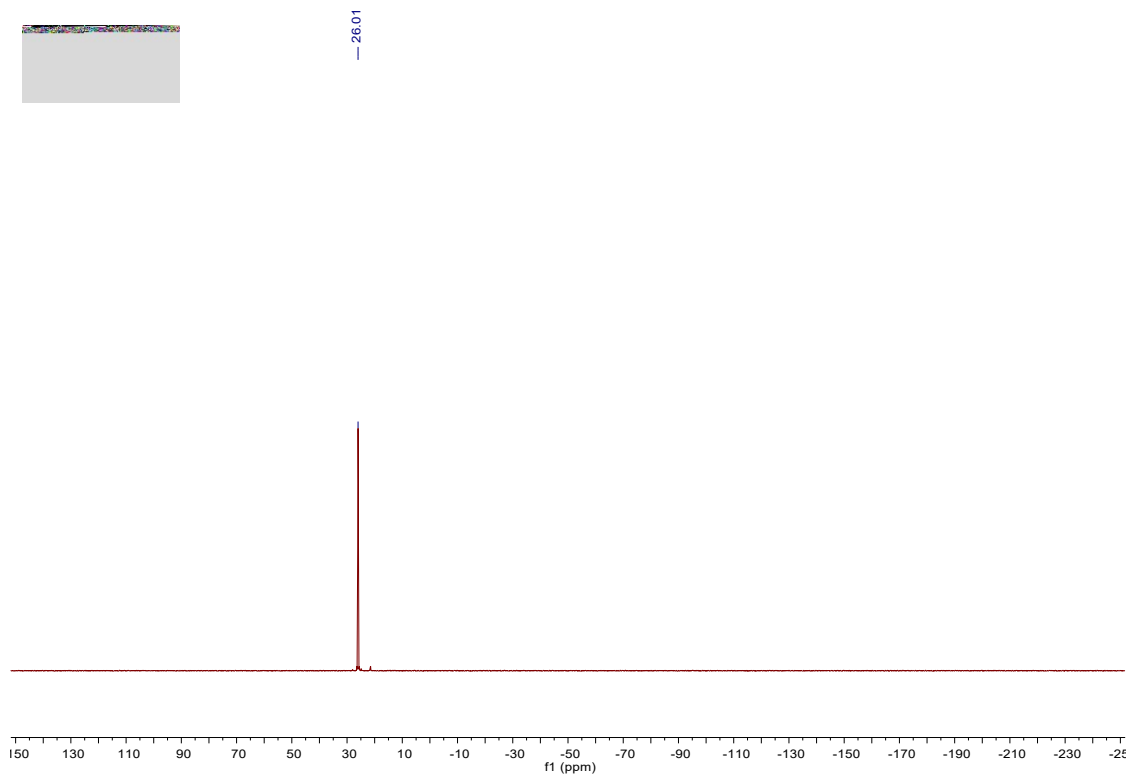

31P NMR of compound 5ck

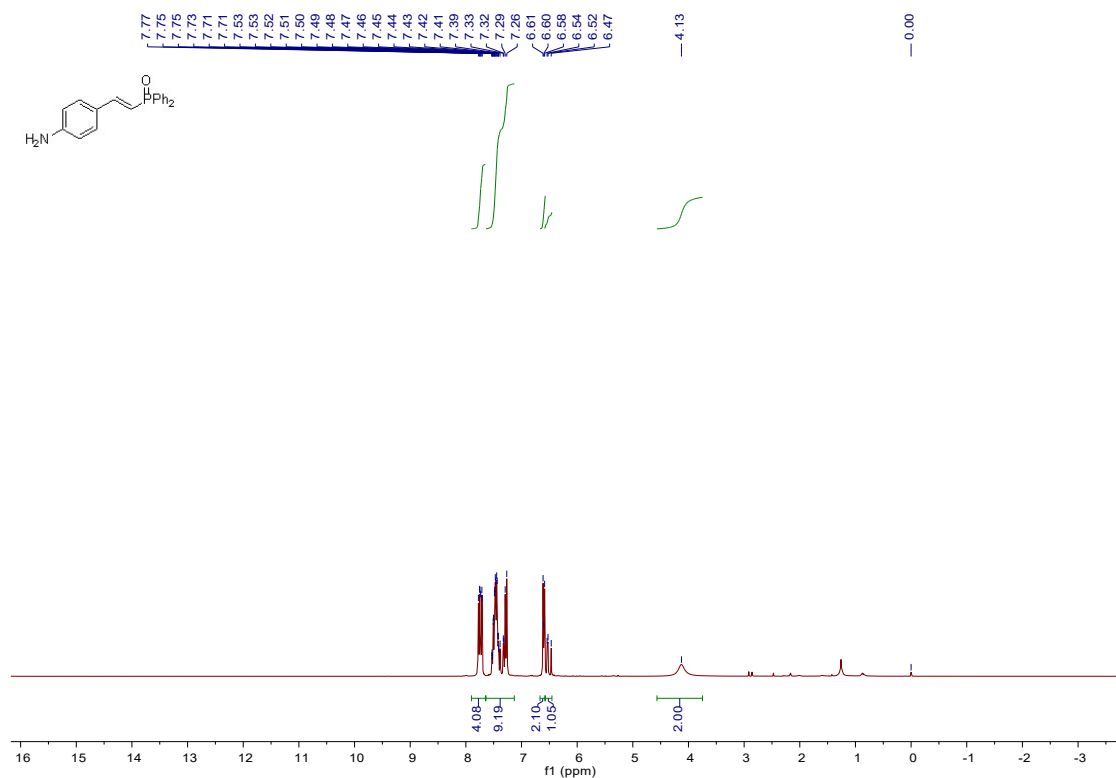

1H NMR of compound 5dk

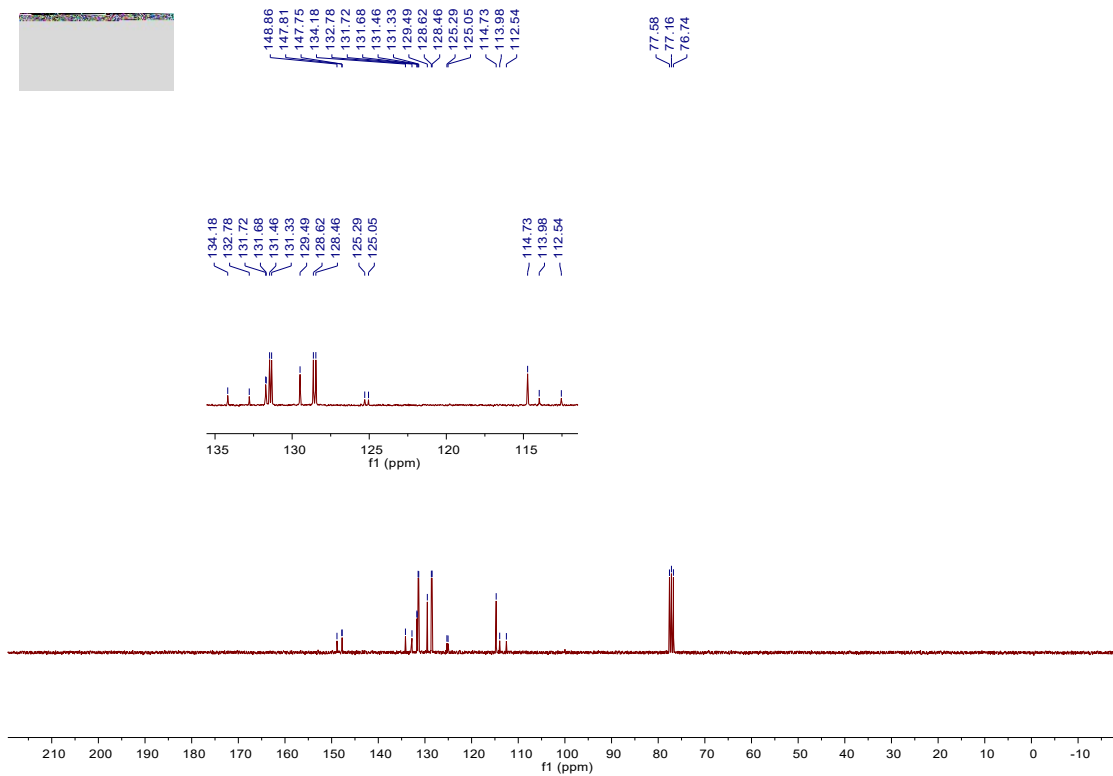

$^{13}\text{C}$  NMR of compound **5dk**

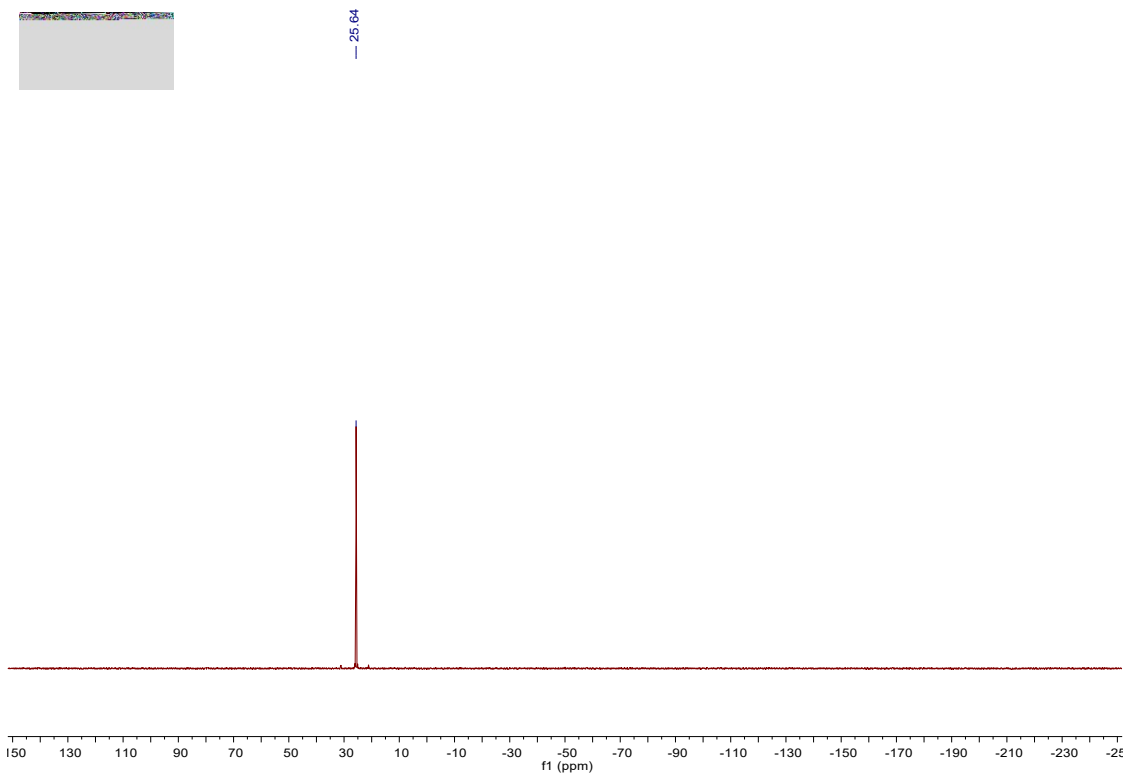

$^{31}\text{P}$  NMR of compound **5dk**

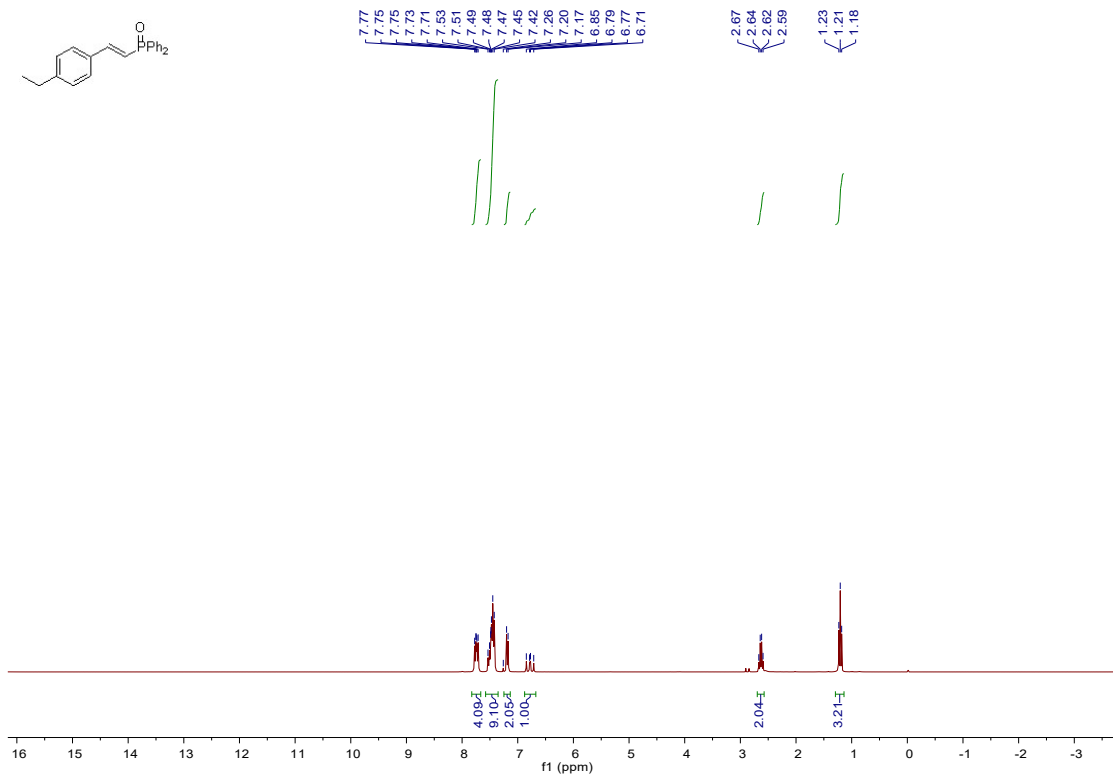

**<sup>1</sup>H NMR of compound 5ek**

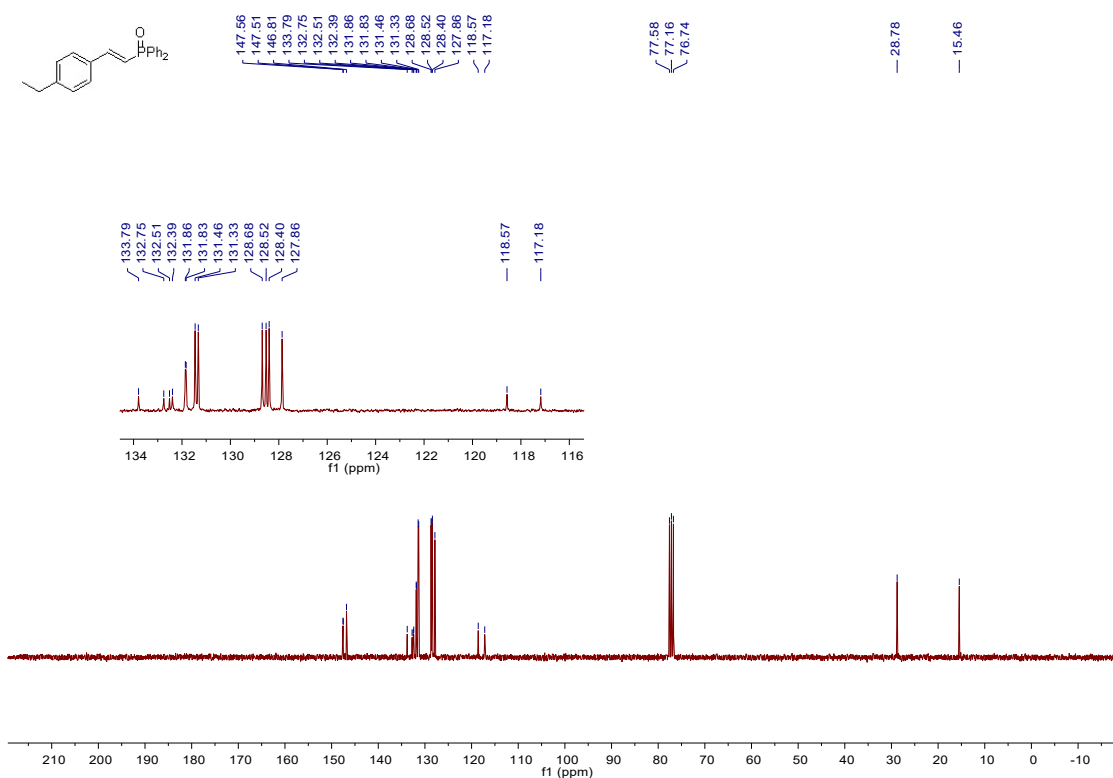

**<sup>13</sup>C NMR of compound 5ek**

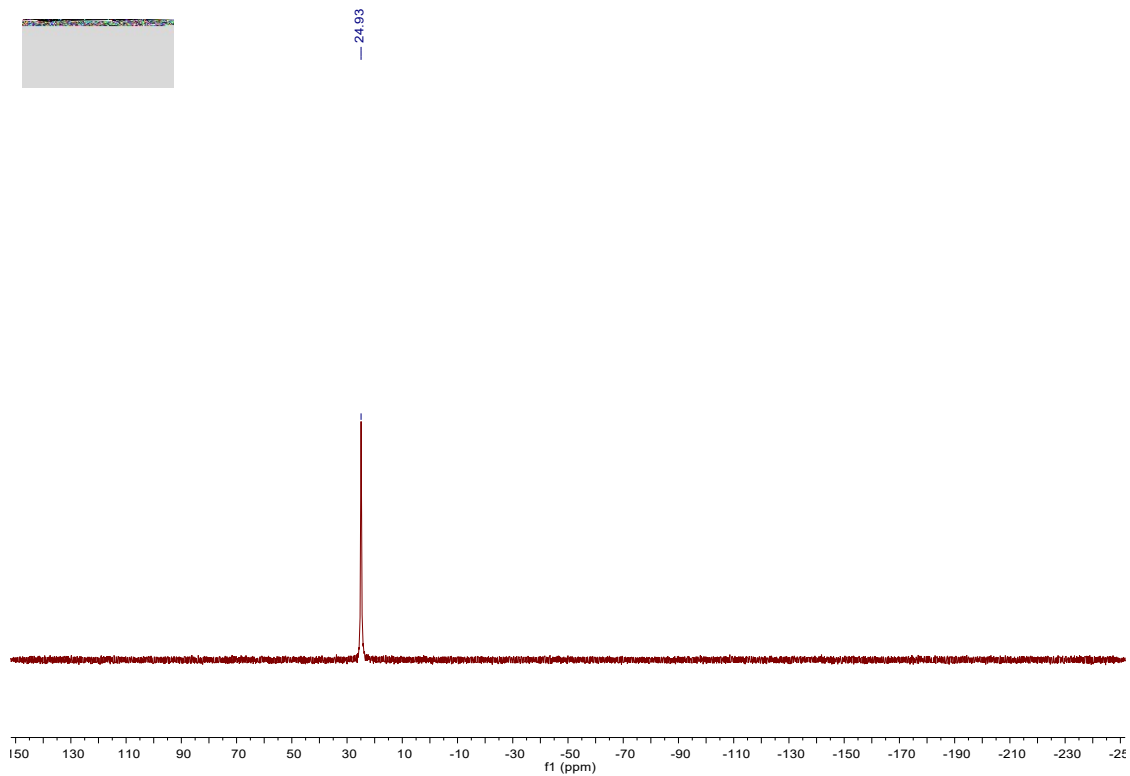

31P NMR of compound 5ek

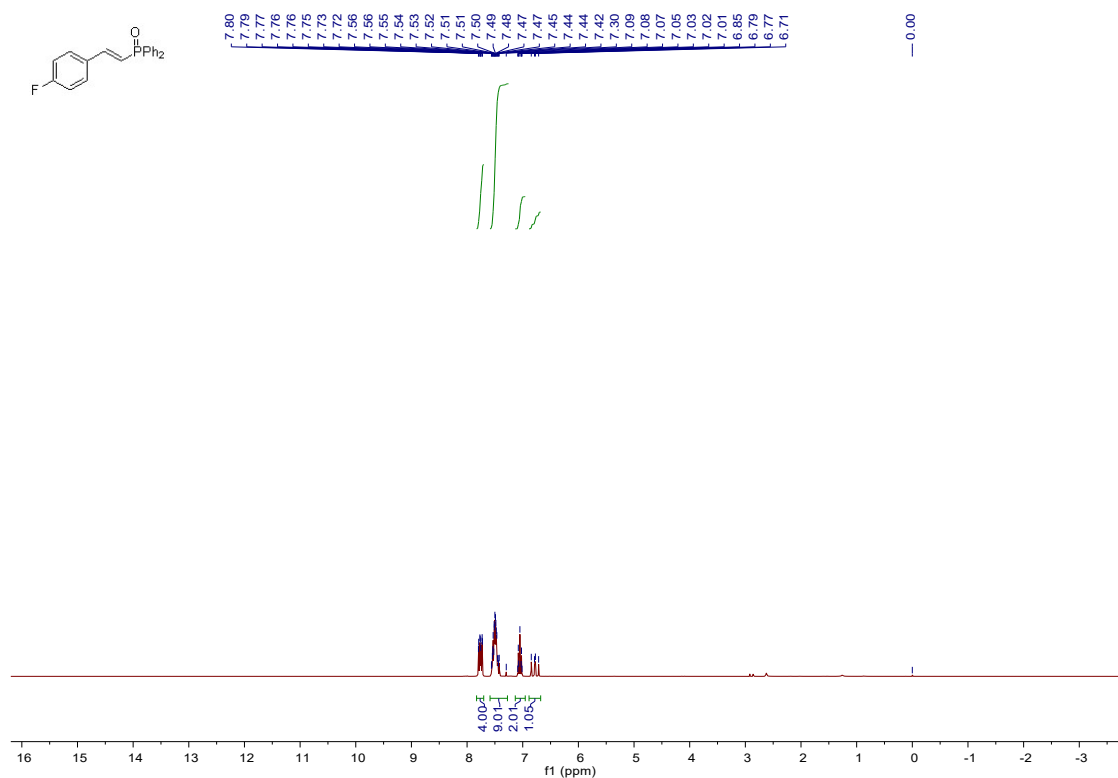

1H NMR of compound 5fk

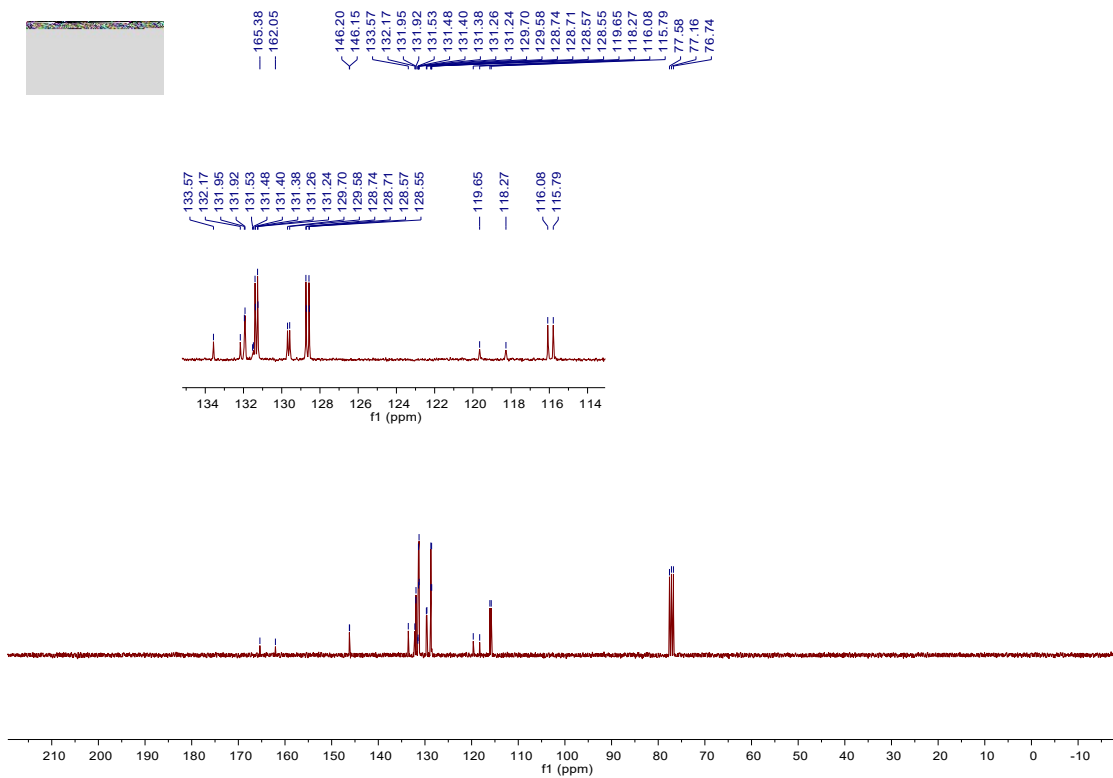

<sup>13</sup>C NMR of compound 5fk

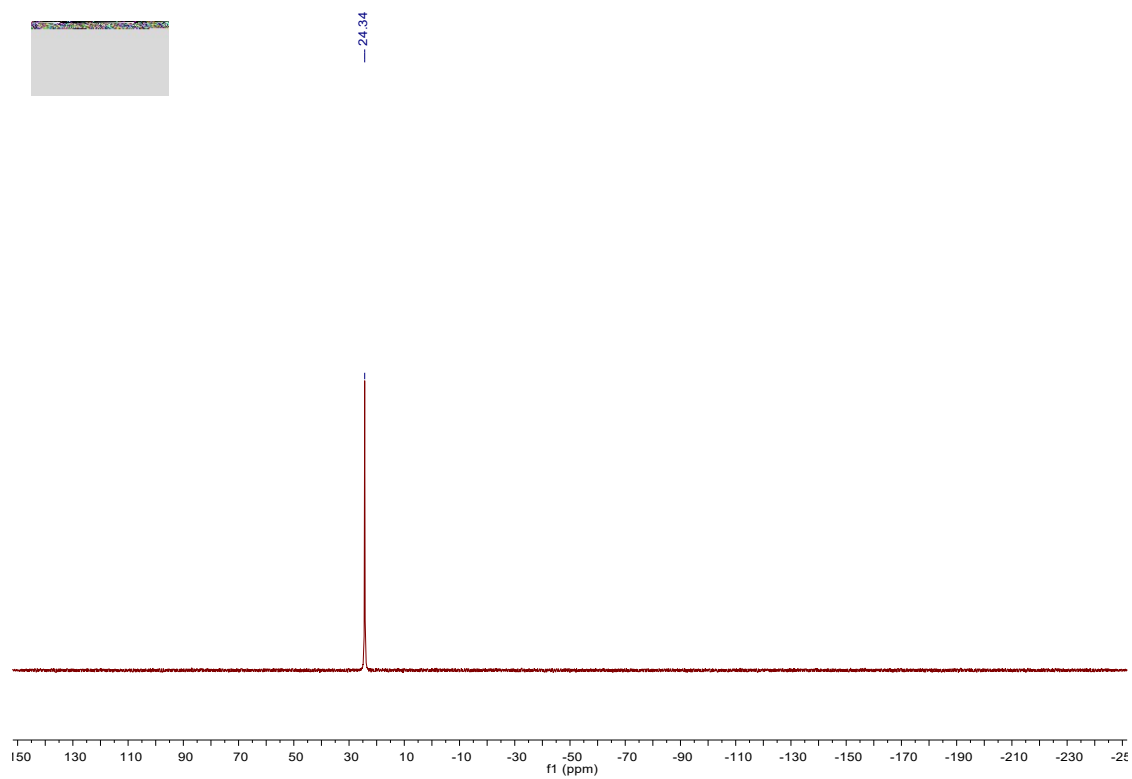

<sup>31</sup>P NMR of compound 5fk

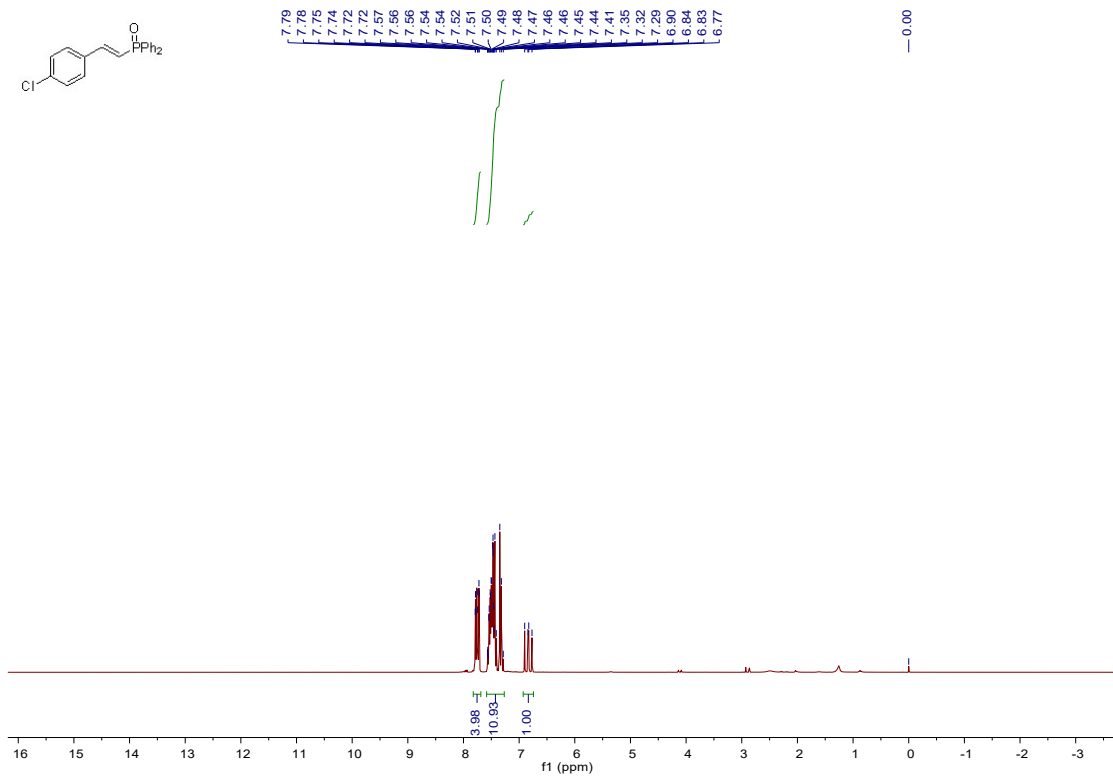

<sup>1</sup>H NMR of compound 5gk

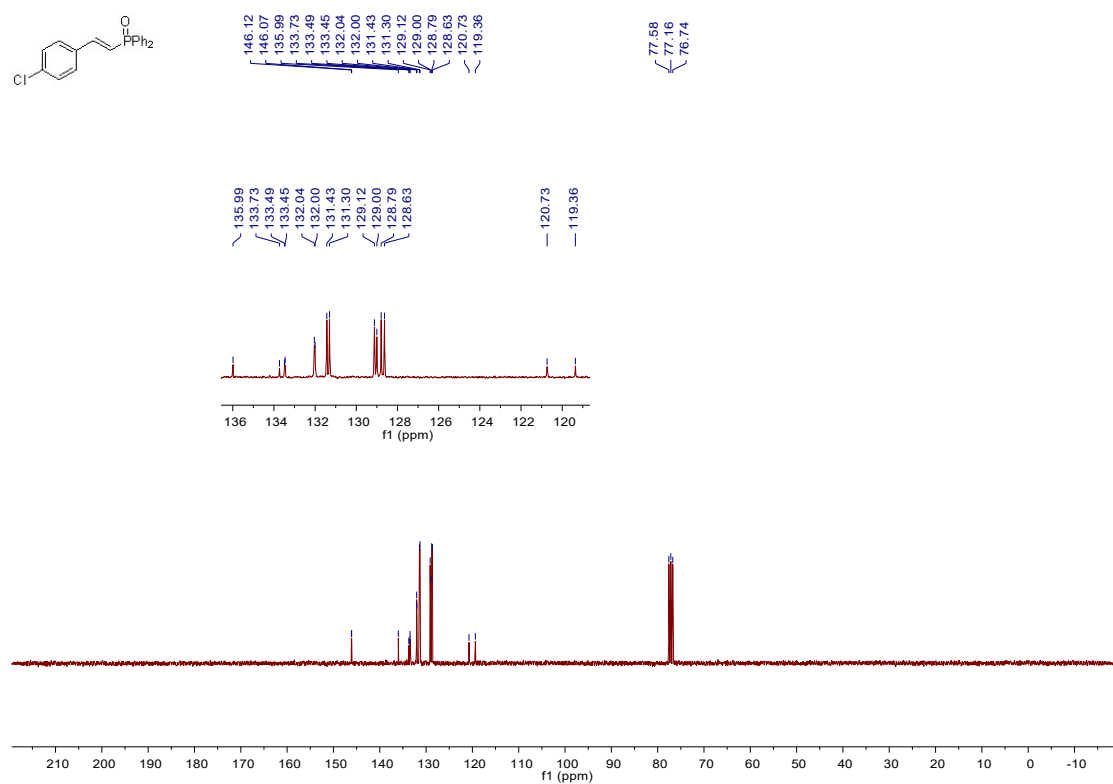

<sup>13</sup>C NMR of compound 5gk

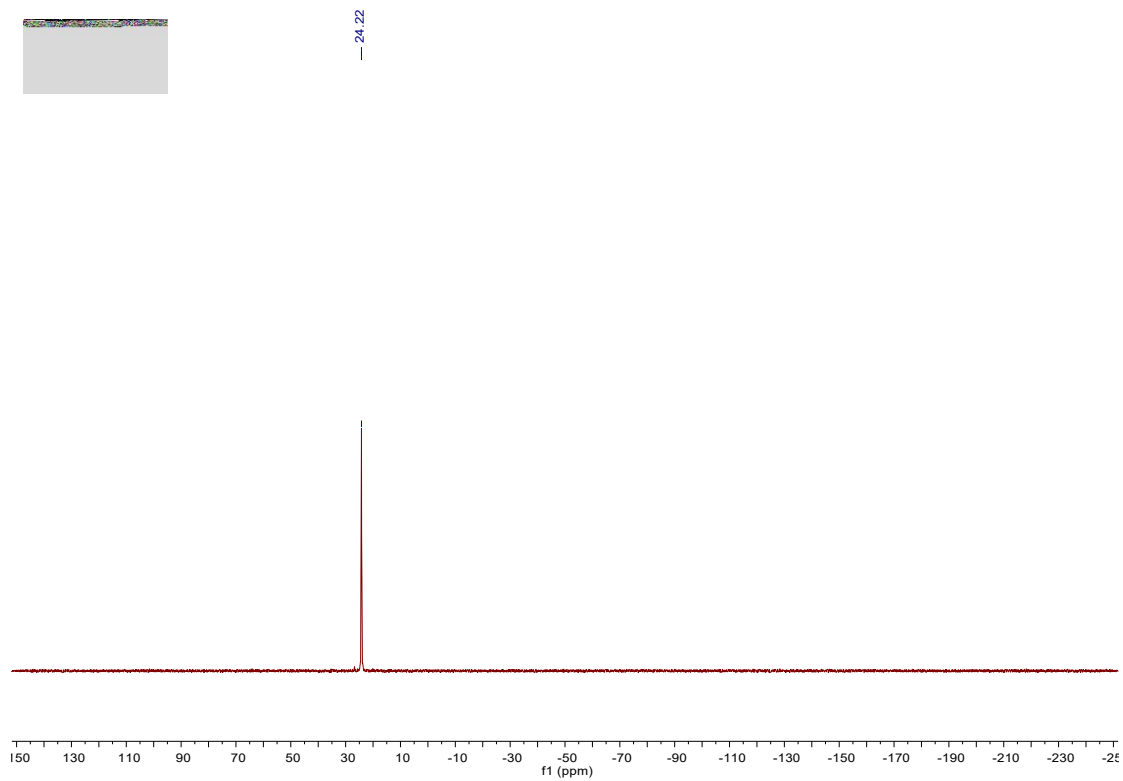

<sup>31</sup>P NMR of compound 5gk

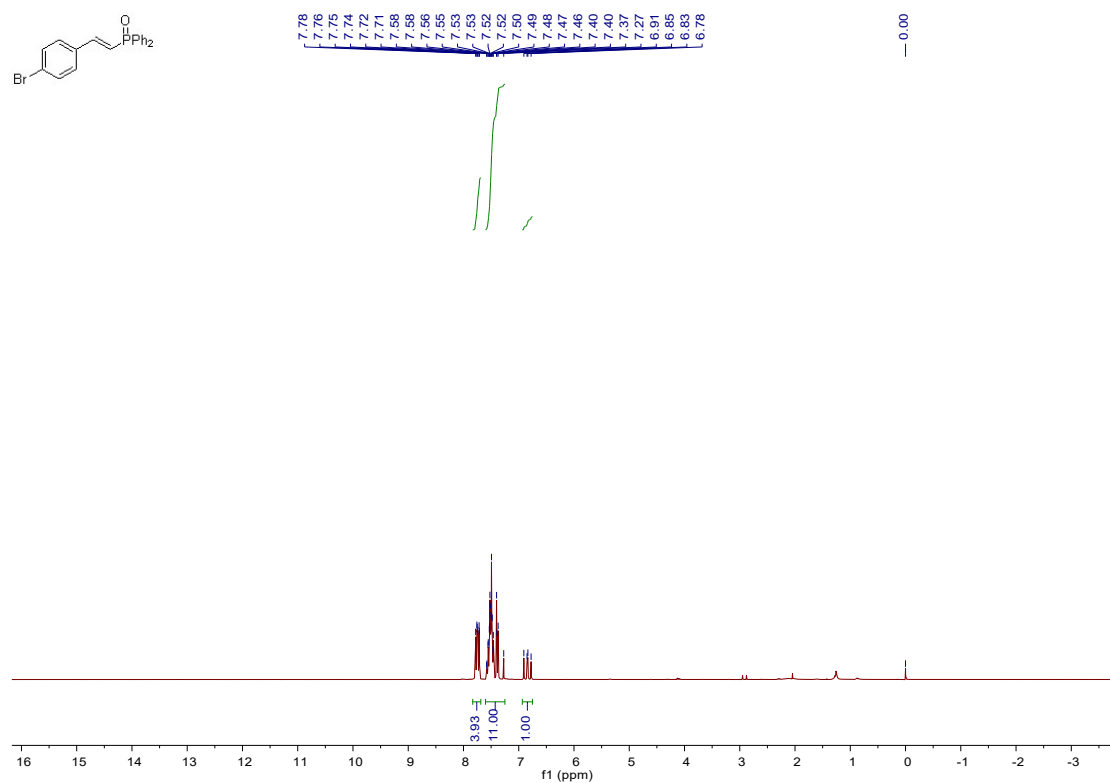

<sup>1</sup>H NMR of compound 5hk



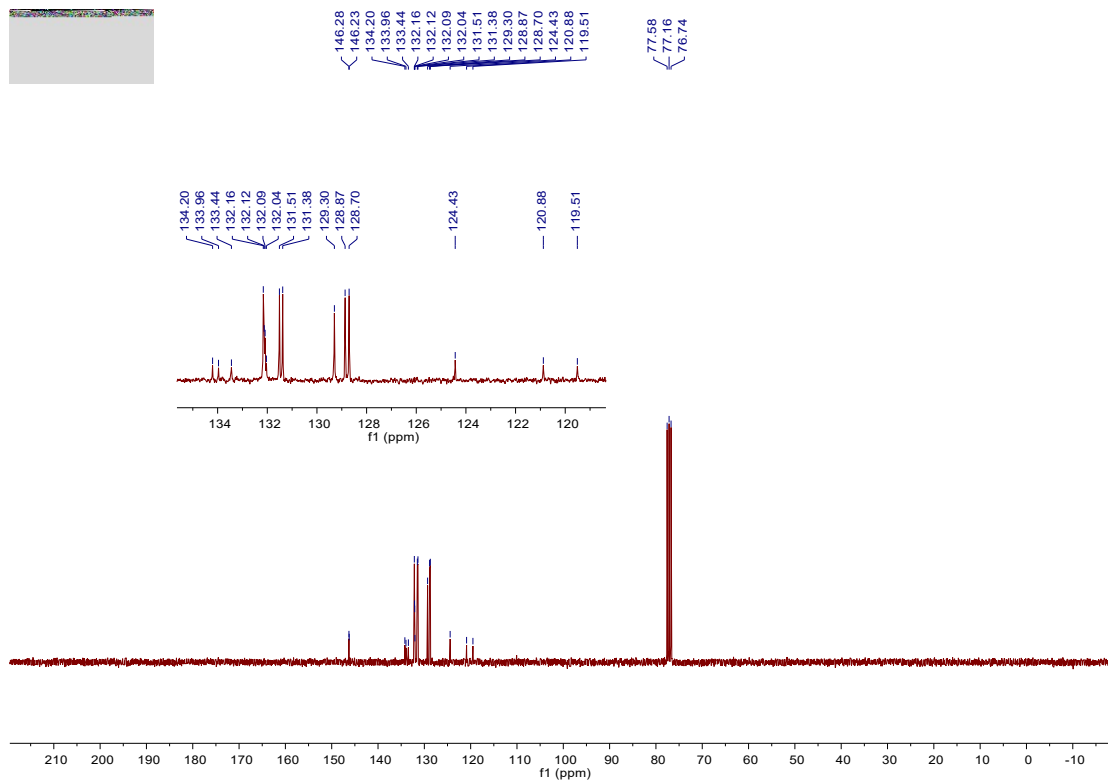

$^{13}\text{C}$  NMR of compound **5hk**

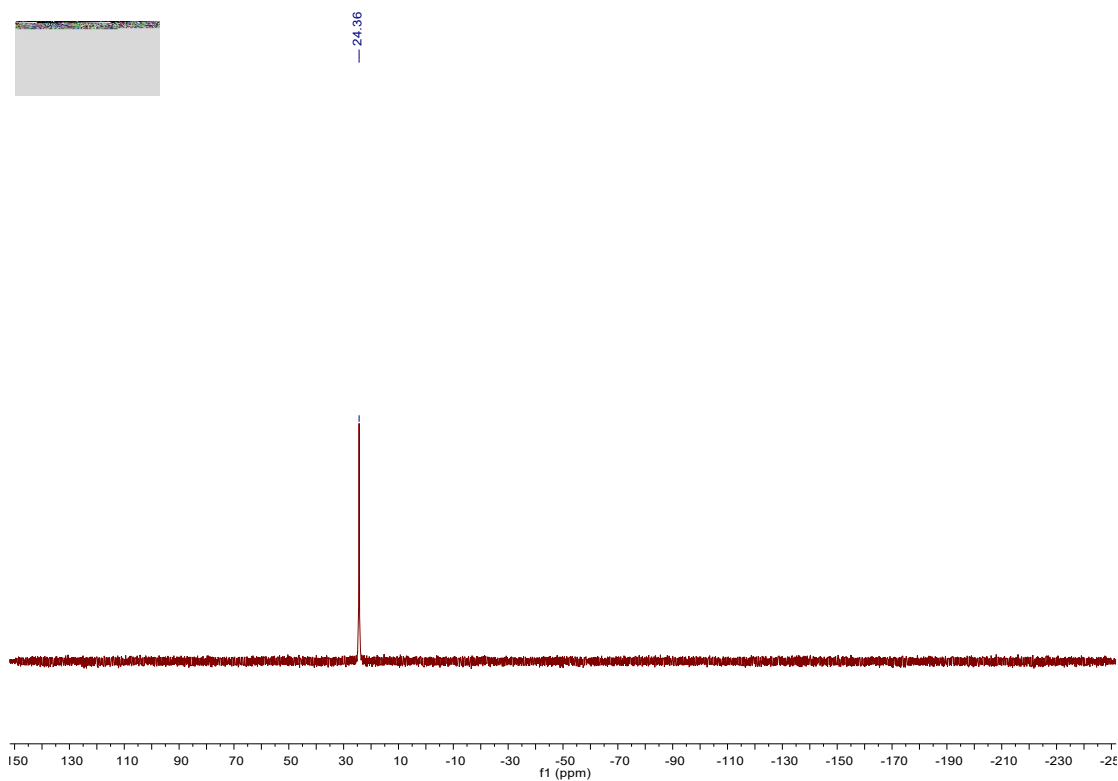

$^{31}\text{P}$  NMR of compound **5hk**

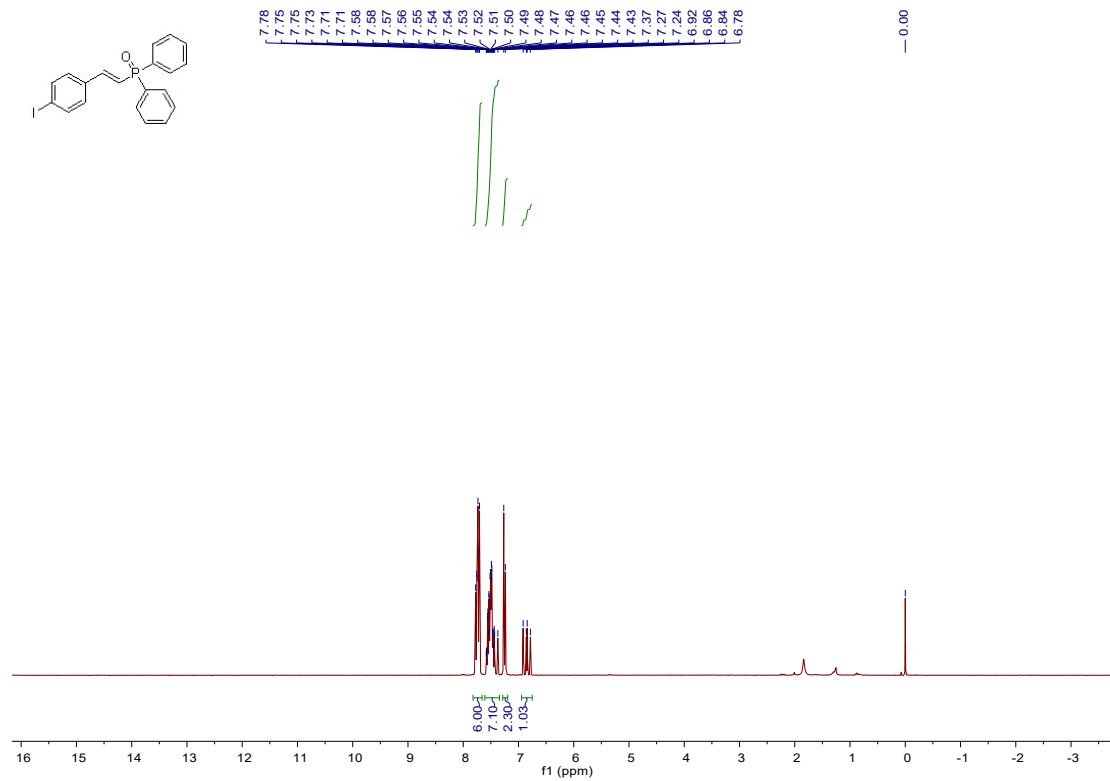

**<sup>1</sup>H NMR of compound 5ik**

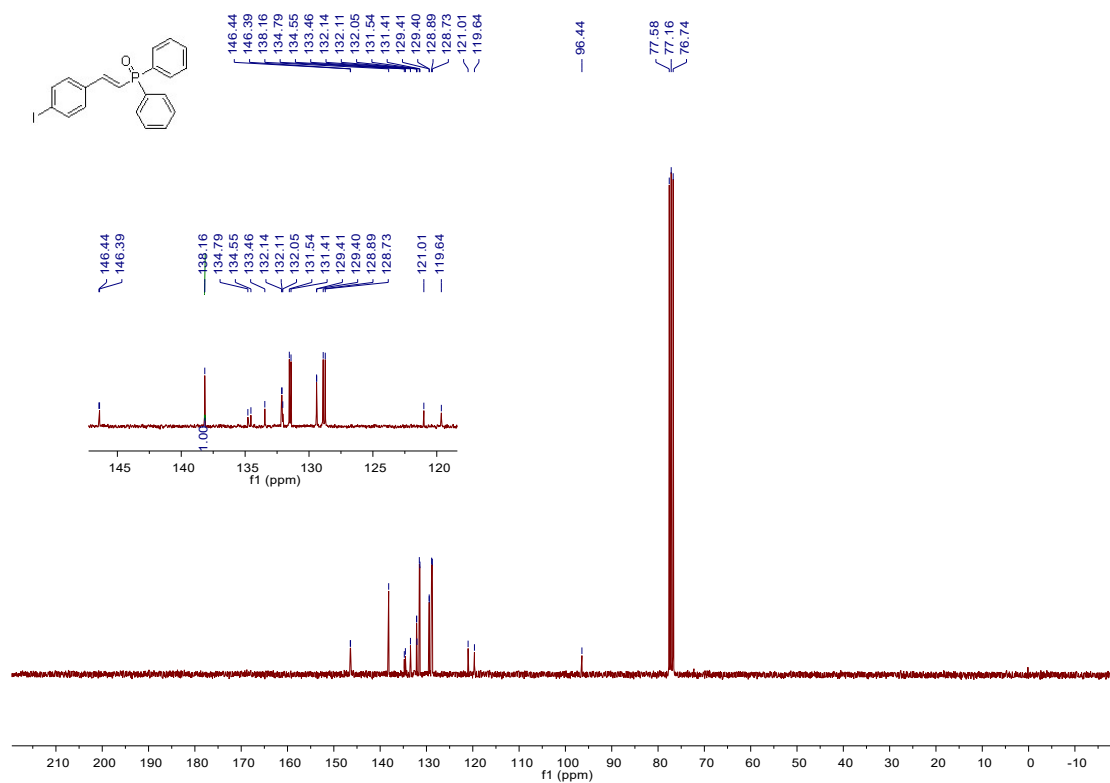

**<sup>13</sup>C NMR of compound 5ik**

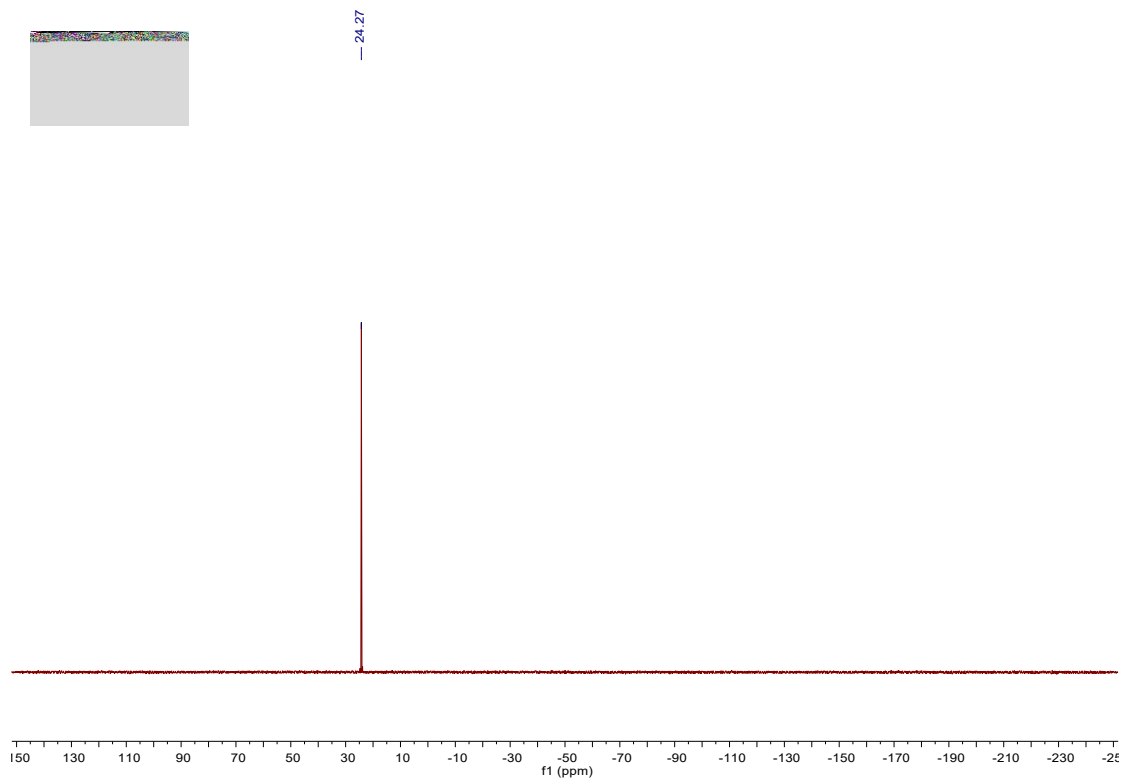

<sup>31</sup>P NMR of compound 5ik

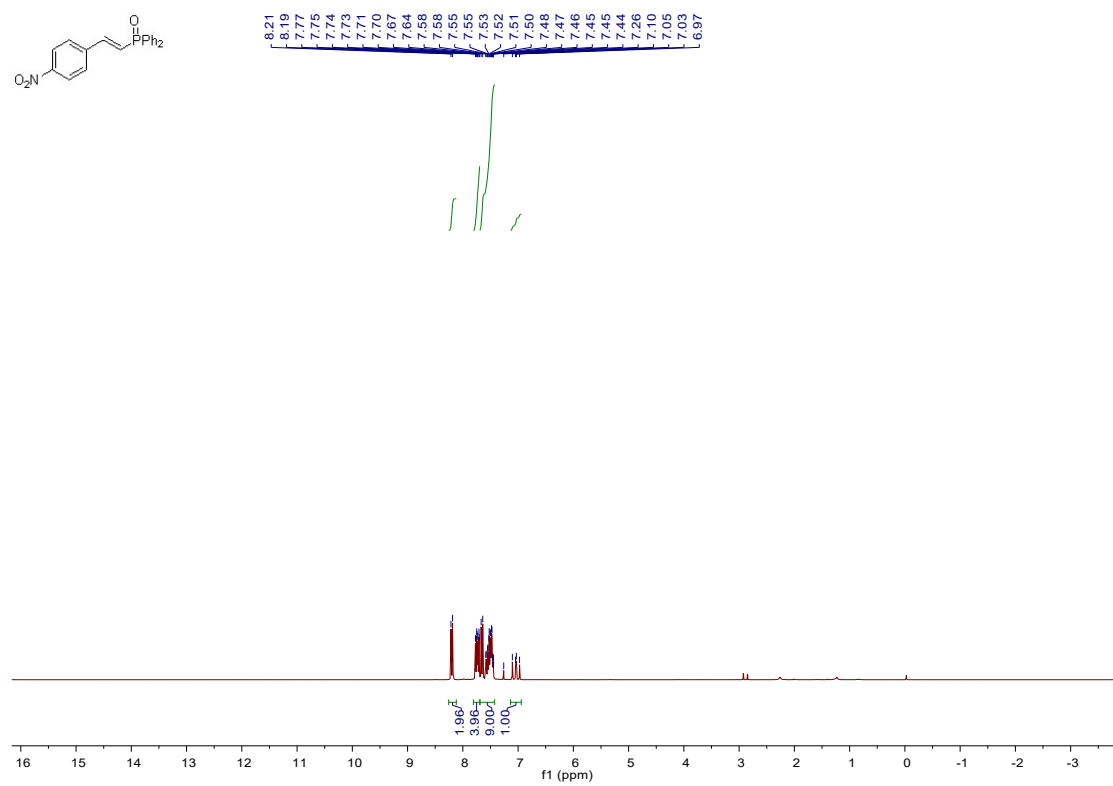

<sup>1</sup>H NMR of compound 5jk

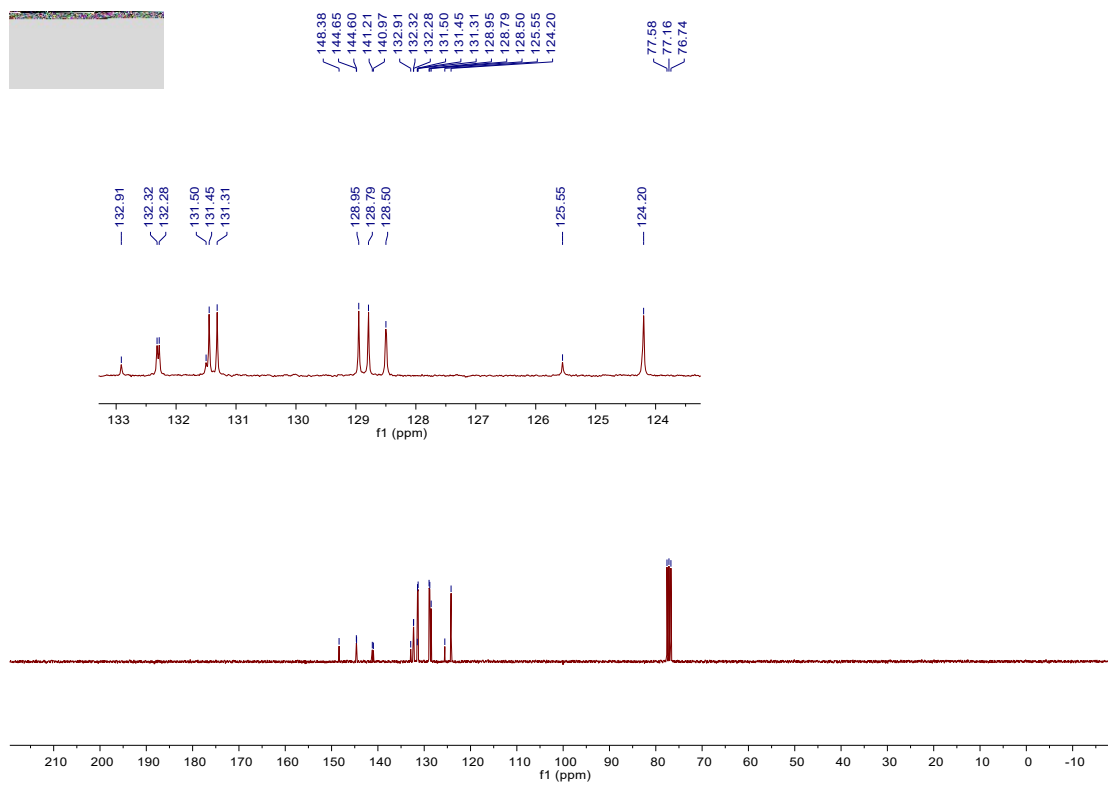

<sup>13</sup>C NMR of compound 5jk

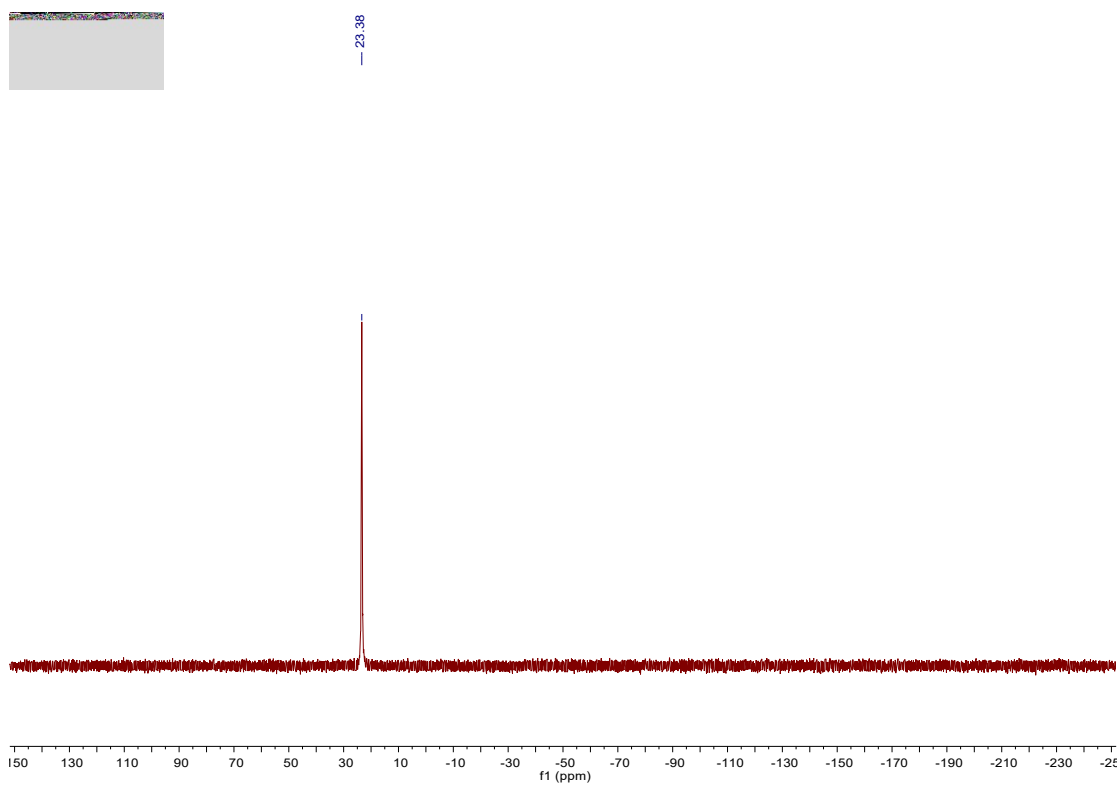

<sup>31</sup>P NMR of compound 5jk

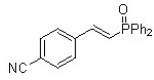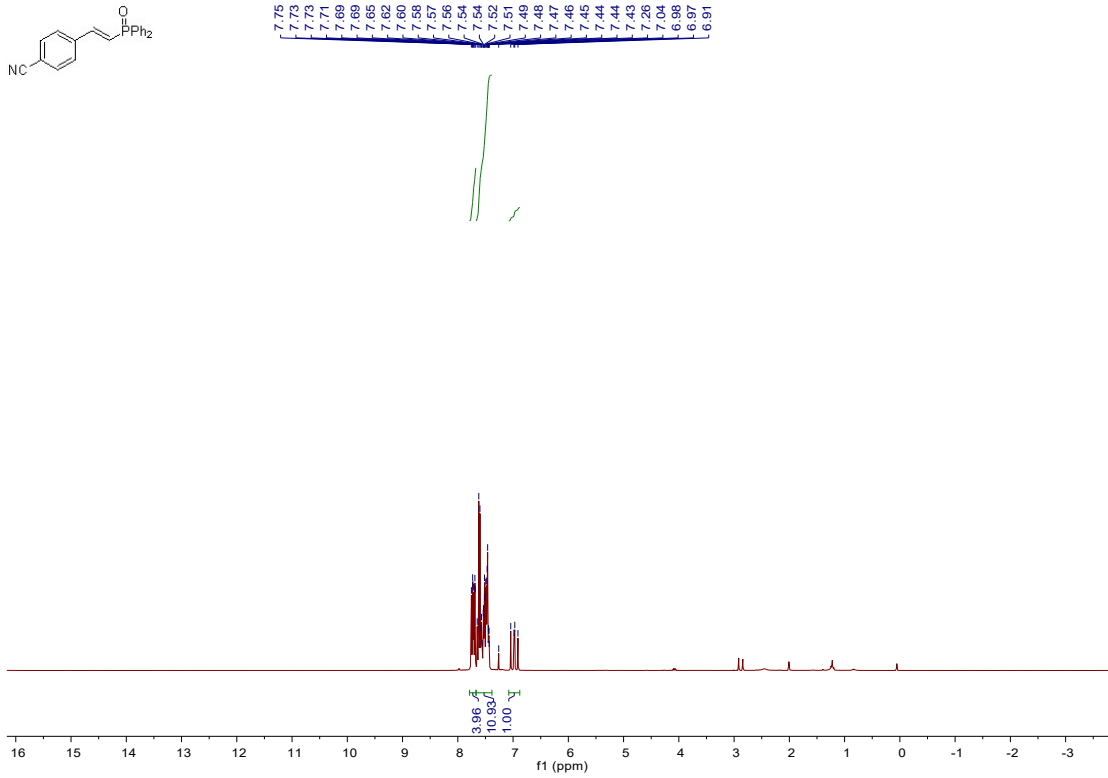

<sup>1</sup>H NMR of compound 5kk

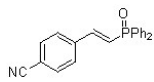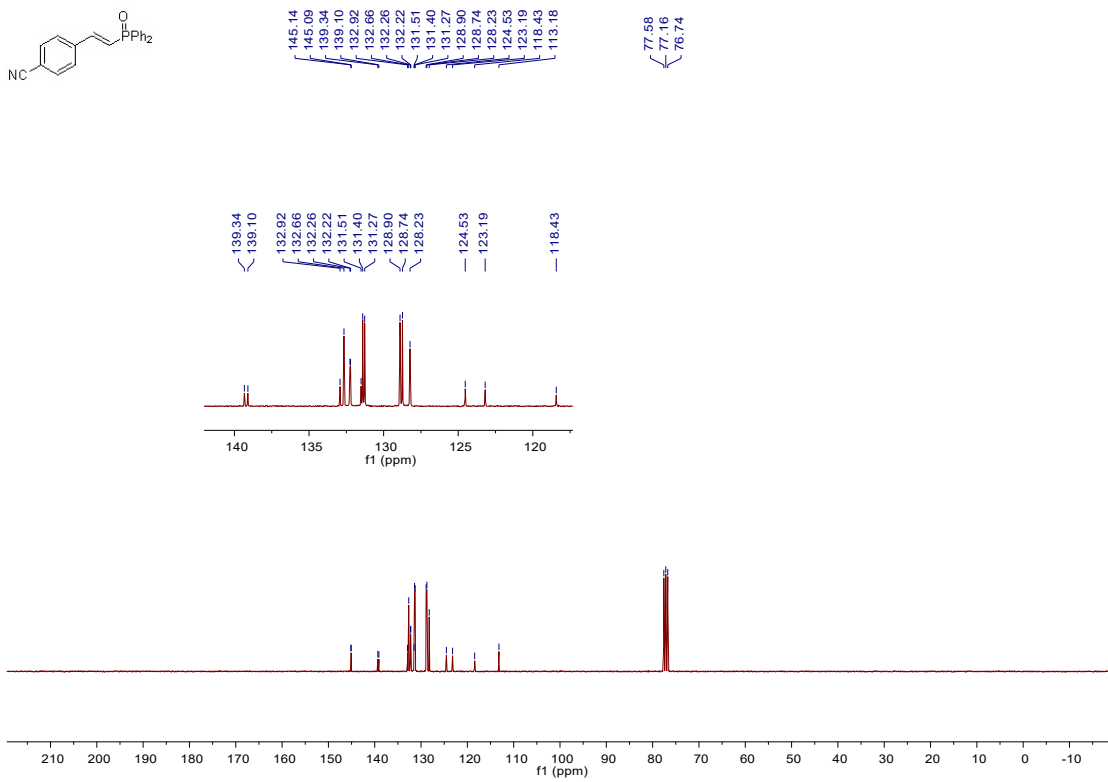

<sup>13</sup>C NMR of compound 5kk

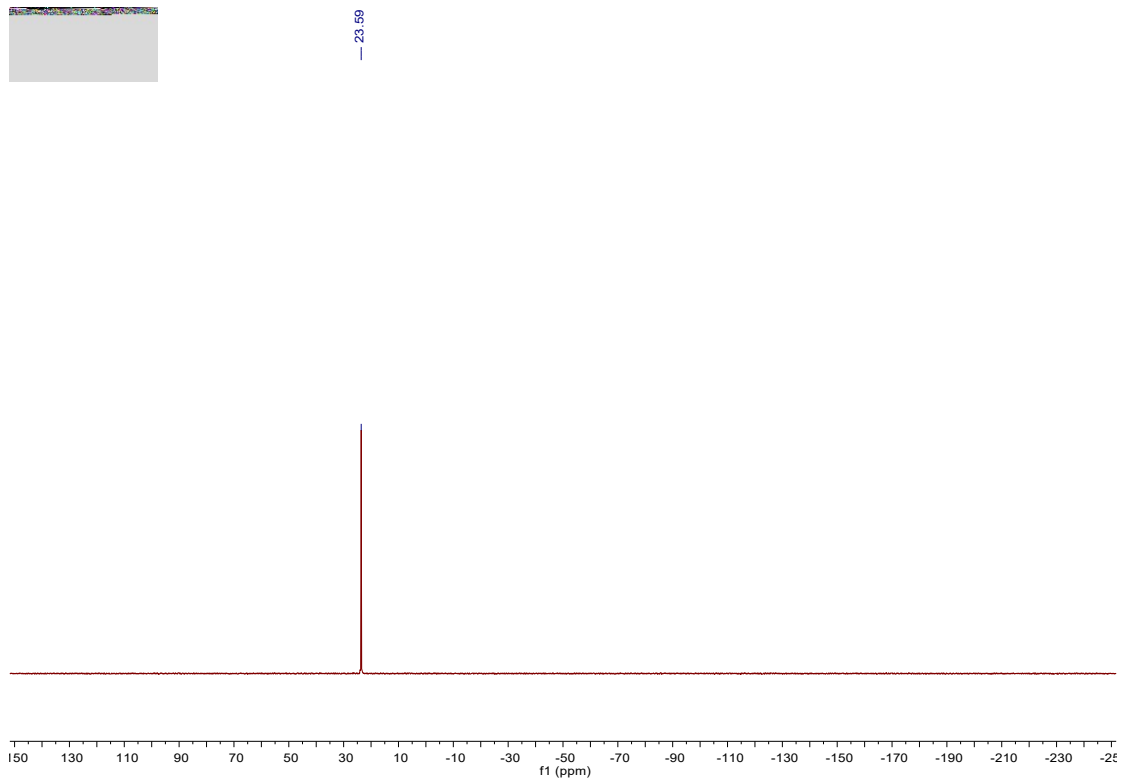

<sup>31</sup>P NMR of compound 5kk

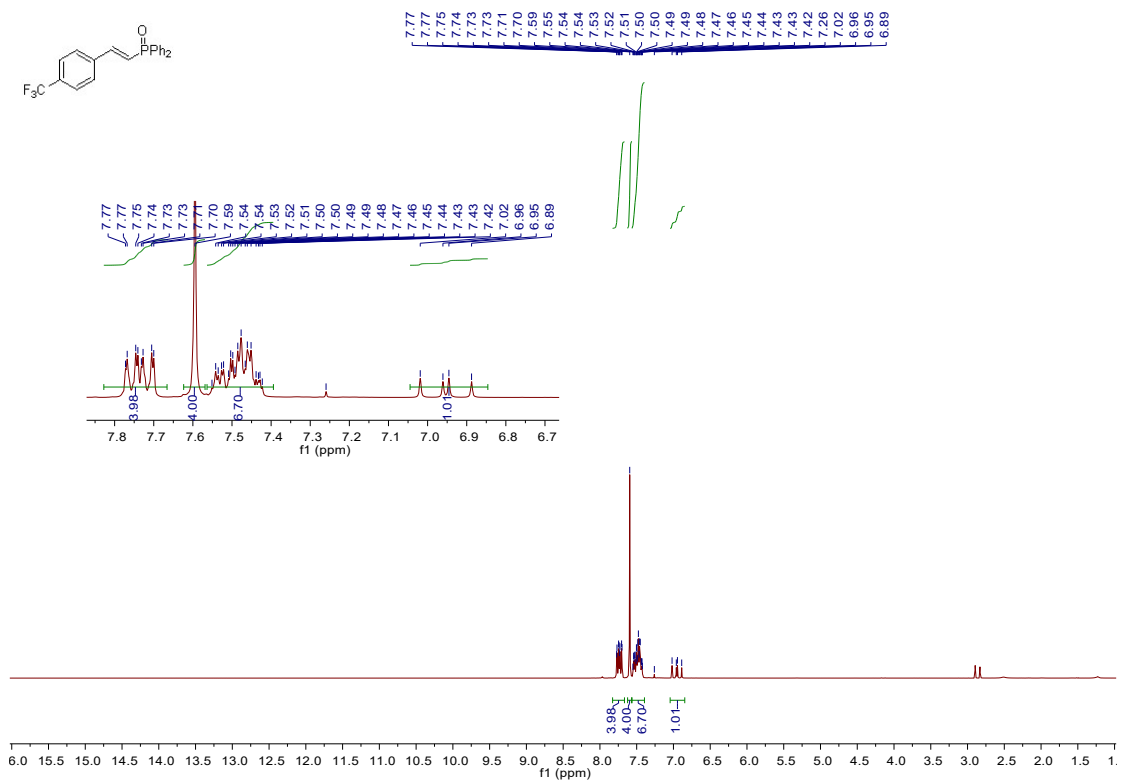

<sup>1</sup>H NMR of compound 5kk

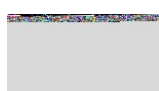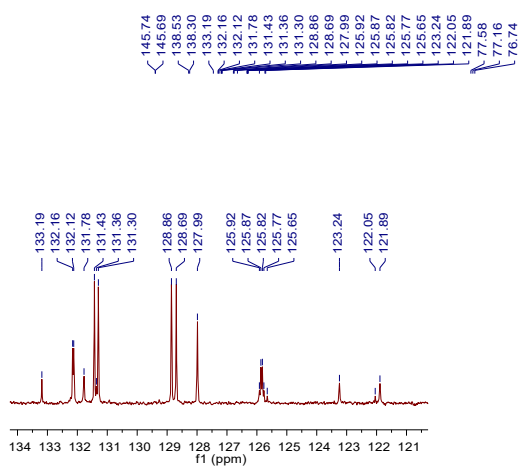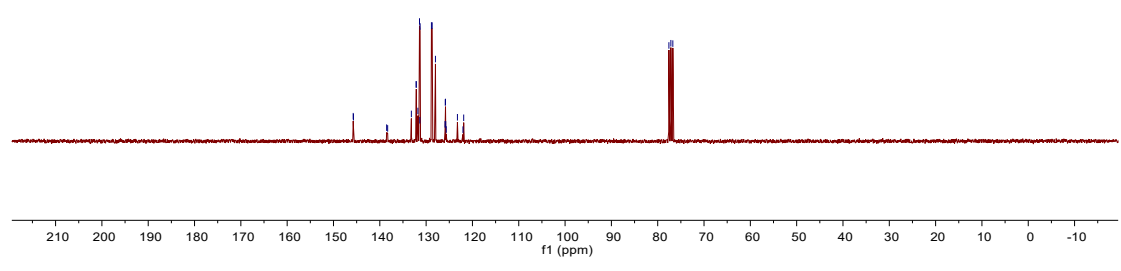

<sup>13</sup>C NMR of compound 5Ik

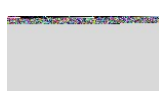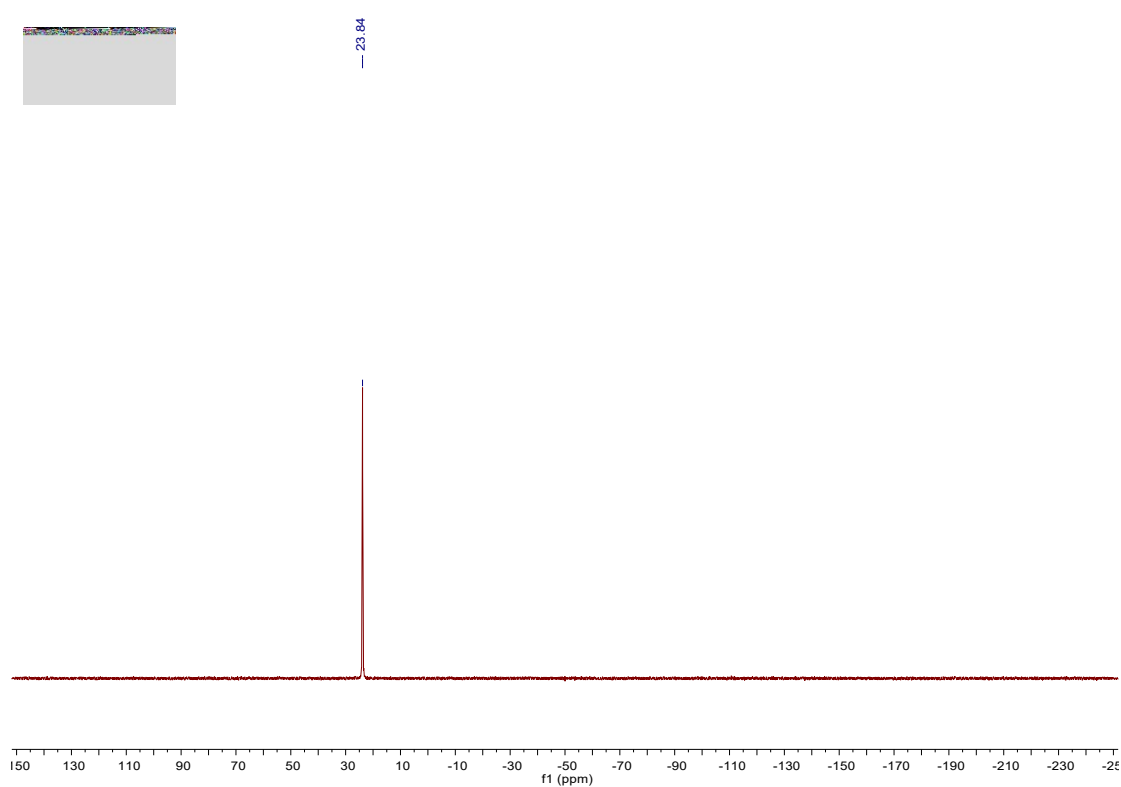

<sup>31</sup>P NMR of compound 5Ik

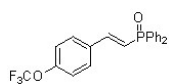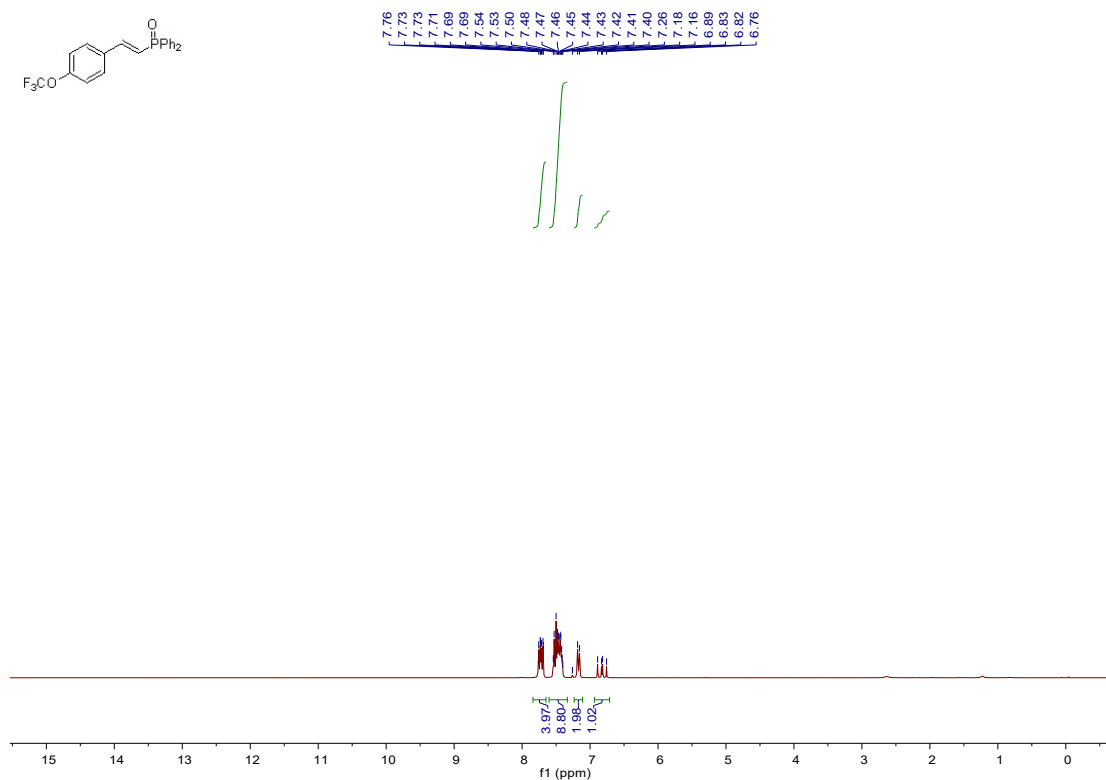

<sup>1</sup>H NMR of compound 5mk

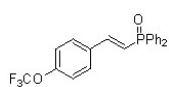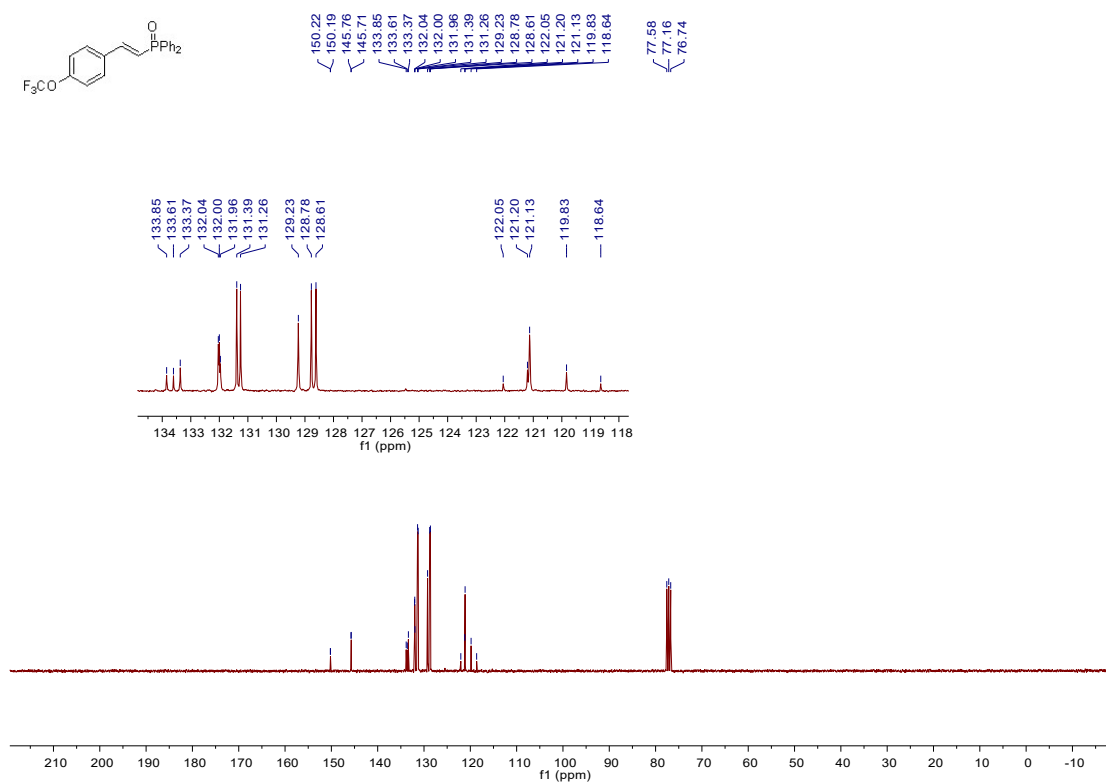

<sup>13</sup>C NMR of compound 5mk



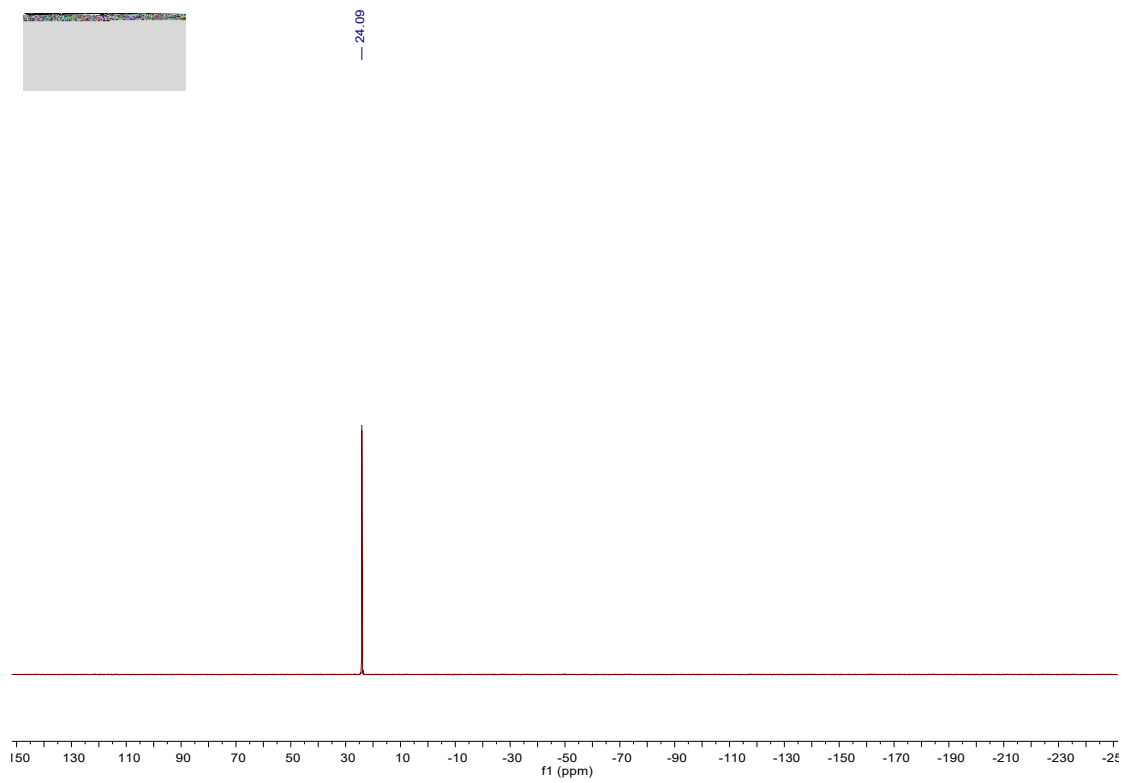

31P NMR of compound 5mk

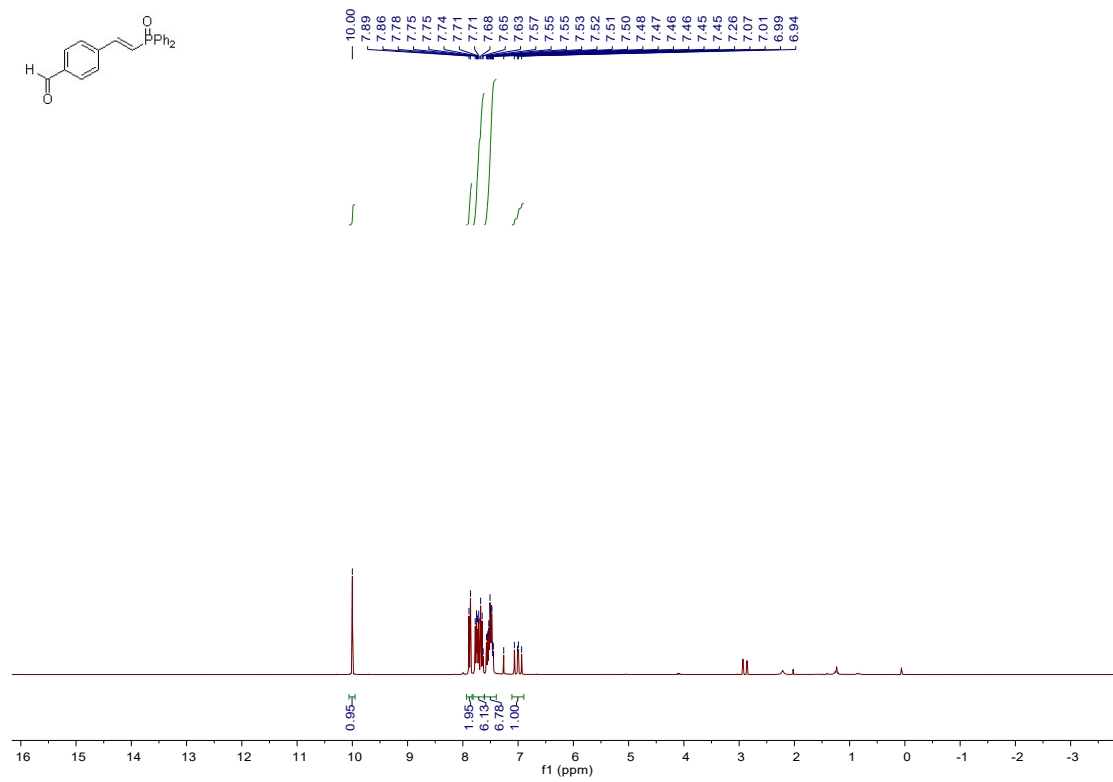

1H NMR of compound 5mk

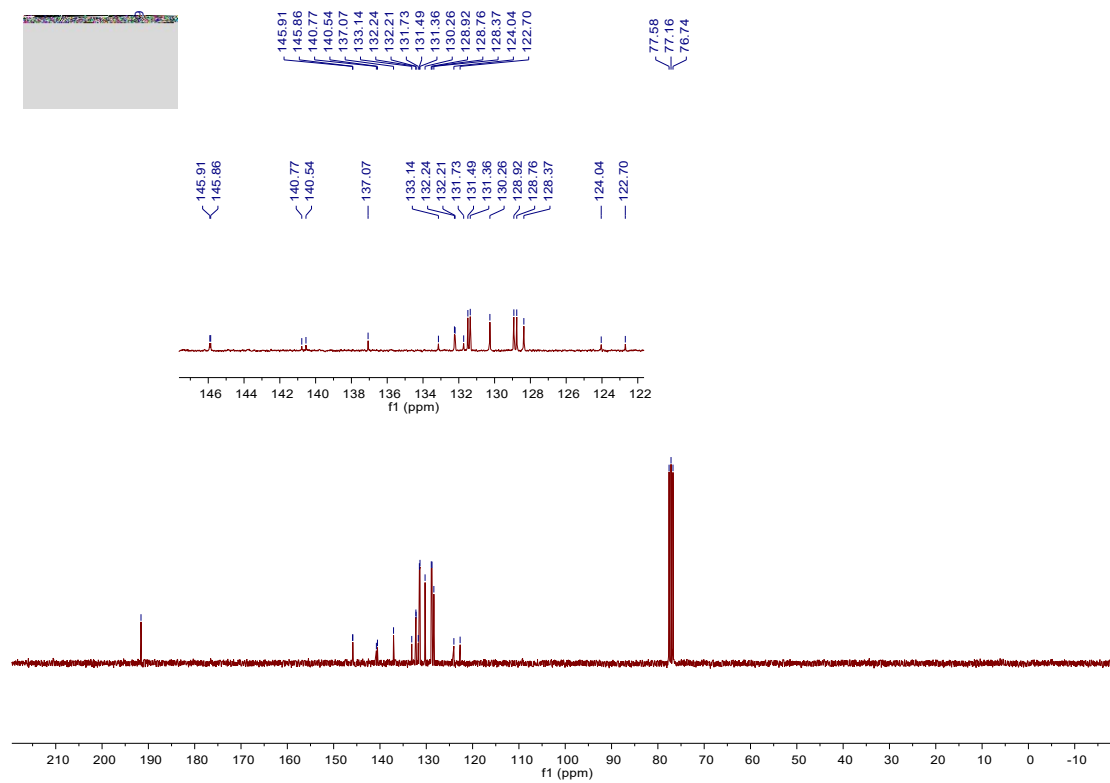

<sup>13</sup>C NMR of compound **5nk**

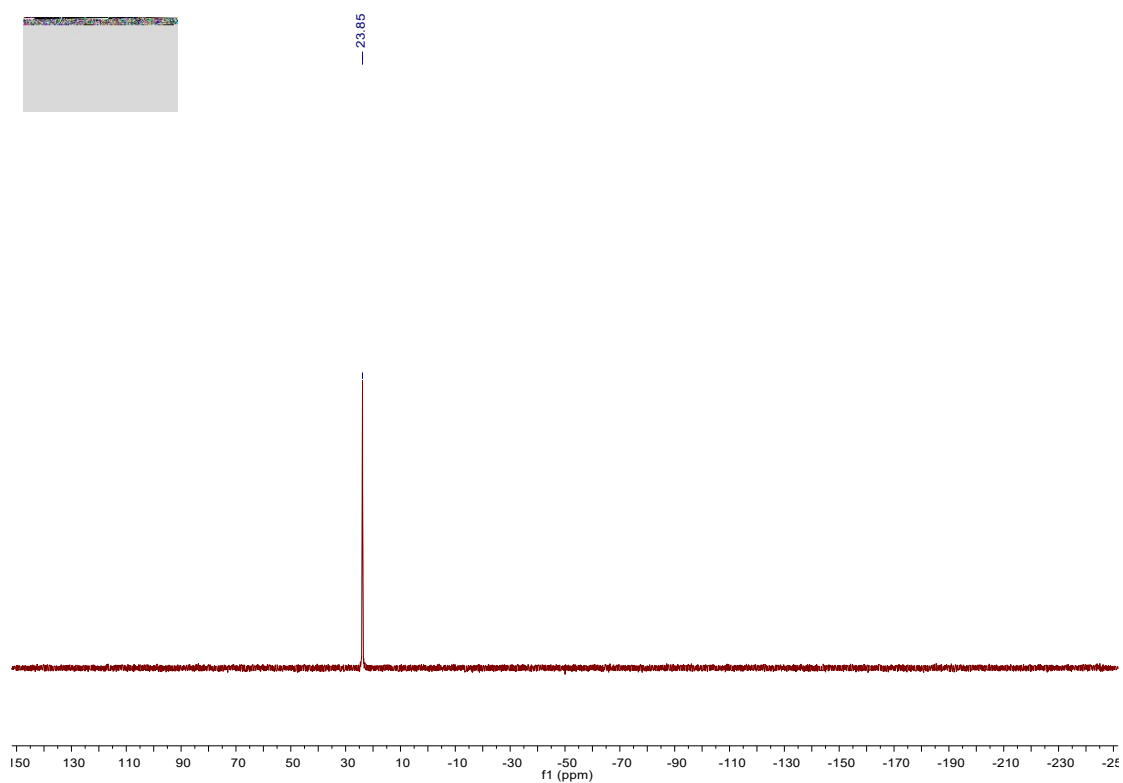

<sup>31</sup>P NMR of compound **5nk**

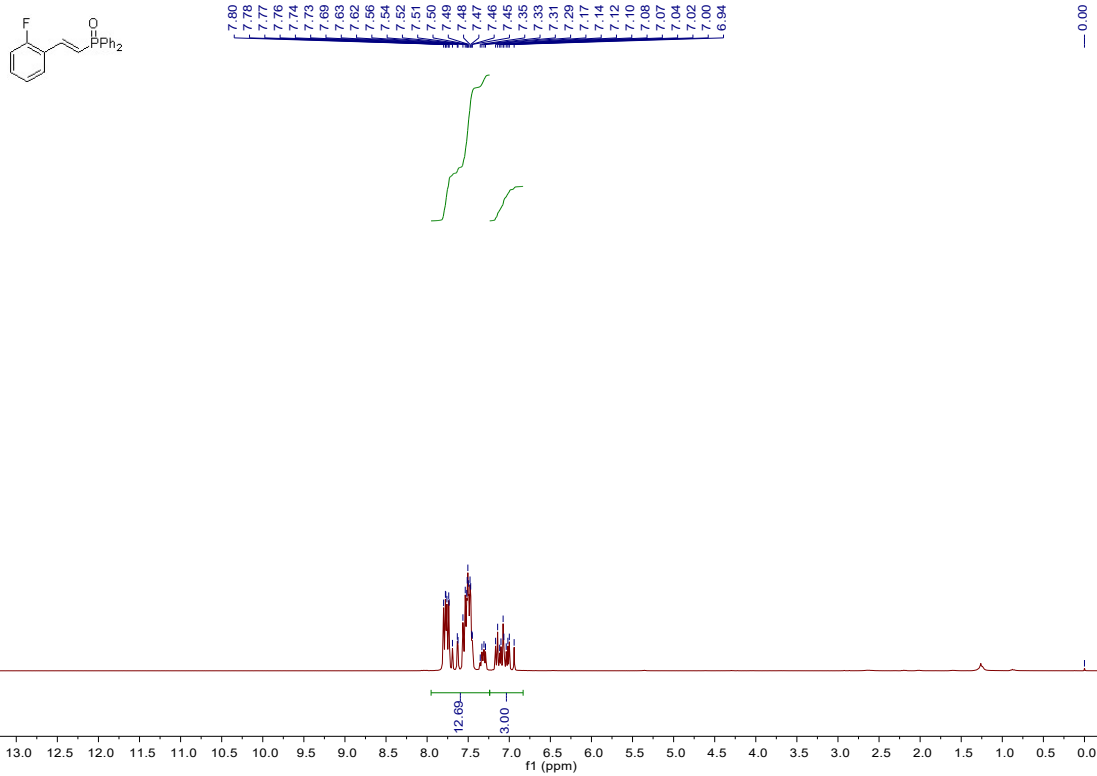

**<sup>1</sup>H NMR of compound 50k**

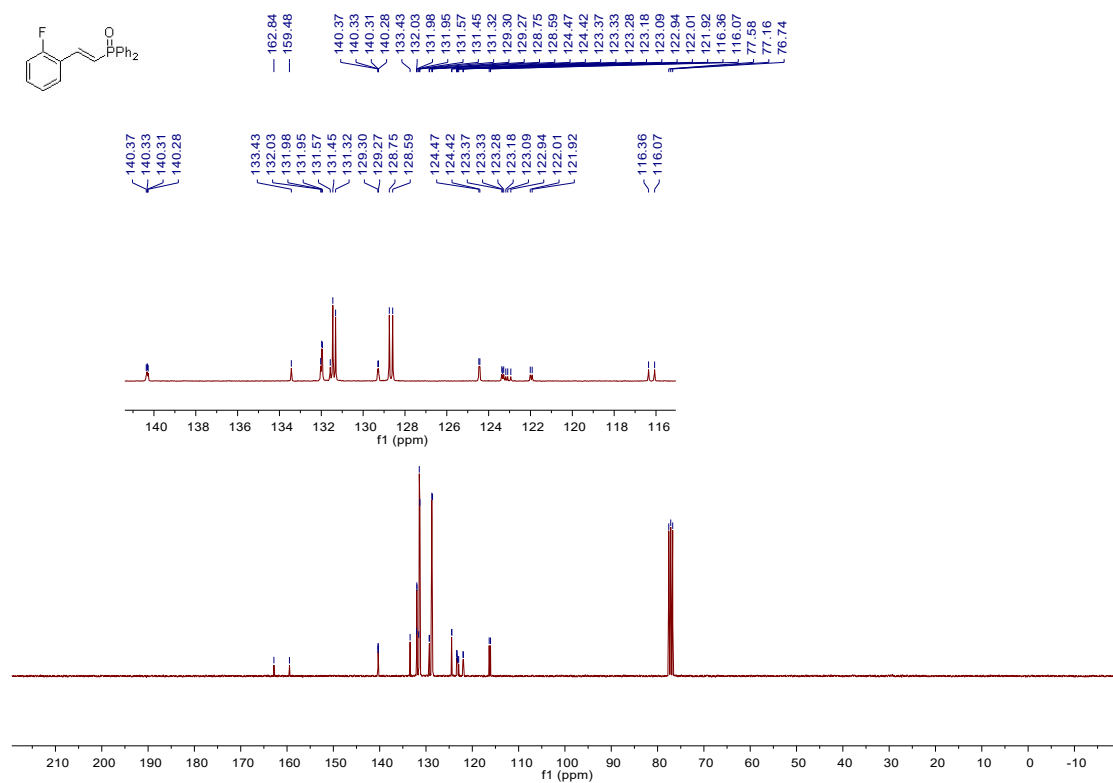

**<sup>13</sup>C NMR of compound 50k**

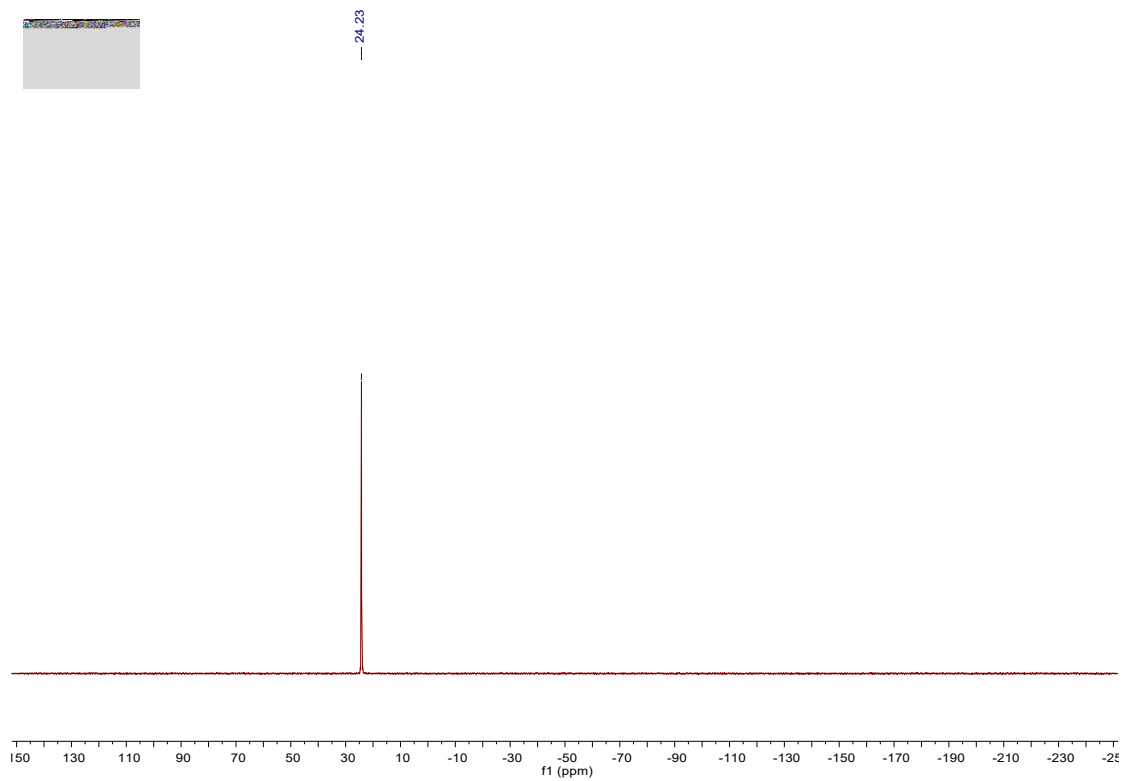

<sup>31</sup>P NMR of compound 5k

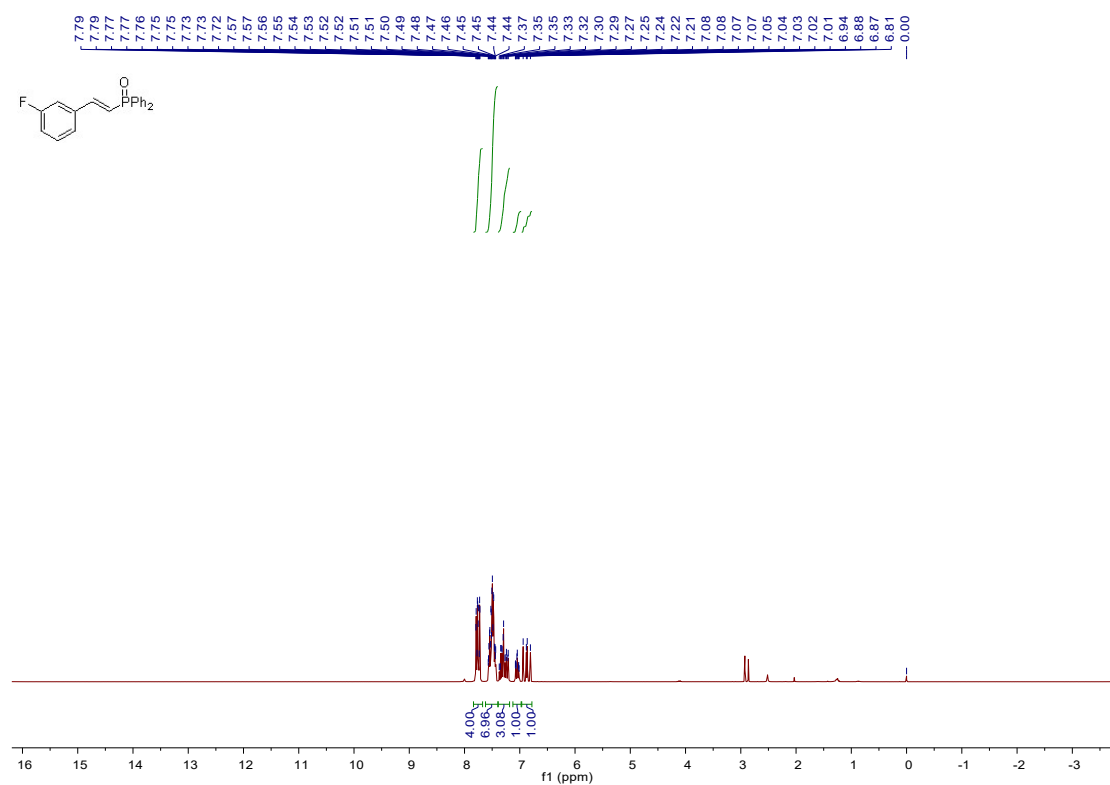

<sup>1</sup>H NMR of compound 5k

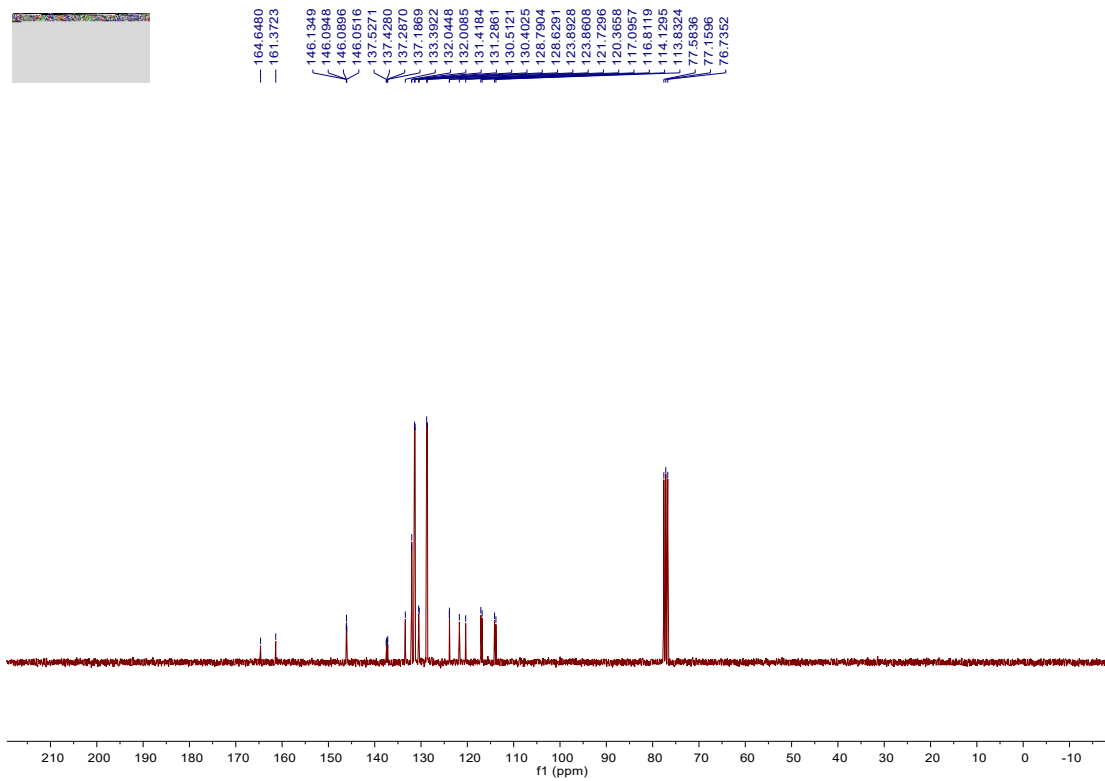

$^{13}\text{C}$  NMR of compound **5pk**

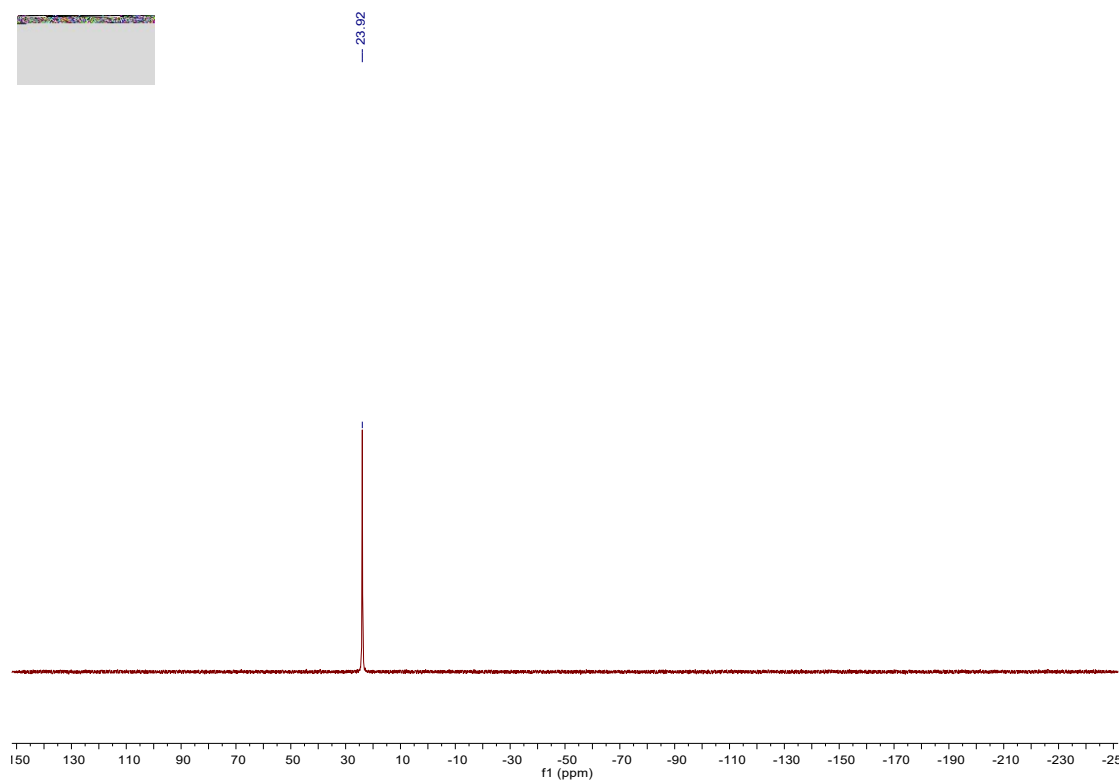

$^{31}\text{P}$  NMR of compound **5pk**

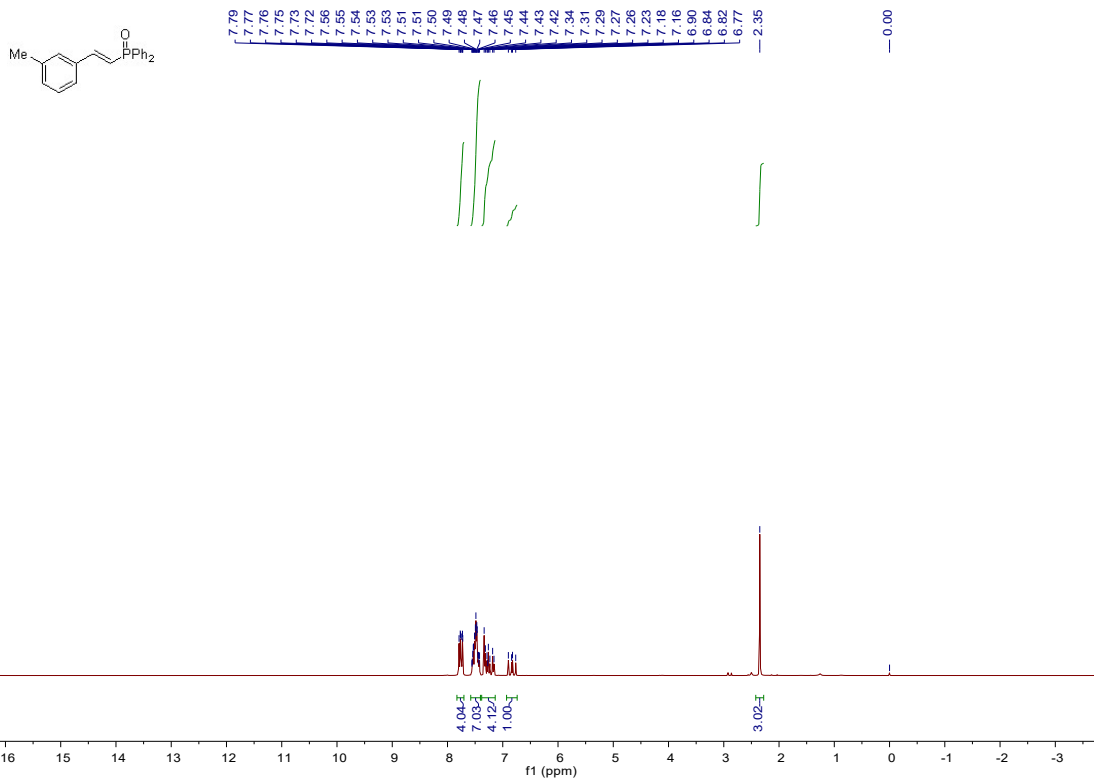

<sup>1</sup>H NMR of compound **5qk**

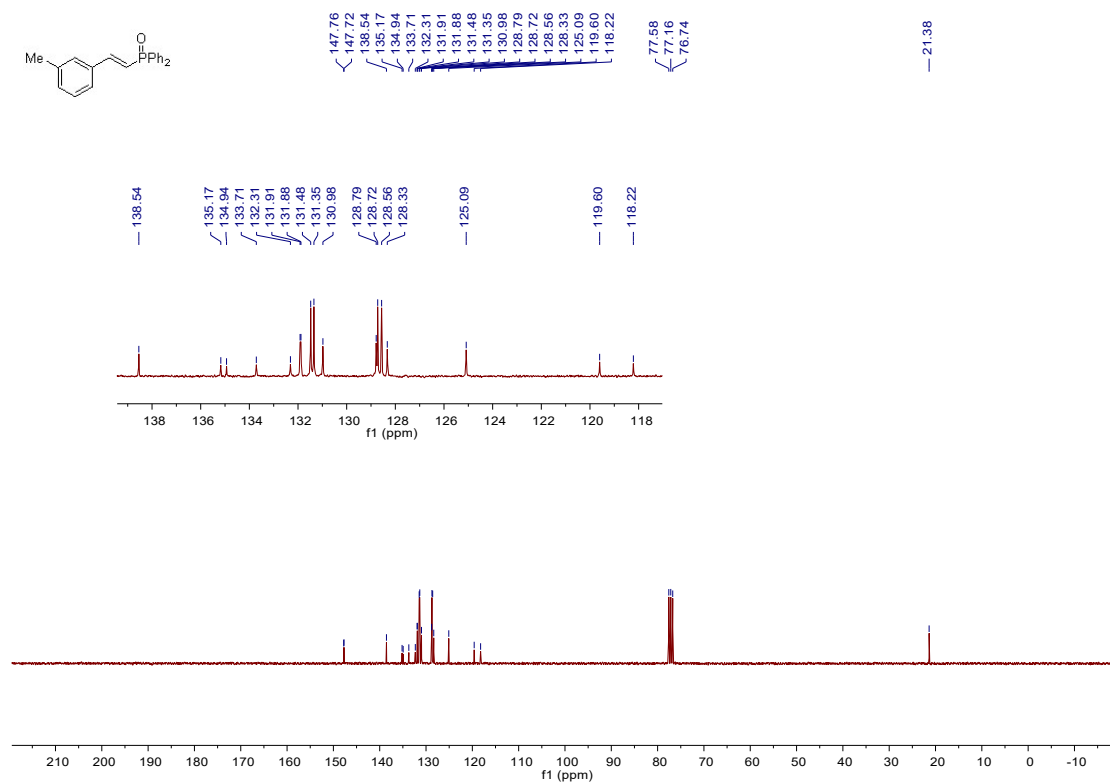

<sup>13</sup>C NMR of compound **5qk**

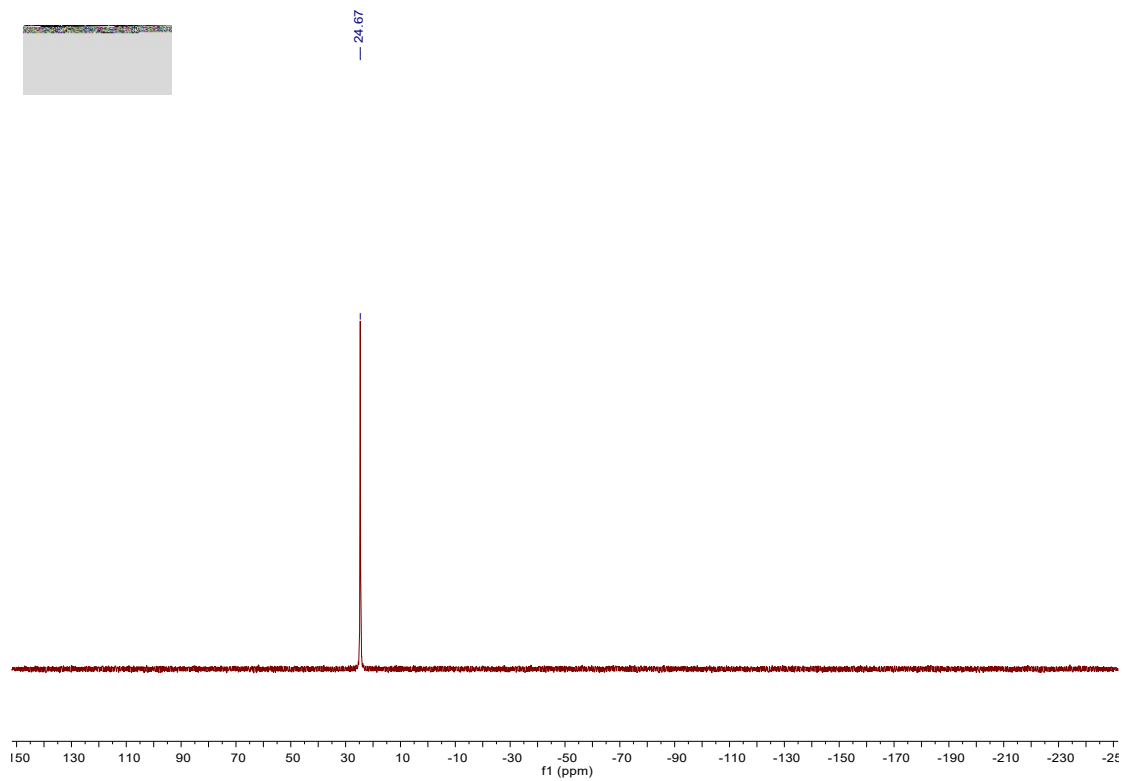

$^{31}\text{P}$  NMR of compound **5qk**

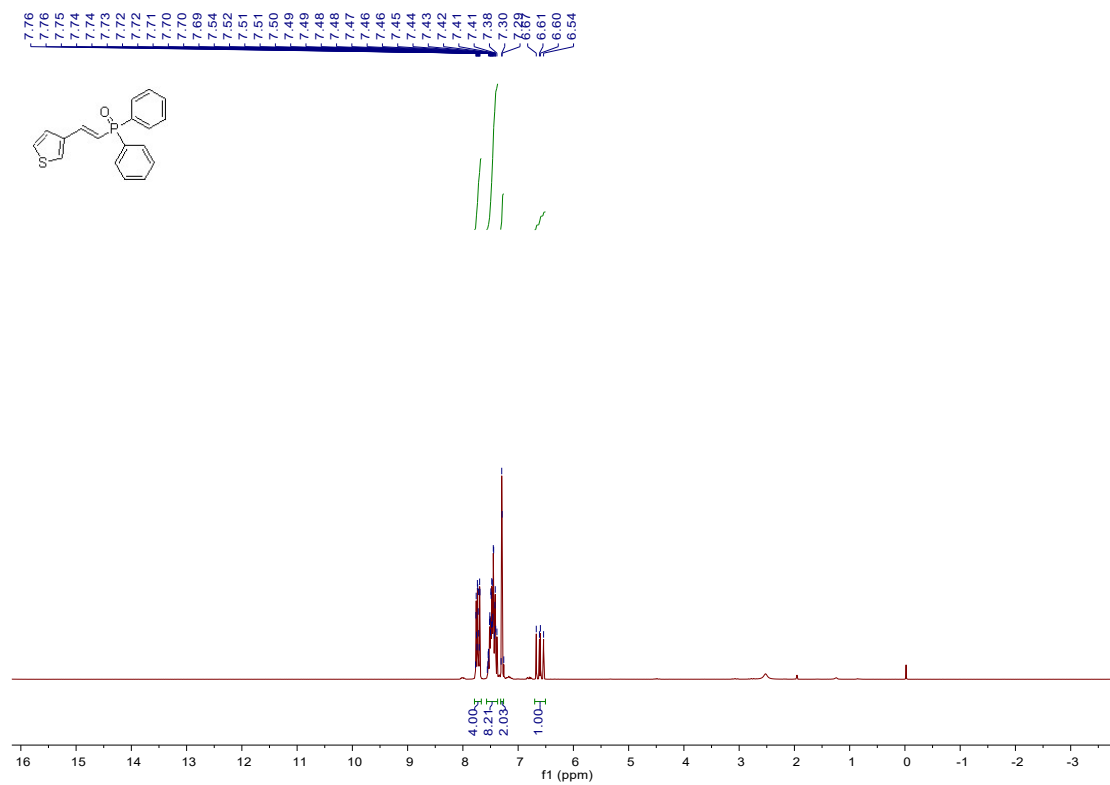

$^1\text{H}$  NMR of compound **5rk**

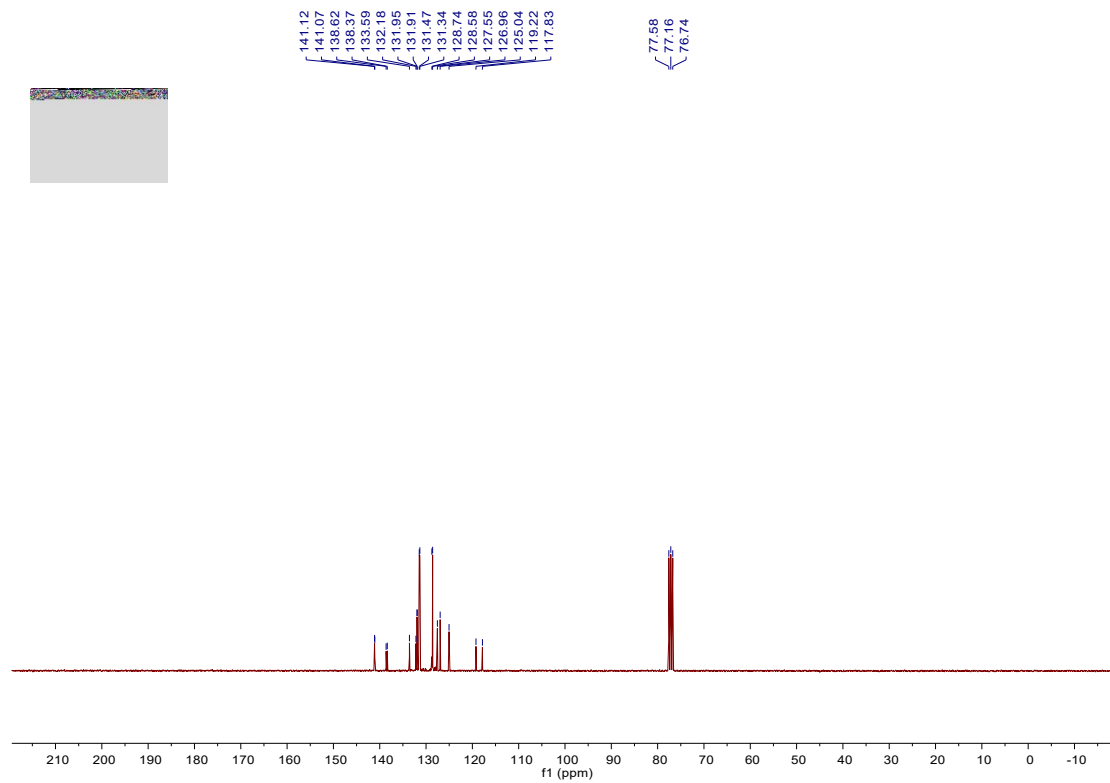

<sup>13</sup>C NMR of compound 5rk

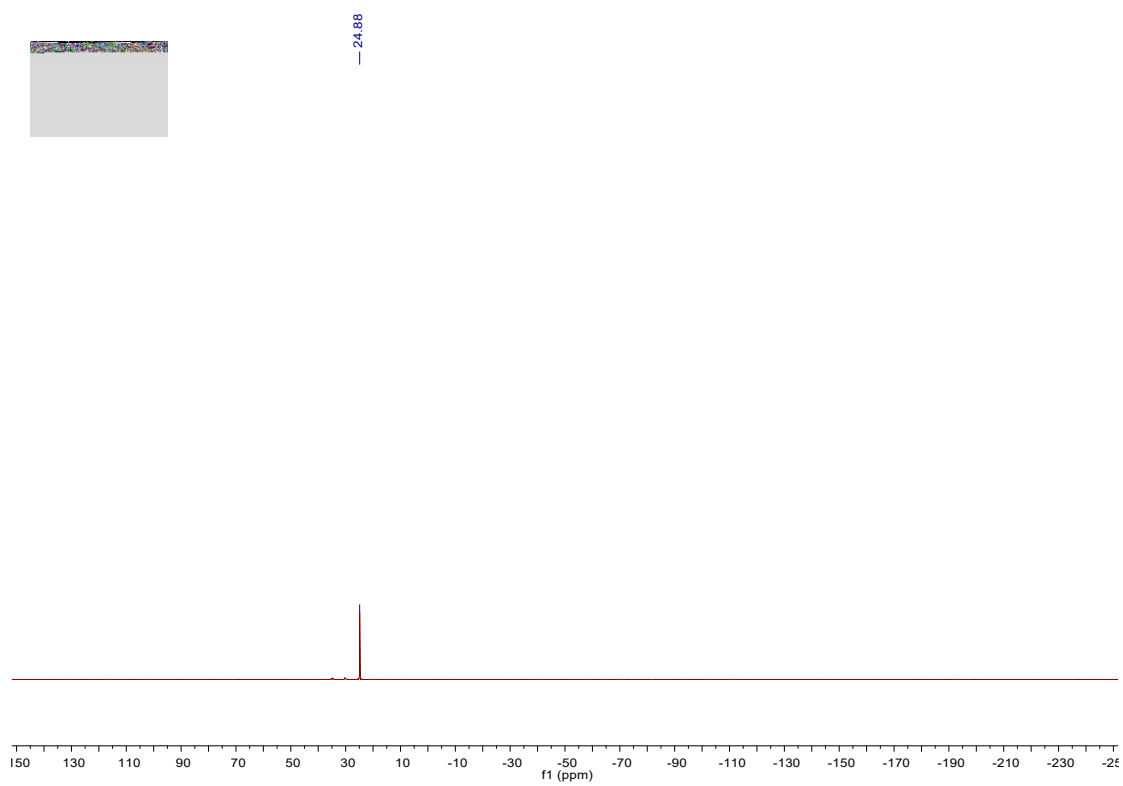

<sup>31</sup>P NMR of compound 5rk



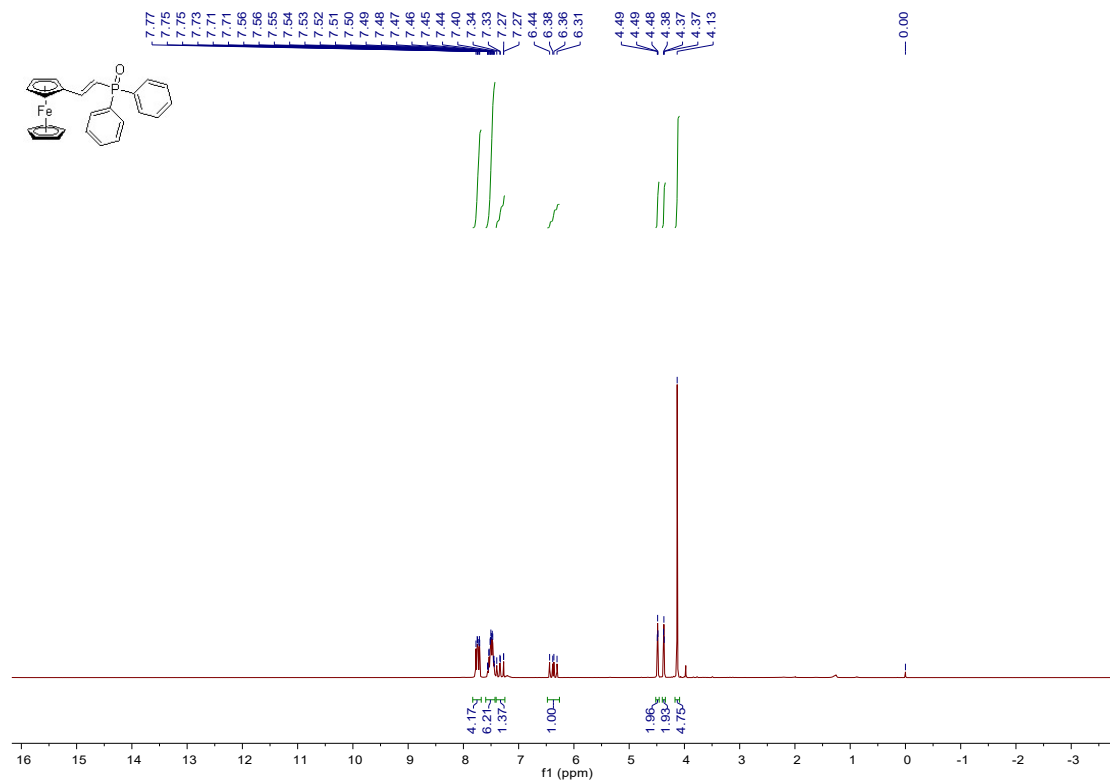

<sup>1</sup>H NMR of compound 5sk

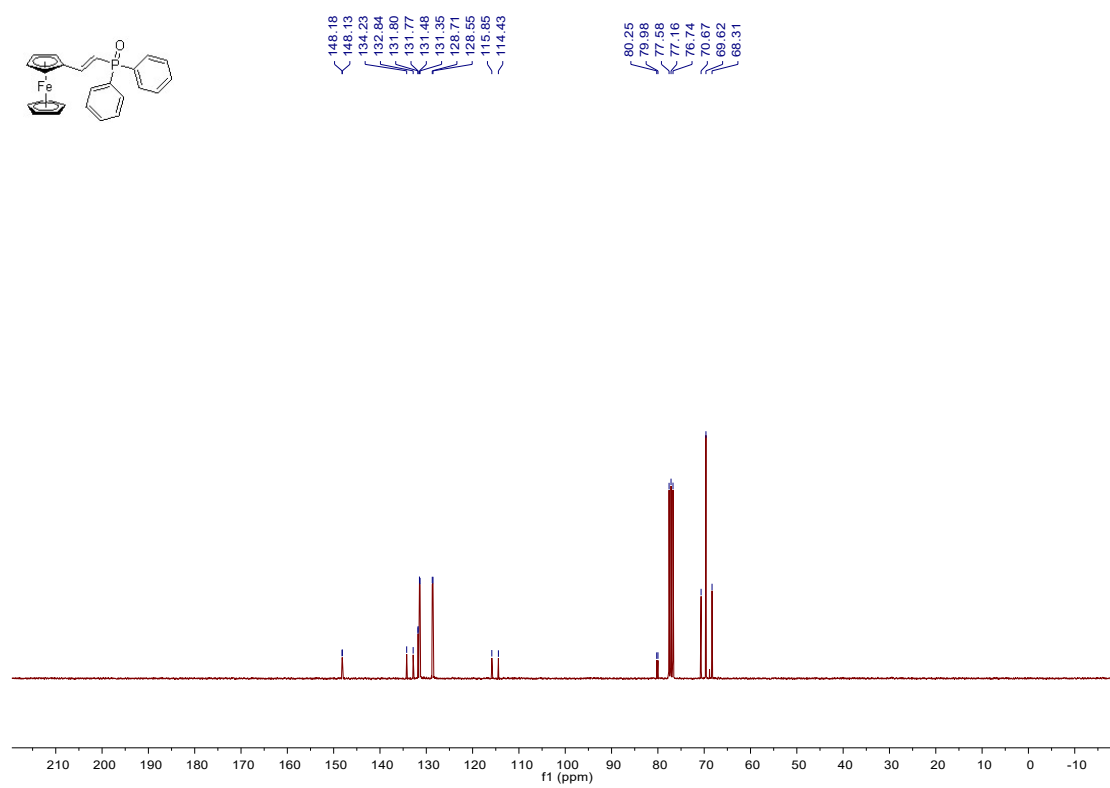

<sup>13</sup>C NMR of compound 5sk

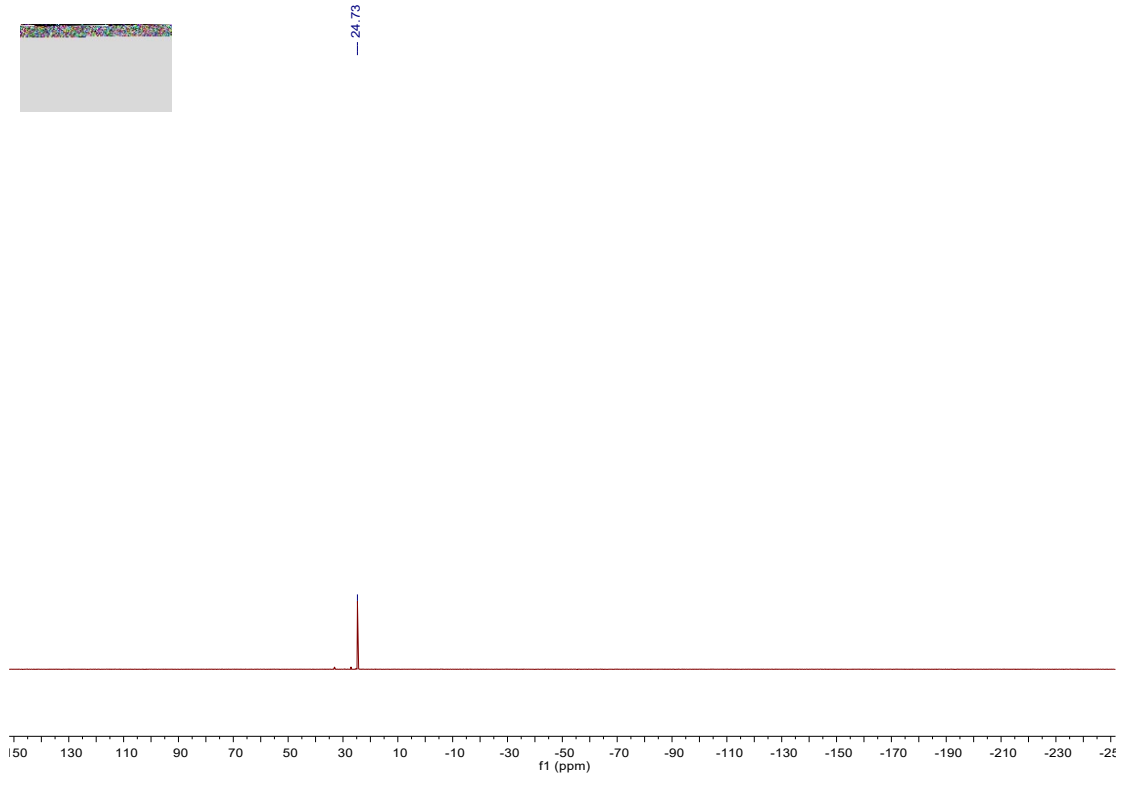

31P NMR of compound 5sk

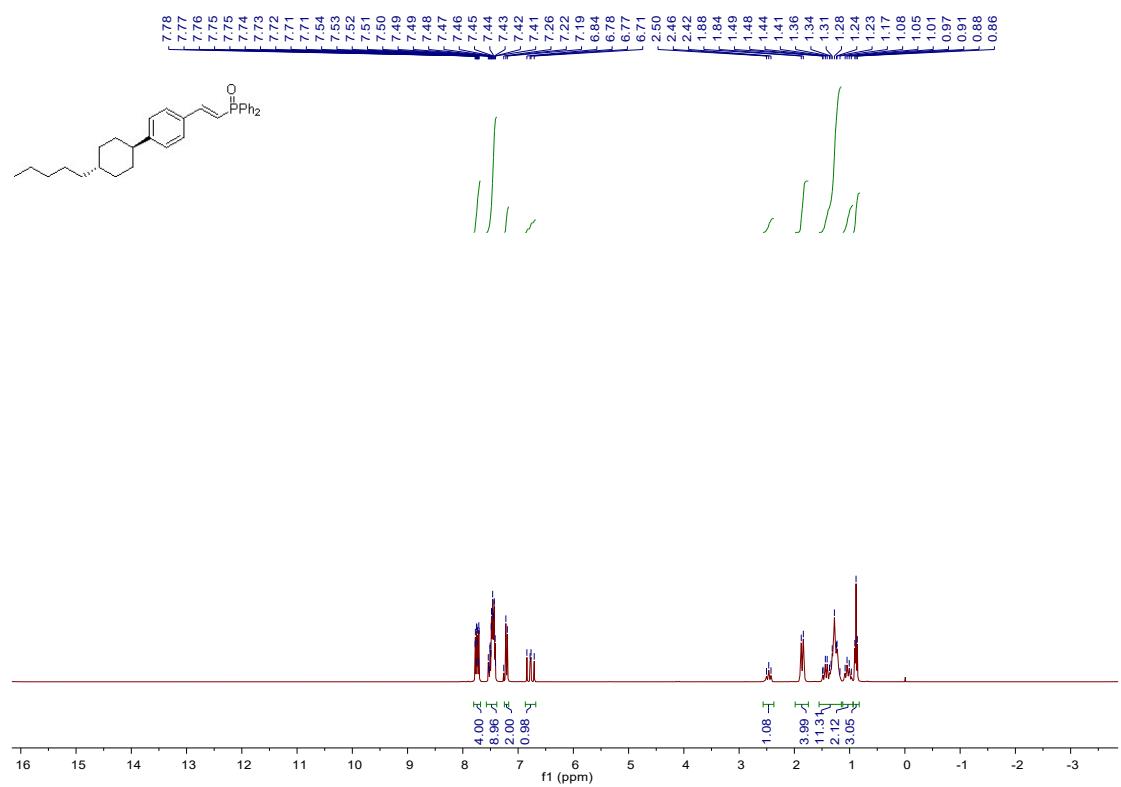

1H NMR of compound 5tk

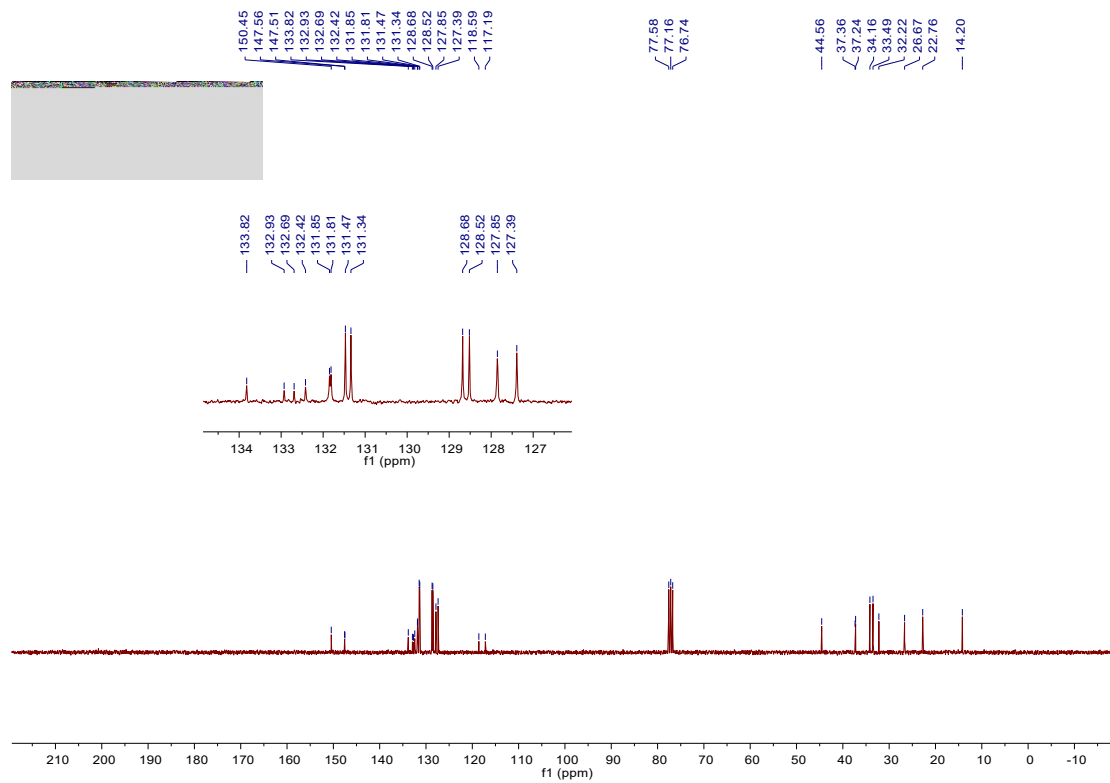

$^{13}\text{C}$  NMR of compound **5tk**

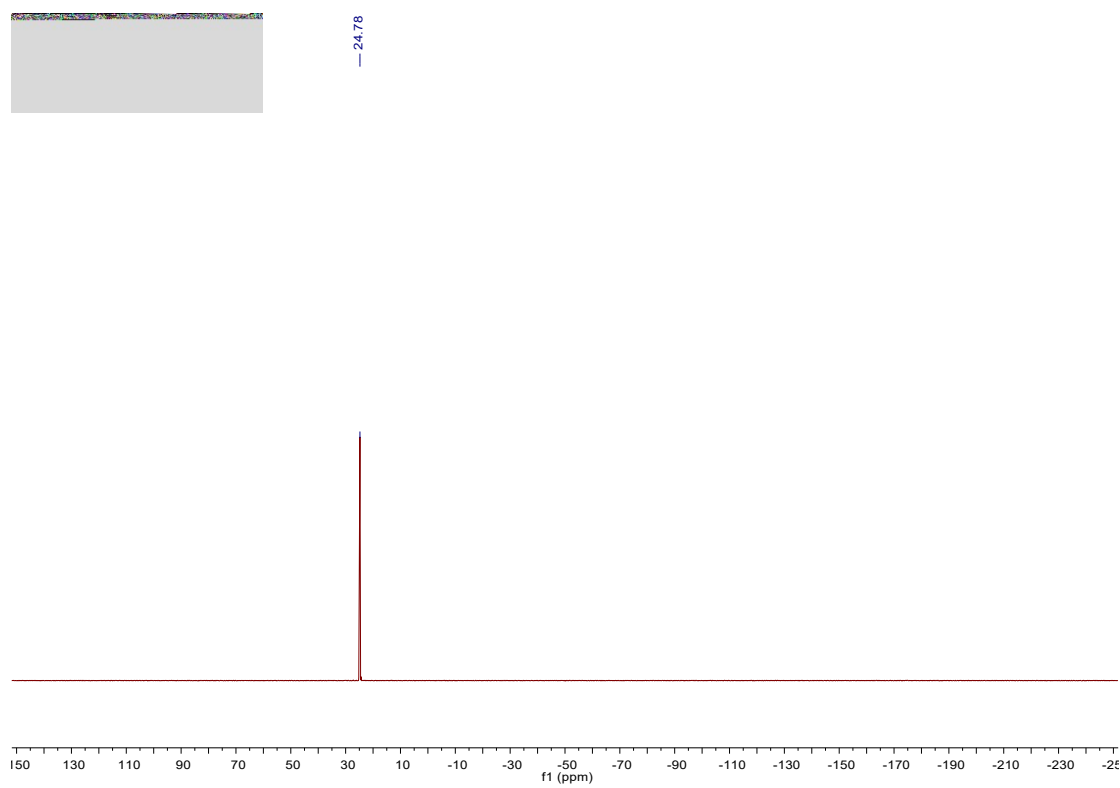

$^{31}\text{P}$  NMR of compound **5tk**

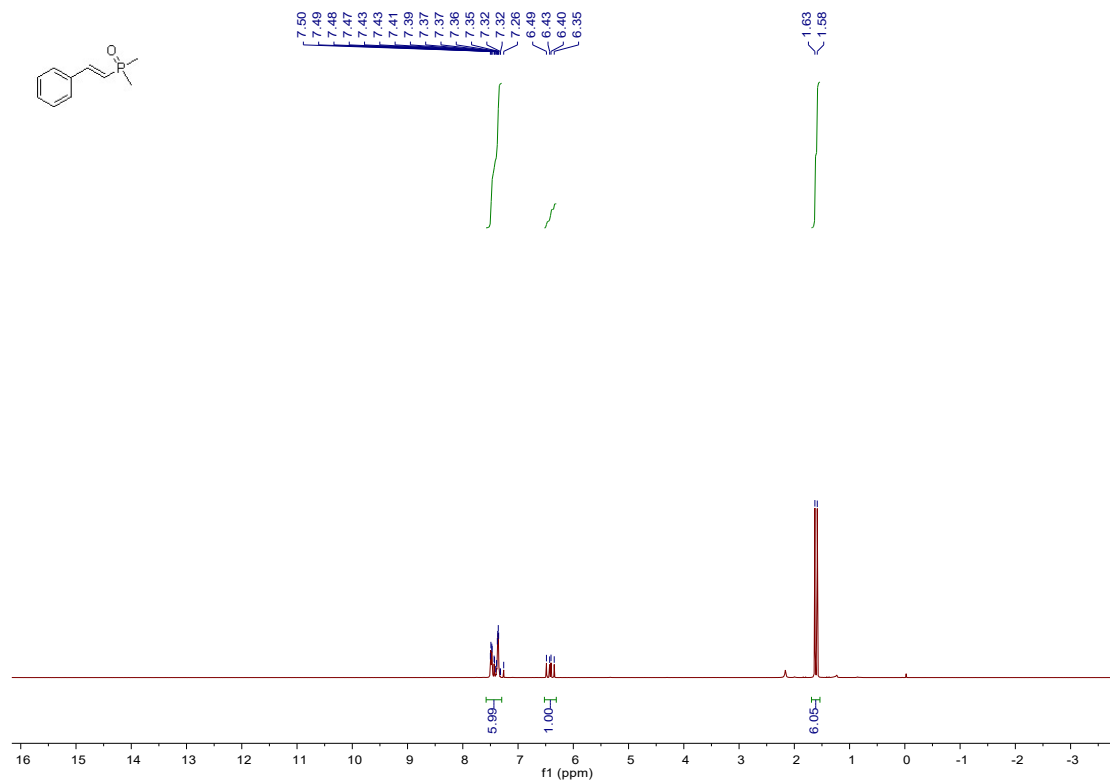

<sup>1</sup>H NMR of compound 5aw

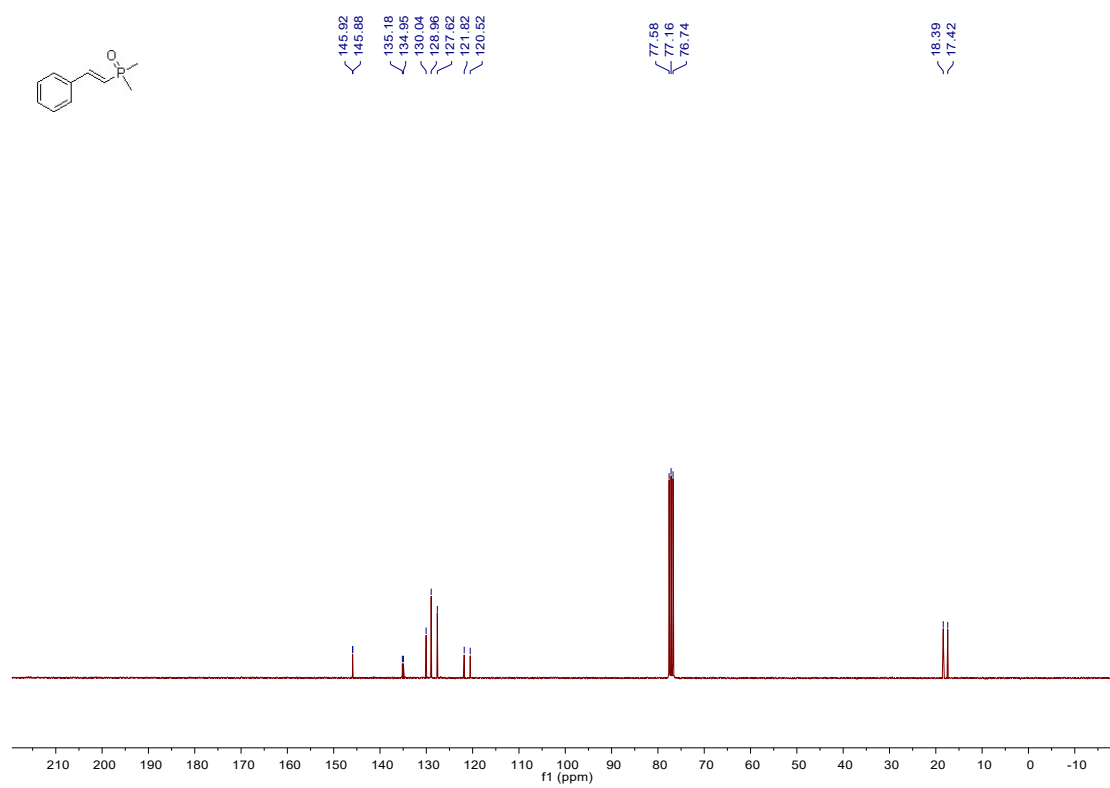

<sup>13</sup>C NMR of compound 5aw

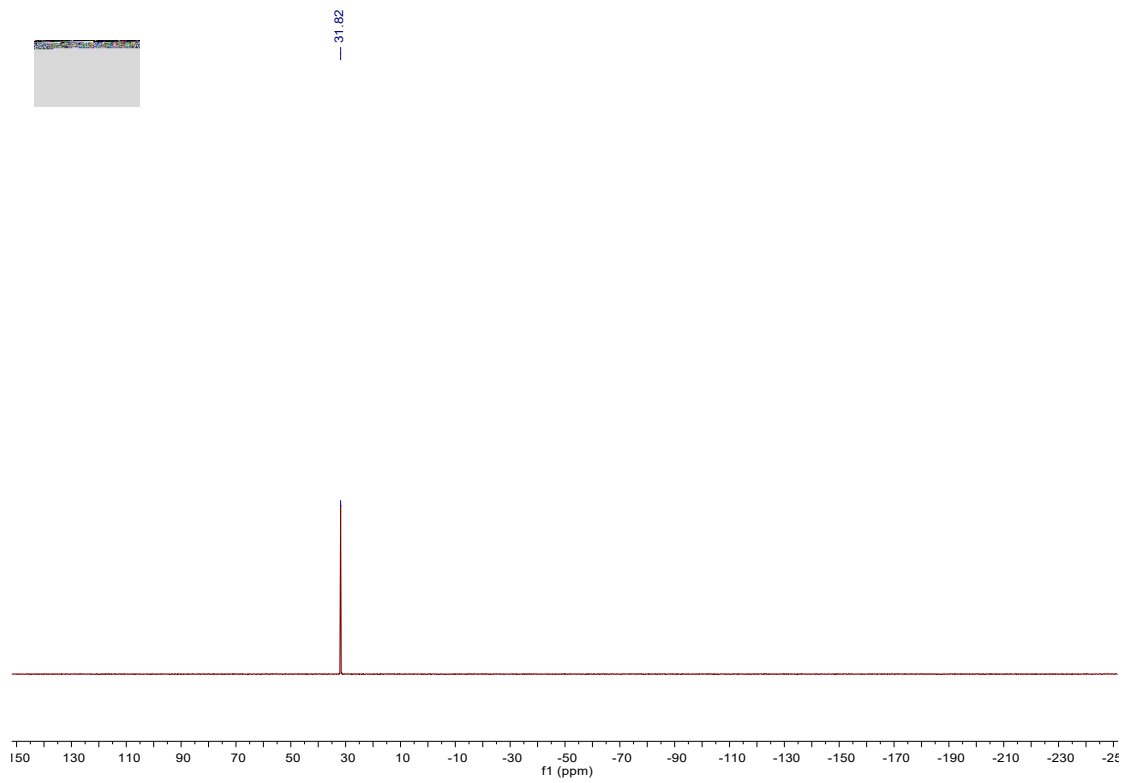

<sup>31</sup>P NMR of compound 5aw

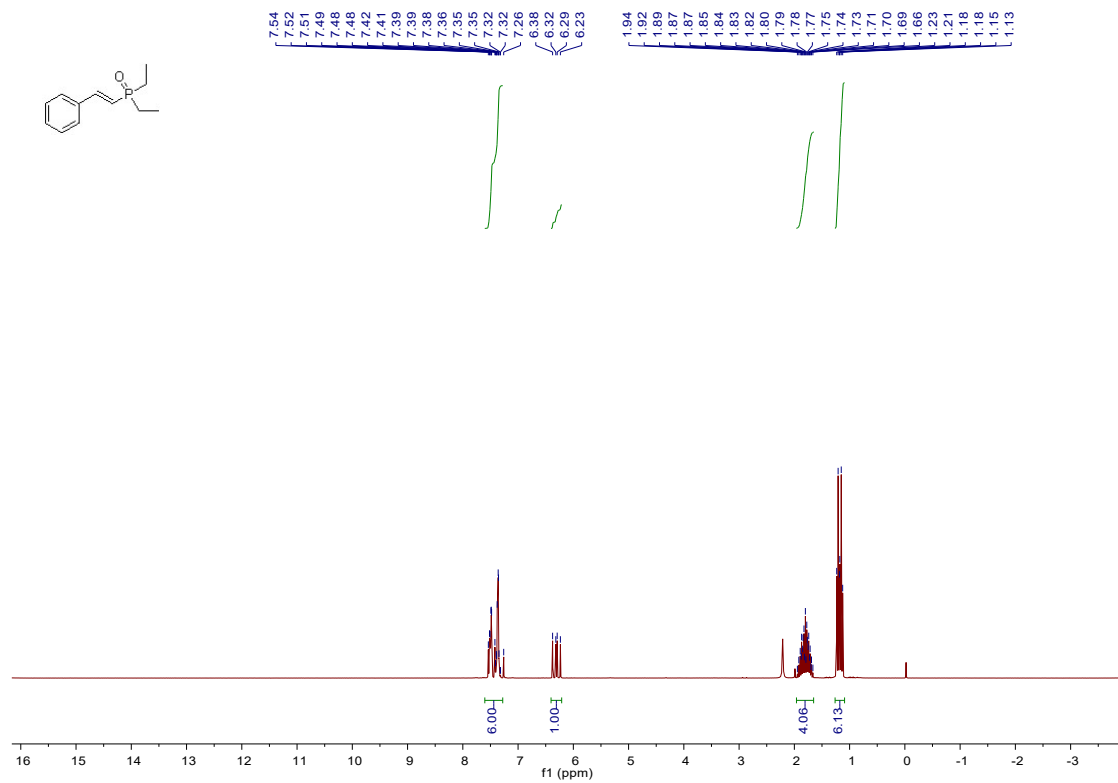

<sup>1</sup>H NMR of compound 5ax

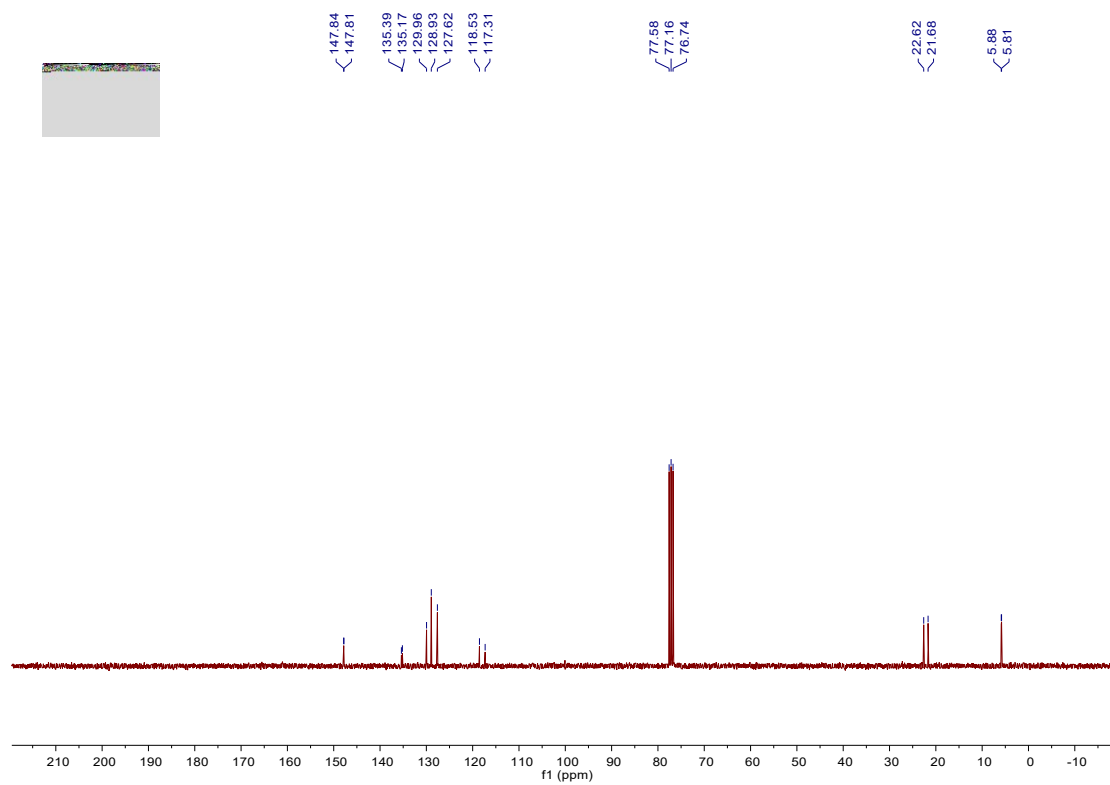

<sup>13</sup>C NMR of compound 5ax

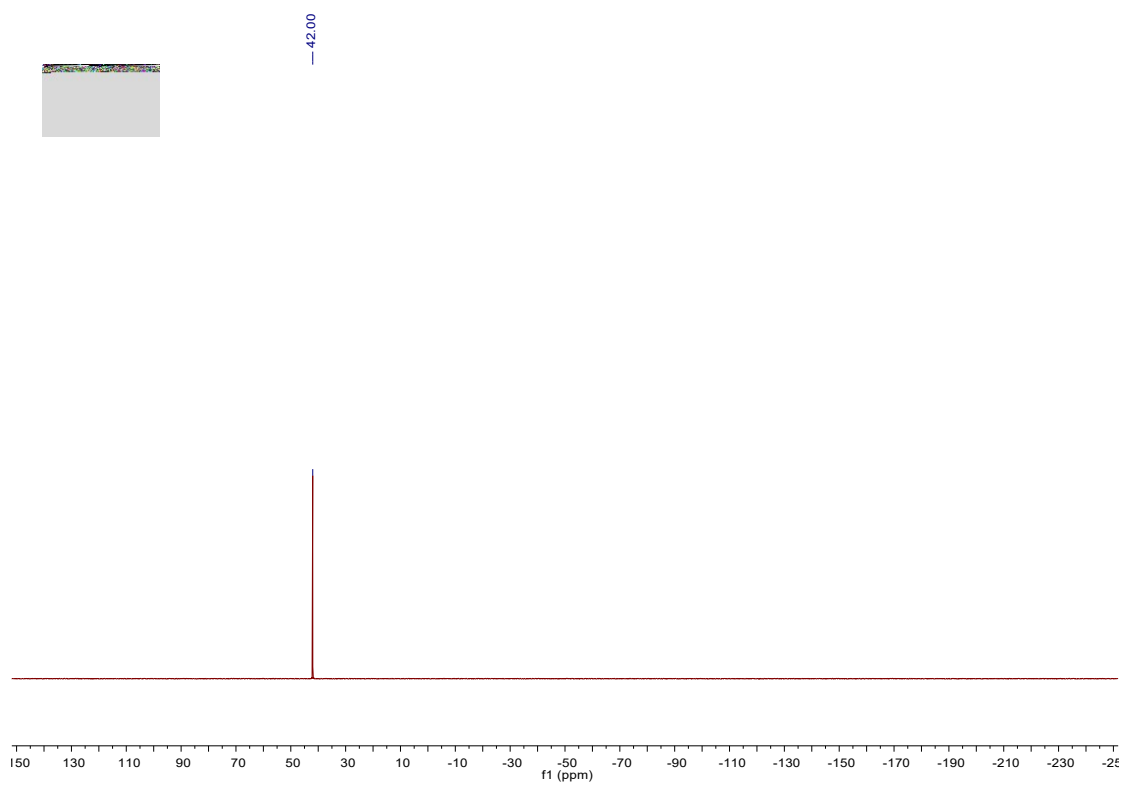

<sup>31</sup>P NMR of compound 5ax

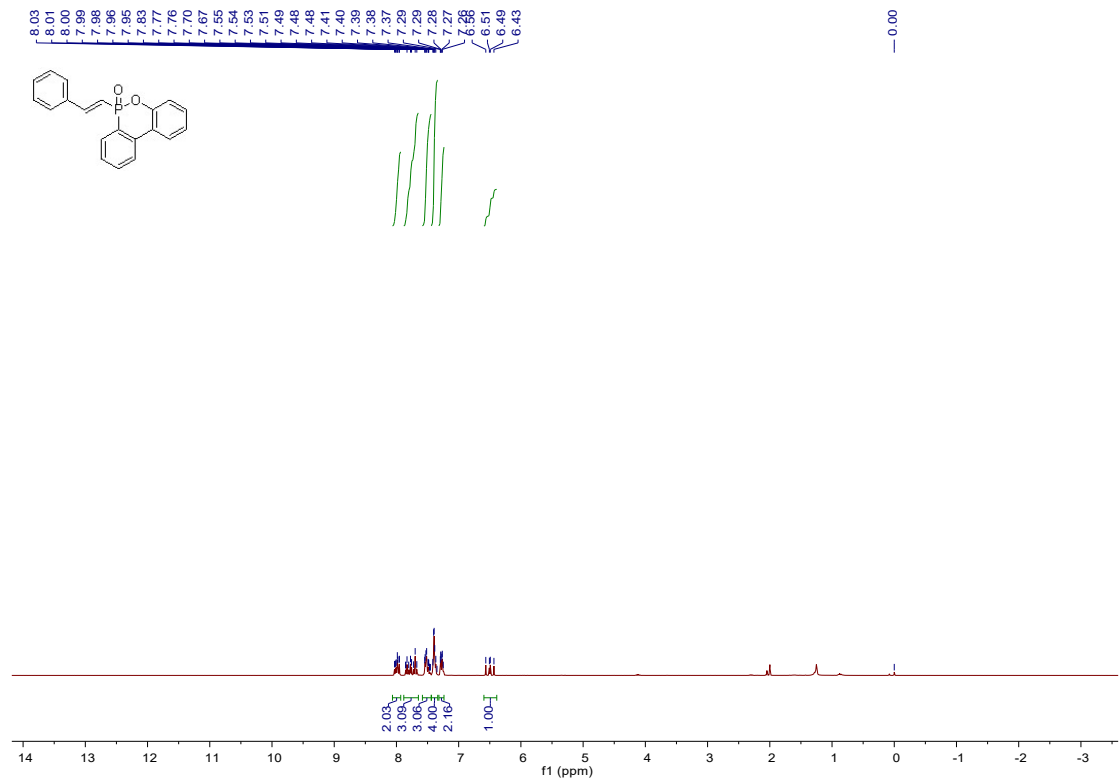

<sup>1</sup>H NMR of compound 5ay

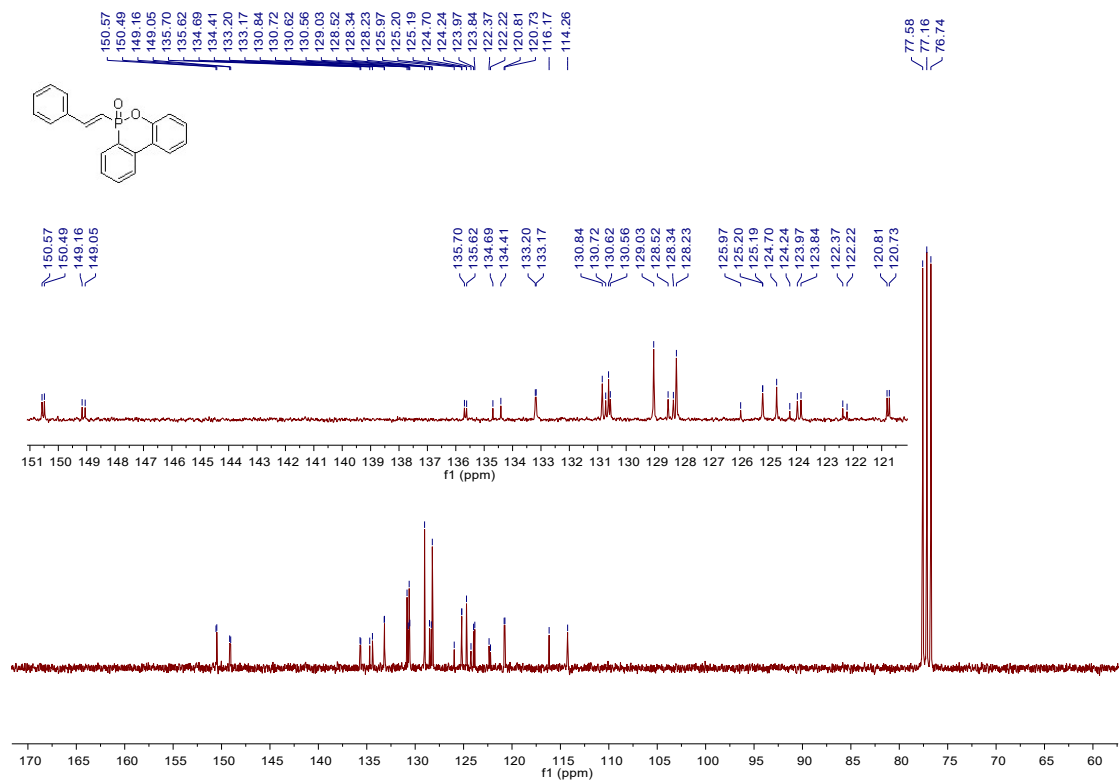

<sup>13</sup>C NMR of compound 5ay

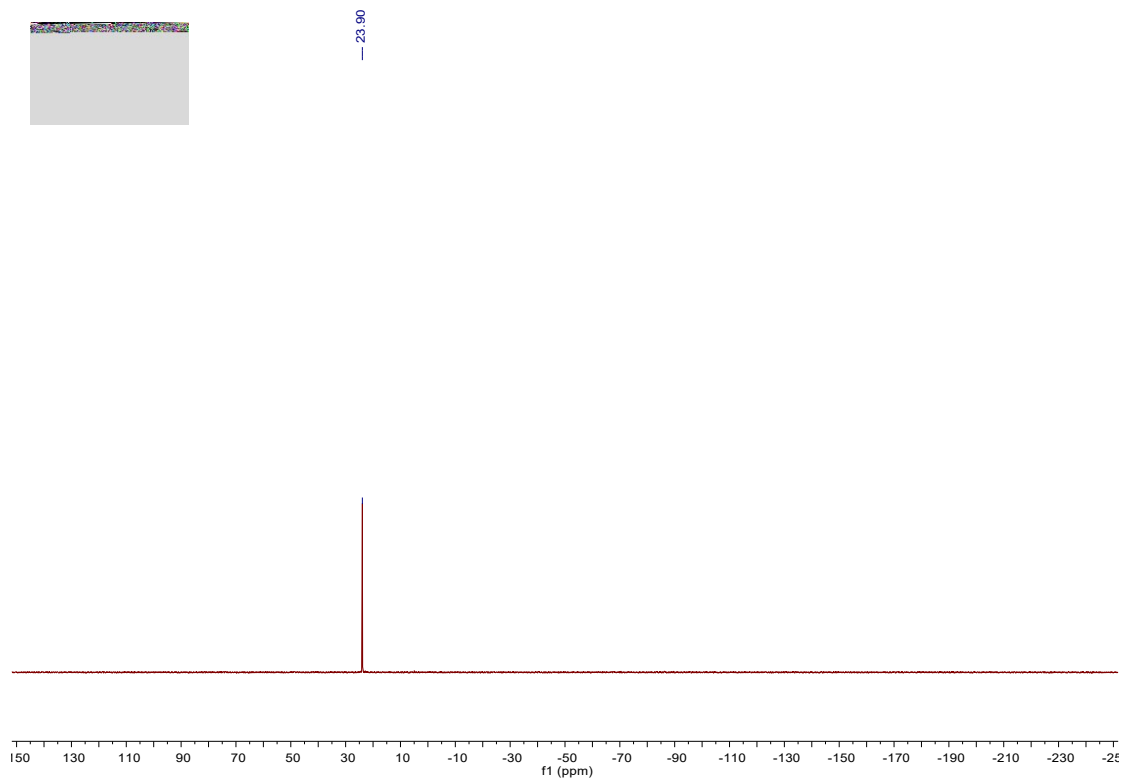

<sup>31</sup>P NMR of compound 5ay

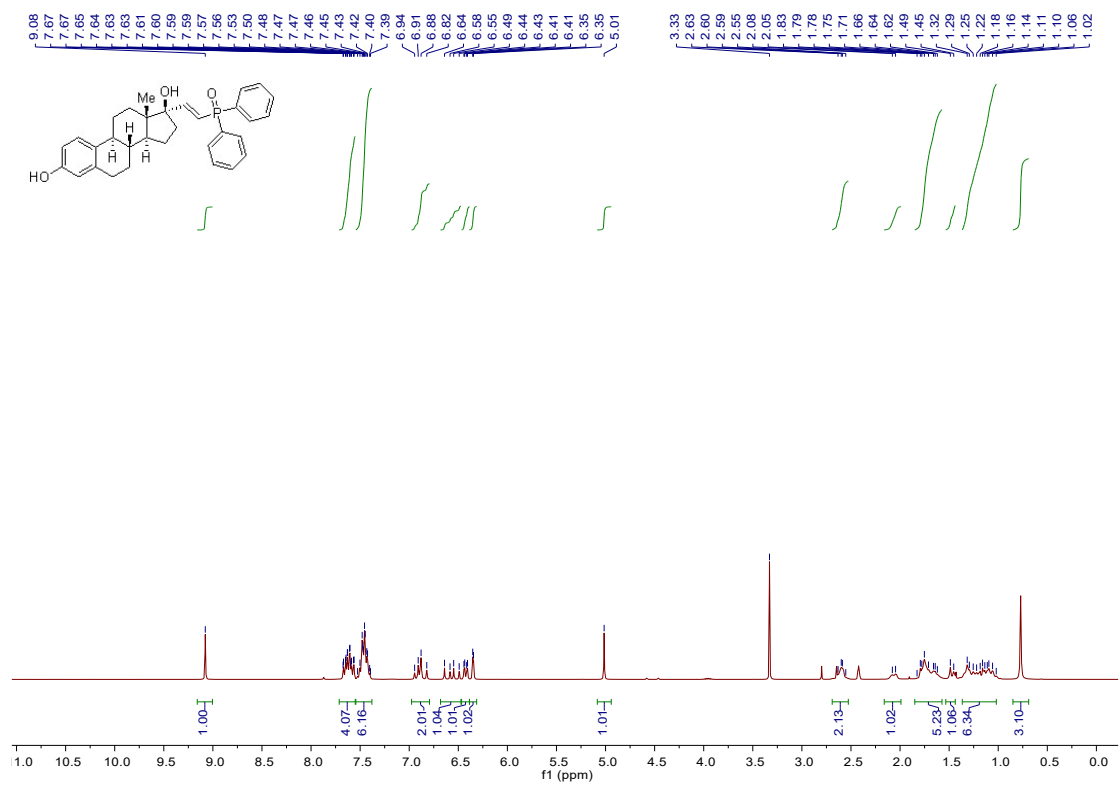

<sup>1</sup>H NMR of compound 5uk



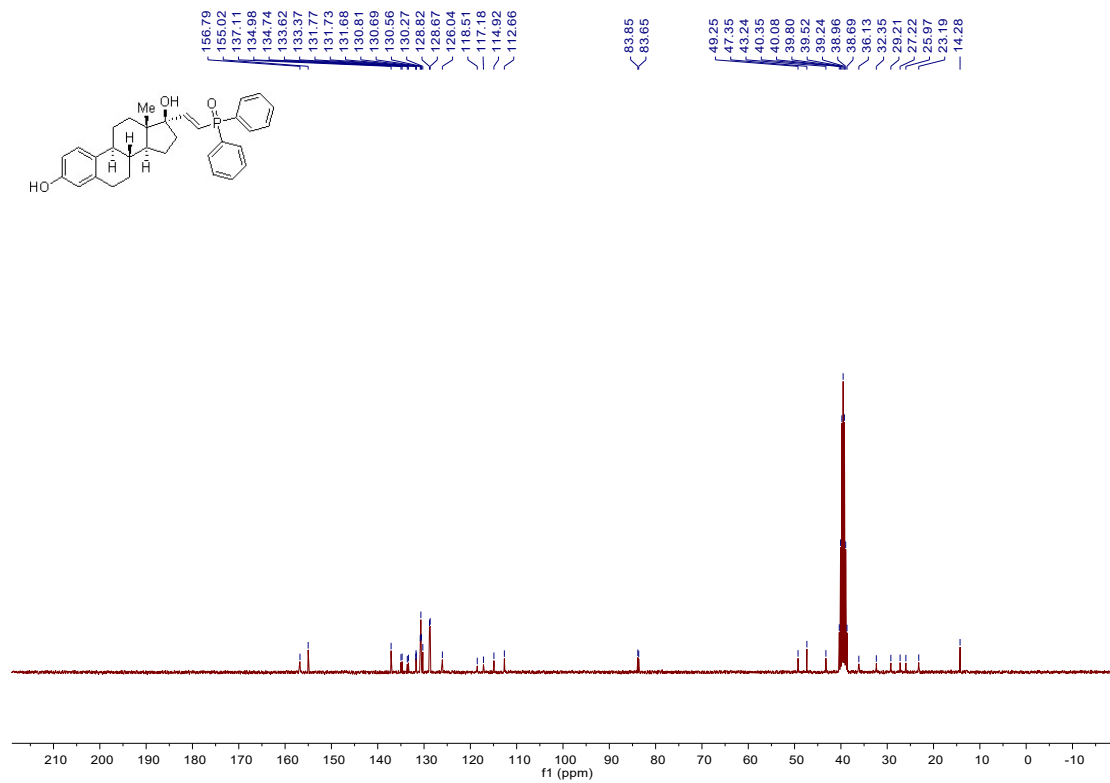

<sup>13</sup>C NMR of compound **5uk**

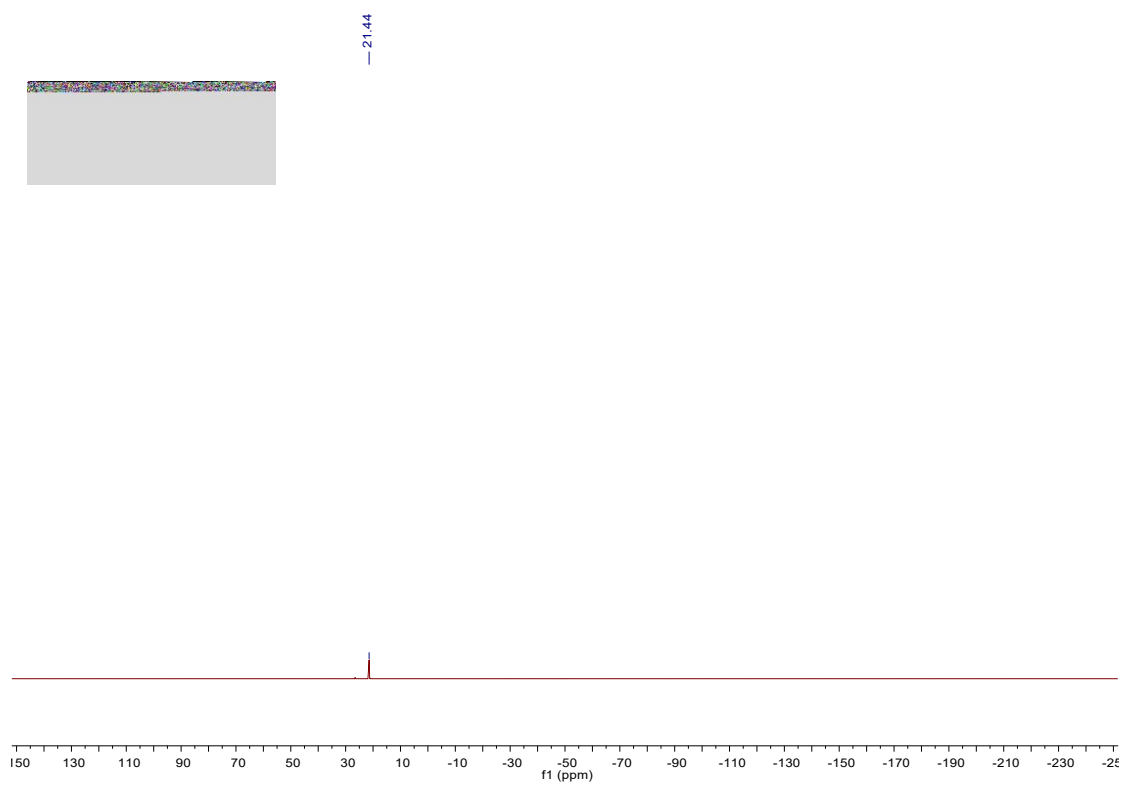

<sup>31</sup>P NMR of compound **5uk**

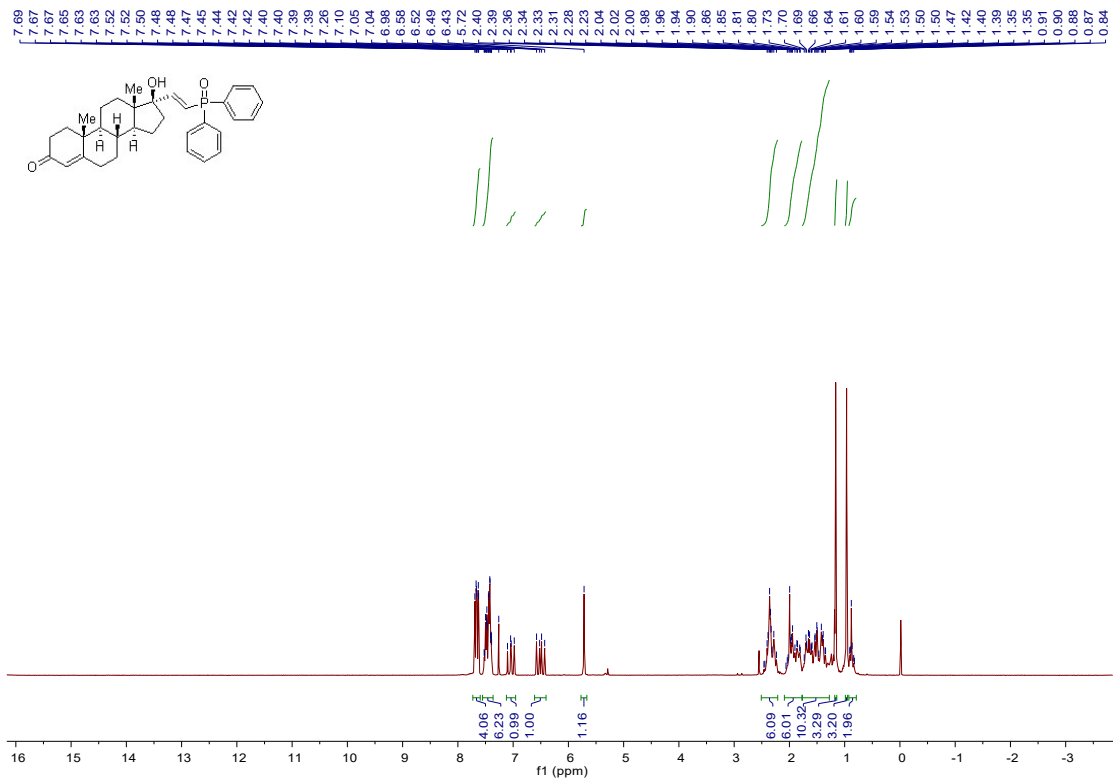

<sup>1</sup>H NMR of compound 5vk

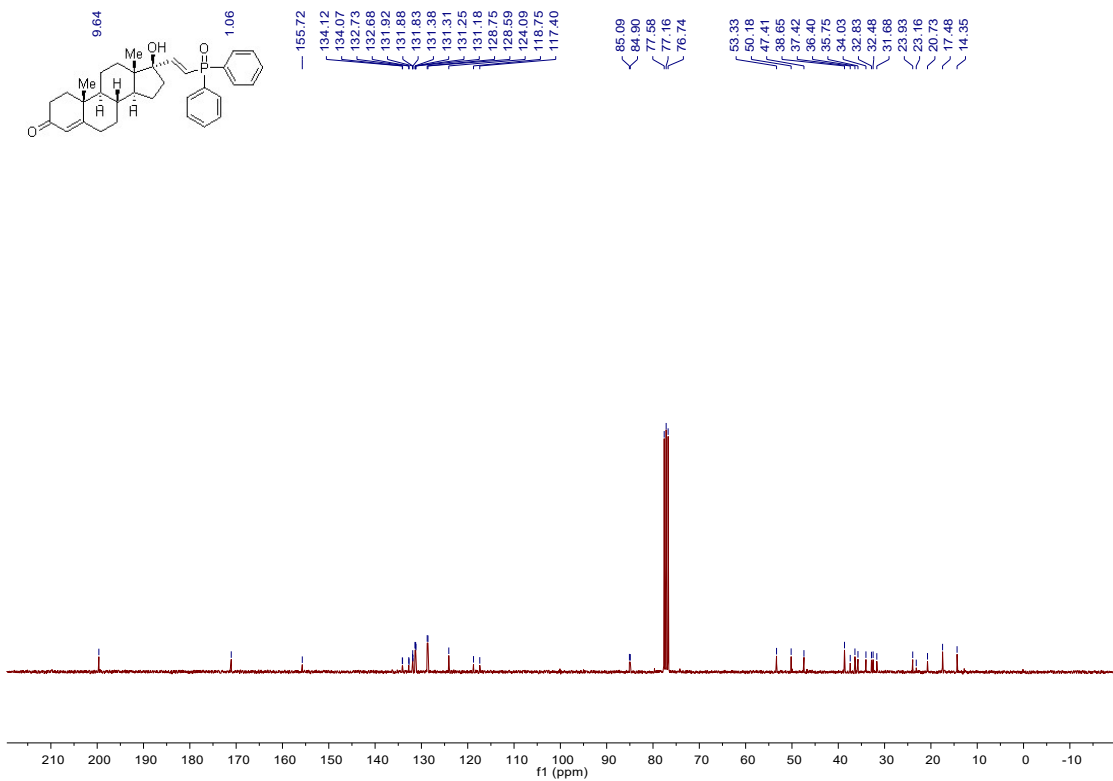

<sup>13</sup>C NMR of compound 5vk

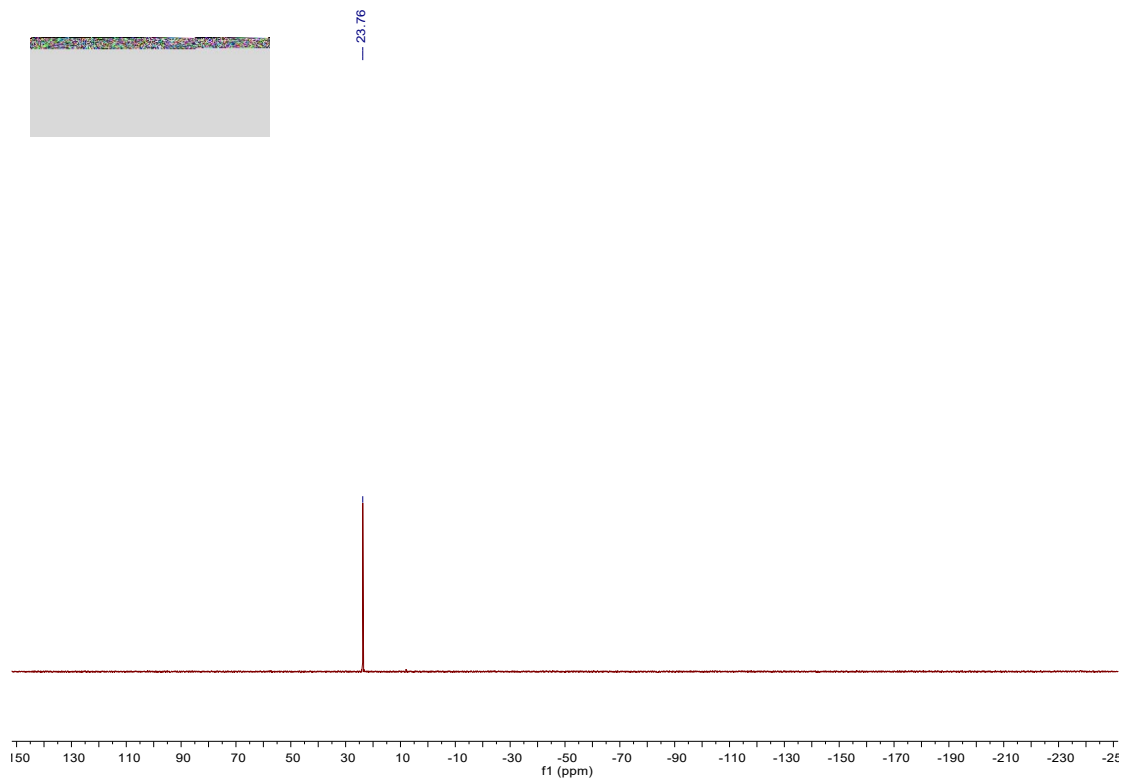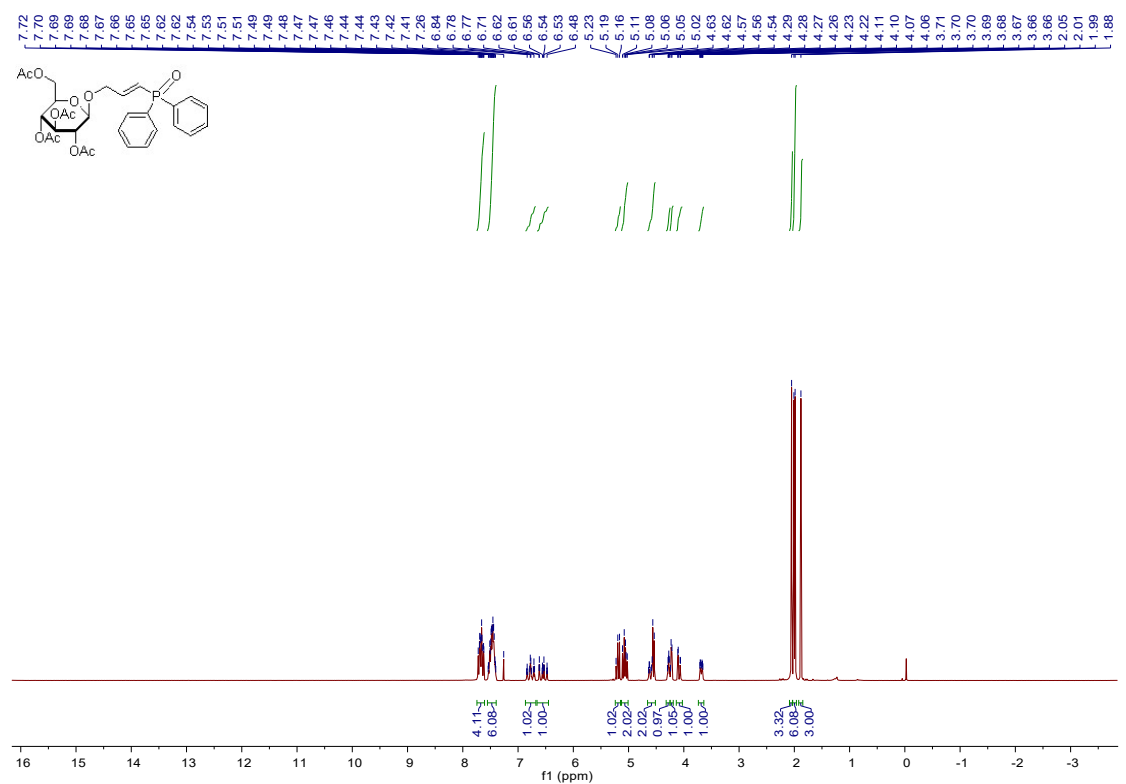

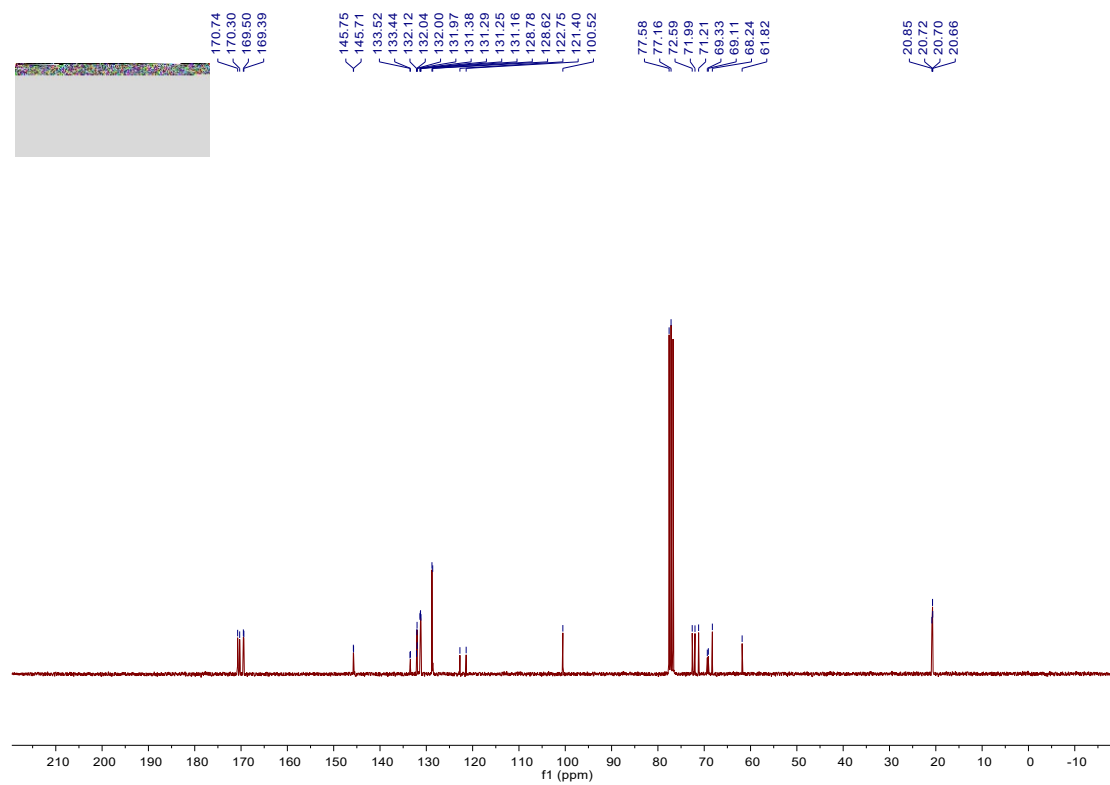

$^{13}\text{C}$  NMR of compound **5wk**

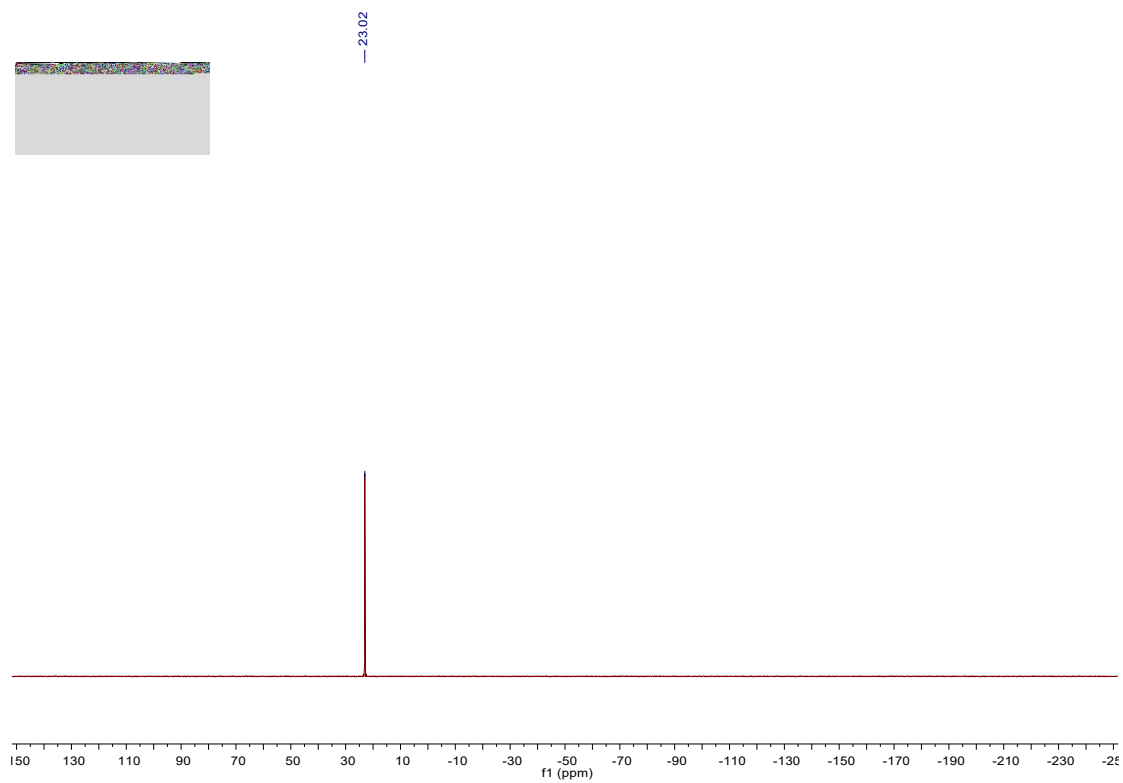

$^{31}\text{P}$  NMR of compound **5wk**

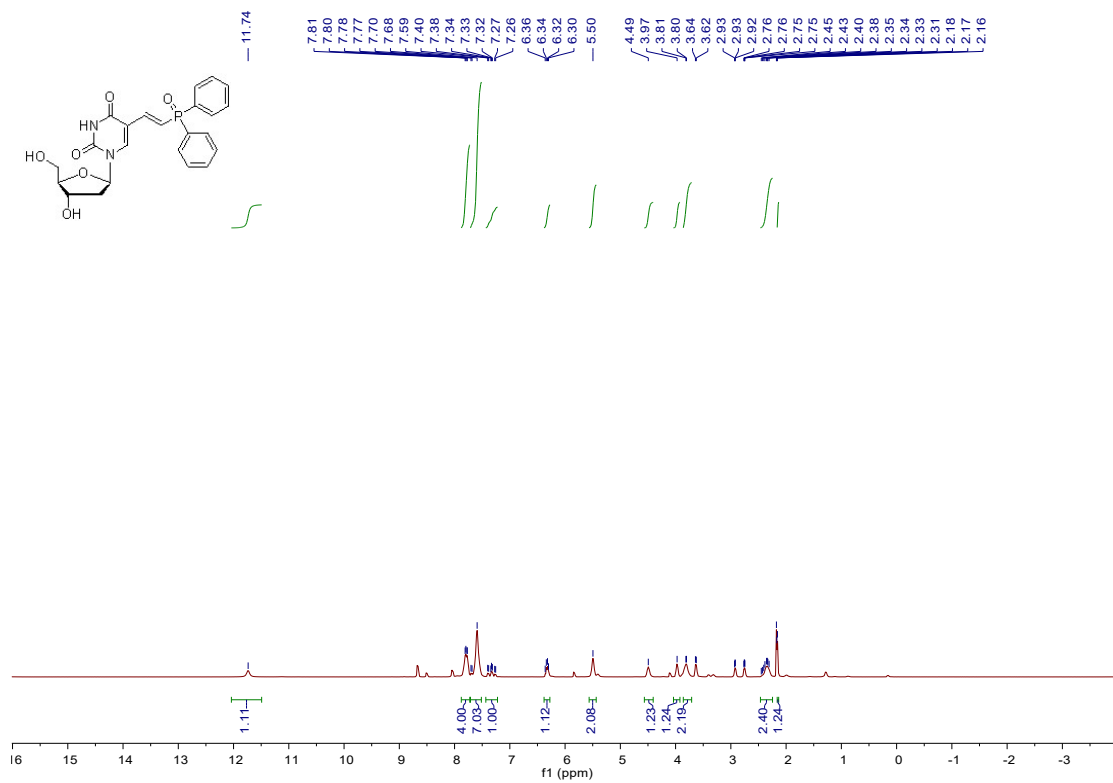

<sup>1</sup>H NMR of compound 5k

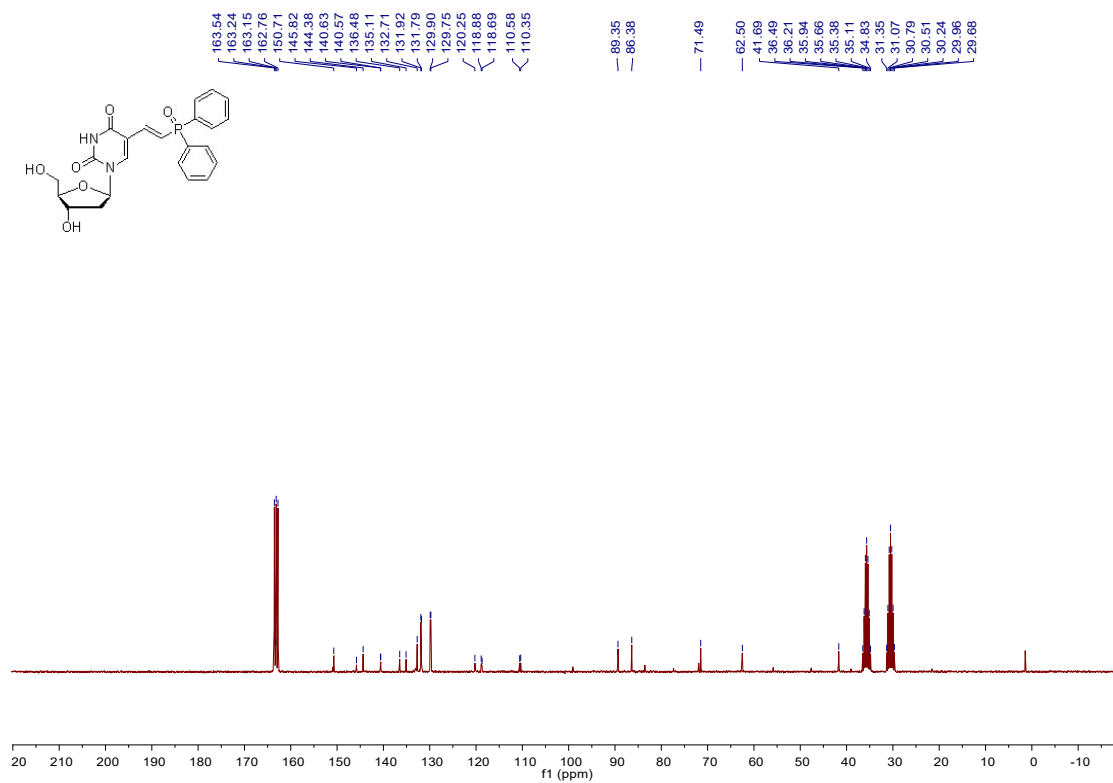

<sup>13</sup>C NMR of compound 5k

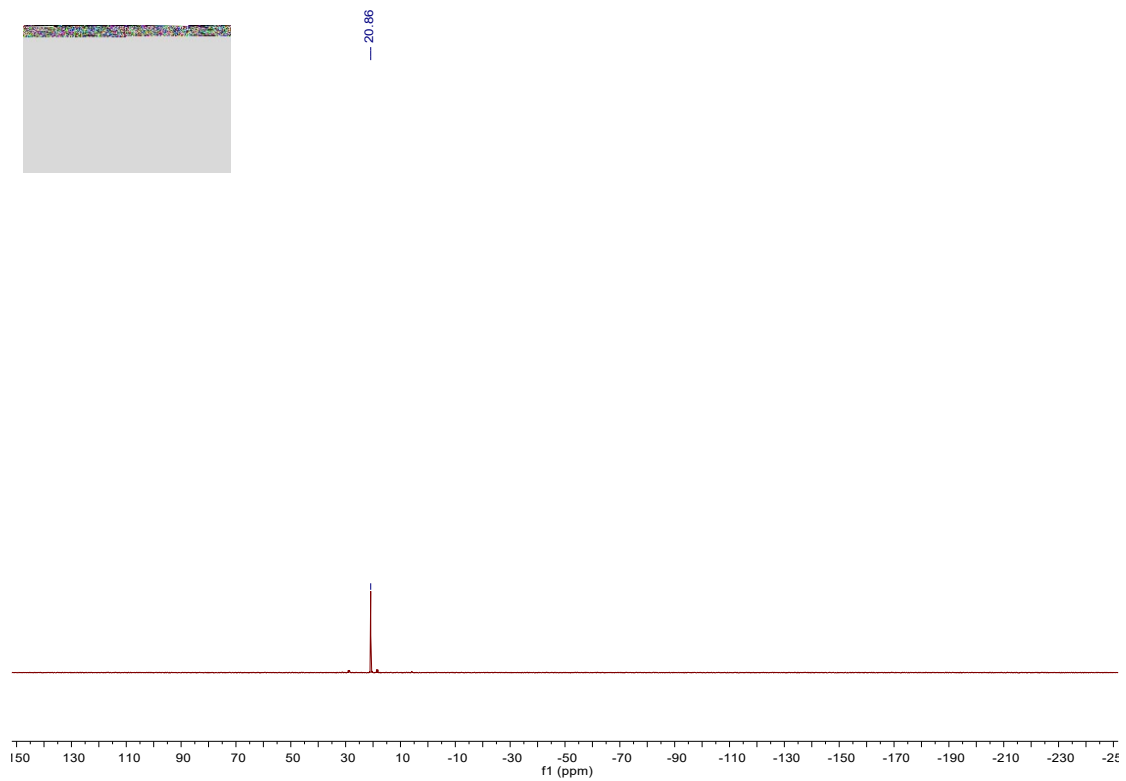

31P NMR of compound 5xk

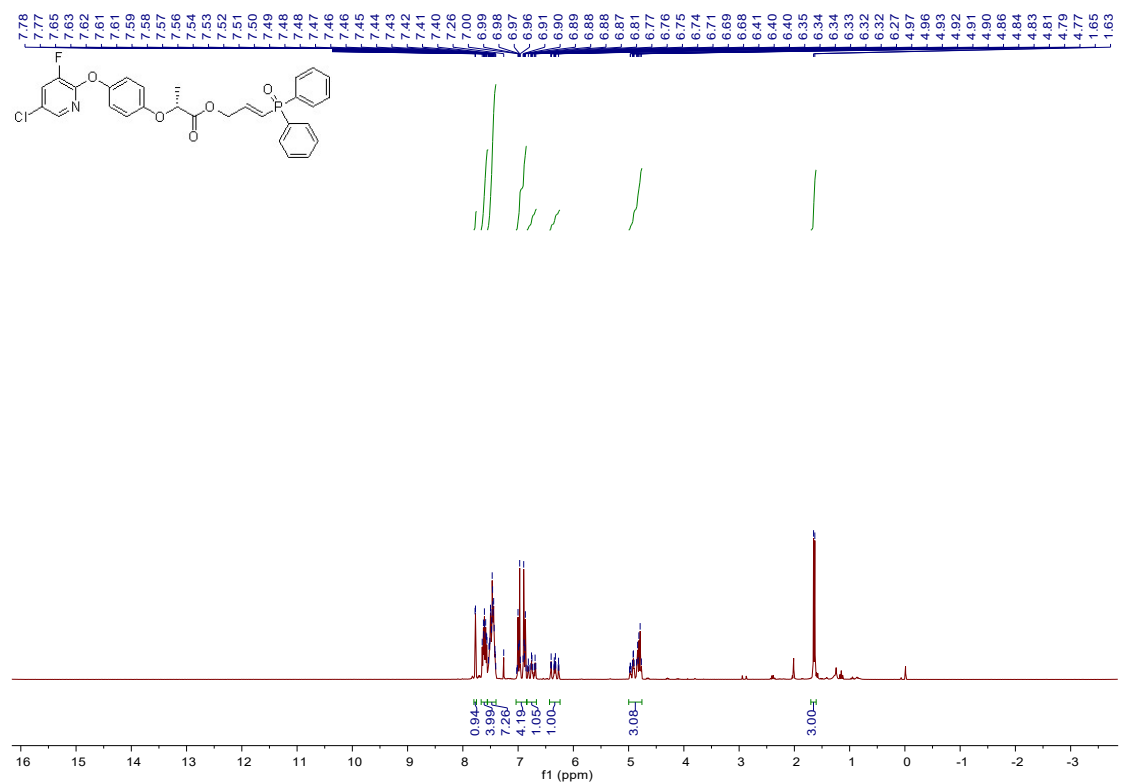

1H NMR of compound 5yk

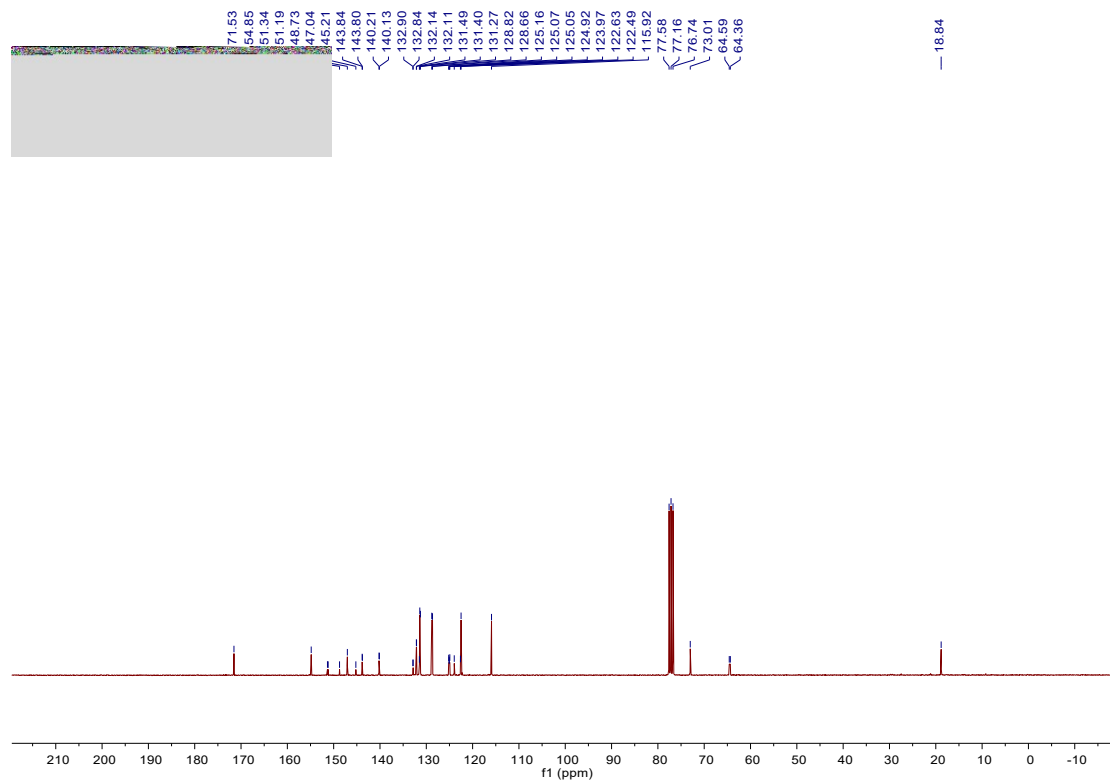

<sup>13</sup>C NMR of compound 5yk

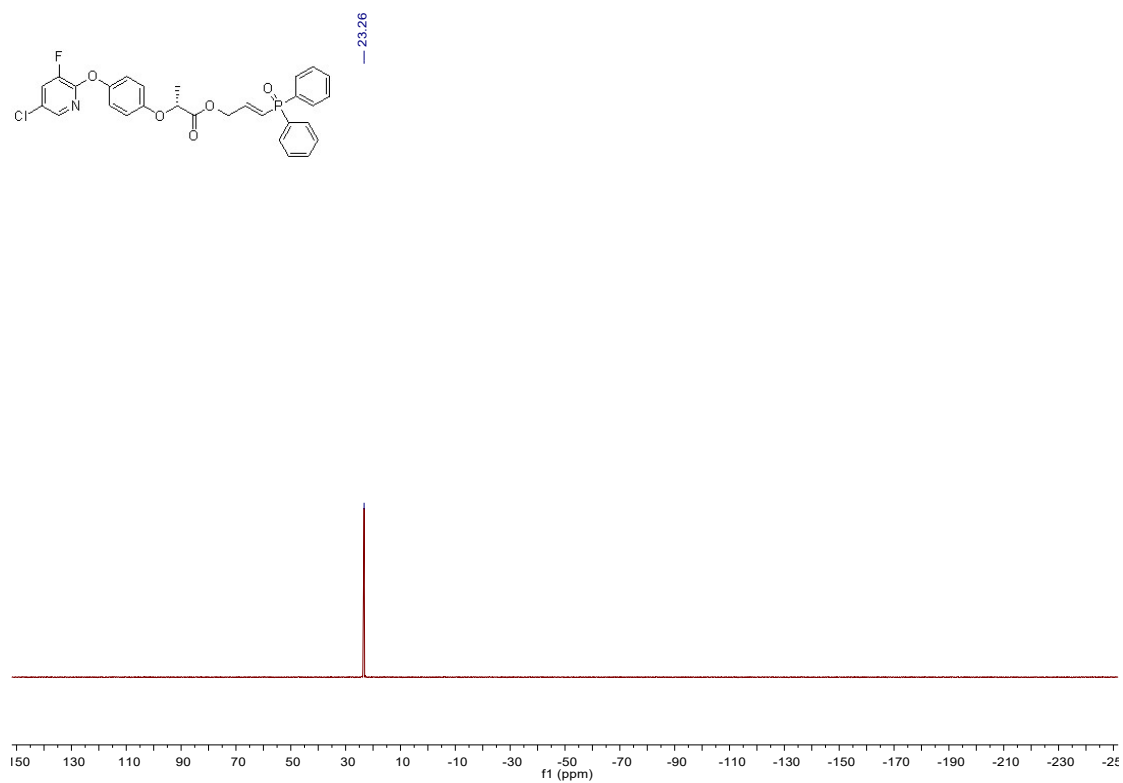

<sup>31</sup>P NMR of compound 5yk

## 9. Reference

- (1) Gaussian 16, M. J. Frisch, G. W. Trucks, H. B. Schlegel, G. E. Scuseria, M. A. Robb, J. R. Cheeseman, G. Scalmani, V. Barone, G. A. Petersson, H. Nakatsuji, X. Li, M. Caricato, A. V. Marenich, J. Bloino, B. G. Janesko, R. Gomperts, B. Mennucci, H. P. Hratchian, J. V. Ortiz, A. F. Izmaylov, J. L. Sonnenberg, D. Williams-Young, F. Ding, F. Lipparini, F. Egidi, J. Goings, B. Peng, A. Petrone, T. Henderson, D. Ranasinghe, V. G. Zakrzewski, J. Gao, N. Rega, G. Zheng, W. Liang, M. Hada, M. Ehara, K. Toyota, R. Fukuda, J. Hasegawa, M. Ishida, T. Nakajima, Y. Honda, O. Kitao, H. Nakai, T. Vreven, K. Throssell, J. A. Jr. Montgomery, J. E. Peralta, F. Ogliaro, M. J. Bearpark, J. J. Heyd, E. N. Brothers, K. N. Kudin, V. N. Staroverov, T. A. Keith, R. Kobayashi, J. Normand, K. Raghavachari, A. P. Rendell, J. C. Burant, S. S. Iyengar, J. Tomasi, M. Cossi, J. M. Millam, M. Klene, C. Adamo, R. Cammi, J. W. Ochterski, R. L. Martin, K. Morokuma, O. Farkas, J. B. Foresman and D. J. Fox, Gaussian, Inc., Wallingford CT, 2016.
- (2) Y. Zhao and D. G. Truhlar, The M06 Suite of Density Functionals for Main group Thermochemistry, Thermochemical Kinetics, Noncovalent Interactions, Excited States, and Transition Elements: Two New Functionals and Systematic Testing of Four M06-class Functionals and 12 Other Functionals, *Theor. Chem. Acc.*, 2008, **120**, 215-241.
- (3) K. Raghavachari and G. W. Trucks, Highly Correlated Systems. Excitation Energies of First Row Transition Metals Sc–Cu, *J. Chem. Phys.*, 1989, **91**, 1062-1065.
- (4) (a) G. A. Petersson, A. Bennett, T. G. Tensfeldt, M. A. Al-Laham, W. A. Shirley and J. Mantzaris, A Complete Basis Set Model Chemistry. I. The Total Energies of Closed-shell Atoms and Hydrides of the First-row Elements, *J. Chem. Phys.*, 1988, **89**, 2193-2218. (b) G. A. Petersson and M. A. Al-Laham, A Complete Basis Set Model Chemistry. II. Open-shell Systems and the Total Energies of the First-row atoms, *J. Chem. Phys.*, 1991, **94**, 6081-6090.
- (5) K. Fukui, The Path of Chemical Reactions - the IRC Approach, *Acc. Chem. Res.*, 1981, **14**, 363–368.
- (6) A. V. Marenich, C. J. Cramer and D. G. Truhlar, Universal Solvation Model Based on Solute Electron Density and on a Continuum Model of the Solvent Defined by the Bulk Dielectric Constant and Atomic Surface Tensions, *J. Phys. Chem. B*, 2009, **113**, 6378–6396.
- (7) K. Raghavachari, J. S. Binkley, R. Seeger and J. A. Pople, Self-Consistent Molecular Orbital Methods. 20. Basis Set for Correlated Wave-functions, *J. Chem. Phys.*, 1980, **72**, 650-654.



- (8) T. Clark, J. Chandrasekhar, G. W. Spitznagel and P. v. R. Schleyer, Efficient Diffuse Function-Augmented Basis-sets for Anion Calculations. 3. The 3-21+G Basis Set for 1st-row Elements, Li-F, *J. Comp. Chem.*, 1983, **4**, 294-301.
- (9) M. J. Frisch, J. A. Pople and J. S. Binkley, Self-Consistent Molecular Orbital Methods. 25. Supplementary Functions for Gaussian Basis Sets, *J. Chem. Phys.*, 1984, **80**, 3265-3269.
- (10) V. Gutierrez, E. Mascaró, F. Alonso, Y. Moglie and G. Radivoy, Direct Synthesis of  $\beta$ -Ketophosphonates and Vinyl Phosphonates from Alkenes or Alkynes Catalyzed by CuNPs/ZnO, *RSC Adv.*, 2015, **5**, 65739-65744.
- (11) M. Koprowski, P. Bałczewski, K. Owsianik, E. Różycka-Sokołowskab and B. Marciniak, Total Synthesis of ( $\pm$ )-Epithuriferic Acid Methyl Ester via Diels–Alder Reaction, *Org. Biomol. Chem.*, 2016, **14**, 1822-1830.
- (12) E. Oehler and E. Zbiral, Synthesis, Reactions and NMR-spectra of Dialkyl 2-Bromo-3-oxo-1-alkenylphosphonates and Dialkyl 3-Oxo-1-alkinylphosphonates, *Monatsh Chem.*, 1984, **115**, 493–508.
- (13) J. B. Dickey and H. W. Coover, Acrylic Acid Esters Containing a Dialkylphosphono Group and Polymers Prepared Therefrom, *US Pat.* 2559854, 1948.
- (14) L. Labaudiniere and R. Burgada, Evolution Thermique de Vinylphosphoranes, *Tetrahedron*, 1986, **42**, 3521-3536.
- (15) K. Afarinkia, M. Evans, J. C. H. Graham and G. Jimenez-Bueno, A Mild and Stereoselective Synthesis of  $\beta$ -Phosphonylacrylates, *Tetrahedron Lett.* 1998, **39**, 433-434.
- (16) S. M. Härling, B. E. Fener, S. Kriek, H. Görls and M. Westerhausen, Potassium Dimesitylphosphinite Catalyzed Intermolecular Hydrophosphorylation of Alkynes, *Organometallics*, 2018, **37**, 4380–4386.
- (17) D. W. Allen and B. G. Hutley, Aryl migration reactions in the alkaline hydrolysis of vinylphosphonium ions. The role of the electron sink and the effects of substitution at the migration terminus, *J. Chem. Soc., Perkin Trans., 1* 1979, 1499-1502.
- (18) C. Larpent, G. Meignan and H. Patin, Organic Chemistry in Water (part v) Nucleophilic Addition of Water-soluble Phosphines on Activated Alkynes: an Efficient Synthesis of New Vinylphosphonium Salts and of Specifically Deuterated Olefins, *Tetrahedron* 1990, **46**, 6381-6398.

- (19) Y. Wakizaka, T. Matsui, D. Uchida and K. Ikeda, Curable Composition, Varnish and Laminate, *US Pat.* 7396588, 2008.
- (20) E. I. Goryunov, G. V. Bodrin, I. B. Goryunova, Yu. V. Nelyubina, P. V. Petrovskii, T. V. Strelkova, A. S. Peregudov, A. G. Matveeva, M. P. Pasechnik, S. V. Matveev and E. E. Nifant'ev,  $\beta$ -Diphenylphosphorylated Alkanones and Related Compounds: synthesis and structure, *Russ. Chem. Bull.*, 2013, **62**, 780–791.
- (21) G. Hu, Y. Gao and Y. Zhao, Copper-Catalyzed Decarboxylative C–P Cross-Coupling of Alkynyl Acids with H-Phosphine Oxides: A Facile and Selective Synthesis of (*E*)-1-Alkenylphosphine Oxides, *Org. Lett.*, 2014, **16**, 4464–4467.
- (22) T. Huang, Y. Saga, H. Guo, A. Yoshimura, A. Ogawa and L.-B. Han, Radical Hydrophosphorylation of Alkynes with  $R_2P(O)H$  Generating Alkenylphosphine Oxides: Scope and Limitations, *J. Org. Chem.*, 2018, **83**, 8743–8749.
- (23) E. Vedejs, J. B. Campbell Jr., R. C. Gadwood, J. D. Rodgers, K. L. Spear and Y. Watanabe, Synthesis of the Cytochalasin D Isoindolone Unit: Solutions to the Problem of Regiochemistry in *N*-Benzoylpyrrolinone Diels-Alder Reactions, *J. Org. Chem.*, 1982, **47**, 1534–1546.
- (24) A. Kondoh, S. Ishikawa and M. Terada, Enantioselective Hydrophosphinylation of 1-Alkenylphosphine Oxides Catalyzed by Chiral Strong Brønsted Base, *Org. Biomol. Chem.*, 2020, **18**, 7814–7817.
- (25) B. K. Pandia, S. Pattanaik and C. Gunanathan, Manganese(I) Catalyzed Alkenylation of Phosphine Oxides Using Alcohols with Liberation of Hydrogen and Water, *J. Org. Chem.*, 2021, **86**, 17848–17855.
- (26) K. Dziuba, S. Frynas and K. Szwaczko, Knoevenagel Condensation of Phosphinoacetic Acids with Aldehydes: An Efficient One-Pot Strategy for the Synthesis of P-Functionalized Alkenyl Compounds, *Synthesis*, 2021, **53**, 2142–2154.
- (27) E. D. Bergmann and M. Dror, The Reaction of Grignard Reagents with Diethyl Styrylphosphonate, *Isr. J. Chem.*, 1965, **3**, 239–240.
- (28) A. R. Cherkasov, V. I. Galkin, I. M. Sibgatullin, N. G. Khusainova, T. A. Zyablikova, B. I. Buzykin and R. A. Cherkasov, Influence of the Inductive Effect of Substituents on the NMR Parameters of Phosphorylated Alkenes, *Russ. J. Gen. Chem.*, 2001, **74**, 343–347.
- (29) R. A. Stockland, A. J. Lipman, J. A. Bawiec III, P. E. Morrison, I. A. Guzei, P. M. Findeis and J.F. Tamplin, Remarkable Tolerance of Ethynyl Steroids to Air and Water in Microwave-assisted

Hydrophosphinylation: Reaction Scope and Limitations, *J. Organomet. Chem.*, 2006, **691**, 4042-4053.
